# Supplementary material for: Regio- and stereo-selective olefinic C–H functionalization of aryl alkenes in ethanol
Source: Royal Society of Chemistry journal article supplement (doi:10.1039/d1qo01676h), 2021-12-27

**Supporting Information**

**For the article entitled**

**Regio- and Stereo-Selective Olefinic C-H  
Functionalization of Aryl Alkenes in Ethanol**

Cong Shen, Yuhang Zhu, Shuqi Jin, Kejie Xu, Shuxin Luo, Lixia Xu, Liangjun Zhong, Guofu

Zhong\* and Jian Zhang\*

zgf@hznu.edu.cn; zhangjian@hznu.edu.cn

**Supporting Information**

**Table of Contents**

|                                                       |    |
|-------------------------------------------------------|----|
| 1. General Methods .....                              | 2  |
| 2. General Procedure for the Substrate Synthesis..... | 3  |
| 3. Optimization of Reaction Conditions .....          | 31 |
| 4. General Procedures for the Cross-Coupling.....     | 34 |
| 5. Synthetic Applications.....                        | 71 |
| 6. References .....                                   | 75 |
| 7. <sup>1</sup> H / <sup>13</sup> C NMR Charts .....  | 76 |

## 1. General Methods

Analytical thin layer chromatography (TLC) was performed using Merck 60 F254 precoated silica gel plate (0.2 mm thickness). Subsequent to elution, plates were visualized using UV radiation (254 nm) on Spectroline Model ENF-24061/F 254 nm. Further visualization was possible by staining with basic solution of potassium permanganate or acidic solution of ceric molybdate. Flash column chromatography was performed using Merck aluminium oxide 90 active neutral with freshly distilled solvents. Columns were typically packed as slurry and equilibrated with the appropriate solvent system prior to use. Proton nuclear magnetic resonance spectra ( $^1\text{H}$  NMR) were recorded on Bruker AMX 400 spectrophotometer ( $\text{CDCl}_3$  as solvent), and Bruker AMX 500 spectrophotometer ( $\text{CDCl}_3$  as solvent). Chemical shifts for  $^1\text{H}$  NMR spectra are reported as  $\delta$  in units of parts per million (ppm) downfield from  $\text{SiMe}_4$  ( $\delta$  0.0) and relative to the signal of chloroform-*d* ( $\delta$  7.26, singlet). Multiplicities were given as: s (singlet), d (doublet), t (triplet), dd (doublets of doublet) or m (multiplets). The number of protons (n) for a given resonance is indicated by nH. Coupling constants are reported as a J value in Hz. Carbon nuclear magnetic resonance spectra ( $^{13}\text{C}$  NMR) are reported as  $\delta$  in units of parts per million (ppm) downfield from  $\text{SiMe}_4$  ( $\delta$  0.0) and relative to the signal of chloroform-*d* ( $\delta$  77.0, triplet). Mass spectrometry was performed by Waters Q-Tof Premier Micromass instrument, using Electro Spray Ionization (ESI) mode. IR spectra were recorded as thin films on KBr plates on a Bio-Rad FTS 165 FTIR spectrometer and are reported in frequency of absorption ( $\text{cm}^{-1}$ ). The enantiomeric excesses (ee) of the products were determined by chiral stationary phase HPLC with Chiralpak (AD-H, OD-H, IA-H, IC-H, IB-H). Optical rotations were measured with Rudolph Autopol IVT.  $\text{Pd}(\text{OAc})_2$  were purchased from TCI and used directly. Other reagents, unless otherwise noted below, are commercially available from TCI, Energy Chemical, Alfa Aesar (China) Chemical Co. Ltd. and used without further purification. Aroylsilanes were prepared from aroyl chlorides by reported method.

## 2. General Procedure for Substrate Synthesis

### 2.1 General Procedure A for Substrate Synthesis

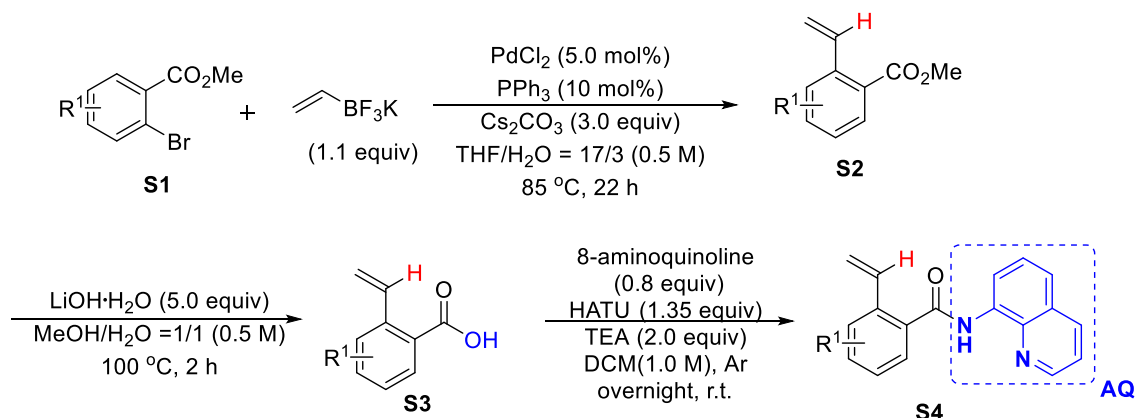

**General Procedure A for Heck Reaction<sup>[1]</sup>:** A solution of potassium vinyltrifluoroborate (1.1 equiv),  $\text{PdCl}_2$  (5.0 mol%),  $\text{PPh}_3$  (10.0 mol%),  $\text{Cs}_2\text{CO}_3$  (3.0 equiv), and substituted ester (**S1**) (5.0 mmol) in THF/ $\text{H}_2\text{O}$  (17:3) (0.5 M) was heated at 85 °C under  $\text{N}_2$  atmosphere in a sealed tube. The reaction mixture was stirred at 85 °C for 22 h, then cooled to rt and diluted with  $\text{H}_2\text{O}$  (3 mL) followed by extraction with EtOAc (30 mL  $\times$  3). The solvent was removed in vacuo, and the crud product was purified by silica gel chromatography ( $\text{SiO}_2$ , PE/EA = 98/2) to obtain the corresponding product.

**General Procedure A for Ester Hydrolysis<sup>[2]</sup>:** The appropriate alkenyl ester (**S2**) was dissolved in a 1 : 1 mixture of MeOH and  $\text{H}_2\text{O}$ , and  $\text{LiOH}\cdot\text{H}_2\text{O}$  (5.0 equiv) was added. The reaction was stirred vigorously at 100 °C for 2 h, and reaction progress was monitored by GC-MS. When full conversion was observed, the resulting mixture was diluted with water and washed with EA ( $\times$ 2). The organic layer was discarded. The aqueous layer was acidified with 2 M HCl solution and extracted with EA ( $\times$ 3). The combined organic layers were dried over anhydrous  $\text{Na}_2\text{SO}_4$ . The solvent was removed in vacuo, and the resulting acid (**S3**) was used in the next step without further purification.

**General Procedure A for AQ Amide Preparation:** The appropriate carboxylic acid (**S3**), 8-aminoquinoline (0.8 equiv), HATU (1.35 equiv) and TEA (2.0 equiv) were dissolved in DCM (1 M) and stirred at room temperature, and reaction progress was

monitored by GC-MS. After 8-aminoquinoline was fully consumed (approximately 16 h), the resulting mixture was washed with 1 M HCl (aq.) solution, and the organic layer was washed with brine and dried over anhydrous Na<sub>2</sub>SO<sub>4</sub>. The solvent was removed in vacuo, and the resulting residue was purified by silica gel column chromatography (PE/EA = 4/1).

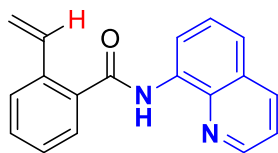

**N-(Quinolin-8-yl)-2-vinylbenzamide (1a)**

Following the general procedure A, **1a** was obtained as a white solid (0.98 g, 72% yield for three steps, m.p. = 117-118 °C).

**<sup>1</sup>H NMR** (500 MHz, CDCl<sub>3</sub>)

δ 10.24 (s, 1H), 8.95 (d, *J* = 7.5 Hz, 1H), 8.76 (dd, *J* = 4.0, 1.5 Hz, 1H), 8.18 (d, *J* = 9.5 Hz, 1H), 7.72 (d, *J* = 7.5 Hz, 1H), 7.67 (d, *J* = 8.0 Hz, 1H), 7.62 – 7.55 (m, 2H), 7.49 (t, *J* = 7.5 Hz, 1H), 7.45 (dd, *J* = 8.0, 4.0 Hz, 1H), 7.40 (t, *J* = 7.5 Hz, 1H), 7.25 (dd, *J* = 17.5, 11.0 Hz, 1H), 5.80 (d, *J* = 17.5 Hz, 1H), 5.37 (d, *J* = 11.0 Hz, 1H).

**<sup>13</sup>C NMR** (125 MHz, CDCl<sub>3</sub>)

δ 167.62, 148.27, 138.64, 136.61, 136.33, 135.63, 134.69, 134.57, 130.57, 128.00, 127.86, 127.64, 127.42, 126.65, 121.89, 121.67, 117.01, 116.63.

**HRMS (ESI)** for C<sub>18</sub>H<sub>14</sub>N<sub>2</sub>ONa [M+Na]<sup>+</sup>: 297.0998, found: 298.1006.

**FTIR** (KBr, cm<sup>-1</sup>)

3565.42, 3506.54, 3475.70, 3385.98, 3357.94, 2959.81, 2926.17, 2850.47, 2331.78, 1684.11, 1653.27, 1636.45, 1574.77, 1557.94, 1454.21, 1384.11, 1328.04, 1257.94.

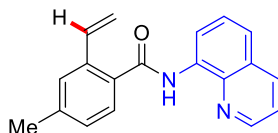

**4-Methyl-N-(quinolin-8-yl)-6-vinylbenzamide (1b)**

Following the general procedure A, **1b** was obtained as a white solid (0.99 g, 68% yield for three steps, m.p. = 79-80 °C).

**<sup>1</sup>H NMR** (500 MHz, CDCl<sub>3</sub>)



$\delta$  10.24 (s, 1H), 8.94 (d,  $J = 7.5$  Hz, 1H), 8.76 (dd,  $J = 4.0, 1.5$  Hz, 1H), 8.17 (dd,  $J = 8.0, 1.5$  Hz, 1H), 7.64 (d,  $J = 8.0$  Hz, 1H), 7.59 (t,  $J = 8.0$  Hz, 1H), 7.54 (dd,  $J = 8.5, 1.5$  Hz, 1H), 7.47 – 7.43 (m, 2H), 7.26 (d,  $J = 17.5$  Hz, 1H), 7.22 (d,  $J = 8.5$  Hz, 1H), 5.78 (dd,  $J = 17.5, 1.1$  Hz, 1H), 5.36 (dd,  $J = 11.0, 1.0$  Hz, 1H), 2.44 (s, 3H).

**$^{13}\text{C}$  NMR** (125 MHz,  $\text{CDCl}_3$ )

$\delta$  167.65, 148.23, 140.76, 138.66, 136.73, 136.30, 134.84, 134.81, 132.88, 128.60, 127.99, 127.78, 127.43, 127.33, 121.74, 121.64, 116.72, 116.54, 21.49.

**HRMS (ESI)** for  $\text{C}_{19}\text{H}_{16}\text{N}_2\text{ONa}$   $[\text{M}+\text{Na}]^+$ : 311.1155, found: 311.1147.

**FTIR** (KBr,  $\text{cm}^{-1}$ )

3565.42, 3509.35, 3472.90, 3444.86, 3383.18, 2354.21, 1684.11, 1670.09, 1653.27, 1636.45, 1616.82, 1557.94, 1538.32, 1521.50, 1507.48, 1473.83, 1457.01, 1420.56, 1260.75, 1145.79, 828.97, 792.52.

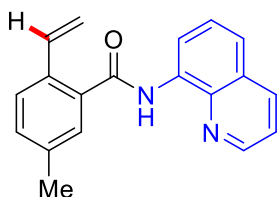

**5-Methyl-N-(quinolin-8-yl)-2-vinylbenzamide (**1c**)**

Following the general procedure A, **1c** was obtained as a white solid (0.35 g, 24% yield for three steps, m.p. = 91-92 °C).

**$^1\text{H}$  NMR** (500 MHz,  $\text{CDCl}_3$ )

$\delta$  10.20 (s, 1H), 8.95 (d,  $J = 7.5$  Hz, 1H), 8.77 (dd,  $J = 4.0, 1.5$  Hz, 1H), 8.18 (dd,  $J = 8.5, 1.5$  Hz, 1H), 7.62 – 7.54 (m, 3H), 7.52 (s, 1H), 7.45 (dd,  $J = 8.0, 4.0$  Hz, 1H), 7.30 (dd,  $J = 8.0, 2.0$  Hz, 1H), 7.18 (dd,  $J = 17.5, 11.0$  Hz, 1H), 5.75 (dd,  $J = 17.5, 1.5$  Hz, 1H), 5.31 (dd,  $J = 11.0, 1.0$  Hz, 1H), 2.43 (s, 3H).

**$^{13}\text{C}$  NMR** (125 MHz,  $\text{CDCl}_3$ )

$\delta$  168.73, 148.20, 138.58, 136.90, 136.85, 136.30, 136.10, 134.81, 133.97, 131.93, 128.00, 127.45, 127.21, 125.61, 121.69, 121.62, 120.60, 116.52, 20.65.

**HRMS (ESI)** for  $\text{C}_{19}\text{H}_{16}\text{N}_2\text{ONa}$   $[\text{M}+\text{Na}]^+$ : 311.1155, found: 311.1158.

**FTIR** (KBr, cm<sup>-1</sup>)

3565.42, 3509.35, 3475.70, 3444.86, 3416.82, 2354.21, 1672.90,  
1633.64, 1616.82, 1557.94, 1521.50, 1487.85, 1457.01, 1384.11,  
1322.43, 1260.75, 1196.26, 826.17.

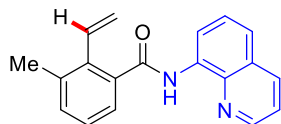

**3-Methyl-N-(quinolin-8-yl)-2-vinylbenzamide (1d)**

Following the general procedure A, **1d** was obtained as a white solid (0.28 g, 19% yield for three steps, m.p. = 125-126 °C).

**<sup>1</sup>H NMR** (500 MHz, CDCl<sub>3</sub>)

δ 10.12 (s, 1H), 8.91 (d, *J* = 7.5 Hz, 1H), 8.76 (d, *J* = 6.0 Hz, 1H),  
8.17 (d, *J* = 10.0 Hz, 1H), 7.59 – 7.56 (m, 1H), 7.55 – 7.53 (m, 2H),  
7.44 (dd, *J* = 8.0, 4.0 Hz, 1H), 7.33 – 7.27 (m, 2H), 6.99 (dd, *J* =  
17.5, 11.5 Hz, 1H), 5.47 (dd, *J* = 13.5, 1.5 Hz, 1H), 5.44 (dd, *J* = 7.5,  
1.5 Hz, 1H), 2.40 (s, 3H).

**<sup>13</sup>C NMR** (125 MHz, CDCl<sub>3</sub>)

δ 167.84, 148.27, 138.65, 137.85, 136.32, 135.60, 134.72, 134.35,  
133.68, 131.33, 128.13, 128.00, 127.43, 126.52, 121.85, 121.66,  
116.65, 116.13, 21.17.

**HRMS (ESI)** for C<sub>19</sub>H<sub>16</sub>N<sub>2</sub>ONa [M+Na]<sup>+</sup>: 311.1155, found: 311.1149.

**FTIR** (KBr, cm<sup>-1</sup>)

3646.73, 3629.91, 3565.42, 3419.63, 3555.14, 2920.56, 2359.81,  
1670.09, 1521.50, 1485.05, 1384.14, 1325.23, 1271.96, 826.17,  
792.52, 761.68.

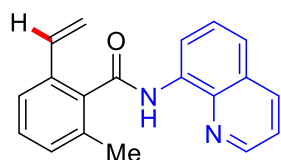

**2-Methyl-N-(quinolin-8-yl)-6-vinylbenzamide (1e)**

Following the general procedure A, **1e** was obtained as a green solid (0.23g, 16% yield for three steps, m.p. = 77-78 °C).

**<sup>1</sup>H NMR** (500 MHz, CDCl<sub>3</sub>)

δ 9.95 (s, 1H), 9.00 (dd, *J* = 7.5, 1.5 Hz, 1H), 8.73 (dd, *J* = 4.0, 1.5

Hz, 1H), 8.18 (dd,  $J = 8.0, 1.5$  Hz, 1H), 7.65 – 7.56 (m, 2H), 7.50 (d,  $J = 8.0$  Hz, 1H), 7.44 (dd,  $J = 8.0, 4.0$  Hz, 1H), 7.33 (t,  $J = 7.5$  Hz, 1H), 7.20 (d,  $J = 7.5$  Hz, 1H), 6.93 (dd,  $J = 17.5, 11.0$  Hz, 1H), 5.78 (dd,  $J = 17.5, 1.0$  Hz, 1H), 5.26 (dd,  $J = 11.0, 1.0$  Hz, 1H), 2.44 (s, 3H).

**<sup>13</sup>C NMR** (125 MHz, CDCl<sub>3</sub>)

δ 165.25, 151.91, 140.83, 137.34, 137.27, 135.06, 135.06, 133.41, 132.93, 131.68, 129.80, 129.41, 126.25, 123.40, 121.54, 120.90, 118.55, 117.60, 20.12.

**HRMS (ESI)** for C<sub>19</sub>H<sub>16</sub>N<sub>2</sub>ONa [M+Na]<sup>+</sup>: 311.1155, found: 311.1163.

**FTIR** (KBr, cm<sup>-1</sup>)

3568.22, 3453.27, 3419.63, 2923.36, 2853.27, 1644.86, 1636.45, 1557.94, 1541.12, 1504.67, 1400.93, 1381.31, 1204.67, 963.55.

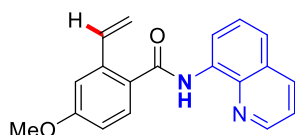

**4-Methoxy-N-(quinolin-8-yl)-2-vinylbenzamide (1f)**

Following the general procedure A, **1f** was obtained as a white solid (0.65 g, 43% yield for three steps, m.p. = 109-110 °C).

**<sup>1</sup>H NMR** (500 MHz, CDCl<sub>3</sub>)

δ 10.25 (s, 1H), 8.93 (dd,  $J = 7.5, 1.0$  Hz, 1H), 8.77 (dd,  $J = 4.0, 1.5$  Hz, 1H), 8.17 (dd,  $J = 8.0, 1.5$  Hz, 1H), 7.73 (d,  $J = 8.5$  Hz, 1H), 7.61 – 7.53 (m, 2H), 7.45 (dd,  $J = 8.0, 4.0$  Hz, 1H), 7.30 (dd,  $J = 17.5, 11.0$  Hz, 1H), 7.14 (d,  $J = 2.5$  Hz, 1H), 6.93 (dd,  $J = 8.5, 2.5$  Hz, 1H), 5.78 (dd,  $J = 17.5, 1.0$  Hz, 1H), 5.39 (dd,  $J = 11.0, 1.0$  Hz, 1H), 3.90 (s, 3H).

**<sup>13</sup>C NMR** (125 MHz, CDCl<sub>3</sub>)

δ 167.21, 161.32, 148.22, 139.04, 138.69, 136.32, 135.03, 134.87, 129.68, 128.21, 128.00, 127.45, 121.66, 121.64, 117.13, 116.49, 113.26, 112.04, 55.46.

**HRMS (ESI)** for C<sub>19</sub>H<sub>16</sub>N<sub>2</sub>O<sub>2</sub>Na [M+Na]<sup>+</sup>: 327.1104, found: 327.1095.

**FTIR** (KBr, cm<sup>-1</sup>)

3478.50, 3419.63, 2351.40, 1670.09, 1597.20, 1524.30, 1482.24,  
1423.36, 1384.11, 1325.23, 1260.75, 1235.51.

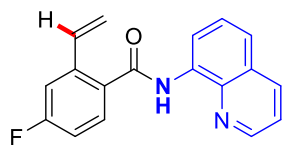

**4-Fluoro-N-(quinolin-8-yl)-2-vinylbenzamide (1g)**

Following the general procedure A, **1g** was obtained as a white solid (0.53 g, 36% yield for three steps, m.p. = 108-109 °C).

**<sup>1</sup>H NMR** (500 MHz, CDCl<sub>3</sub>)

δ 10.22 (s, 1H), 8.92 (dd,  $J = 7.0, 1.0$  Hz, 1H), 8.77 (dd,  $J = 4.0, 1.5$  Hz, 1H), 8.19 (dd,  $J = 8.0, 1.5$  Hz, 1H), 7.74 (dd,  $J = 8.5, 5.5$  Hz, 1H), 7.62 – 7.55 (m, 2H), 7.46 (dd,  $J = 8.0, 4.0$  Hz, 1H), 7.34 (dd,  $J = 10.0, 2.5$  Hz, 1H), 7.27–7.21 (m, 1H), 7.11–7.09 (m, 1H), 5.80 (d,  $J = 17.0$  Hz, 1H), 5.43 (d,  $J = 11.5$  Hz, 1H).

**<sup>13</sup>C NMR** (125 MHz, CDCl<sub>3</sub>)

δ 165.57, 162.90 (d,  $J_{CF} = 248.6$  Hz), 147.29, 138.48 (d,  $J_{CF} = 8.3$  Hz), 137.57, 135.34, 133.51, 132.74, 130.78 (d,  $J_{CF} = 2.9$  Hz), 128.95 (d,  $J_{CF} = 9.0$  Hz), 126.96, 126.36, 120.98, 120.70, 117.12, 115.61, 113.82 (d,  $J_{CF} = 21.8$  Hz), 112.29 (d,  $J_{CF} = 22.3$  Hz).

**<sup>19</sup>F NMR** (471 MHz, CDCl<sub>3</sub>)

δ -109.61.

**HRMS (ESI)** for C<sub>18</sub>H<sub>13</sub>N<sub>2</sub>OFNa [M+Na]<sup>+</sup>: 315.0904, found: 315.0897.

**FTIR** (KBr, cm<sup>-1</sup>)

3571.03, 3509.35, 3453.27, 3416.82, 3385.98, 2926.17, 2351.40, 1675.70, 1656.07, 1633.64, 1541.12, 1521.50, 1485.05, 1386.92, 1328.04, 1263.55, 1128.97, 826.17, 786.92.

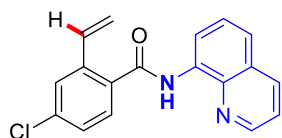

**4-Chloro-N-(quinolin-8-yl)-2-vinylbenzamide (1h)**

Following the general procedure A, **1h** was obtained as a white solid (0.71 g, 46% yield for three steps, m.p. = 123-124 °C).

**<sup>1</sup>H NMR** (500 MHz, CDCl<sub>3</sub>)

$\delta$  10.23 (s, 1H), 8.92 (dd,  $J = 7.5, 1.0$  Hz, 1H), 8.77 (dd,  $J = 4.0, 1.5$  Hz, 1H), 8.18 (dd,  $J = 8.0, 1.5$  Hz, 1H), 7.67 (d,  $J = 8.0$  Hz, 1H), 7.63 (d,  $J = 2.0$  Hz, 1H), 7.61 – 7.55 (m, 2H), 7.46 (dd,  $J = 8.0, 4.2$  Hz, 1H), 7.37 (dd,  $J = 8.0, 2.0$  Hz, 1H), 7.20 (dd,  $J = 17.5, 11.0$  Hz, 1H), 5.81 (dd,  $J = 17.5, 1.0$  Hz, 1H), 5.43 (dd,  $J = 11.0, 1.0$  Hz, 1H).

**$^{13}\text{C}$  NMR** (125 MHz,  $\text{CDCl}_3$ )

$\delta$  166.52, 148.35, 138.58, 138.47, 136.71, 136.37, 134.47, 133.88, 133.56, 129.16, 127.99, 127.88, 127.39, 126.72, 122.10, 121.75, 118.32, 116.69.

**HRMS (ESI)** for  $\text{C}_{18}\text{H}_{13}\text{N}_2\text{OCl Na}$   $[\text{M}+\text{Na}]^+$ : 331.0609, found: 331.0618.

**FTIR** (KBr,  $\text{cm}^{-1}$ )

3458.88, 3419.63, 1656.07, 1650.47, 1636.45, 1622.43, 1560.75, 1538.32, 1507.48, 1457.01, 1400.93.

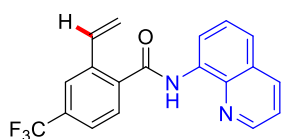

***N*-(Quinolin-8-yl)-4-(trifluoromethyl)-2-vinylbenzamide  
(**1i**)**

Following the general procedure A, **1i** was obtained as a white solid (0.87 g, 51% yield for three steps, m.p. = 101-102 °C).

**$^1\text{H}$  NMR** (500 MHz,  $\text{CDCl}_3$ )

$\delta$  10.26 (s, 1H), 8.93 (dd,  $J = 7.0, 1.5$  Hz, 1H), 8.77 (dd,  $J = 4.0, 1.5$  Hz, 1H), 8.20 (dd,  $J = 8.0, 1.5$  Hz, 1H), 7.91 (s, 1H), 7.83 (d,  $J = 8.0$  Hz, 1H), 7.676 (dd,  $J = 8.0, 1.0$  Hz, 1H), 7.63 – 7.58 (m, 2H), 7.47 (dd,  $J = 8.0, 4.0$  Hz, 1H), 7.23 (dd,  $J = 17.5, 11.0$  Hz, 1H), 5.89 (d,  $J = 17.5$  Hz, 1H), 5.49 (d,  $J = 11.0$  Hz, 1H).

**$^{13}\text{C}$  NMR** (125 MHz,  $\text{CDCl}_3$ )

$\delta$  166.27, 148.42, 138.55, 137.24, 136.41, 134.28, 133.35, 132.52 (q,  $J_{\text{CF}} = 32.8$  Hz), 130.82, 128.24, 128.00, 127.37, 124.52 (q,  $J_{\text{CF}} = 3.6$  Hz), 123.71 (q,  $J_{\text{CF}} = 271.0$  Hz), 123.59 (q,  $J_{\text{CF}} = 3.9$  Hz), 122.34, 121.82, 118.85, 116.82.

**$^{19}\text{F}$  NMR** (471 MHz,  $\text{CDCl}_3$ )

$\delta$  -62.99.

**HRMS (ESI)** for  $C_{19}H_{13}N_2OF_2Na$   $[M+Na]^+$ : 365.0872, found: 365.0865.

**FTIR** (KBr,  $cm^{-1}$ )

3458.88, 3447.66, 3414.02, 2923.36, 2850.47, 2357.01, 2331.78,  
1684.11, 1656.07, 1633.64, 1563.55, 1541.12, 1510.28, 1406.54,  
1392.52.

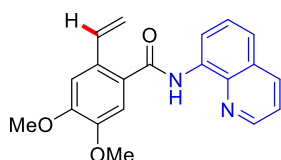

**4,5-Dimethoxy-N-(quinolin-8-yl)-2-vinylbenzamide (1j)**

Following the general procedure A, **1j** was obtained as a kelly solid (0.13 g, 8% yield for three steps, m.p. = 126-127 °C).

**<sup>1</sup>H NMR** (500 MHz,  $CDCl_3$ )

$\delta$  10.24 (s, 1H), 8.93 (d,  $J$  = 7.0 Hz, 1H), 8.77 (dd,  $J$  = 4.0, 1.5 Hz, 1H), 8.18 (dd,  $J$  = 8.0, 1.5 Hz, 1H), 7.62 – 7.54 (m, 2H), 7.46 (dd,  $J$  = 8.0, 4.0 Hz, 1H), 7.27 (s, 1H), 7.23 (dd,  $J$  = 17.5, 11.0 Hz, 1H), 7.11 (s, 1H), 5.73 (dd,  $J$  = 17.5, 1.0 Hz, 1H), 5.33 (dd,  $J$  = 11.0, 1.0 Hz, 1H), 3.99 (s, 3H), 3.96 (s, 3H).

**<sup>13</sup>C NMR** (125 MHz,  $CDCl_3$ )

$\delta$  167.16, 150.78, 148.70, 148.28, 138.71, 136.31, 134.75, 134.50, 130.05, 128.20, 128.01, 127.44, 121.77, 121.66, 116.57, 115.78, 110.91, 108.99, 56.18, 56.05.

**HRMS (ESI)** for  $C_{20}H_{18}N_2O_3Na$   $[M+Na]^+$ : 357.1210, found: 357.1213.

**FTIR** (KBr,  $cm^{-1}$ )

3509.35, 3458.88, 3447.66, 3414.02, 3385.98, 2926.17, 2354.21, 2331.78, 1686.92, 1670.09, 1656.07, 1636.45, 1560.75, 1535.51, 1507.48, 1398.13, 1384.11, 1274.77, 1213.08.

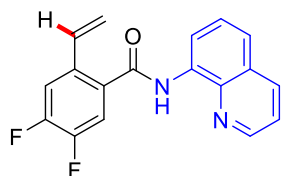

**4,5-Difluoro-N-(quinolin-8-yl)-2-vinylbenzamide (1k)**

Following the general procedure A, **1k** was obtained as a white solid (0.75 g, 82% yield for three steps, m.p. = 144-145

°C).

**<sup>1</sup>H NMR** (500 MHz, CDCl<sub>3</sub>)

δ 10.22 (s, 1H), 8.89 (dd, *J* = 7.0, 2.0 Hz, 1H), 8.78 (dd, *J* = 4.0, 1.5 Hz, 1H), 8.20 (dd, *J* = 8.5, 1.5 Hz, 1H), 7.62 – 7.55 (m, 3H), 7.49 – 7.43 (m, 2H), 7.16 (dd, *J* = 18.0, 11.5 Hz, 1H), 5.75 (d, *J* = 17.5 Hz, 1H), 5.42 (d, *J* = 11.0 Hz, 1H).

**<sup>13</sup>C NMR** (125 MHz, CDCl<sub>3</sub>)

δ 165.21, 151.60 (d, *J*<sub>CF</sub> = 264.4 Hz), 151.49 (d, *J*<sub>CF</sub> = 264.4 Hz), 148.43, 138.57, 136.41, 134.25 (d, *J*<sub>CF</sub> = 1.0 Hz), 134.25, 132.87, 132.00 (d, *J*<sub>CF</sub> = 4.0 Hz), 127.99, 127.36, 122.29, 121.82, 118.18, 117.17 (d, *J*<sub>CF</sub> = 17.5 Hz), 116.78, 115.55 (d, *J*<sub>CF</sub> = 17.9 Hz).

**<sup>19</sup>F NMR** (471 MHz, CDCl<sub>3</sub>)

δ -133.98, -137.52.

**HRMS (ESI)** for C<sub>18</sub>H<sub>12</sub>N<sub>2</sub>OF<sub>2</sub>Na [M+Na]<sup>+</sup>: 333.0810, found: 333.0805.

**FTIR** (KBr, cm<sup>-1</sup>)

3747.66, 3649.53, 3627.10, 3565.42, 3383.18, 2351.40, 1686.92, 1653.27, 1636.45, 1541.12, 1510.28, 1409.35, 1392.52, 1314.02.

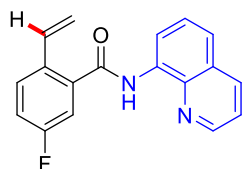

**5-Fluoro-*N*-(quinolin-8-yl)-2-vinylbenzamide (11)**

Following the general procedure A, **11** was obtained as a white solid (0.22 g, 15% yield for three steps, m.p. = 110-111 °C).

**<sup>1</sup>H NMR** (500 MHz, CDCl<sub>3</sub>)

δ 10.23 (s, 1H), 8.92 (dd, *J* = 7.5, 1.0 Hz, 1H), 8.78 (dd, *J* = 4.0, 1.5 Hz, 1H), 8.19 (d, *J* = 10.0 Hz, 1H), 7.64 (dd, *J* = 8.5, 5.5 Hz, 1H), 7.62 – 7.57 (m, 2H), 7.47 (dd, *J* = 8.0, 4.0 Hz, 1H), 7.43 (dd, *J* = 8.5, 2.5 Hz, 1H), 7.22 – 7.13 (m, 2H), 5.74 (d, *J* = 17.5 Hz, 1H), 5.36 (d, *J* = 11.0 Hz, 1H).

**<sup>13</sup>C NMR** (125 MHz, CDCl<sub>3</sub>)

δ 166.14, 161.98 (d, *J*<sub>CF</sub> = 247.5 Hz), 148.39, 138.60, 137.07 (d, *J*<sub>CF</sub>

= 6.5 Hz), 136.37, 134.38, 133.54, 132.74 (d,  $J_{CF}$  = 3.5 Hz), 128.68 (d,  $J_{CF}$  = 7.8 Hz), 127.99, 127.37, 122.19, 121.77, 117.72 (d,  $J_{CF}$  = 21.3 Hz), 117.03, 116.77, 114.64 (d,  $J_{CF}$  = 22.8 Hz).

**$^{19}\text{F}$  NMR** (471 MHz,  $\text{CDCl}_3$ )

$\delta$  -113.32.

**HRMS (ESI)** for  $\text{C}_{18}\text{H}_{13}\text{N}_2\text{OFNa}$   $[\text{M}+\text{Na}]^+$ : 315.0904, found: 315.0907.

**FTIR** (KBr,  $\text{cm}^{-1}$ )

3568.22, 3509.35, 3453.27, 3383.18, 3332.71, 2920.56, 2856.07, 1684.11, 1653.27, 1633.64, 1560.75, 1538.32, 1487.85, 1400.93, 1384.11, 1269.16, 823.36.

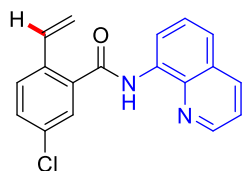

**5-chloro-*N*-(quinolin-8-yl)-2-vinylbenzamide (1m)**

Following the general procedure A, **1m** was obtained as a white solid (0.77 g, 46% yield for three steps, m.p. = 116-117 °C).

**$^1\text{H}$  NMR** (500 MHz,  $\text{CDCl}_3$ )

$\delta$  10.21 (s, 1H), 8.91 (dd,  $J$  = 7.0, 1.5 Hz, 1H), 8.78 (dd,  $J$  = 4.0, 1.5 Hz, 1H), 8.18 (dd,  $J$  = 8.0, 1.5 Hz, 1H), 7.69 (d,  $J$  = 2.0 Hz, 1H), 7.62 – 7.56 (m, 3H), 7.48 – 7.44 (m, 2H), 7.15 (dd,  $J$  = 17.5, 11.0 Hz, 1H), 5.79 (dd,  $J$  = 17.5, 1.0 Hz, 1H), 5.39 (dd,  $J$  = 11.0, 1.0 Hz, 1H).

**$^{13}\text{C}$  NMR** (125 MHz,  $\text{CDCl}_3$ )

$\delta$  166.10, 148.40, 138.58, 136.93, 136.37, 134.94, 134.36, 133.63, 133.46, 130.63, 128.03, 127.99, 127.65, 127.36, 122.22, 121.78, 117.65, 116.80.

**HRMS (ESI)** for  $\text{C}_{18}\text{H}_{13}\text{N}_2\text{OCINa}$   $[\text{M}+\text{Na}]^+$ : 331.0609, found: 331.0612.

**FTIR** (KBr,  $\text{cm}^{-1}$ )

3568.22, 3509.35, 3444.86, 3419.63, 2920.56, 2850.47, 2354.21, 1695.33, 1684.11, 1670.09, 1653.27, 1636.45, 1541.12, 1521.50, 1487.85, 1457.01, 1384.11, 1328.04, 826.17, 792.52.



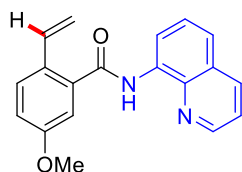

**5-Methoxy-*N*-(quinolin-8-yl)-2-vinylbenzamide (1n)**

Following the general procedure A, **1n** was obtained as a white solid (0.76 g, 50% yield for three steps, m.p. = 159-160 °C).

**<sup>1</sup>H NMR** (500 MHz, CDCl<sub>3</sub>)

δ 10.22 (s, 1H), 8.95 (dd, *J* = 7.0, 1.0 Hz, 1H), 8.77 (dd, *J* = 4.0, 1.5 Hz, 1H), 8.18 (dd, *J* = 8.0, 1.5 Hz, 1H), 7.62 – 7.59 (m, 2H), 7.56 (dd, *J* = 8.5, 1.5 Hz, 1H), 7.45 (dd, *J* = 8.0, 4.0 Hz, 1H), 7.23 (d, *J* = 2.5 Hz, 1H), 7.16 – 7.11 (m, 1H), 7.04 (dd, *J* = 8.5, 2.5 Hz, 1H), 5.69 (dd, *J* = 17.5, 1.0 Hz, 1H), 5.27 (dd, *J* = 11.0, 1.0 Hz, 1H), 3.88 (s, 3H).

**<sup>13</sup>C NMR** (125 MHz, CDCl<sub>3</sub>)

δ 167.40, 159.16, 148.32, 138.64, 136.75, 136.31, 134.61, 133.88, 128.99, 127.99, 127.96, 127.39, 121.96, 121.70, 116.74, 116.67, 115.21, 112.48, 55.57.

**HRMS (ESI)** for C<sub>19</sub>H<sub>17</sub>N<sub>2</sub>O<sub>2</sub> [M+H]<sup>+</sup>: 305.1285, found: 305.1304.

**FTIR** (KBr, cm<sup>-1</sup>)

3571.03, 3475.70, 3458.88, 3419.63, 1670.09, 1636.45, 1616.82, 1541.12, 1521.50, 1400.93, 1381.31, 1328.04, 826.17, 792.52, 615.89.

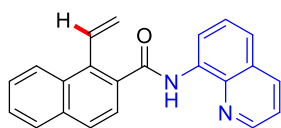

***N*-(Quinolin-8-yl)-1-vinyl-2-naphthamide (1o)**

Following the general procedure A, **1o** was obtained as a kelly solid (0.8 g, 49% yield for three steps, m.p. = 114-115 °C).

**<sup>1</sup>H NMR** (500 MHz, CDCl<sub>3</sub>)

δ 10.27 (s, 1H), 8.96 (d, *J* = 7.5 Hz, 1H), 8.74 (dd, *J* = 4.0, 1.5 Hz, 1H), 8.27 – 8.24 (m, 1H), 8.17 (dd, *J* = 8.0, 1.5 Hz, 1H), 7.90 (dd, *J* = 9.0, 3.0 Hz, 2H), 7.81 (d, *J* = 8.5 Hz, 1H), 7.63 – 7.54 (m, 4H), 7.45 – 7.38 (m, 2H), 5.72 (dd, *J* = 8.5, 1.5 Hz, 1H), 5.69 (dd, *J* = 14.5, 1.5 Hz, 1H).

**<sup>13</sup>C NMR** (125 MHz, CDCl<sub>3</sub>)

δ 168.47, 148.24, 138.64, 136.30, 134.95, 134.82, 134.18, 133.25, 133.02, 131.46, 128.31, 128.02, 128.00, 127.48, 127.04, 126.77, 126.25, 124.77, 122.79, 121.77, 121.64, 116.55.

**HRMS (ESI)** for C<sub>22</sub>H<sub>16</sub>N<sub>2</sub>ONa [M+Na]<sup>+</sup>: 347.1155, found: 347.1150.

**FTIR** (KBr, cm<sup>-1</sup>)

3624.30, 3571.03, 3475.70, 3456.07, 3447.66, 3422.43, 1667.29, 1656.07, 1633.64, 1622.43, 1616.82, 1560.75, 1538.32, 1507.48, 1454.21, 1406.54, 1384.11.

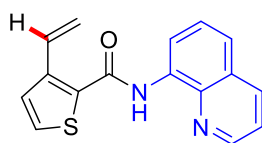

***N*-(Quinolin-8-yl)-3-vinylthiophene-2-carboxamide (1p)**

Following the general procedure A, **1p** was obtained as a white solid (0.5 g, 36% yield for three steps, m.p. = 93-94 °C).

**<sup>1</sup>H NMR** (500 MHz, CDCl<sub>3</sub>)

δ 10.45 (s, 1H), 8.85 – 8.81 (m, 2H), 8.16 (dd, *J* = 8.5, 1.5 Hz, 1H), 7.58 – 7.52 (m, 3H), 7.45 (dd, *J* = 8.0, 4.0 Hz, 1H), 7.40 (d, *J* = 5.0 Hz, 1H), 7.33 (d, *J* = 5.0 Hz, 1H), 5.79 (dd, *J* = 17.5, 1.0 Hz, 1H), 5.51 (dd, *J* = 11.0, 1.0 Hz, 1H).

**<sup>13</sup>C NMR** (125 MHz, CDCl<sub>3</sub>)

δ 160.88, 148.36, 142.49, 138.65, 136.33, 134.59, 132.83, 130.06, 127.98, 127.71, 127.41, 127.25, 121.79, 121.71, 118.27, 116.64.

**HRMS (ESI)** for C<sub>16</sub>H<sub>12</sub>N<sub>2</sub>OSNa [M+Na]<sup>+</sup>: 303.0563, found: 303.0563.

**FTIR** (KBr, cm<sup>-1</sup>)

3571.03, 3478.50, 3444.86, 3419.63, 2923.36, 1670.09, 1664.49, 1653.27, 1636.45, 1619.63, 1541.12, 1510.28, 1457.01, 1400.93.

## Procedure for **1w** Synthesis

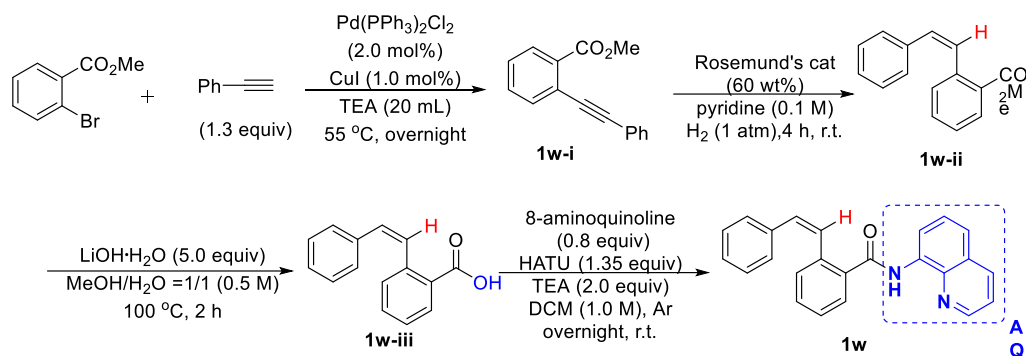

**Alkynylation Reaction**<sup>[3]</sup>: A solution of Pd(PPh<sub>3</sub>)<sub>2</sub>Cl<sub>2</sub> (1.0 mol%), CuI (1.0 mol%), methyl 2-bromobenzoate (5.00 mmol) and ethynylbenzene (6.00 mmol) in TEA (0.4 M) was stirred at 55 °C overnight, then cooled to rt and diluted with H<sub>2</sub>O (20 mL) followed by extraction with EtOAc (30 mL × 3). The solvent was removed in vacuo, and the crude product was purified by silica gel chromatography (SiO<sub>2</sub>, PE / EA) to obtain the corresponding product.

**Hydrogenation Reaction**: Following a slight modification from a previously reported procedure, a solution of alkyne (**1w-i**) (3.9 mmol, 1.0 equiv) in pyridine (39 mL) was vacuum purged three times, backfilling with N<sub>2</sub>. Rosemund's catalyst (5% Pd on BaSO<sub>4</sub>, 0.521 g) was added and the solution was vacuum purged once more, backfilling with H<sub>2</sub>. The solution was allowed to stir at room temperature for 4 h until reaction completion (monitored by TLC). The reaction was vacuum purged and backfilled with N<sub>2</sub>, upon which the reaction was filtered through Celite, rinsing with EtOAc (200 mL). The organic solution was concentrated in vacuo to give an orange oil, which was dissolved in 50 mL EtOAc. The organic solution was washed with HCl (2 M, 30 mL × 2), water (50 mL), and brine (50 mL). The organic layer was then dried with Na<sub>2</sub>SO<sub>4</sub> and concentrated in vacuo to afford the crude olefin. Purification by column chromatography (PE/EA) afforded olefin (**1w-ii**)

**Ester Hydrolysis and AQ Amide Preparation** were performed according to the general procedure A.

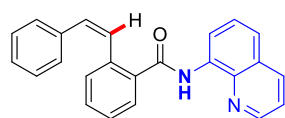

(*Z*)-*N*-(quinolin-8-yl)-2-styrylbenzamide (**1w**)

Following the procedure, **1w** was obtained as a colorless oil (0.39 g, 22% yield for four steps).

**<sup>1</sup>H NMR** (500 MHz, CDCl<sub>3</sub>)

δ 10.57 (s, 1H), 8.92 (dd, *J* = 7.5, 1.5 Hz, 1H), 8.56 (dd, *J* = 4.0, 1.5 Hz, 1H), 8.14 (dd, *J* = 8.0, 1.5 Hz, 1H), 7.91 (dd, *J* = 7.5, 1.0 Hz, 1H), 7.57 (d, *J* = 8.0 Hz, 1H), 7.52 (dd, *J* = 8.5, 1.5 Hz, 1H), 7.41 – 7.37 (m, 2H), 7.34 – 7.29 (m, 2H), 7.24 – 7.23 (m, 2H), 7.20 – 7.16 (m, 2H), 7.15 – 7.12 (m, 1H), 6.98 (d, *J* = 12.0 Hz, 1H), 6.74 (d, *J* = 12.0 Hz, 1H).

**<sup>13</sup>C NMR** (125 MHz, CDCl<sub>3</sub>)

δ 165.92, 147.03, 137.68, 135.58, 135.42, 135.14, 134.76, 133.81, 131.17, 129.61, 129.59, 128.17, 127.57, 127.56, 127.11, 126.88, 126.54, 126.39, 126.17, 120.65, 120.55, 115.49.

**HRMS (ESI)** for C<sub>24</sub>H<sub>18</sub>N<sub>2</sub>ONa [M+Na]<sup>+</sup>: 373.1311, found: 373.1304.

**FTIR** (KBr, cm<sup>-1</sup>)

3854.21, 3744.86, 3649.53, 3624.30, 3562.62, 2348.60, 1734.58, 1686.92, 1656.07, 1560.75, 1541.12, 1507.48, 1459.81, 1398.13, 1022.43, 666.36.

### Procedure for **1x** Synthesis

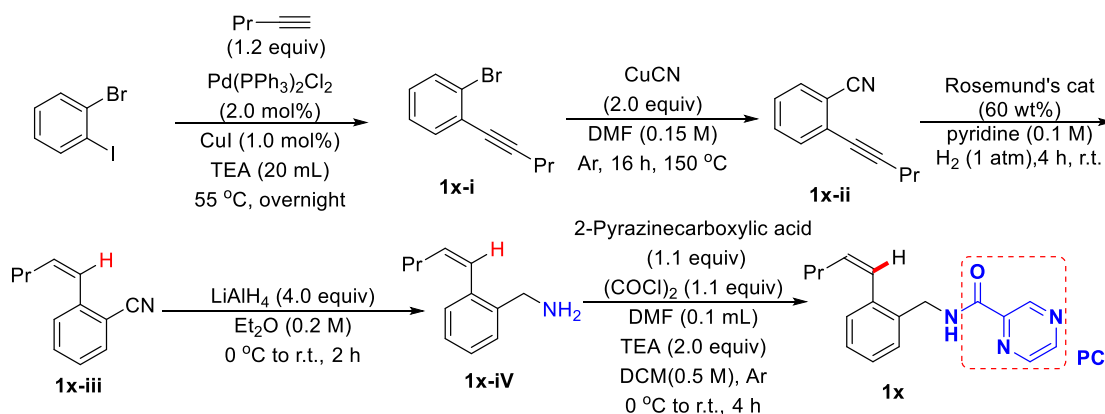

**Alkynylation Reaction and Hydrogenation Reaction** was following the Procedure for **1w** Synthesis.

**Cyanation Reaction**<sup>[4]</sup>: To a solution of CuCN (2.0 equiv) in DMF (0.15 M) was added 1-bromo-2-(pent-1-yn-1-yl)benzene (**1x-i**) at 150 °C and stirred for 16 h. then cooled to rt and diluted with H<sub>2</sub>O (20 mL) followed by extraction with EtOAc (30 mL x 3). Combined the organic layers and dried over Na<sub>2</sub>SO<sub>4</sub>. The solvent was removed in vacuo, and the resulting residue was purified by silica gel column chromatography

(PE / EA).

**Benzonitrile Reduction and PC Amide Preparation** was following the general procedure **B**.

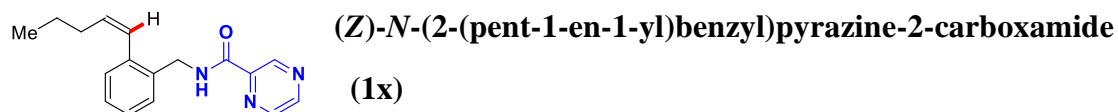

Following the **1w** procedure and the general procedure **B**, **1x** was obtained as a white solid (1.08g, 77% yield for five steps, m.p. = 75-76 °C).

**<sup>1</sup>H NMR** (500 MHz, CDCl<sub>3</sub>)

δ 9.43 (d, *J* = 1.5 Hz, 1H), 8.73 (d, *J* = 2.5 Hz, 1H), 8.47 (dd, *J* = 2.5, 1.5 Hz, 1H), 7.99 (s, 1H), 7.37 (dd, *J* = 7.5, 1.5 Hz, 1H), 7.29 – 7.25 (m, 2H), 7.23 (dd, *J* = 7.0, 1.5 Hz, 1H), 6.55 (d, *J* = 11.5 Hz, 1H), 5.83 – 5.78 (m, 1H), 4.65 (d, *J* = 6.0 Hz, 2H), 2.13 – 2.08 (m, 2H), 1.43 – 1.36 (m, 2H), 0.86 (t, *J* = 7.5 Hz, 3H).

**<sup>13</sup>C NMR** (125 MHz, CDCl<sub>3</sub>)

δ 161.60, 146.20, 143.47, 143.44, 141.42, 135.90, 134.34, 133.60, 128.85, 127.71, 126.48, 126.22, 125.64, 40.68, 29.43, 21.78, 12.75.

**HRMS (ESI)** for C<sub>17</sub>H<sub>19</sub>N<sub>3</sub>ONa [M+Na]<sup>+</sup>: 304.1420, found: 304.1414.

**FTIR** (KBr, cm<sup>-1</sup>)

3851.40, 3747.66, 3627.10, 3565.42, 3444.86, 3416.82, 1653.27, 1639.2, 1557.94, 1543.93, 1504.67, 1406.54, 1384.11, 1022.43.

## 2.2 General Procedure B for Substrate Synthesis

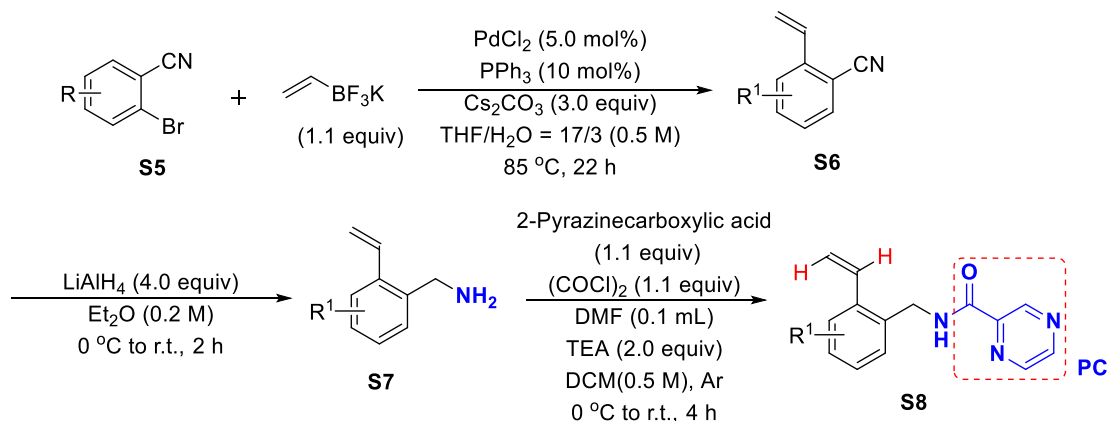

**Heck Reaction:** A solution of potassium vinyltrifluoroborate (1.1 equiv),  $\text{Pd}(\text{OAc})_2$  (5.0 mol%),  $\text{PPh}_3$  (10.0 mol%),  $\text{Cs}_2\text{CO}_3$  (3.0 equiv), and substituted benzonitrile (S5) (5.00 mmol) in THF/H<sub>2</sub>O (17:3) (0.5 M) was heated at 85 °C under N<sub>2</sub> atmosphere in a sealed tube. The reaction mixture was stirred at 85 °C for 22 h, then cooled to rt and diluted with H<sub>2</sub>O (10 mL) followed by extraction with EtOAc (30 mL  $\times$  3). The solvent was removed in vacuo, and the crude product was purified by silica gel chromatography ( $\text{SiO}_2$ , PE / EA = 98 / 2) to obtain the corresponding product (S6).

**Benzonitrile Reduction**<sup>[5]</sup>: To a solution of substituted benzylidene nitrile (S6) in  $\text{Et}_2\text{O}$  (0.2 M) was added dropwise  $\text{LiAlH}_4$  (4.0 equiv) over 30 min at 0 °C and stirred for 2 h at r.t. 4 M NaOH was added slowly to until a clear solution was obtained. The  $\text{Et}_2\text{O}$  layer was separated and the aqueous phase was extracted with  $\text{Et}_2\text{O}$  (20 mL  $\times$  3). Combined the organic layers and dried over  $\text{Na}_2\text{SO}_4$ . After removing the solvent under reduced pressure, the residue was purified by column chromatography on silica gel with EtOAc and the resulting amine (S7) was used in the next step without further purification.

**PC Amide Preparation**<sup>[6]</sup>: 2-Pyrazinecarboxylic acid (1.1 equiv) was dissolved in dry DCM (0.5 M) by adding 2 to 3 drops of dry DMF. To this reaction mixture oxalyl chloride (1.1 equiv.) was added at 0 °C slowly and the resultant reaction mixture was stirred at rt for 2 h under a nitrogen atm. After this period, the reaction mixture was concentrated in vacuum to remove excess oxalyl chloride and solvent. The resultant acid chloride was dissolved in DCM (25 mL) and this reaction mixture was added to a separate flask which contained the corresponding amine (S7), TEA (2.0 equiv) in

DCM (5 mL) at 0 °C and the resultant reaction mixture was stirred at rt for 4 h under a nitrogen atm. After this period, the reaction mixture was diluted with DCM and then washed with water followed by saturated aqueous NaHCO<sub>3</sub> solution and the organic layer was washed with brine and dried over anhydrous Na<sub>2</sub>SO<sub>4</sub>. The solvent was removed in vacuo, and the resulting residue was purified by silica gel column chromatography (PE / EA = 2 / 1).

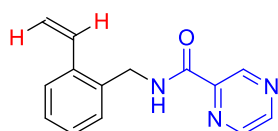

***N*-(2-vinylbenzyl)pyrazine-2-carboxamide (4a)**

Following the general procedure B, **4a** was obtained as a yellow solid (0.67 g, 56% yield for three steps for three steps, m.p.= 86-87 °C).

**<sup>1</sup>H NMR** (500 MHz, CDCl<sub>3</sub>)

δ 9.45 (s, 1H), 8.74 (t, *J* = 3.0 Hz, 1H), 8.48 (dd, *J* = 2.5, 1.5 Hz, 1H), 7.95 (s, 1H), 7.55 (dd, *J* = 7.5, 1.0 Hz, 1H), 7.36 – 7.28 (m, 3H), 7.02 (dd, *J* = 17.5, 11.0 Hz, 1H), 5.69 (dd, *J* = 17.0, 1.0 Hz, 1H), 5.37 (dd, *J* = 11.0, 1.0 Hz, 1H), 4.74 (d, *J* = 5.5 Hz, 2H).

**<sup>13</sup>C NMR** (125 MHz, CDCl<sub>3</sub>)

δ 161.55, 146.27, 143.47, 143.31, 141.49, 136.08, 133.30, 132.60, 128.33, 127.28, 127.08, 125.26, 116.04, 40.45.

**HRMS (ESI)** for C<sub>14</sub>H<sub>14</sub>N<sub>3</sub>O [M+H]<sup>+</sup>: 240.1131, found: 240.1139.

**FTIR** (KBr, cm<sup>-1</sup>)

3568.22, 3472.90, 3456.07, 3450.47, 3422.43, 2357.01, 1689.72, 1664.49, 1653.27, 1642.06, 1566.36, 1541.12, 1507.48, 1476.64, 1406.54, 1381.31.

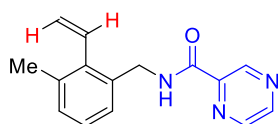

***N*-(3-methyl-2-vinylbenzyl)pyrazine-2-carboxamide (4g)**

Following the general procedure B, **4g** was obtained as a white solid (0.83 g, 66% yield for three steps, m.p. = 109-110 °C).

**<sup>1</sup>H NMR** (500 MHz, CDCl<sub>3</sub>)

δ 9.44 (d, *J* = 9.0 Hz, 1H), 8.73 (s, 1H), 8.48 (s, 1H), 8.01 (s, 1H),

7.25 – 7.24 (m, 1H), 7.16 (d,  $J = 3.5$  Hz, 1H), 7.11 (dd,  $J = 14.0, 6.5$  Hz, 1H), 6.79 (dd,  $J = 17.5, 10.5$  Hz, 1H), 5.62 (dd,  $J = 11.5, 1.5$  Hz, 1H), 5.32 (dd,  $J = 18.0, 1.5$  Hz, 1H), 4.70 (d,  $J = 6.0$  Hz, 2H), 2.31 (s, 3H).

**$^{13}\text{C}$  NMR** (125 MHz,  $\text{CDCl}_3$ )

$\delta$  161.56, 146.24, 146.19, 143.48, 141.48, 140.14, 136.98, 135.79, 135.47, 133.95, 133.79, 133.19, 129.28, 128.56, 126.22, 125.46, 125.02, 119.64, 40.87, 19.66.

**HRMS (ESI)** for  $\text{C}_{15}\text{H}_{15}\text{N}_3\text{ONa}$   $[\text{M}+\text{Na}]^+$ : 276.1107, found: 276.1102.

**FTIR** (KBr,  $\text{cm}^{-1}$ )

3649.53, 3624.30, 3568.22, 3416.82, 3355.14, 2926.17, 2351.40, 1667.29, 1642.06, 1560.75, 1541.12, 1513.08, 1471.03, 1406.54, 1381.31, 1022.43.

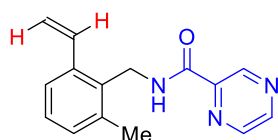

***N*-(2-methyl-6-vinylbenzyl)pyrazine-2-carboxamide (4h)**

Following the general procedure B, **4h** was obtained as a yellow solid (0.39 g, 31% yield for three steps, m.p. = 107-108 °C).

**$^1\text{H}$  NMR** (500 MHz,  $\text{CDCl}_3$ )

$\delta$  9.43 (d,  $J = 1.5$  Hz, 1H), 8.70 (d,  $J = 2.5$  Hz, 1H), 8.44 (dd,  $J = 2.5, 1.5$  Hz, 1H), 7.76 (s, 1H), 7.38 (d,  $J = 8.0$  Hz, 1H), 7.23 (t,  $J = 7.5$  Hz, 1H), 7.15 (d,  $J = 7.5$  Hz, 1H), 7.09 (dd,  $J = 6.5, 4.0$  Hz, 1H), 5.66 (dd,  $J = 17.0, 1.0$  Hz, 1H), 5.36 (dd,  $J = 11.0, 1.5$  Hz, 1H), 4.75 (d,  $J = 5.0$  Hz, 2H), 2.44 (s, 3H).

**$^{13}\text{C}$  NMR** (125 MHz,  $\text{CDCl}_3$ )

$\delta$  161.56, 146.19, 143.34, 143.29, 141.45, 137.39, 136.54, 133.49, 131.31, 129.16, 127.24, 123.46, 116.44, 36.63, 18.77.

**HRMS (ESI)** for  $\text{C}_{15}\text{H}_{15}\text{N}_3\text{ONa}$   $[\text{M}+\text{Na}]^+$ : 276.1107, found: 276.1105.

**FTIR** (KBr,  $\text{cm}^{-1}$ )

3565.42, 3512.15, 3481.31, 3453.27, 3419.63, 2926.17, 1686.92, 1675.70, 1667.29, 1653.27, 1642.06, 1622.43, 1557.94, 1543.93,



1507.48, 1457.01, 1403.74, 1381.31.

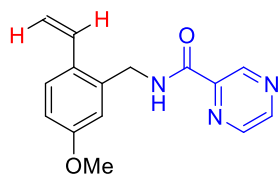

***N*-(5-methoxy-2-vinylbenzyl)pyrazine-2-carboxamide (4i)**

Following the general procedure B, **4i** was obtained as a white solid (0.96g, 71% yield for three steps, m.p. = 73-74 °C).

**<sup>1</sup>H NMR** (500 MHz, CDCl<sub>3</sub>)

δ 9.44 (dd, *J* = 5.5, 1.5 Hz, 1H), 8.74 (d, *J* = 2.5 Hz, 1H), 8.49 (dd, *J* = 2.5, 1.5 Hz, 1H), 7.96 (s, 1H), 7.50 (d, *J* = 8.5 Hz, 1H), 6.94 (dd, *J* = 17.5, 11.0 Hz, 1H), 6.88 (d, *J* = 2.5 Hz, 1H), 6.86 (dd, *J* = 8.5, 2.5 Hz, 1H), 5.59 (dd, *J* = 17.5, 1.5 Hz, 1H), 5.26 (dd, *J* = 11.0, 1.0 Hz, 1H), 4.71 (d, *J* = 5.5 Hz, 2H), 3.81 (d, *J* = 3.5 Hz, 3H).

**<sup>13</sup>C NMR** (125 MHz, CDCl<sub>3</sub>)

δ 162.60, 159.43, 147.31, 144.49, 144.32, 142.54, 135.75, 132.96, 129.61, 127.51, 115.06, 114.68, 113.58, 55.36, 41.50.

**HRMS (ESI)** for C<sub>15</sub>H<sub>15</sub>N<sub>3</sub>O<sub>2</sub>Na [M+ Na]<sup>+</sup>: 292.1056, found: 292.1058.

**FTIR** (KBr, cm<sup>-1</sup>)

3453.27, 3442.06, 3422.43, 3405.61, 3388.79, 2928.97, 1684.11, 1667.29, 1605.61, 1521.50, 1510.28, 1465.42, 1400.93, 1300.00, 1257.94, 1165.42, 1022.43.

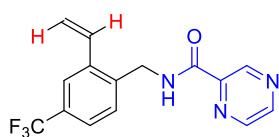

***N*-(4-(trifluoromethyl)-2-vinylbenzyl)pyrazine-2-carboxamide (4j)**

Following the general procedure B, **4j** was obtained as a white solid (0.72 g, 47% yield for three steps, m.p. = 87-88 °C).

**<sup>1</sup>H NMR** (500 MHz, CDCl<sub>3</sub>)

δ 9.44 (s, 1H), 8.76 (d, *J* = 2.5 Hz, 1H), 8.51 (d, *J* = 2.0 Hz, 1H), 8.06 (s, 1H), 7.76 (s, 1H), 7.52 (d, *J* = 8.0 Hz, 1H), 7.46 (d, *J* = 9.0 Hz, 1H), 7.03 (dd, *J* = 17.5, 11.0 Hz, 1H), 5.77 (d, *J* = 17.5 Hz, 1H), 5.49 (d, *J* = 11.0 Hz, 1H), 4.78 (d, *J* = 6.0 Hz, 2H).

**<sup>13</sup>C NMR** (125 MHz, CDCl<sub>3</sub>)

$\delta$  161.79, 146.50, 143.51, 141.55, 137.14 (d,  $J_{CF}$  = 8.8 Hz), 136.69, 131.58, 129.24 (q,  $J_{CF}$  = 32.1 Hz), 128.33, 127.85, 123.56 (q,  $J_{CF}$  = 37.5 Hz), 122.94 (q,  $J_{CF}$  = 270.5 Hz), 122.25 (q,  $J_{CF}$  = 3.9 Hz), 117.87, 39.95.

**$^{19}\text{F}$  NMR** (471 MHz,  $\text{CDCl}_3$ )

$\delta$  -62.71.

**HRMS (ESI)** for  $\text{C}_{15}\text{H}_{12}\text{N}_3\text{OF}_3\text{Na}$  [ $\text{M} + \text{Na}$ ] $^{+}$ : 330.0825, found: 330.0823.

**FTIR** (KBr,  $\text{cm}^{-1}$ )

3568.22, 3512.15, 3444.86, 3383.18, 2959.81, 2928.97, 2357.01, 2326.17, 1681.31, 1667.29, 1656.07, 1622.43, 1541.12, 1507.48, 1476.64, 1398.13, 1330.84, 1128.97, 1019.63.

## 2.3 General Procedure C for Substrate Synthesis

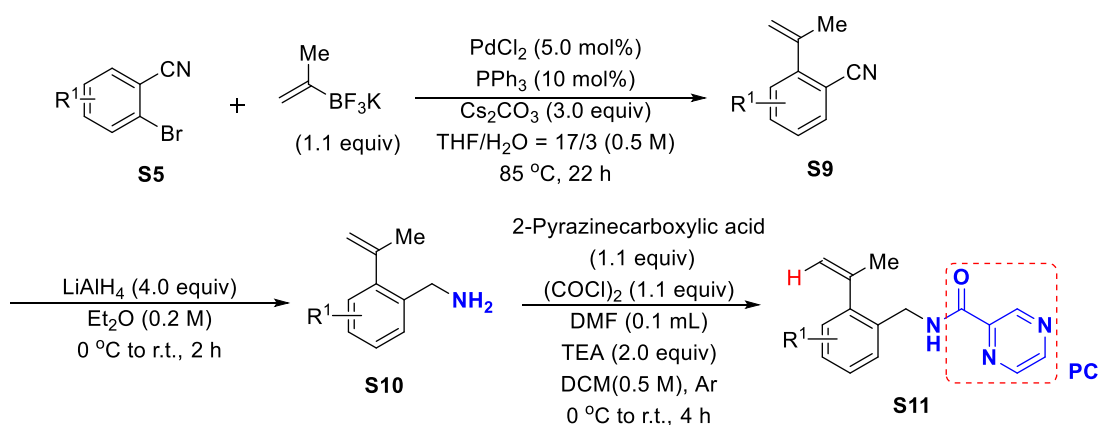

**Heck Reaction:** A solution of potassium isopropenyl trifluoroborate (1.1 equiv),  $\text{PdCl}_2$  (5.0 mol%),  $\text{PPh}_3$  (10.0 mol%),  $\text{Cs}_2\text{CO}_3$  (3.0 equiv), and substituted benzonitrile (**S5**) (5.0 mmol) in  $\text{THF}/\text{H}_2\text{O}$  (17:3) (0.5 M) was heated at  $85^\circ\text{C}$  under  $\text{N}_2$  atmosphere in a sealed tube. The reaction mixture was stirred at  $85^\circ\text{C}$  for 22 h, then cooled to rt and diluted with  $\text{H}_2\text{O}$  (10 mL) followed by extraction with EtOAc (30 mL  $\times$  3). The solvent was removed in vacuo, and the crud product was purified by silica gel chromatography ( $\text{SiO}_2$ , PE / EA = 98 / 2) to obtain the corresponding product (**S9**).

**Benzonitrile Reduction:** To a solution of substituted benzonitrile (**S9**) in  $\text{Et}_2\text{O}$  (0.2 M)

was added dropwise  $\text{LiAlH}_4$  (4.0 equiv) over 30 min at  $0^\circ\text{C}$  and stirred for 2 h at r.t. 4 M NaOH was added slowly to until a clear solution was obtained. The  $\text{Et}_2\text{O}$  layer was separated and the aqueous phase was extracted with  $\text{Et}_2\text{O}$  ( $20\text{ mL} \times 3$ ). Combined the organic layers and dried over  $\text{Na}_2\text{SO}_4$ . After removing the solvent under reduced pressure, the residue was purified by column chromatography on silica gel with EtOAc and the resulting amine (**S10**) was used in the next step without further purification.

**PC Amide Preparation:** 2-Pyrazinecarboxylic acid (1.1 equiv) was dissolved in dry DCM (0.5 M) by adding 2 to 3 drops of dry DMF. To this reaction mixture oxalyl chloride (1.1 equiv.) was added at  $0^\circ\text{C}$  slowly and the resultant reaction mixture was stirred at rt for 2 h under a nitrogen atm. After this period, the reaction mixture was concentrated in vacuum to remove excess oxalyl chloride and solvent. The resultant acid chloride was dissolved in DCM (0.5 M) and this reaction mixture was added to a separate flask which contained the corresponding amine (**S10**),  $\text{Et}_3\text{N}$  (2.0 equiv) in DCM (5 mL) at  $0^\circ\text{C}$  and the resultant reaction mixture was stirred at rt for 4 h under a nitrogen atm. After this period, the reaction mixture was diluted with DCM and then washed with water followed by saturated aqueous  $\text{NaHCO}_3$  solution and the organic layer was washed with brine and dried over anhydrous  $\text{Na}_2\text{SO}_4$ . The solvent was removed in vacuo, and the resulting residue was purified by silica gel column chromatography (PE / EA = 2 / 1).

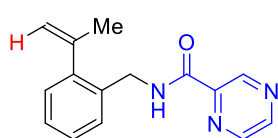

***N*-(2-(prop-1-en-2-yl)benzyl)pyrazine-2-carboxamide (**6a**)**

Following the general procedure C, **6a** was obtained as a white solid (0.78 g, 62% yield for three steps, m.p. =  $95-96^\circ\text{C}$ ).

**$^1\text{H}$  NMR** (500 MHz,  $\text{CDCl}_3$ )

$\delta$  9.44 (s, 1H), 8.74 (d,  $J = 2.5$  Hz, 1H), 8.50 – 8.49 (m, 1H), 8.03 (s, 1H), 7.41 – 7.39 (m, 1H), 7.28 – 7.26 (m, 2H), 7.20 – 7.18 (m, 1H), 5.28 (s, 1H), 4.93 (s, 1H), 4.70 (d,  $J = 6.0$  Hz, 2H), 2.09 (s, 3H).

**$^{13}\text{C}$  NMR** (125 MHz,  $\text{CDCl}_3$ )

$\delta$  162.68, 147.25, 144.64, 144.49, 143.78, 142.53, 134.07, 128.93,  
128.33, 127.61, 127.40, 115.82, 41.35, 25.13.

**HRMS (ESI)** for  $C_{15}H_{15}N_3ONa$   $[M+Na]^+$ : 276.1107, found: 276.1099.

**FTIR** (KBr,  $cm^{-1}$ )

3472.90, 3461.68, 3419.63, 3385.98, 1667.29, 1636.45, 1619.63,  
1529.91, 1406.54, 1294.39, 1025.23, 775.70.

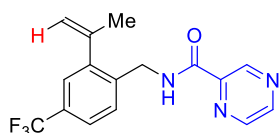

***N*-(2-(prop-1-en-2-yl)-4-(trifluoromethyl)benzyl)pyrazine-2-carboxamide (6i)**

Following the general procedure C, **6i** was obtained as a yellow solid (1.0 g, 63% yield for three steps, m.p. = 88-89 °C).

**<sup>1</sup>H NMR** (500 MHz,  $CDCl_3$ )

$\delta$  9.41 (d,  $J$  = 1.5 Hz, 1H), 8.74 (d,  $J$  = 2.5 Hz, 1H), 8.49 (dd,  $J$  = 2.5, 1.5 Hz, 1H), 8.14 (s, 1H), 7.52 – 7.46 (m, 2H), 7.41 (s, 1H), 5.35 – 5.33 (m, 1H), 4.96 (m, 1H), 4.72 (d,  $J$  = 6.0 Hz, 2H), 2.09 (s, 3H).

**<sup>13</sup>C NMR** (125 MHz,  $CDCl_3$ )

$\delta$  161.93, 146.44, 143.47, 143.16 (d,  $J$  = 6.5 Hz), 142.44, 141.57, 137.32 (d,  $J$  = 1.0 Hz), 128.75 (q,  $J$  = 32.3 Hz), 128.00, 124.13 (q,  $J$  = 37.5 Hz), 123.10 (q,  $J$  = 37.5 Hz), 122.95 (q,  $J$  = 270.6 Hz), 115.92, 112.26, 39.84, 23.77.

**<sup>19</sup>F NMR** (471 MHz,  $CDCl_3$ )

$\delta$  -62.57.

**HRMS (ESI)** for  $C_{16}H_{15}N_3OF$   $[M+H]^+$ : 322.1162, found: 322.1139.

**FTIR** (KBr,  $cm^{-1}$ )

3419.63, 3405.61, 2968.22, 2923.36, 1684.11, 1675.70, 1633.64,  
1616.82, 1560.75, 1541.12, 1524.30, 1403.74, 1342.06, 1291.59,  
1271.96, 1120.56, 1095.33, 1028.04, 901.87.

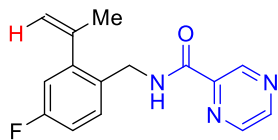

***N*-(2-(prop-1-en-2-yl)-4-(fluoromethyl)benzyl)pyrazine-2-carboxamide (**6j**)**

Following the general procedure C, **6j** was obtained as a yellow oil (0.76 g, 56% yield for three steps, m.p. = 105-106 °C).

**<sup>1</sup>H NMR** (500 MHz, CDCl<sub>3</sub>)

δ 9.43 (s, 1H), 8.75 (s, 1H), 8.50 (d, *J* = 1.5 Hz, 1H), 8.02 (s, 1H), 7.38 (dd, *J* = 8.5, 6.0 Hz, 1H), 6.97 – 6.93 (m, 1H), 6.89 (dd, *J* = 9.5, 2.5 Hz, 1H), 5.30 (d, *J* = 1.5 Hz, 1H), 4.95 (s, 1H), 4.65 (d, *J* = 6.0 Hz, 2H), 2.08 (s, 3H).

**<sup>13</sup>C NMR** (125 MHz, CDCl<sub>3</sub>)

δ 161.67, 160.90 (d, *J* = 245.5 Hz), 146.30, 144.75 (d, *J* = 32.3 Hz), 143.46, 143.34, 142.63 (d, *J* = 1.4 Hz), 141.51, 129.77 (d, *J* = 8.4 Hz), 128.98 (d, *J* = 3.1 Hz), 115.36, 114.09 (d, *J* = 21.1 Hz), 113.17 (d, *J* = 21.0 Hz), 39.67, 23.81.

**<sup>19</sup>F NMR** (471 MHz, CDCl<sub>3</sub>)

δ -114.86.

**HRMS (ESI)** for C<sub>15</sub>H<sub>14</sub>N<sub>3</sub>OF<sub>3</sub>Na [M+ Na]<sup>+</sup>: 294.1013, found: 294.1010.

**FTIR** (KBr, cm<sup>-1</sup>)

3419.63, 3405.61, 3388.79, 2968.22, 2923.36, 2357.01, 1695.33, 1684.11, 1675.70, 1560.75, 1541.12, 1524.30, 1403.74, 1342.06, 1291.59, 1271.96, 1171.03, 1120.56, 1095.33, 1028.04, 901.87.

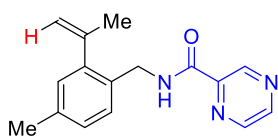

***N*-(4-methyl-2-(prop-1-en-2-yl)benzyl)pyrazine-2-carboxamide (**6k**)**

Following the general procedure C, **6k** was obtained as a white solid (0.99 g, 74% yield for three steps, m.p. = 97-98 °C).

**<sup>1</sup>H NMR** (500 MHz, CDCl<sub>3</sub>)

δ 9.36 (d, *J* = 1.5 Hz, 1H), 8.66 (d, *J* = 2.5 Hz, 1H), 8.41 (dd, *J* = 2.5, 1.5 Hz, 1H), 7.92 (s, 1H), 7.22 (d, *J* = 8.0 Hz, 1H), 7.01 (dd, *J* = 4.0, 1.0 Hz, 1H), 6.93 (d, *J* = 1.0 Hz, 1H), 5.20 – 5.18 (m, 1H), 4.84 (dd, *J* = 2.0, 1.0 Hz, 1H), 4.58 (d, *J* = 6.0 Hz, 2H), 2.27 (s, 3H),

2.01 (s, 3H).

**<sup>13</sup>C NMR** (125 MHz, CDCl<sub>3</sub>)

δ 162.60, 147.20, 144.76, 144.53, 144.47, 143.71, 142.51, 137.35, 131.06, 129.09, 128.96, 128.11, 115.59, 41.15, 25.15, 21.06.

**HRMS (ESI)** for C<sub>16</sub>H<sub>17</sub>N<sub>3</sub>ONa [M+Na]<sup>+</sup>: 290.1264, found: 290.1274.

**FTIR** (KBr, cm<sup>-1</sup>)

3461.68, 3444.86, 3425.23, 3405.61, 2923.36, 2348.60, 1675.70, 1636.45, 1516.82, 1529.91, 1406.54, 1300.00, 1058.88, 1025.23, 994.39.

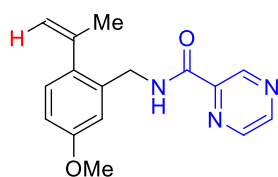

***N*-(5-methoxy-2-(prop-1-en-2-yl)benzyl)pyrazine-2-carboxamide (6l)**

Following the general procedure C, **6l** was obtained as a yellow solid (1.1 g, 77% yield for three steps, m.p. = 78-79 °C).

**<sup>1</sup>H NMR** (500 MHz, CDCl<sub>3</sub>)

δ 9.43 (d, *J* = 1.5 Hz, 1H), 8.74 (d, *J* = 2.5 Hz, 1H), 8.50 (dd, *J* = 2.5, 1.5 Hz, 1H), 8.04 (s, 1H), 7.12 (d, *J* = 8.5 Hz, 1H), 6.94 (d, *J* = 2.5 Hz, 1H), 6.82 (dd, *J* = 8.5, 2.5 Hz, 1H), 5.27 – 5.25 (m, 1H), 4.90 (s, 1H), 4.67 (d, *J* = 6.0 Hz, 2H), 3.79 (s, 3H), 2.07 (s, 3H).

**<sup>13</sup>C NMR** (125 MHz, CDCl<sub>3</sub>)

δ 162.70, 158.71, 147.26, 144.49, 144.46, 144.27, 142.54, 136.15, 135.50, 129.43, 115.87, 114.28, 112.89, 55.33, 41.48, 25.30.

**HRMS (ESI)** for C<sub>16</sub>H<sub>17</sub>N<sub>3</sub>O<sub>2</sub>Na [M+Na]<sup>+</sup>: 306.1213, found: 306.1210.

**FTIR** (KBr, cm<sup>-1</sup>)

3442.06, 3416.82, 3405.61, 3383.18, 1695.33, 1684.11, 1653.27, 1633.64, 1616.82, 1577.57, 1560.75, 1538.32, 1510.28, 1462.62, 1400.93, 1389.72, 1285.98, 1019.63.

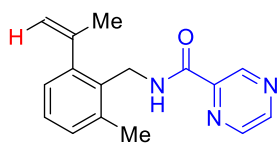

***N*-(2-methyl-6-(prop-1-en-2-yl)benzyl)pyrazine-2-carboxamide (**6m**)**

Following the general procedure C, **6m** was obtained as a yellow solid (0.81 g, 60% yield for three steps, m.p. = 97-98 °C).

**<sup>1</sup>H NMR** (500 MHz, CDCl<sub>3</sub>)

δ 9.43 (d, *J* = 1.5 Hz, 1H), 8.72 (d, *J* = 2.5 Hz, 1H), 8.46 (dd, *J* = 2.5, 1.5 Hz, 1H), 7.74 (s, 1H), 7.21 (t, *J* = 7.5 Hz, 1H), 7.14 (d, *J* = 7.5 Hz, 1H), 7.05 (d, *J* = 7.5 Hz, 1H), 5.26 – 5.24 (m, 1H), 4.90 (dd, *J* = 2.0, 1.0 Hz, 1H), 4.68 (d, *J* = 5.0 Hz, 2H), 2.42 (s, 3H), 2.08 (s, 3H).

**<sup>13</sup>C NMR** (125 MHz, CDCl<sub>3</sub>)

δ 162.38, 147.21, 145.44, 145.42, 144.42, 144.40, 142.52, 138.02, 131.76, 129.48, 127.86, 126.17, 115.58, 38.86, 25.74, 19.71.

**HRMS (ESI)** for C<sub>16</sub>H<sub>17</sub>N<sub>3</sub>ONa [M+Na]<sup>+</sup>: 290.1264, found: 290.1269.

**FTIR** (KBr, cm<sup>-1</sup>)

3458.88, 3442.05, 3425.23, 3408.41, 3397.22, 2973.83, 2926.17, 1653.27, 1633.64, 1524.30, 1398.13, 1151.40, 1019.63, 901.87, 800.93.

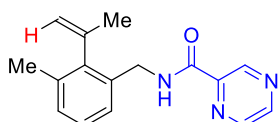

***N*-(3-methyl-2-(prop-1-en-2-yl)benzyl)pyrazine-2-carboxamide (**6n**)**

Following the general procedure C, **6n** was obtained as a white solid (0.83 g, 62% yield for three steps, m.p. = 97-98 °C).

**<sup>1</sup>H NMR** (500 MHz, CDCl<sub>3</sub>)

δ 9.43 (d, *J* = 1.5 Hz, 1H), 8.73 (d, *J* = 2.5 Hz, 1H), 8.49 (dd, *J* = 2.5, 1.5 Hz, 1H), 8.00 (s, 1H), 7.26 – 7.24 (m, 1H), 7.18 – 7.14 (m, 2H), 5.37 (d, *J* = 3.0 Hz, 1H), 4.89 (m, 1H), 4.76 (dd, *J* = 14.5, 6.6 Hz, 1H), 4.48 (dd, *J* = 14.5, 5.0 Hz, 1H), 2.29 (s, 3H), 2.02 (s, 3H).

**<sup>13</sup>C NMR** (125 MHz, CDCl<sub>3</sub>)

δ 162.57, 147.19, 144.55, 144.49, 143.84, 143.02, 142.52, 135.37, 134.27, 129.40, 127.09, 126.25, 116.07, 41.55, 24.28, 19.45.

**HRMS (ESI)** for  $C_{16}H_{17}N_3OK$   $[M+K]^+$ : 290.1264, found: 290.1274.

**FTIR** (KBr,  $cm^{-1}$ )

3458.88, 3442.06, 3425.23, 3388.79, 3088.79, 2968.22, 2923.36,  
1667.29, 1653.27, 1557.94, 1527.10, 1420.56, 1294.39, 1028.04,  
772.90, 641.12.

### Procedure for **6O** Synthesis

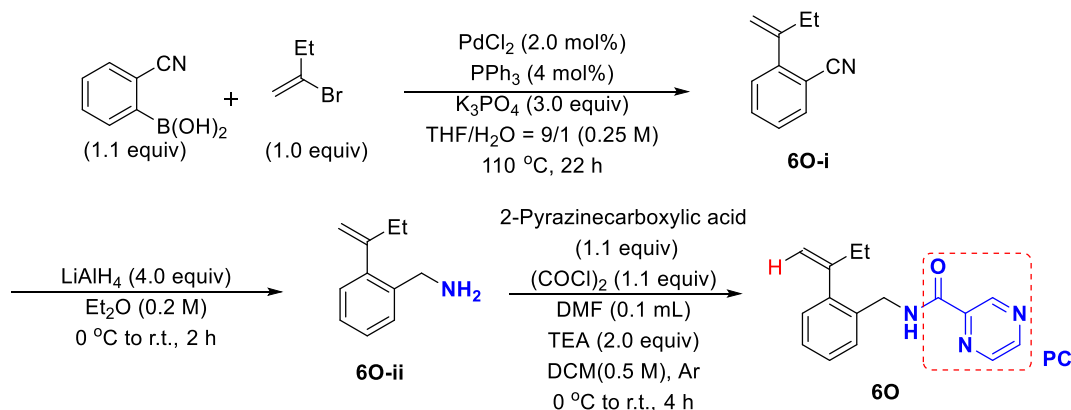

**Suzuki Reaction**<sup>[7]</sup>: A solution of 2-cyanobenzeneboronic acid (5.5 mmol, 1.1 equiv),  $\text{PdCl}_2$  (0.1 mmol, 2.0 mol%),  $\text{PPh}_3$  (0.2 mmol, 4.0 mol%),  $\text{K}_3\text{PO}_4$  (15.0 mmol, 3.0 equiv), and 2-bromobut-1-ene (5.00 mmol) in THF/ $\text{H}_2\text{O}$  (9:1) (20 mL) was heated at  $110^\circ\text{C}$  under  $\text{N}_2$  atmosphere in a sealed tube. The reaction mixture was stirred at  $110^\circ\text{C}$  for 22 h, then cooled to rt and diluted with  $\text{H}_2\text{O}$  (20 mL) followed by extraction with EtOAc (30 mL x 3). The solvent was removed in vacuo, and the crude product was purified by silica gel chromatography ( $\text{SiO}_2$ , PE/EtOAc) to obtain the corresponding product (**6O-i**).

**Benzonitrile Reduction and PC Amide Preparation** was performed following the general procedure C.

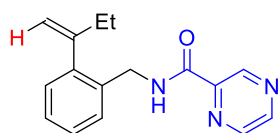

**N-(2-(but-1-en-2-yl)benzyl)pyrazine-2-carboxamide (**6O**)**

Following the procedure, **6O** was obtained as a yellow solid (0.95 g, 53% yield for three steps, m.p. =  $63\text{--}64^\circ\text{C}$ ).

**<sup>1</sup>H NMR** (500 MHz,  $\text{CDCl}_3$ )

$\delta$  9.43 (d,  $J = 1.5$  Hz, 1H), 8.74 (d,  $J = 2.5$  Hz, 1H), 8.49 (dd,  $J = 2.5, 1.5$  Hz, 1H), 8.01 (s, 1H), 7.42 – 7.39 (m, 1H), 7.28 – 7.26 (m, 1H), 6.41 (s, 1H), 5.81 (d,  $J = 1.5$  Hz, 1H), 5.79 (d,  $J = 1.5$  Hz, 1H), 5.77 (d,  $J = 1.5$  Hz, 1H), 5.75 (d,  $J = 1.5$  Hz, 1H), 5.73 (d,  $J = 1.5$  Hz, 1H), 5.71 (d,  $J = 1.5$  Hz, 1H), 5.69 (d,  $J = 1.5$  Hz, 1H), 5.67 (d,  $J = 1.5$  Hz, 1H), 5.65 (d,  $J = 1.5$  Hz, 1H), 5.63 (d,  $J = 1.5$  Hz, 1H), 5.61 (d,  $J = 1.5$  Hz, 1H), 5.59 (d,  $J = 1.5$  Hz, 1H), 5.57 (d,  $J = 1.5$  Hz, 1H), 5.55 (d,  $J = 1.5$  Hz, 1H), 5.53 (d,  $J = 1.5$  Hz, 1H), 5.51 (d,  $J = 1.5$  Hz, 1H), 5.49 (d,  $J = 1.5$  Hz, 1H), 5.47 (d,  $J = 1.5$  Hz, 1H), 5.45 (d,  $J = 1.5$  Hz, 1H), 5.43 (d,  $J = 1.5$  Hz, 1H), 5.41 (d,  $J = 1.5$  Hz, 1H), 5.39 (d,  $J = 1.5$  Hz, 1H), 5.37 (d,  $J = 1.5$  Hz, 1H), 5.35 (d,  $J = 1.5$  Hz, 1H), 5.33 (d,  $J = 1.5$  Hz, 1H), 5.31 (d,  $J = 1.5$  Hz, 1H), 5.29 (d,  $J = 1.5$  Hz, 1H), 5.27 (d,  $J = 1.5$  Hz, 1H), 5.25 (d,  $J = 1.5$  Hz, 1H), 5.23 (d,  $J = 1.5$  Hz, 1H), 5.21 (d,  $J = 1.5$  Hz, 1H), 5.19 (d,  $J = 1.5$  Hz, 1H), 5.17 (d,  $J = 1.5$  Hz, 1H), 5.15 (d,  $J = 1.5$  Hz, 1H), 5.13 (d,  $J = 1.5$  Hz, 1H), 5.11 (d,  $J = 1.5$  Hz, 1H), 5.09 (d,  $J = 1.5$  Hz, 1H), 5.07 (d,  $J = 1.5$  Hz, 1H), 5.05 (d,  $J = 1.5$  Hz, 1H), 5.03 (d,  $J = 1.5$  Hz, 1H), 5.01 (d,  $J = 1.5$  Hz, 1H), 4.99 (d,  $J = 1.5$  Hz, 1H), 4.97 (d,  $J = 1.5$  Hz, 1H), 4.95 (d,  $J = 1.5$  Hz, 1H), 4.93 (d,  $J = 1.5$  Hz, 1H), 4.91 (d,  $J = 1.5$  Hz, 1H), 4.89 (d,  $J = 1.5$  Hz, 1H), 4.87 (d,  $J = 1.5$  Hz, 1H), 4.85 (d,  $J = 1.5$  Hz, 1H), 4.83 (d,  $J = 1.5$  Hz, 1H), 4.81 (d,  $J = 1.5$  Hz, 1H), 4.79 (d,  $J = 1.5$  Hz, 1H), 4.77 (d,  $J = 1.5$  Hz, 1H), 4.75 (d,  $J = 1.5$  Hz, 1H), 4.73 (d,  $J = 1.5$  Hz, 1H), 4.71 (d,  $J = 1.5$  Hz, 1H), 4.69 (d,  $J = 1.5$  Hz, 1H), 4.67 (d,  $J = 1.5$  Hz, 1H), 4.65 (d,  $J = 1.5$  Hz, 1H), 4.63 (d,  $J = 1.5$  Hz, 1H), 4.61 (d,  $J = 1.5$  Hz, 1H), 4.59 (d,  $J = 1.5$  Hz, 1H), 4.57 (d,  $J = 1.5$  Hz, 1H), 4.55 (d,  $J = 1.5$  Hz, 1H), 4.53 (d,  $J = 1.5$  Hz, 1H), 4.51 (d,  $J = 1.5$  Hz, 1H), 4.49 (d,  $J = 1.5$  Hz, 1H), 4.47 (d,  $J = 1.5$  Hz, 1H), 4.45 (d,  $J = 1.5$  Hz, 1H), 4.43 (d,  $J = 1.5$  Hz, 1H), 4.41 (d,  $J = 1.5$  Hz, 1H), 4.39 (d,  $J = 1.5$  Hz, 1H), 4.37 (d,  $J = 1.5$  Hz, 1H), 4.35 (d,  $J = 1.5$  Hz, 1H), 4.33 (d,  $J = 1.5$  Hz, 1H), 4.31 (d,  $J = 1.5$  Hz, 1H), 4.29 (d,  $J = 1.5$  Hz, 1H), 4.27 (d,  $J = 1.5$  Hz, 1H), 4.25 (d,  $J = 1.5$  Hz, 1H), 4.23 (d,  $J = 1.5$  Hz, 1H), 4.21 (d,  $J = 1.5$  Hz, 1H), 4.19 (d,  $J = 1.5$  Hz, 1H), 4.17 (d,  $J = 1.5$  Hz, 1H), 4.15 (d,  $J = 1.5$  Hz, 1H), 4.13 (d,  $J = 1.5$  Hz, 1H), 4.11 (d,  $J = 1.5$  Hz, 1H), 4.09 (d,  $J = 1.5$  Hz, 1H), 4.07 (d,  $J = 1.5$  Hz, 1H), 4.05 (d,  $J = 1.5$  Hz, 1H), 4.03 (d,  $J = 1.5$  Hz, 1H), 4.01 (d,  $J = 1.5$  Hz, 1H), 3.99 (d,  $J = 1.5$  Hz, 1H), 3.97 (d,  $J = 1.5$  Hz, 1H), 3.95 (d,  $J = 1.5$  Hz, 1H), 3.93 (d,  $J = 1.5$  Hz, 1H), 3.91 (d,  $J = 1.5$  Hz, 1H), 3.89 (d,  $J = 1.5$  Hz, 1H), 3.87 (d,  $J = 1.5$  Hz, 1H), 3.85 (d,  $J = 1.5$  Hz, 1H), 3.83 (d,  $J = 1.5$  Hz, 1H), 3.81 (d,  $J = 1.5$  Hz, 1H), 3.79 (d,  $J = 1.5$  Hz, 1H), 3.77 (d,  $J = 1.5$  Hz, 1H), 3.75 (d,  $J = 1.5$  Hz, 1H), 3.73 (d,  $J = 1.5$  Hz, 1H), 3.71 (d,  $J = 1.5$  Hz, 1H), 3.69 (d,  $J = 1.5$  Hz, 1H), 3.67 (d,  $J = 1.5$  Hz, 1H), 3.65 (d,  $J = 1.5$  Hz, 1H), 3.63 (d,  $J = 1.5$  Hz, 1H), 3.61 (d,  $J = 1.5$  Hz, 1H), 3.59 (d,  $J = 1.5$  Hz, 1H), 3.57 (d,  $J = 1.5$  Hz, 1H), 3.55 (d,  $J = 1.5$  Hz, 1H), 3.53 (d,  $J = 1.5$  Hz, 1H), 3.51 (d,  $J = 1.5$  Hz, 1H), 3.49 (d,  $J = 1.5$  Hz, 1H), 3.47 (d,  $J = 1.5$  Hz, 1H), 3.45 (d,  $J = 1.5$  Hz, 1H), 3.43 (d,  $J = 1.5$  Hz, 1H), 3.41 (d,  $J = 1.5$  Hz, 1H), 3.39 (d,  $J = 1.5$  Hz, 1H), 3.37 (d,  $J = 1.5$  Hz, 1H), 3.35 (d,  $J = 1.5$  Hz, 1H), 3.33 (d,  $J = 1.5$  Hz, 1H), 3.31 (d,  $J = 1.5$  Hz, 1H), 3.29 (d,  $J = 1.5$  Hz, 1H), 3.27 (d,  $J = 1.5$  Hz, 1H), 3.25 (d,  $J = 1.5$  Hz, 1H), 3.23 (d,  $J = 1.5$  Hz, 1H), 3.21 (d,  $J = 1.5$  Hz, 1H), 3.19 (d,  $J = 1.5$  Hz, 1H), 3.17 (d,  $J = 1.5$  Hz, 1H), 3.15 (d,  $J = 1.5$  Hz, 1H), 3.13 (d,  $J = 1.5$  Hz, 1H), 3.11 (d,  $J = 1.5$  Hz, 1H), 3.09 (d,  $J = 1.5$  Hz, 1H), 3.07 (d,  $J = 1.5$  Hz, 1H), 3.05 (d,  $J = 1.5$  Hz, 1H), 3.03 (d,  $J = 1.5$  Hz, 1H), 3.01 (d,  $J = 1.5$  Hz, 1H), 2.99 (d,  $J = 1.5$  Hz, 1H), 2.97 (d,  $J = 1.5$  Hz, 1H), 2.95 (d,  $J = 1.5$  Hz, 1H), 2.93 (d,  $J = 1.5$  Hz, 1H), 2.91 (d,  $J = 1.5$  Hz, 1H), 2.89 (d,  $J = 1.5$  Hz, 1H), 2.87 (d,  $J = 1.5$  Hz, 1H), 2.85 (d,  $J = 1.5$  Hz, 1H), 2.83 (d,  $J = 1.5$  Hz, 1H), 2.81 (d,  $J = 1.5$  Hz, 1H), 2.79 (d,  $J = 1.5$  Hz, 1H), 2.77 (d,  $J = 1.5$  Hz, 1H), 2.75 (d,  $J = 1.5$  Hz, 1H), 2.73 (d,  $J = 1.5$  Hz, 1H), 2.71 (d,  $J = 1.5$  Hz, 1H), 2.69 (d,  $J = 1.5$  Hz, 1H), 2.67 (d,  $J = 1.5$  Hz, 1H), 2.65 (d,  $J = 1.5$  Hz, 1H), 2.63 (d,  $J = 1.5$  Hz, 1H), 2.61 (d,  $J = 1.5$  Hz, 1H), 2.59 (d,  $J = 1.5$  Hz, 1H), 2.57 (d,  $J = 1.5$  Hz, 1H), 2.55 (d,  $J = 1.5$  Hz, 1H), 2.53 (d,  $J = 1.5$  Hz, 1H), 2.51 (d,  $J = 1.5$  Hz, 1H), 2.49 (d,  $J = 1.5$  Hz, 1H), 2.47 (d,  $J = 1.5$  Hz, 1H), 2.45 (d,  $J = 1.5$  Hz, 1H), 2.43 (d,  $J = 1.5$  Hz, 1H), 2.41 (d,  $J = 1.5$  Hz, 1H), 2.39 (d,  $J = 1.5$  Hz, 1H), 2.37 (d,  $J = 1.5$  Hz, 1H), 2.35 (d,  $J = 1.5$  Hz, 1H), 2.33 (d,  $J = 1.5$  Hz, 1H), 2.31 (d,  $J = 1.5$  Hz, 1H), 2.29 (d,  $J = 1.5$  Hz, 1H), 2.27 (d,  $J = 1.5$  Hz, 1H), 2.25 (d,  $J = 1.5$  Hz, 1H), 2.23 (d,  $J = 1.5$  Hz, 1H), 2.21 (d,  $J = 1.5$  Hz, 1H), 2.19 (d,  $J = 1.5$  Hz, 1H), 2.17 (d,  $J = 1.5$  Hz, 1H), 2.15 (d,  $J = 1.5$  Hz, 1H), 2.13 (d,  $J = 1.5$  Hz, 1H), 2.11 (d,  $J = 1.5$  Hz, 1H), 2.09 (d,  $J = 1.5$  Hz, 1H), 2.07 (d,  $J = 1.5$  Hz, 1H), 2.05 (d,  $J = 1.5$  Hz, 1H), 2.03 (d,  $J = 1.5$  Hz, 1H), 2.01 (d,  $J = 1.5$  Hz, 1H), 1.99 (d,  $J = 1.5$  Hz, 1H), 1.97 (d,  $J = 1.5$  Hz, 1H), 1.95 (d,  $J = 1.5$  Hz, 1H), 1.93 (d,  $J = 1.5$  Hz, 1H), 1.91 (d,  $J = 1.5$  Hz, 1H), 1.89 (d,  $J = 1.5$  Hz, 1H), 1.87 (d,  $J = 1.5$  Hz, 1H), 1.85 (d,  $J = 1.5$  Hz, 1H), 1.83 (d,  $J = 1.5$  Hz, 1H), 1.81 (d,  $J = 1.5$  Hz, 1H), 1.79 (d,  $J = 1.5$  Hz, 1H), 1.77 (d,  $J = 1.5$  Hz, 1H), 1.75 (d,  $J = 1.5$  Hz, 1H), 1.73 (d,  $J = 1.5$  Hz, 1H), 1.71 (d,  $J = 1.5$  Hz, 1H), 1.69 (d,  $J = 1.5$  Hz, 1H), 1.67 (d,  $J = 1.5$  Hz, 1H), 1.65 (d,  $J = 1.5$  Hz, 1H), 1.63 (d,  $J = 1.5$  Hz, 1H), 1.61 (d,  $J = 1.5$  Hz, 1H), 1.59 (d,  $J = 1.5$  Hz, 1H), 1.57 (d,  $J = 1.5$  Hz, 1H), 1.55 (d,  $J = 1.5$  Hz, 1H), 1.53 (d,  $J = 1.5$  Hz, 1H), 1.51 (d,  $J = 1.5$  Hz, 1H), 1.49 (d,  $J = 1.5$  Hz, 1H), 1.47 (d,  $J = 1.5$  Hz, 1H), 1.45 (d,  $J = 1.5$  Hz, 1H), 1.43 (d,  $J = 1.5$  Hz, 1H), 1.41 (d,  $J = 1.5$  Hz, 1H), 1.39 (d,  $J = 1.5$  Hz, 1H), 1.37 (d,  $J = 1.5$  Hz, 1H), 1.35 (d,  $J = 1.5$  Hz, 1H), 1.33 (d,  $J = 1.5$  Hz, 1H), 1.31 (d,  $J = 1.5$  Hz, 1H), 1.29 (d,  $J = 1.5$  Hz, 1H), 1.27 (d,  $J = 1.5$  Hz, 1H), 1.25 (d,  $J = 1.5$  Hz, 1H), 1.23 (d,  $J = 1.5$  Hz, 1H), 1.21 (d,  $J = 1.5$  Hz, 1H), 1.19 (d,  $J = 1.5$  Hz, 1H), 1.17 (d,  $J = 1.5$  Hz, 1H), 1.15 (d,  $J = 1.5$  Hz, 1H), 1.13 (d,  $J = 1.5$  Hz, 1H), 1.11 (d,  $J = 1.5$  Hz, 1H), 1.09 (d,  $J = 1.5$  Hz, 1H), 1.07 (d,  $J = 1.5$  Hz, 1H), 1.05 (d,  $J = 1.5$  Hz, 1H), 1.03 (d,  $J = 1.5$  Hz, 1H), 1.01 (d,  $J = 1.5$  Hz, 1H), 0.99 (d,  $J = 1.5$  Hz, 1H), 0.97 (d,  $J = 1.5$  Hz, 1H), 0.95 (d,  $J = 1.5$  Hz, 1H), 0.93 (d,  $J = 1.5$  Hz, 1H), 0.91 (d,  $J = 1.5$  Hz, 1H), 0.89 (d,  $J = 1.5$  Hz, 1H), 0.87 (d,  $J = 1.5$  Hz, 1H), 0.85 (d,  $J = 1.5$  Hz, 1H), 0.83 (d,  $J = 1.5$  Hz, 1H), 0.81 (d,  $J = 1.5$  Hz, 1H), 0.79 (d,  $J = 1.5$  Hz, 1H), 0.77 (d,  $J = 1.5$  Hz, 1H), 0.75 (d,  $J = 1.5$  Hz, 1H), 0.73 (d,  $J = 1.5$  Hz, 1H), 0.71 (d,  $J = 1.5$  Hz, 1H), 0.69 (d,  $J = 1.5$  Hz, 1H), 0.67 (d,  $J = 1.5$  Hz, 1H), 0.65 (d,  $J = 1.5$  Hz, 1H), 0.63 (d,  $J = 1.5$  Hz, 1H), 0.61 (d,  $J = 1.5$  Hz, 1H), 0.59 (d,  $J = 1.5$  Hz, 1H), 0.57 (d,  $J = 1.5$  Hz, 1H), 0.55 (d,  $J = 1.5$  Hz, 1H), 0.53 (d,  $J = 1.5$  Hz, 1H), 0.51 (d,  $J = 1.5$  Hz, 1H), 0.49 (d,  $J = 1.5$  Hz, 1H), 0.47 (d,  $J = 1.5$  Hz, 1H), 0.45 (d,  $J = 1.5$  Hz, 1H), 0.43 (d,  $J = 1.5$  Hz, 1H), 0.41 (d,  $J = 1.5$  Hz, 1H), 0.39 (d,  $J = 1.5$  Hz, 1H), 0.37 (d,  $J = 1.5$  Hz, 1H), 0.35 (d,  $J = 1.5$  Hz, 1H), 0.33 (d,  $J = 1.5$  Hz, 1H), 0.31 (d,  $J = 1.5$  Hz, 1H), 0.29 (d,  $J = 1.5$  Hz, 1H), 0.27 (d,  $J = 1.5$  Hz, 1H), 0.25 (d,  $J = 1.5$  Hz, 1H), 0.23 (d,  $J = 1.5$  Hz, 1H), 0.21 (d,  $J = 1.5$  Hz, 1H), 0.19 (d,  $J = 1.5$  Hz, 1H), 0.17 (d,  $J = 1.5$  Hz, 1H), 0.15 (d,  $J = 1.5$  Hz, 1H), 0.13 (d,  $J = 1.5$  Hz, 1H), 0.11 (d,  $J = 1.5$  Hz, 1H), 0.09 (d,  $J = 1.5$  Hz, 1H), 0.07 (d,  $J = 1.5$  Hz, 1H), 0.05 (d,  $J = 1.5$  Hz, 1H), 0.03 (d,  $J = 1.5$  Hz, 1H), 0.01 (d,  $J = 1.5$  Hz, 1H), 0.00 (d,  $J = 1.5$  Hz, 1H).



1H), 7.16 – 7.13 (m, 1H), 5.26 (q,  $J$  = 1.5 Hz, 1H), 4.95 – 4.94 (m, 1H), 4.67 (d,  $J$  = 6.0 Hz, 2H), 2.37 (q,  $J$  = 7.5 Hz, 2H), 1.07 (d,  $J$  = 15.0 Hz, 3H).

**<sup>13</sup>C NMR** (125 MHz, CDCl<sub>3</sub>)

δ 162.66, 150.37, 147.24, 144.49, 143.34, 142.52, 134.42, 128.82, 128.70, 127.42, 127.35, 113.56, 41.31, 31.24, 12.26.

**HRMS (ESI)** for C<sub>16</sub>H<sub>17</sub>N<sub>3</sub>ONa [M+Na]<sup>+</sup>: 290.1264, found: 290.1262.

**FTIR** (KBr, cm<sup>-1</sup>)

3475.70, 3461.68, 3416.82, 1670.09, 1656.07, 1636.45, 1616.82, 1538.32, 1524.30, 1400.93, 1016.82.

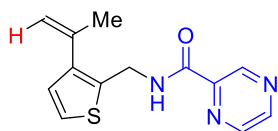

*N*-((3-(prop-1-en-2-yl)thiophen-2-yl)methyl)pyrazine-2-carboxamide (**6q**)

Following the general procedure C, **6q** was obtained as a yellow solid (0.71 g, 55% yield for three steps, m.p. = 79-80 °C).

**<sup>1</sup>H NMR** (500 MHz, CDCl<sub>3</sub>)

δ 9.44 (d,  $J$  = 1.5 Hz, 1H), 8.75 (d,  $J$  = 2.5 Hz, 1H), 8.51 – 8.50 (m, 1H), 8.07 (s, 1H), 7.19 (d,  $J$  = 5.0 Hz, 1H), 6.96 (d,  $J$  = 5.0 Hz, 1H), 5.24 (t,  $J$  = 2.0 Hz, 1H), 4.98 (dd,  $J$  = 2.0, 1.0 Hz, 1H), 4.87 (d,  $J$  = 5.5 Hz, 2H), 2.09 (s, 3H).

**<sup>13</sup>C NMR** (125 MHz, CDCl<sub>3</sub>)

δ 162.60, 147.37, 144.51, 144.25, 142.57, 142.12, 139.47, 134.35, 127.75, 123.83, 115.72, 37.10, 24.13.

**HRMS (ESI)** for C<sub>13</sub>H<sub>13</sub>N<sub>3</sub>OSNa [M+Na]<sup>+</sup>: 282.0672, found: 282.0682.

**FTIR** (KBr, cm<sup>-1</sup>)

3422.43, 3408.41, 3397.20, 3383.18, 2968.22, 2928.97, 1675.70, 1521.50, 1398.13, 1285.98, 1171.03, 1022.43, 899.07, 775.70.

## Procedure for 6r Synthesis

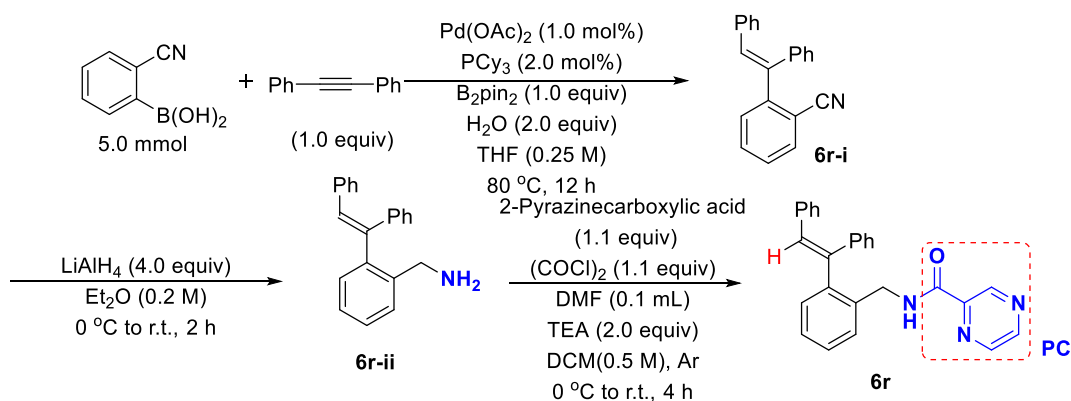

**Suzuki Reaction**<sup>[8]</sup>: A solution of 2-cyanobenzeneboronic acid (5.0 mmol, 1.0 equiv), Pd(OAc)<sub>2</sub> (0.05 mmol, 1.0 mol%), PCy<sub>3</sub> (0.1 mmol, 2.0 mol%), B<sub>2</sub>pin<sub>2</sub> (5.0 mmol, 1.0 equiv), H<sub>2</sub>O (10.0 mmol, 2.0 equiv) and 1,2-diphenylethyne (5.0 mmol) in THF (20 mL) was heated at 80 °C under N<sub>2</sub> atmosphere in a sealed tube. The reaction mixture was stirred at 80 °C for 12 h, then cooled to rt and diluted with H<sub>2</sub>O (20 mL) followed by extraction with EtOAc (30 mL × 3). The solvent was removed in vacuo, and the crude product was purified by silica gel chromatography (SiO<sub>2</sub>, PE/EtOAc) to obtain the corresponding product (**6r-i**).

**Benzonitrile Reduction and PC Amide Preparation** was following the general procedure C.

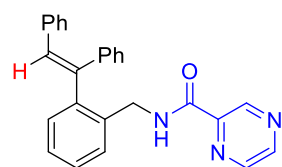

(*E*)-*N*-(2-(1,2-diphenylvinyl)benzyl)pyrazine-2-carboxamide (**6r**)

Following the procedure, **6r** was obtained as a yellow solid (0.54 g, 28% yield for three steps, m.p. = 90-91 °C).

**<sup>1</sup>H NMR** (500 MHz, CDCl<sub>3</sub>)

δ 9.34 (d, *J* = 1.5 Hz, 1H), 8.70 (d, *J* = 2.5 Hz, 1H), 8.43 (dd, *J* = 2.5, 1.5 Hz, 1H), 7.69 (s, 1H), 7.42 – 7.39 (m, 2H), 7.35 – 7.32 (m, 2H), 7.21 – 7.16 (m, 8H), 7.13 (dd, *J* = 7.5, 2.0 Hz, 2H), 6.71 (s, 1H), 4.46 (d, *J* = 6.0 Hz, 2H).

**<sup>13</sup>C NMR** (125 MHz, CDCl<sub>3</sub>)

δ 161.43, 146.05, 143.46, 143.35, 142.86, 141.28, 140.79, 138.77, 135.90, 134.65, 130.04, 129.83, 128.74, 128.67, 128.38, 127.53, 127.13, 127.07, 126.75, 126.55, 126.08, 40.60.

**HRMS (ESI)** for C<sub>26</sub>H<sub>21</sub>N<sub>3</sub>ONa [M+Na]<sup>+</sup>: 414.1577, found: 414.1586.

**FTIR** (KBr, cm<sup>-1</sup>)

3747.66, 3649.53, 3629.91, 3565.42, 3416.82, 2962.62, 2351.40,  
1686.92, 1656.07, 1560.75, 1543.93, 1504.67, 1406.54, 1384.11,  
1025.23.

### 3. Optimization of Reaction Conditions

#### 3.1 Optimization of Conditions for the Cross-Coupling-1

**Table S1. Preliminary Screening of Solvents** <sup>[a]</sup>

| 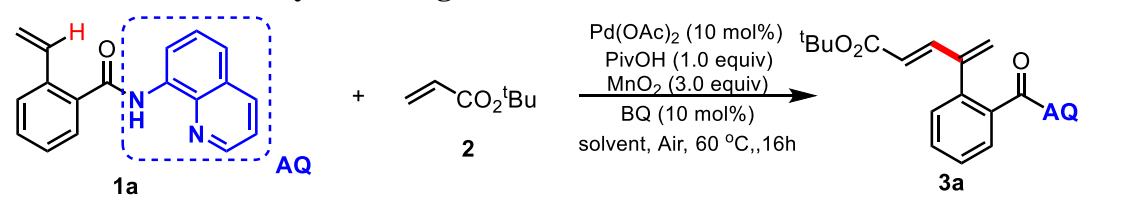 |                                    |                          |
|------------------------------------------------------------------------------------|------------------------------------|--------------------------|
| Entry                                                                              | Solvent                            | Yield (%) <sup>[b]</sup> |
| 1                                                                                  | MeCN                               | 13                       |
| 2                                                                                  | DCM                                | 32                       |
| 3                                                                                  | toluene                            | 28                       |
| 4                                                                                  | DME                                | 16                       |
| 5                                                                                  | EA                                 | 23                       |
| 6                                                                                  | DMF                                | Trace                    |
| 7                                                                                  | DMSO                               | Trace                    |
| 8                                                                                  | MeOH                               | 30                       |
| 9                                                                                  | HFIP                               | Trace                    |
| 10                                                                                 | CF <sub>3</sub> CH <sub>2</sub> OH | Trace                    |
| 11                                                                                 | <b>EtOH</b>                        | <b>49</b>                |

<sup>[a]</sup>Reactions conditions: **1a** (0.1 mmol), **2** (0.2 mmol), Pd(OAc)<sub>2</sub> (10 mol %), PivOH (1.0 equiv), MnO<sub>2</sub> (3.0 equiv), BQ (10 mol%) in a solvent (0.1 M) under air at 60 °C for 16 h. <sup>[b]</sup>Isolated yields.

**Table S2. Preliminary Screening of Additives-1** <sup>[a]</sup>

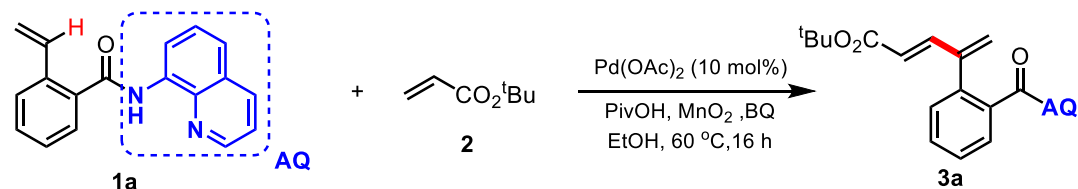

| Entry    | Additive-1                   | Yield (%) <sup>[b]</sup> |
|----------|------------------------------|--------------------------|
| <b>1</b> | <b>PivOH (1.5 equiv)</b>     | <b>51</b>                |
| 2        | PivOH (2.0 equiv)            | 49                       |
| 3        | PivOH (2.5 equiv)            | 51                       |
| 4        | BQ (20 mol%)                 | 47                       |
| 5        | BQ (50 mol%)                 | 30                       |
| 6        | No BQ                        | 28                       |
| 7        | MnO <sub>2</sub> (1.0 equiv) | 26                       |
| 8        | MnO <sub>2</sub> (2.0 equiv) | 33                       |
| 9        | Ar                           | 47                       |
| 10       | O <sub>2</sub> (1.0 atm)     | 50                       |

<sup>[a]</sup>Reactions conditions: **1a** (0.1 mmol), **2** (0.2 mmol), Pd(OAc)<sub>2</sub> (10 mol %), additives, in EtOH (0.1 M) at 60 °C for 16 h. <sup>[b]</sup>Isolated yields.

**Table S3. Preliminary Screening of Additives-2<sup>[a]</sup>**

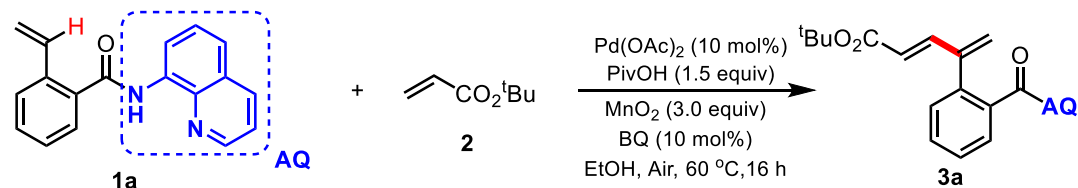

| Entry | Additive-2           | Yield (%) <sup>[b]</sup> |
|-------|----------------------|--------------------------|
| 1     | <b>2 (1.5 equiv)</b> | 48                       |
| 2     | <b>2 (2.5 equiv)</b> | <b>63</b>                |
| 3     | <b>2 (3.0 equiv)</b> | 56                       |
| 4     | C = 0.05 M           | 25                       |
| 5     | <b>C = 0.15 M</b>    | <b>54</b>                |
| 6     | C = 0.2 M            | 48                       |

<sup>[a]</sup>Reactions conditions: **1a** (0.1 mmol), **2** (0.2 mmol), Pd(OAc)<sub>2</sub> (10 mol%), PivOH (1.5 equiv), MnO<sub>2</sub> (3.0 equiv), BQ (10 mol%) in EtOH under air at 60 °C for 16 h. <sup>[b]</sup>Isolated yields.

**Table S4. Preliminary Screening of Catalyst Loading and Time<sup>[a]</sup>**

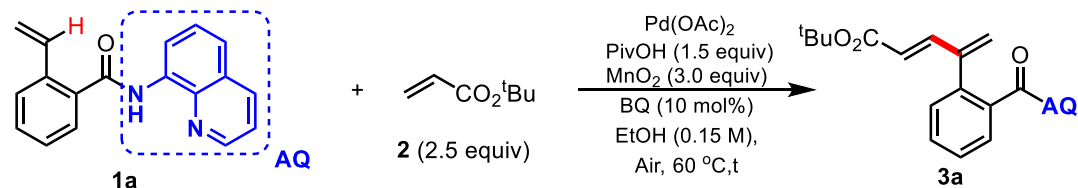

| Entry | Catalyst and time                    | Yield (%) <sup>[b]</sup> |
|-------|--------------------------------------|--------------------------|
| 1     | Pd(OAc) <sub>2</sub> (10 mol%), 16 h | 42                       |

|   |                                            |           |
|---|--------------------------------------------|-----------|
| 2 | Pd(OAc) <sub>2</sub> (10 mol%), 24 h       | 54        |
| 3 | Pd(OAc) <sub>2</sub> (10 mol%), 36 h       | 52        |
| 4 | Pd(OAc) <sub>2</sub> (15 mol%), 16 h       | 51        |
| 5 | <b>Pd(OAc)<sub>2</sub> (15 mol%), 24 h</b> | <b>69</b> |
| 6 | Pd(OAc) <sub>2</sub> (15 mol%), 36 h       | 59        |

<sup>[a]</sup> Reactions conditions: **1a** (0.15 mmol), **2a** (2.5 equiv), Pd(OAc)<sub>2</sub>, PivOH (1.5 equiv), MnO<sub>2</sub> (3.0 equiv), BQ (10 mol%) in EtOH (0.15 M) under air at 60 °C. <sup>[b]</sup> Isolated yields.

**Table S5. Preliminary Screening of Directing Group<sup>[a]</sup>**

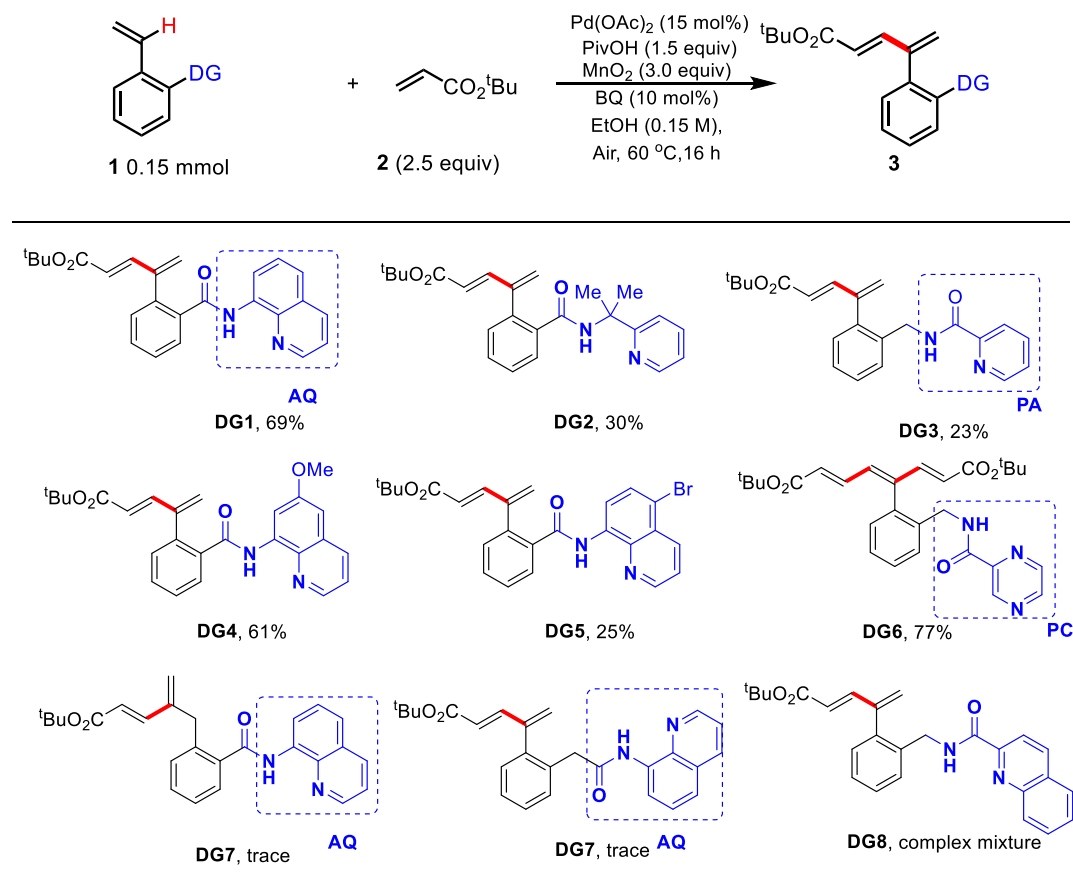

<sup>[a]</sup> Reactions conditions: **1a** (0.15 mmol), **2a** (2.5 equiv), Pd(OAc)<sub>2</sub> (15 mol%), PivOH (1.5 equiv), MnO<sub>2</sub> (3.0 equiv), BQ (10 mol%) in EtOH (0.15 M) under air at 60 °C for 24 h.

<sup>[b]</sup> Isolated yields.

## 4. General Procedure 1 for Alkenyl C-H Alkenylation

### 4.1 General Procedure 1 for Cross-Coupling Between Amides and Alkenes

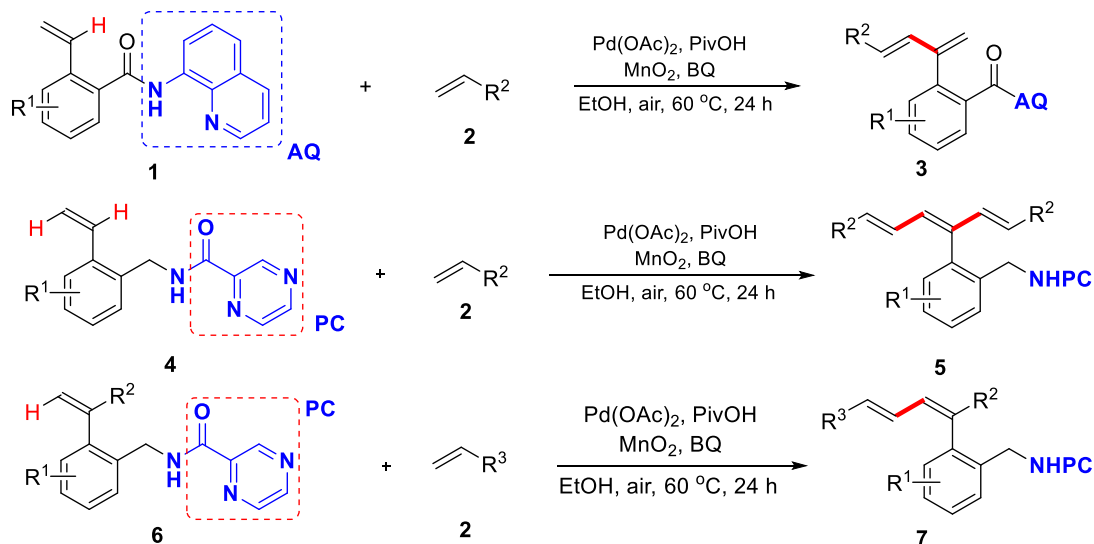

An screw-cap vial was charged with  $\text{Pd}(\text{OAc})_2$  (15 mol%, 0.023 mmol),  $\text{MnO}_2$  (3.0 equiv, 0.45 mmol), BQ (10 mol%, 0.015 mmol), amide **1**, **4** or **6** (1.0 equiv, 0.15 mmol), EtOH (1.0 mL). Then, pivalic acid (1.5 equiv, 0.23 mmol), and olefin **2** (2.5 equiv, 0.38 mmol) were added into the solution in sequence. The vial was sealed under air and heated to 60 °C with stirring for 24 h. After cooling down, the mixture was directly applied to a flash column chromatography (PE/EA mixtures).

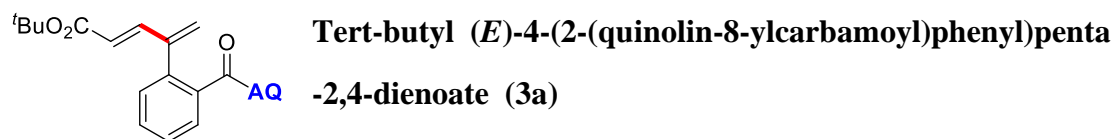

Following the general procedure 1, **3a** was obtained as a colorless oil (41.5 mg, 69% yield).

**<sup>1</sup>H NMR** (500 MHz,  $\text{CDCl}_3$ )

$\delta$  10.22 (s, 1H), 8.83 (dd,  $J = 7.0, 1.5$  Hz, 1H), 8.73 (dd,  $J = 4.0, 1.5$  Hz, 1H), 8.15 (dd,  $J = 8.0, 1.5$  Hz, 1H), 7.90 – 7.88 (m, 1H), 7.54 – 7.50 (m, 4H), 7.46 (d,  $J = 16.0$  Hz, 1H), 7.42 (q,  $J = 4.0$  Hz, 1H), 7.31 – 7.29 (m, 1H), 5.73 (s, 1H), 5.64 (d,  $J = 15.5$  Hz, 1H), 5.61 (s,

1H), 1.37 (s, 9H).

**<sup>13</sup>C NMR** (125 MHz, CDCl<sub>3</sub>)

δ 165.87, 165.09, 147.08, 144.22, 144.02, 137.61, 135.78, 135.40, 135.17, 133.71, 129.49, 129.41, 127.73, 127.34, 126.90, 126.35, 124.89, 122.81, 120.69, 120.56, 115.48, 79.32, 27.00.

**HRMS (ESI)** for C<sub>25</sub>H<sub>25</sub>N<sub>2</sub>O<sub>3</sub> [M+H]<sup>+</sup>: 401.1860, found: 401.1851.

**FTIR** (KBr, cm<sup>-1</sup>)

3416.82, 2359.81, 2340.19, 1681.31, 1650.47, 1406.54, 1028.04, 671.96.

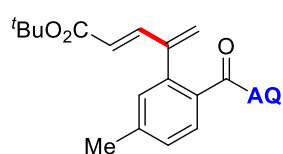

**Tert-butyl (*E*)-4-(5-methyl-2-(quinolin-8-ylcarbamoyl)penta-2,4-dienoate (3b)**

Following the general procedure 1, **3b** was obtained as a white oil (38.3 mg, 60% yield).

**<sup>1</sup>H NMR** (500 MHz, CDCl<sub>3</sub>)

δ 10.23 (s, 1H), 8.82 (dd, *J* = 7.5, 1.0 Hz, 1H), 8.73 (dd, *J* = 4.0, 1.5 Hz, 1H), 8.14 (dd, *J* = 8.0, 1.5 Hz, 1H), 7.81 (d, *J* = 7.5 Hz, 1H), 7.55 – 7.49 (m, 2H), 7.46 (d, *J* = 15.5 Hz, 1H), 7.42 (q, *J* = 4.0 Hz, 1H), 7.30 (dd, *J* = 8.0, 1.0 Hz, 1H), 7.09 (s, 1H), 5.73 (s, 1H), 5.62 (d, *J* = 15.5 Hz, 1H), 5.60 (s, 1H), 2.44 (s, 3H), 1.37 (s, 9H).

**<sup>13</sup>C NMR** (125 MHz, CDCl<sub>3</sub>)

δ 165.81, 165.14, 147.02, 144.48, 144.14, 139.87, 137.66, 135.82, 135.14, 133.87, 132.50, 130.00, 128.03, 127.91, 126.90, 126.37, 124.70, 122.72, 120.53, 120.51, 115.43, 79.28, 27.01, 20.34.

**HRMS (ESI)** for C<sub>26</sub>H<sub>27</sub>N<sub>2</sub>O<sub>4</sub> [M+H]<sup>+</sup>: 415.2016, found: 415.2023.

**FTIR** (KBr, cm<sup>-1</sup>)

3388.79, 2923.36, 2853.27, 2354.21, 1681.31, 1664.49, 1650.47, 1557.94, 1541.12, 1504.67, 1398.13, 1025.23.

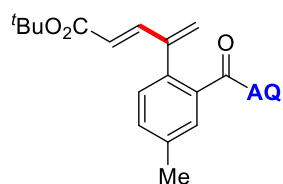

**Tert-butyl (*E*)-4-(3-methyl-2-(quinolin-8-ylcarbamoyl)phenyl)penta-2,4-dienoate (3c)**

Following the general procedure 1, **3c** was obtained as a colorless oil (44.1 mg, 71% yield).

**<sup>1</sup>H NMR** (500 MHz, CDCl<sub>3</sub>)

δ 10.19 (s, 1H), 8.82 (d, *J* = 7.0 Hz, 1H), 8.73 (dd, *J* = 4.5, 1.5 Hz, 1H), 8.14 (dd, *J* = 8.5, 1.5 Hz, 1H), 7.69 (s, 1H), 7.56 – 7.50 (m, 2H), 7.46 – 7.41 (m, 2H), 7.33 (dd, *J* = 8.0, 1.0 Hz, 1H), 7.18 (d, *J* = 7.5 Hz, 1H), 5.70 (s, 1H), 5.65 (d, *J* = 16.0 Hz, 1H), 5.59 (s, 1H), 2.46 (s, 3H), 1.37 (s, 9H).

**<sup>13</sup>C NMR** (125 MHz, CDCl<sub>3</sub>)

δ 166.08, 165.15, 147.05, 144.22, 144.14, 137.63, 137.28, 135.26, 135.14, 133.78, 132.79, 130.19, 129.32, 128.28, 126.90, 126.35, 124.83, 122.72, 120.61, 120.52, 115.47, 79.24, 27.02, 20.12.

**HRMS (ESI)** for C<sub>26</sub>H<sub>27</sub>N<sub>2</sub>O<sub>3</sub> [M+H]<sup>+</sup>: 415.2016, found: 415.2013.

**FTIR** (KBr, cm<sup>-1</sup>)

3747.66, 3646.73, 3627.1, 3568.22, 3212.15, 3178.5, 3007.48, 2962.62, 2351.4, 1653.27, 1535.51, 1504.67, 1403.74, 1028.04.

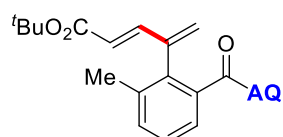

**Tert-butyl (*E*)-4-(2-methyl-6-(quinolin-8-ylcarbamoyl)phenyl)penta-2,4-dienoate (3d)**

Following the general procedure 1, **3d** was obtained as a white solid (57.2 mg, 92% yield, m.p.= 94-95 °C).

**<sup>1</sup>H NMR** (500 MHz, CDCl<sub>3</sub>)

δ 10.10 (s, 1H), 8.83 (dd, *J* = 7.5, 1.5 Hz, 1H), 8.72 (dd, *J* = 4.0, 1.5 Hz, 1H), 8.14 (dd, *J* = 8.0, 1.5 Hz, 1H), 7.66 – 7.65 (m, 1H), 7.56 – 7.50 (m, 2H), 7.45 (d, *J* = 15.5 Hz, 1H), 7.42 – 7.38 (m, 3H), 5.79 (s, 1H), 5.53 (d, *J* = 10.5 Hz, 1H), 5.52 (d, *J* = 3.5 Hz, 1H), 2.26 (s, 3H), 1.43 (s, 9H).

**<sup>13</sup>C NMR** (125 MHz, CDCl<sub>3</sub>)



$\delta$  166.52, 165.19, 147.13, 143.79, 143.06, 137.56, 136.42, 136.02, 135.15, 134.62, 133.75, 131.11, 127.03, 126.90, 126.33, 125.38, 124.87, 122.54, 120.63, 120.49, 115.49, 79.37, 27.11, 18.92.

**HRMS (ESI)** for  $C_{26}H_{27}N_2O_3$   $[M+H]^+$ : 415.2016, found: 415.2011.

**FTIR** (KBr,  $cm^{-1}$ )

3414.0, 3383.18, 2923.36, 2853.27, 1731.78, 1633.64, 1653.27, 1557.94, 1538.32, 1504.67, 1403.74, 1028.04.

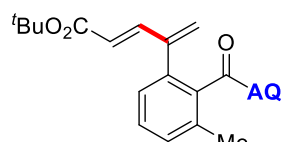

**Tert-butyl (*E*)-4-(3-methyl-2-(quinolin-8-ylcarbamoyl)phenyl)penta-2,4-dienoate (3e)**

Following the general procedure 1, **3e** was obtained as a white oil (31.8 mg, 51% yield).

**<sup>1</sup>H NMR** (500 MHz,  $CDCl_3$ )

$\delta$  9.84 (s, 1H), 8.83 (d,  $J = 7.0$  Hz, 1H), 8.66 (d,  $J = 4.0$  Hz, 1H), 8.14 (d,  $J = 8.5$  Hz, 1H), 7.57 – 7.51 (m, 2H), 7.39 (q,  $J = 4.0$  Hz, 1H), 7.36 (t,  $J = 7.5$  Hz, 1H), 7.31 (d,  $J = 15.5$  Hz, 1H), 7.28 (d,  $J = 7.5$  Hz, 1H), 7.10 (d,  $J = 7.5$  Hz, 1H), 5.71 (d,  $J = 16.0$  Hz, 1H), 5.59 (s, 1H), 5.54 (s, 1H), 2.50 (s, 3H), 1.42 (s, 9H).

**<sup>13</sup>C NMR** (125 MHz,  $CDCl_3$ )

$\delta$  166.51, 165.14, 147.12, 144.23, 143.59, 137.37, 136.27, 135.17, 134.94, 134.87, 133.43, 129.00, 127.87, 126.92, 126.33, 126.07, 125.03, 123.12, 120.76, 120.51, 115.39, 79.26, 27.09, 18.73.

**HRMS (ESI)** for  $C_{26}H_{26}N_2O_3Na$   $[M+Na]^+$ : 437.1836, found: 437.1838.

**FTIR** (KBr,  $cm^{-1}$ )

3655.14, 3629.91, 3573.83, 3528.97, 3489.72, 3453.27, 1709.35, 1678.5, 1656.07, 1630.84, 1524.3, 1482.24, 1385.92, 1328.04, 1271.96, 1151.4.

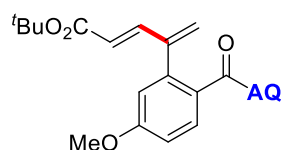

**Tert-butyl (*E*)-4-(5-methoxy-2-(quinolin-8-ylcarbamoyl)phenyl)penta-2,4-dienoate (3f)**

Following the general procedure 1, **3f** was obtained as a white

oil (40.4 mg, 63% yield).

**<sup>1</sup>H NMR** (500 MHz, CDCl<sub>3</sub>)

δ 10.25 (s, 1H), 8.82 (dd, *J* = 7.5, 1.5 Hz, 1H), 8.75 (dd, *J* = 4.0, 1.5 Hz, 1H), 8.15 (dd, *J* = 8.0, 1.5 Hz, 1H), 7.92 (d, *J* = 8.5 Hz, 1H), 7.55 – 7.49 (m, 2H), 7.46 (d, *J* = 16.0 Hz, 1H), 7.43 (q, 4.0 Hz, 1H), 7.01 (dd, *J* = 8.5, 2.5 Hz, 1H), 6.78 (d, *J* = 3.0 Hz, 1H), 5.76 (s, 1H), 5.64 (d, *J* = 5.0 Hz, 1H), 5.63 (d, *J* = 10.5 Hz, 1H), 3.89 (s, 3H), 1.38 (s, 9H).

**<sup>13</sup>C NMR** (125 MHz, CDCl<sub>3</sub>)

δ 165.30, 165.11, 160.13, 146.99, 144.40, 143.89, 137.80, 137.71, 135.15, 133.99, 130.01, 127.58, 126.92, 126.39, 124.79, 122.79, 120.50, 120.43, 115.40, 114.91, 112.46, 79.35, 54.50, 27.02.

**HRMS (ESI)** for C<sub>26</sub>H<sub>27</sub>N<sub>2</sub>O<sub>4</sub> [M+H]<sup>+</sup>: 431.1965, found: 431.1955.

**FTIR** (KBr, cm<sup>-1</sup>)

3441.33, 3417.07, 3383.91, 2920.56, 2853.27, 2354.21, 1650.47, 1636.45, 1406.54, 1019.63.

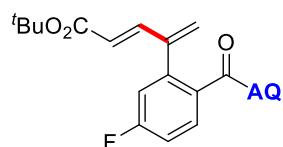

**Tert-butyl (*E*)-4-(5-fluoro-2-(quinolin-8-ylcarbamoyl)penta-2,4-dienoate (3g)**

Following the general procedure 1, **3g** was obtained as a white oil (35.7 mg, 57% yield).

**<sup>1</sup>H NMR** (500 MHz, CDCl<sub>3</sub>)

δ 10.21 (s, 1H), 8.80 (dd, *J* = 7.0, 1.5 Hz, 1H), 8.74 (dd, *J* = 4.0, 1.5 Hz, 1H), 8.16 (dd, *J* = 8.5, 1.5 Hz, 1H), 7.92 (dd, *J* = 8.5, 5.5 Hz, 1H), 7.56 – 7.51 (m, 2H), 7.45 – 7.42 (m, 2H), 7.22 – 7.18 (m, 1H), 7.00 (dd, *J* = 9.0, 2.5 Hz, 1H), 5.76 (s, 1H), 5.65 (d, *J* = 4.5 Hz, 1H), 5.63 (d, *J* = 11.5 Hz, 1H), 1.39 (s, 9H).

**<sup>13</sup>C NMR** (125 MHz, CDCl<sub>3</sub>)

δ 164.86, 164.73, 162.49 (d, *J*<sub>CF</sub> = 250.6 Hz), 147.12, 143.33, 143.26, 138.38 (d, *J*<sub>CF</sub> = 8.3 Hz), 137.60, 135.21, 133.61, 131.55 (d, *J*<sub>CF</sub> = 3.3 Hz), 130.35 (d, *J*<sub>CF</sub> = 8.9 Hz), 126.91, 126.34, 125.26,

123.04, 120.81, 120.61, 116.32 (d,  $J_{CF} = 21.9$  Hz), 115.51, 114.45 (d,  $J_{CF} = 21.3$  Hz), 79.52, 27.01.

**$^{19}\text{F}$  NMR** (471 MHz,  $\text{CDCl}_3$ )

$\delta$  -109.23.

**HRMS (ESI)** for  $\text{C}_{25}\text{H}_{24}\text{N}_2\text{O}_3\text{F}$   $[\text{M}+\text{H}]^+$ : 419.1765, found: 419.1755.

**FTIR** (KBr,  $\text{cm}^{-1}$ )

3419.63, 3385.98, 2926.17, 2853.27, 2348.60, 1653.27, 1633.64, 1400.93, 1028.04.

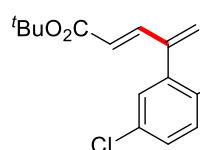

**Tert-butyl (*E*)-4-(5-chloro-2-(quinolin-8-ylcarbamoyl)penta-2,4-dienoate (**3h**)**

Following the general procedure 1, **3h** was obtained as a yellow oil (33.4 mg, 51% yield).

**$^1\text{H}$  NMR** (500 MHz,  $\text{CDCl}_3$ )

$\delta$  10.23 (s, 1H), 8.80 (dd,  $J = 6.5, 2.0$  Hz, 1H), 8.74 (dd,  $J = 4.0, 1.5$  Hz, 1H), 8.16 (dd,  $J = 8.5, 1.5$  Hz, 1H), 7.86 (d,  $J = 8.0$  Hz, 1H), 7.56 – 7.52 (m, 2H), 7.48 (dd,  $J = 8.5, 2.0$  Hz, 1H), 7.45 – 7.42 (m, 2H), 7.29 (d,  $J = 2.0$  Hz, 1H), 5.77 (s, 1H), 5.64 (s, 1H), 5.61 (d,  $J = 16.0$  Hz, 1H), 1.38 (s, 9H).

**$^{13}\text{C}$  NMR** (125 MHz,  $\text{CDCl}_3$ )

$\delta$  164.84, 164.65, 147.14, 143.35, 143.13, 137.59, 137.49, 135.54, 135.22, 133.72, 133.54, 129.43, 129.29, 127.58, 126.91, 126.33, 125.40, 123.11, 120.90, 120.63, 115.57, 79.54, 27.00.

**HRMS (ESI)** for  $\text{C}_{25}\text{H}_{24}\text{N}_2\text{O}_3\text{Cl}$   $[\text{M}+\text{H}]^+$ : 435.147, found: 435.148.

**FTIR** (KBr,  $\text{cm}^{-1}$ )

3444.50, 3417.71, 3383.11, 2920.31, 2856.07, 1684.11, 1653.27, 1633.64, 1541.12, 1471.03, 1398.13, 1022.43.

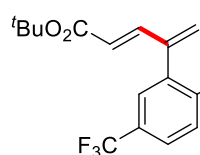

**Tert-butyl (*E*)-4-(2-(quinolin-8-ylcarbamoyl)-5-(trifluoromethyl)phenyl)penta-2,4-dienoate (**3i**)**

Following the general procedure 1, **3i** was obtained as a white

solid (35.2 mg, 50% yield, m.p. = 137-138 °C).

**<sup>1</sup>H NMR** (500 MHz, CDCl<sub>3</sub>)

δ 10.26 (s, 1H), 8.80 (q, *J* = 3.0 Hz, 1H), 8.74 (dd, *J* = 4.0, 1.5 Hz, 1H), 8.17 (dd, *J* = 8.5, 1.5 Hz, 1H), 8.01 (d, *J* = 8.0 Hz, 1H), 7.77 (dd, *J* = 8.0, 1.0 Hz, 1H), 7.57 – 7.55 (m, 3H), 7.46 – 7.43 (m, 2H), 5.80 (s, 1H), 5.67 (s, 1H), 5.57 (d, *J* = 16.0 Hz, 1H), 1.37 (s, 9H).

**<sup>13</sup>C NMR** (125 MHz, CDCl<sub>3</sub>)

δ 164.72, 164.42, 147.22, 143.20, 143.05, 138.61, 137.54, 136.53, 135.26, 133.32, 131.48 (q, *J*<sub>CF</sub> = 32.6 Hz), 128.43, 126.91, 126.31, 126.24 (q, *J*<sub>CF</sub> = 3.9 Hz), 125.71, 124.34 (q, *J*<sub>CF</sub> = 3.6 Hz), 123.21, 122.506 (q, *J*<sub>CF</sub> = 271.0 Hz), 121.14, 120.69, 115.67, 79.60, 26.98.

**HRMS (ESI)** for C<sub>26</sub>H<sub>24</sub>N<sub>2</sub>O<sub>3</sub>F<sub>3</sub> [M+H]<sup>+</sup>: 469.1734, found: 469.1730.

**FTIR** (KBr, cm<sup>-1</sup>)

3507.53, 3472.90, 3444.73, 3417.40, 3383.33, 3362.80, 2917.76, 2853.27, 2354.21, 1557.94, 1656.07, 1636.45, 1507.48, 1471.03, 1409.35, 1022.43.

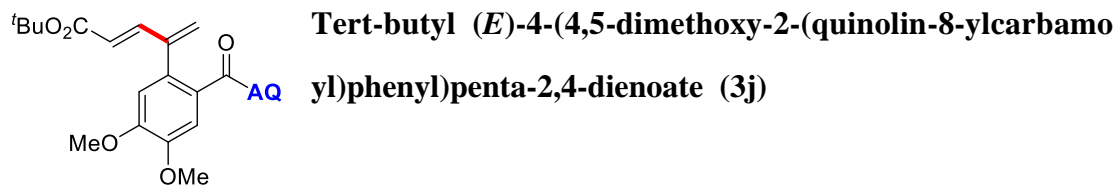

Following the general procedure 1, **3j** was obtained as a colorless oil (50.9 mg, 74% yield).

**<sup>1</sup>H NMR** (500 MHz, CDCl<sub>3</sub>)

δ 10.29 (s, 1H), 8.83 (dd, *J* = 7.5, 1.5 Hz, 1H), 8.74 (dd, *J* = 4.0, 1.5 Hz, 1H), 8.14 (dd, *J* = 8.0, 1.5 Hz, 1H), 7.56 – 7.51 (m, 3H), 7.47 (d, *J* = 15.5 Hz, 1H), 7.42 (q, *J* = 4.0 Hz, 1H), 6.72 (s, 1H), 5.78 (s, 1H), 5.67 (s, 1H), 5.66 (d, *J* = 15.5 Hz, 1H), 3.99 (s, 3H), 3.95 (s, 3H), 1.41 (s, 9H).

**<sup>13</sup>C NMR** (125 MHz, CDCl<sub>3</sub>)

δ 165.25, 165.17, 149.58, 147.66, 147.00, 144.28, 144.14, 137.75, 135.12, 133.98, 128.81, 127.36, 126.92, 126.36, 125.44, 122.94,

120.54, 120.52, 115.41, 111.77, 111.13, 79.43, 55.15, 55.11, 27.06.

**HRMS (ESI)** for C<sub>27</sub>H<sub>29</sub>N<sub>2</sub>O<sub>5</sub> [M+H]<sup>+</sup>: 461.2071, found: 461.2067.

**FTIR** (KBr, cm<sup>-1</sup>)

3444.86, 3417.79, 3385.98, 2920.56, 2850.47, 2357.01, 1684.11,  
1650.47, 1633.64, 1538.32, 1405.54, 1022.43, 795.33.

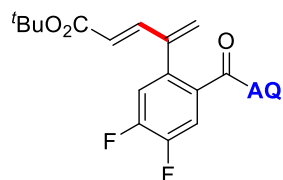

**Tert-butyl (*E*)-4-(4,5-difluoro-2-(quinolin-8-ylcarbamoyl)phenyl)penta-2,4-dienoate (3k)**

Following the general procedure 1, **3k** was obtained as a colorless oil (26.8mg, 41% yield).

**<sup>1</sup>H NMR** (500 MHz, CDCl<sub>3</sub>)

δ 10.24 (s, 1H), 8.78 (dd, *J* = 5.5, 3.5 Hz, 1H), 8.74 (dd, *J* = 4.0, 1.5 Hz, 1H), 8.16 (dd, *J* = 8.5, 1.5 Hz, 1H), 7.78 (dd, *J* = 10.5, 8.0 Hz, 1H), 7.55 – 7.54 (m, 2H), 7.46 – 7.42 (m, 2H), 7.11 (dd, *J* = 10.0, 7.5 Hz, 1H), 5.78 (s, 1H), 5.65 (s, 1H), 5.61 (d, *J* = 15.5 Hz, 1H), 1.40 (s, 9H).

**<sup>13</sup>C NMR** (125 MHz, CDCl<sub>3</sub>)

δ 164.74, 163.30, 148.50 (dd, *J*<sub>CF</sub> = 165.0, 12.5 Hz), 147.19, 144.08 (dd, *J*<sub>CF</sub> = 223.0, 3.5 Hz), 143.25, 142.40, 137.58, 135.24, 133.36, 132.80 (d, *J*<sub>CF</sub> = 4.6 Hz), 132.09 (d, *J*<sub>CF</sub> = 4.1 Hz), 126.91, 126.30, 125.88, 123.24, 121.09, 120.69, 118.39 (d, *J*<sub>CF</sub> = 17.6 Hz), 117.66 (d, *J*<sub>CF</sub> = 18.6 Hz), 115.65, 79.66, 27.01.

**<sup>19</sup>F NMR** (471 MHz, CDCl<sub>3</sub>)

δ -133.48, -136.73.

**HRMS (ESI)** for C<sub>25</sub>H<sub>23</sub>N<sub>2</sub>O<sub>3</sub>F<sub>2</sub> [M+H]<sup>+</sup>: 437.1671, found: 437.1678.

**FTIR** (KBr, cm<sup>-1</sup>)

3507.53, 3472.90, 3444.73, 3417.40, 3383.33, 3362.80, 2917.76,  
2853.27, 2354.21, 1557.94, 1656.07, 1636.45, 1507.48, 1471.03,  
1409.35, 1022.43.

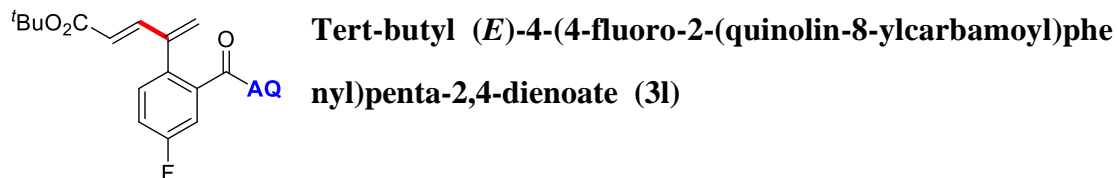

Following the general procedure 1, **3l** was obtained as a white oil (29.7 mg, 47% yield).

**<sup>1</sup>H NMR** (500 MHz, CDCl<sub>3</sub>)

δ 10.24 (s, 1H), 8.80 (dd, *J* = 6.5, 2.5 Hz, 1H), 8.74 (dd, *J* = 4.0, 1.5 Hz, 1H), 8.16 (dd, *J* = 8.5, 1.5 Hz, 1H), 7.61 (dd, *J* = 9.0, 2.5 Hz, 1H), 7.57 – 7.52 (m, 2H), 7.46 – 7.42 (m, 2H), 7.29 – 7.26 (m, 1H), 7.24 – 7.21 (m, 1H), 5.75 (s, 1H), 5.62 (s, 1H), 5.60 (d, *J* = 15.5 Hz, 1H), 1.38 (s, 9H).

**<sup>13</sup>C NMR** (125 MHz, CDCl<sub>3</sub>)

δ 164.95, 164.34, 161.25 (d, *J*<sub>CF</sub> = 247.5 Hz), 147.17, 143.92, 143.25, 137.60, 137.21 (d, *J*<sub>CF</sub> = 6.8 Hz), 135.21, 133.45, 131.61 (d, *J*<sub>CF</sub> = 3.5 Hz), 131.29 (d, *J*<sub>CF</sub> = 7.9 Hz), 126.91, 126.32, 125.47, 122.99, 120.98, 120.64, 116.61 (d, *J*<sub>CF</sub> = 21.2 Hz), 115.63, 114.97 (d, *J*<sub>CF</sub> = 23.0 Hz), 79.46, 27.01.

**<sup>19</sup>F NMR** (471 MHz, CDCl<sub>3</sub>)

δ -112.63.

**HRMS (ESI)** for C<sub>25</sub>H<sub>24</sub>N<sub>2</sub>O<sub>3</sub>F [M+H]<sup>+</sup>: 419.1765, found: 419.1766.

**FTIR** (KBr, cm<sup>-1</sup>)

3629.91, 3442.06, 3419.63, 2926.17, 2357.01, 1737.38, 1681.31, 1651.38, 1557.10, 1538.04, 1504.82, 1392.52, 1022.43.

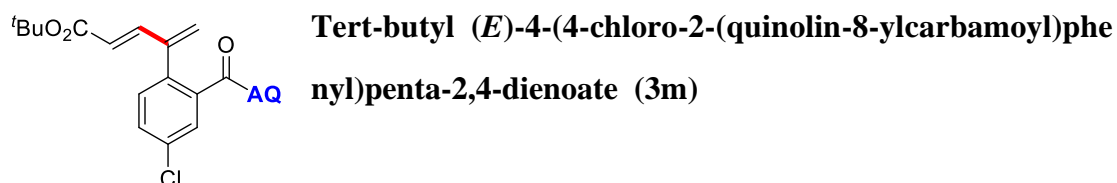

Following the general procedure 1, **3m** was obtained as a white oil (38.8 mg, 60% yield).

**<sup>1</sup>H NMR** (500 MHz, CDCl<sub>3</sub>)

δ 10.21 (s, 1H), 8.79 (dd, *J* = 6.5, 2.5 Hz, 1H), 8.74 (dd, *J* = 4.0, 1.5

Hz, 1H), 8.16 (dd,  $J = 8.0, 1.5$  Hz, 1H), 7.88 (d,  $J = 2.0$  Hz, 1H), 7.55 – 7.53 (m, 2H), 7.49 (dd,  $J = 8.0, 2.5$  Hz, 1H), 7.45 – 7.42 (m, 2H), 7.24 (d,  $J = 8.5$  Hz, 1H), 5.74 (s, 1H), 5.63 – 5.59 (m, 2H), 1.38 (s, 9H).

**<sup>13</sup>C NMR** (125 MHz, CDCl<sub>3</sub>)

$\delta$  164.89, 164.30, 147.18, 143.62, 143.14, 137.57, 136.86, 135.21, 134.06, 133.42, 130.77, 129.57, 127.94, 126.90, 126.31, 125.36, 123.05, 121.00, 120.64, 115.63, 79.48, 27.00.

**HRMS (ESI)** for C<sub>25</sub>H<sub>24</sub>N<sub>2</sub>O<sub>3</sub>Cl [M+H]<sup>+</sup>: 435.147, found: 435.1479.

**FTIR** (KBr, cm<sup>-1</sup>)

3447.66, 3416.82, 3385.98, 2923.36, 2853.27, 1684.11, 1656.07, 1636.45, 1560.75, 1541.12, 1403.04, 1022.43.

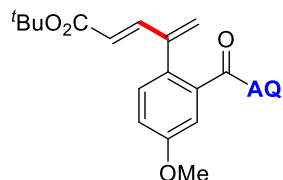

**Tert-butyl (*E*)-4-(4-methoxy-2-(quinolin-8-ylcarbamoyl)phenyl)penta-2,4-dienoate (**3n**)**

Following the general procedure 1, **3n** was obtained as a colorless oil (51.9 mg, 80% yield).

**<sup>1</sup>H NMR** (500 MHz, CDCl<sub>3</sub>)

$\delta$  10.22 (s, 1H), 8.82 (dd,  $J = 7.0, 1.5$  Hz, 1H), 8.73 (dd,  $J = 4.0, 1.5$  Hz, 1H), 8.14 (dd,  $J = 8.0, 1.5$  Hz, 1H), 7.56 – 7.51 (m, 2H), 7.46 – 7.41 (m, 3H), 7.21 (d,  $J = 8.5$  Hz, 1H), 7.06 (dd,  $J = 8.5, 2.5$  Hz, 1H), 5.70 (s, 1H), 5.66 (d,  $J = 16.0$  Hz, 1H), 5.60 (s, 1H), 3.90 (s, 3H), 1.38 (s, 9H).

**<sup>13</sup>C NMR** (125 MHz, CDCl<sub>3</sub>)

$\delta$  165.66, 165.16, 158.37, 147.08, 144.42, 143.81, 137.63, 136.50, 135.13, 133.70, 130.66, 127.86, 126.90, 126.33, 125.06, 122.73, 120.72, 120.56, 115.84, 115.48, 112.44, 79.27, 54.54, 27.03.

**HRMS (ESI)** for C<sub>26</sub>H<sub>27</sub>N<sub>2</sub>O<sub>4</sub> [M+H]<sup>+</sup>: 431.1965, found: 431.1955.

**FTIR** (KBr, cm<sup>-1</sup>)

3385.98, 3355.14, 2926.17, 2847.66, 1653.27, 1633.64, 1402.90, 1137.38, 1044.86.

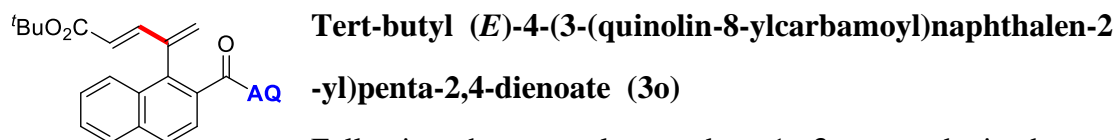

Following the general procedure 1, **3o** was obtained as a colorless oil (42.9 mg, 64% yield).

**<sup>1</sup>H NMR** (500 MHz, CDCl<sub>3</sub>)

δ 10.29 (s, 1H), 8.90 (dd, *J* = 7.5, 1.0 Hz, 1H), 8.73 (dd, *J* = 4.0, 1.5 Hz, 1H), 8.16 (dd, *J* = 8.0, 1.5 Hz, 1H), 7.99 (d, *J* = 8.5 Hz, 1H), 7.93 – 7.91 (m, 2H), 7.88 (d, *J* = 8.5 Hz, 1H), 7.63 (d, *J* = 16.0 Hz, 1H), 7.60 – 7.52 (m, 4H), 7.42 (q, *J* = 4.0 Hz, 1H), 6.03 (s, 1H), 5.72 (s, 1H), 5.43 (d, *J* = 15.5 Hz, 1H), 1.40 (s, 9H).

**<sup>13</sup>C NMR** (125 MHz, CDCl<sub>3</sub>)

δ 166.41, 165.13, 147.19, 144.38, 141.95, 137.64, 135.16, 133.77, 133.17, 133.09, 132.95, 130.42, 127.79, 127.10, 127.07, 126.93, 126.36, 126.19, 126.07, 126.00, 124.15, 123.63, 120.76, 120.53, 115.59, 79.45, 27.07.

**HRMS (ESI)** for C<sub>29</sub>H<sub>27</sub>N<sub>2</sub>O<sub>3</sub> [M+H]<sup>+</sup>: 451.2016, found: 451.2006.

**FTIR** (KBr, cm<sup>-1</sup>)

3383.09, 3354.97, 2968.22, 2920.56, 1684.11, 1670.09, 1656.07, 1560.75, 1535.51, 1406.54, 1137.38, 1042.06, 994.39, 924.30, 837.38.

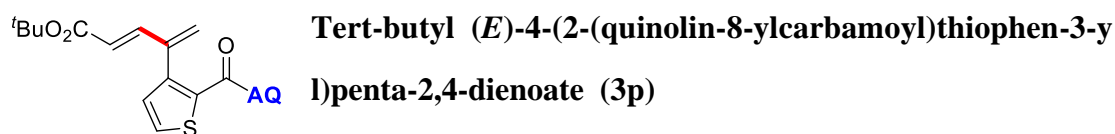

Following the general procedure 1, **3p** was obtained as a yellow solid (25.2 mg, 41% yield, m.p. = 105-106 °C).

**<sup>1</sup>H NMR** (500 MHz, CDCl<sub>3</sub>)

δ 10.62 (s, 1H), 8.82 – 8.80 (m, 2H), 8.15 (dd, *J* = 8.5, 1.5 Hz, 1H), 7.63 (d, *J* = 15.5 Hz, 1H), 7.56 – 7.50 (m, 3H), 7.45 (q, *J* = 4.0 Hz, 1H), 6.97 (d, *J* = 5.0 Hz, 1H), 6.07 (s, 1H), 5.81 (s, 1H), 5.61 (d, *J* = 16.0 Hz, 1H), 1.41 (s, 9H).



**<sup>13</sup>C NMR** (125 MHz, CDCl<sub>3</sub>)

δ 164.92, 158.99, 147.01, 143.39, 139.61, 137.82, 137.61, 136.40, 135.11, 133.79, 129.64, 128.79, 127.16, 126.90, 126.35, 123.36, 120.69, 120.58, 115.76, 79.62, 27.03.

**HRMS (ESI)** for C<sub>23</sub>H<sub>23</sub>N<sub>2</sub>O<sub>3</sub> [M+H]<sup>+</sup>: 407.1424, found: 407.1432.

**FTIR** (KBr, cm<sup>-1</sup>)

3444.44, 3417.24, 3383.14, 2923.36, 2850.47, 1653.27, 1633.64, 1560.75, 1535.51, 1507.48, 1473.83, 1025.23.

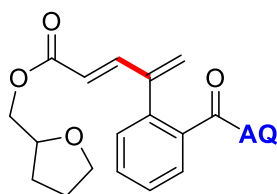

(Tetrahydrofuran-2-yl)methyl (*E*)-4-(2-(quinolin-8-ylcarbonyl)phenyl)penta-2,4-dienoate (**3q**)

Following the general procedure 1, **3q** was obtained as a white oil (38.3 mg, 60% yield).

**<sup>1</sup>H NMR** (500 MHz, CDCl<sub>3</sub>)

δ 10.21 (s, 1H), 8.82 (dd, *J* = 7.0, 1.5 Hz, 1H), 8.73 (dd, *J* = 4.0, 1.5 Hz, 1H), 8.15 (dd, *J* = 8.0, 1.5 Hz, 1H), 7.90 – 7.88 (m, 1H), 7.59 (d, *J* = 15.5 Hz, 1H), 7.56 – 7.50 (m, 4H), 7.43 (q, *J* = 4.0 Hz, 1H), 7.29 – 7.27 (m, 1H), 5.78 (s, 1H), 5.76 (d, *J* = 15.5 Hz, 1H), 5.66 (s, 1H), 4.16 (dd, *J* = 10.5, 3.5 Hz, 1H), 4.06 – 4.03 (m, 1H), 4.02 – 3.98 (m, 1H), 3.84 – 3.80 (m, 1H), 3.76 – 3.71 (m, 1H), 1.96 – 1.90 (m, 1H), 1.88 – 1.81 (m, 2H), 1.55 – 1.50 (m, 1H).

**<sup>13</sup>C NMR** (125 MHz, CDCl<sub>3</sub>)

δ 165.73, 165.69, 147.15, 145.60, 144.17, 137.62, 135.46, 135.36, 135.15, 133.69, 129.55, 129.41, 127.85, 127.45, 126.90, 126.34, 125.65, 120.70, 120.62, 120.58, 115.51, 75.43, 67.34, 65.43, 26.94, 24.55.

**HRMS (ESI)** for C<sub>26</sub>H<sub>25</sub>N<sub>2</sub>O<sub>4</sub> [M+H]<sup>+</sup>: 429.1809, found: 429.1815.

**FTIR** (KBr, cm<sup>-1</sup>)

3444.28, 3417.37, 3383.59, 2926.17, 2850.47, 1653.27, 1636.45, 1557.94, 1535.51, 1507.48, 1400.93, 1016.82.

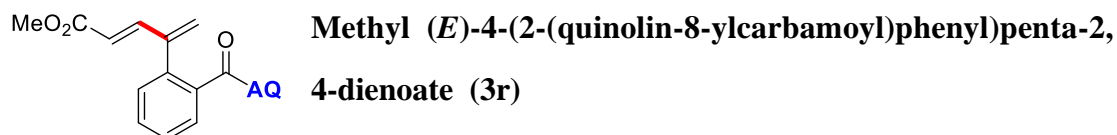

Following the general procedure 1, **3r** was obtained as a yellow oil (31.7 mg, 59% yield).

**<sup>1</sup>H NMR** (500 MHz, CDCl<sub>3</sub>)

δ 10.21 (s, 1H), 8.82 (dd, *J* = 7.0, 1.5 Hz, 1H), 8.71 (dd, *J* = 4.0, 1.5 Hz, 1H), 8.15 (dd, *J* = 8.0, 1.5 Hz, 1H), 7.90 – 7.89 (m, 1H), 7.57 – 7.51 (m, 5H), 7.43 (q, *J* = 4.0 Hz, 1H), 7.30 – 7.28 (m, 1H), 5.77 (s, 1H), 5.71 (d, *J* = 15.5 Hz, 1H), 5.67 (s, 1H), 3.66 (s, 3H).

**<sup>13</sup>C NMR** (125 MHz, CDCl<sub>3</sub>)

δ 166.22, 165.74, 147.06, 145.29, 144.20, 137.62, 135.43, 135.40, 135.20, 133.66, 129.57, 129.35, 128.89, 127.86, 127.47, 126.92, 126.36, 125.55, 120.74, 120.59, 115.53, 50.51.

**HRMS (ESI)** for C<sub>22</sub>H<sub>19</sub>N<sub>2</sub>O<sub>3</sub> [M+H]<sup>+</sup>: 359.1390, found: 359.1386.

**FTIR** (KBr, cm<sup>-1</sup>)

3442.06, 3419.63, 3383.18, 3175.70, 2351.40, 1656.07, 1557.94, 1541.12, 1504.67, 1457.01, 1402.85, 1030.84.

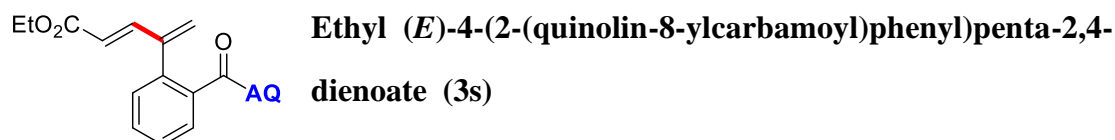

Following the general procedure 1, **3s** was obtained as a yellow oil (36.3 mg, 65% yield).

**<sup>1</sup>H NMR** (500 MHz, CDCl<sub>3</sub>)

δ 10.21 (s, 1H), 8.82 (d, *J* = 7.5 Hz, 1H), 8.71 (dd, *J* = 4.0, 1.5 Hz, 1H), 8.15 (dd, *J* = 8.0, 1.5 Hz, 1H), 7.90 (dd, *J* = 6.5, 2.5 Hz, 1H), 7.57 - 7.49 (m, 5H), 7.43 (q, *J* = 4.0 Hz, 1H), 7.29 (dd, *J* = 7.0, 1.5 Hz, 1H), 5.77 (s, 1H), 5.70 (d, *J* = 15.5 Hz, 1H), 5.66 (s, 1H), 4.12 (q, *J* = 7.5 Hz, 2H), 1.20 (t, *J* = 7.0 Hz, 3H).

**<sup>13</sup>C NMR** (125 MHz, CDCl<sub>3</sub>)

δ 165.78, 165.75, 147.06, 145.03, 144.22, 137.62, 135.53, 135.40,

135.19, 133.68, 129.55, 129.37, 127.84, 127.44, 126.92, 126.36,  
125.39, 121.04, 120.72, 120.58, 115.52, 59.34, 13.15.

**HRMS (ESI)** for C<sub>23</sub>H<sub>21</sub>N<sub>2</sub>O<sub>3</sub> [M+H]<sup>+</sup>: 373.1547, found: 373.1540.

**FTIR** (KBr, cm<sup>-1</sup>)

3851.40, 3744.86, 3646.73, 3587.85, 3178.50, 2926.17, 2850.47,  
2354.21, 1656.07, 1636.45, 1504.67, 1402.84, 1022.43.

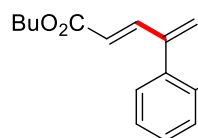

**Butyl (*E*)-4-(2-(quinolin-8-ylcarbamoyl)phenyl)penta-2,4-dienoate (3t)**

Following the general procedure 1, **3t** was obtained as a colorless oil (36.4 mg, 61% yield).

**<sup>1</sup>H NMR** (500 MHz, CDCl<sub>3</sub>)

δ 10.22 (s, 1H), 8.82 (dd, *J* = 7.0, 1.5 Hz, 1H), 8.71 (dd, *J* = 4.0, 1.5 Hz, 1H), 8.15 (dd, *J* = 8.0, 1.5 Hz, 1H), 7.90 (dd, *J* = 6.5, 2.5 Hz, 1H), 7.56 – 7.50 (m, 5H), 7.43 (dd, *J* = 8.0, 4.0 Hz, 1H), 7.30 (dd, *J* = 6.5, 2.5 Hz, 1H), 5.77 (s, 1H), 5.70 (d, *J* = 15.5 Hz, 1H), 5.66 (s, 1H), 4.06 (t, *J* = 6.5 Hz, 2H), 1.55 – 1.50 (m, 2H), 1.32 – 1.29 (m, 2H), 0.87 (t, *J* = 7.5 Hz, 3H).

**<sup>13</sup>C NMR** (125 MHz, CDCl<sub>3</sub>)

δ 165.90, 165.77, 147.07, 144.98, 144.24, 137.61, 135.56, 135.39, 135.19, 133.67, 129.58, 129.39, 127.81, 127.44, 126.91, 126.35, 125.39, 120.98, 120.73, 120.57, 115.51, 63.27, 29.60, 18.04, 12.64.

**HRMS (ESI)** for C<sub>25</sub>H<sub>25</sub>N<sub>2</sub>O<sub>3</sub> [M+H]<sup>+</sup>: 401.186, found: 401.1863.

**FTIR** (KBr, cm<sup>-1</sup>)

3750.47, 3627.36, 3568.22, 3422.43, 3383.18, 3357.94, 3144.86, 2965.42, 2923.36, 2357.01, 2320.56, 1653.27, 1557.94, 1541.12, 1403.74, 1025.23.

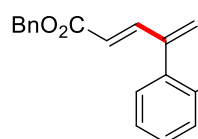

**Benzyl (*E*)-4-(2-(quinolin-8-ylcarbamoyl)phenyl)penta-2,4-dienoate (3u)**

Following the general procedure 1, **3u** was obtained as a

white oil (37.7 mg, 58% yield).

**<sup>1</sup>H NMR** (500 MHz, CDCl<sub>3</sub>)

δ 10.19 (s, 1H), 8.82 (dd, *J* = 7.0, 1.0 Hz, 1H), 8.59 (dd, *J* = 4.0, 1.5 Hz, 1H), 8.13 (dd, *J* = 8.0, 1.5 Hz, 1H), 7.88 (dd, *J* = 6.0, 2.5 Hz, 1H), 7.59 (d, *J* = 15.5 Hz, 1H), 7.55 – 7.50 (m, 4H), 7.37 (q, *J* = 4.0 Hz, 1H), 7.32 – 7.27 (m, 6H), 5.77 (d, *J* = 7.5 Hz, 1H), 5.76 (d, *J* = 8.5 Hz, 1H), 5.65 (s, 1H), 5.12 (s, 2H).

**<sup>13</sup>C NMR** (125 MHz, CDCl<sub>3</sub>)

δ 165.74, 165.59, 147.09, 145.63, 144.15, 137.58, 137.39, 135.43, 135.41, 135.13, 134.84, 133.65, 129.54, 129.35, 127.85, 127.48, 127.28, 127.16, 126.89, 126.34, 125.72, 120.72, 120.64, 120.58, 115.50, 65.23.

**HRMS (ESI)** for C<sub>28</sub>H<sub>23</sub>N<sub>2</sub>O<sub>3</sub> [M+H]<sup>+</sup>: 435.1703, found: 435.1707.

**FTIR** (KBr, cm<sup>-1</sup>)

3742.53, 3646.33, 3626.88, 3564.79, 3444.86, 3383.18, 3212.15, 3147.66, 2351.40, 1650.47, 1557.94, 1541.12, 1504.67, 1406.54, 1022.43, 798.13.

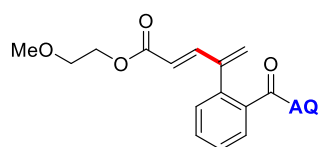

**2-Methoxyethyl (*E*)-4-(2-(quinolin-8-ylcarbonyl)phenyl)penta-2,4-dienoate (**3v**)**

Following the general procedure 1, **3v** was obtained as a yellow oil (32.0 mg, 53% yield).

**<sup>1</sup>H NMR** (500 MHz, CDCl<sub>3</sub>)

δ 10.21 (s, 1H), 8.82 (dd, *J* = 7.5, 1.5 Hz, 1H), 8.72 (dd, *J* = 4.0, 1.5 Hz, 1H), 8.15 (dd, *J* = 8.0, 1.5 Hz, 1H), 7.90 (dd, *J* = 6.0, 2.5 Hz, 1H), 7.59 (d, *J* = 15.5 Hz, 1H), 7.56 – 7.49 (m, 4H), 7.43 (dd, *J* = 8.0, 4.0 Hz, 1H), 7.28 (dd, *J* = 6.0, 3.0 Hz, 1H), 5.78 (s, 1H), 5.77 (d, *J* = 15.5 Hz, 1H), 5.66 (s, 1H), 4.23 (t, *J* = 5.0 Hz, 2H), 3.55 (t, *J* = 5.0 Hz, 2H), 3.33 (s, 3H).

**<sup>13</sup>C NMR** (125 MHz, CDCl<sub>3</sub>)

δ 165.76, 165.70, 147.13, 145.65, 144.16, 137.62, 135.45, 135.38,

135.17, 133.68, 129.55, 129.40, 127.87, 127.45, 126.91, 126.35,  
125.69, 120.72, 120.61, 120.59, 115.52, 69.38, 62.44, 57.93.

**HRMS (ESI)** for  $C_{24}H_{23}N_2O_4$   $[M+H]^+$ : 403.1652, found: 403.1657.

**FTIR** (KBr,  $cm^{-1}$ )

3565.42, 3442.06, 3416.82, 2962.62, 2354.21, 1653.27, 1560.75,  
1543.93, 1507.48, 1409.35, 1028.04.

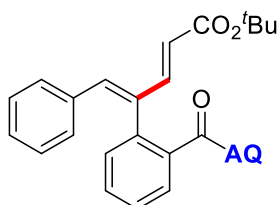

**Tert-butyl (2E,4Z)-5-phenyl-4-(2-(quinolin-8-ylcarbamoyl)phenyl)penta-2,4-dienoate (3w)**

Following the general procedure 1, **3w** was obtained as a white solid (62.0 mg, 87% yield, m.p. = 57-58 °C).

**<sup>1</sup>H NMR** (500 MHz,  $CDCl_3$ )

$\delta$  10.33 (s, 1H), 8.78 (dd,  $J = 7.5, 2.0$  Hz, 1H), 8.50 (dd,  $J = 4.0, 1.5$  Hz, 1H), 8.09 – 8.05 (m, 2H), 7.64 (d,  $J = 16.0$  Hz, 1H), 7.59 – 7.55 (m, 2H), 7.50 – 7.44 (m, 2H), 7.35 (dd,  $J = 8.0, 4.0$  Hz, 1H), 7.24 – 7.22 (m, 1H), 7.11 – 7.08 (m, 3H), 7.04 (s, 1H), 6.99 – 6.97 (m, 2H), 5.47 (d,  $J = 15.5$  Hz, 1H), 1.40 (s, 9H).

**<sup>13</sup>C NMR** (125 MHz,  $CDCl_3$ )

$\delta$  165.35, 164.92, 147.15, 146.78, 138.59, 137.63, 136.54, 135.27, 134.97, 134.56, 134.28, 133.87, 130.67, 129.76, 128.78, 128.75, 127.61, 127.32, 127.28, 126.74, 126.26, 121.30, 120.53, 120.40, 115.55, 79.18, 27.08.

**HRMS (ESI)** for  $C_{31}H_{28}N_2O_3Na$   $[M+Na]^+$ : 499.1992, found: 499.1977.

**FTIR** (KBr,  $cm^{-1}$ )

3851.40, 3744.86, 3629.91, 3568.22, 3468.22, 3458.88, 3442.06,  
3416.82, 3385.98, 1686.92, 1653.27, 1636.45, 1538.32, 1510.28,  
1403.74, 1025.23.

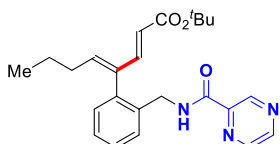

**Tert-butyl (2E,4Z)-4-(2-((pyrazine-2-carboxamido)methyl)phenyl)octa-2,4-dienoate (3x)**

Following the general procedure 1, **3x** was obtained as a yellow oil (56.0 mg, 92% yield).

**<sup>1</sup>H NMR** (500 MHz, CDCl<sub>3</sub>)

δ 9.40 (d, *J* = 1.5 Hz, 1H), 8.72 (d, *J* = 2.5 Hz, 1H), 8.47 – 8.46 (m, 1H), 7.91 (s, 1H), 7.49 – 7.47 (m, 1H), 7.44 (d, *J* = 15.5 Hz, 1H), 7.36 – 7.32 (m, 2H), 7.04 – 7.02 (m, 1H), 6.24 (t, *J* = 7.5 Hz, 1H), 5.13 (d, *J* = 15.5 Hz, 1H), 4.52 (dd, *J* = 15.0, 6.0 Hz, 1H), 4.45 (dd, *J* = 14.5, 5.5 Hz, 1H), 1.96 – 1.85 (m, 2H), 1.42 (s, 9H), 1.40 – 1.37 (m, 2H), 0.84 (t, *J* = 7.5 Hz, 3H).

**<sup>13</sup>C NMR** (125 MHz, CDCl<sub>3</sub>)

δ 165.39, 161.56, 146.17, 143.41, 143.33, 142.28, 141.45, 137.37, 135.14, 134.63, 129.12, 128.04, 127.21, 127.06, 119.84, 104.78, 79.14, 40.27, 30.88, 27.11, 21.15, 12.81.

**HRMS (ESI)** for C<sub>24</sub>H<sub>29</sub>N<sub>3</sub>O<sub>3</sub>Na [M+Na]<sup>+</sup>: 430.2101, found: 430.2101.

**FTIR** (KBr, cm<sup>-1</sup>)

3854.21, 3747.56, 3635.51, 3416.82, 3332.71, 3192.52, 3063.55, 3004.67, 2957.01, 2923.36, 1737.38, 1686.92, 1653.27, 1557.94, 1507.48, 1459.81, 1400.93, 1025.23.

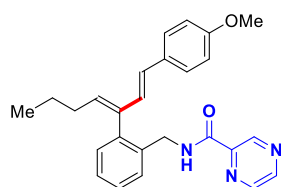

***N*-(2-((1*E*,3*Z*)-1-(4-methoxyphenyl)hepta-1,3-dien-3-yl)benzyl)pyrazine-2-carboxamide (**3y**)**

Following the general procedure 1, **3y** was obtained as a brown oil (50.7 mg, 82% yield).

**<sup>1</sup>H NMR** (500 MHz, CDCl<sub>3</sub>)

δ 9.32 (d, *J* = 1.5 Hz, 1H), 8.54 (d, *J* = 2.5 Hz, 1H), 8.01 (dd, *J* = 2.5, 1.5 Hz, 1H), 7.98 (s, 1H), 7.54 – 7.51 (m, 1H), 7.38 – 7.34 (m, 2H), 7.17 – 7.14 (m, 2H), 7.12 – 7.10 (m, 1H), 6.93 (d, *J* = 16.0 Hz, 1H), 6.78 – 6.75 (m, 2H), 5.94 (t, *J* = 7.5 Hz, 1H), 5.76 (d, *J* = 16.0 Hz, 1H), 4.62 (dd, *J* = 14.5, 6.5 Hz, 1H), 4.46 (dd, *J* = 14.5, 5.5 Hz, 1H), 3.79 (s, 3H), 1.93 – 1.79 (m, 2H), 1.43 – 1.35 (m, 2H), 0.85 (t,

$J = 7.5$  Hz, 3H).

**$^{13}\text{C}$  NMR** (125 MHz,  $\text{CDCl}_3$ )

$\delta$  161.42, 157.89, 145.82, 143.31, 143.16, 141.20, 138.72, 136.93, 134.84, 133.69, 130.04, 129.39, 129.19, 128.45, 128.05, 126.95, 126.78, 126.40, 112.83, 54.28, 40.63, 30.53, 21.62, 12.86.

**HRMS (ESI)** for  $\text{C}_{26}\text{H}_{28}\text{N}_3\text{O}_2\text{Na}$   $[\text{M} + \text{Na}]^+$ : 436.1995, found: 436.1979.

**FTIR** (KBr,  $\text{cm}^{-1}$ )

3854.21, 3744.86, 3649.53, 3624.30, 3565.42, 3444.86, 3315.89, 3060.75, 2957.01, 2354.21, 1681.31, 1653.27, 1563.55, 1535.51, 1507.48, 1459.81, 1395.33, 1022.43, 666.36.

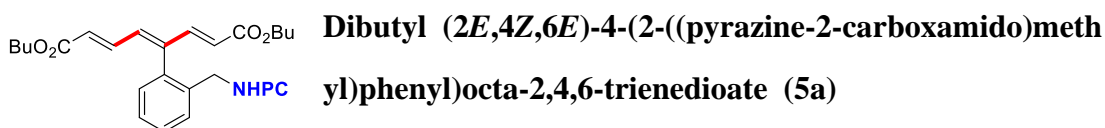

Following the general procedure 1, **5a** was obtained as a colorless oil (73.7mg, 81% yield).

**$^1\text{H}$  NMR** (500 MHz,  $\text{CDCl}_3$ )

$\delta$  9.35 (d,  $J = 1.0$  Hz, 1H), 8.69 (d,  $J = 2.5$  Hz, 1H), 8.39 (q,  $J = 1.5$  Hz, 1H), 7.86 (t,  $J = 5.5$  Hz, 1H), 7.57 (d,  $J = 15.5$  Hz, 1H), 7.53 (d,  $J = 7.5$  Hz, 1H), 7.44 – 7.37 (m, 2H), 7.06 (dd,  $J = 7.5, 1.0$  Hz, 1H), 6.92 (dd,  $J = 15.0, 11.5$  Hz, 1H), 6.79 (d,  $J = 12.0$  Hz, 1H), 6.05 (d,  $J = 15.0$  Hz, 1H), 5.45 (d,  $J = 15.5$  Hz, 1H), 4.51 – 4.38 (m, 2H), 4.09 – 4.05 (m, 2H), 4.02 (t,  $J = 6.5$  Hz, 2H), 1.60 – 1.52 (m, 2H), 1.37 – 1.33 (m, 2H), 1.32 – 1.28 (m, 2H), 0.92 (t,  $J = 7.5$  Hz, 3H), 0.88 (d,  $J = 7.5$  Hz, 3H).

**$^{13}\text{C}$  NMR** (125 MHz,  $\text{CDCl}_3$ )

$\delta$  165.41, 165.15, 161.37, 146.10, 145.13, 144.37, 143.35, 143.17, 141.35, 138.48, 135.13, 134.73, 133.46, 129.06, 128.74, 128.17, 127.34, 124.93, 122.81, 63.55, 63.45, 40.40, 29.61, 29.53, 18.09, 18.07, 12.67, 12.66.

**HRMS (ESI)** for  $\text{C}_{28}\text{H}_{33}\text{N}_3\text{O}_5\text{Na}$   $[\text{M} + \text{Na}]^+$ : 514.2312, found: 514.2308.

**FTIR** (KBr,  $\text{cm}^{-1}$ )

3481.31, 3456.07, 3428.04, 3422.43, 3405.61, 2357.01, 2331.78,  
1644.86, 1633.64, 1628.04, 1619.63, 1608.41, 1543.93, 1507.48,  
1403.74, 1395.33, 1381.31.

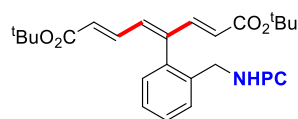

**Di-tert-butyl (2E,4Z,6E)-4-(2-((pyrazine-2-carboxamido)methyl)phenyl)octa-2,4,6-trienedioate (5b)**

Following the general procedure 1, **5b** was obtained as a colorless oil (73.7 mg, 77% yield).

**<sup>1</sup>H NMR** (500 MHz, CDCl<sub>3</sub>)

δ 9.36 (d, *J* = 1.5 Hz, 1H), 8.69 (d, *J* = 2.5 Hz, 1H), 8.43 – 8.42 (m, 1H), 7.87 (s, 1H), 7.51 (d, *J* = 7.0 Hz, 1H), 7.47 (d, *J* = 15.5 Hz, 1H), 7.42 – 7.35 (m, 2H), 7.06 (dd, *J* = 7.5, 1.5 Hz, 1H), 6.86 (dd, *J* = 15.0, 12.0 Hz, 1H), 6.73 (d, *J* = 11.5 Hz, 1H), 5.98 (d, *J* = 15.0 Hz, 1H), 5.36 (d, *J* = 15.0 Hz, 1H), 4.52 – 4.39 (m, 2H), 1.42 (s, 9H), 1.39 (s, 9H).

**<sup>13</sup>C NMR** (125 MHz, CDCl<sub>3</sub>)

δ 164.68, 164.54, 146.11, 144.38, 144.05, 143.33, 141.44, 137.72, 134.80, 134.68, 133.69, 129.13, 128.56, 128.04, 127.26, 126.61, 124.44, 98.96, 79.75, 79.69, 40.38, 28.68, 27.05, 27.02.

**HRMS (ESI)** for C<sub>28</sub>H<sub>33</sub>N<sub>3</sub>O<sub>5</sub>Na [M<sup>+</sup>Na]<sup>+</sup>: 514.2312, found: 514.2306.

**FTIR** (KBr, cm<sup>-1</sup>)

3512.15, 3472.90, 3458.88, 3444.86, 3414.02, 3405.61, 2354.21, 2328.97, 1675.7, 1658.88, 1653.27, 1644.86, 1633.64, 1619.63, 1616.82, 1557.94, 1541.12, 1510.28, 1459.81, 1403.74, 1392.52, 1386.92.

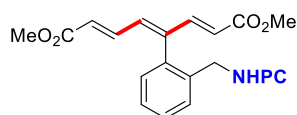

**Dimethyl (2E,4Z,6E)-4-(2-((pyrazine-2-carboxamido)methyl)phenyl)octa-2,4,6-trienedioate (5c)**

Following the general procedure 1, **5c** was obtained as a yellow oil (61.1 mg, 54% yield, m.p. = 135-136 °C).

**<sup>1</sup>H NMR** (500 MHz, CDCl<sub>3</sub>)



$\delta$  9.35 (d,  $J$  = 1.5 Hz, 1H), 8.70 (d,  $J$  = 2.5 Hz, 1H), 8.40 – 8.39 (m, 1H), 7.86 (s, 1H), 7.58 (d,  $J$  = 15.5 Hz, 1H), 7.53 (d,  $J$  = 7.5 Hz, 1H), 7.45 – 7.37 (m, 2H), 7.06 (d,  $J$  = 8.5 Hz, 1H), 6.91 (dd,  $J$  = 15.0, 11.5 Hz, 1H), 6.78 (d,  $J$  = 11.5 Hz, 1H), 6.04 (d,  $J$  = 15.0 Hz, 1H), 5.45 (d,  $J$  = 15.5 Hz, 1H), 4.50 – 4.38 (m, 2H), 3.67 (s, 3H), 3.62 (s, 3H).

**$^{13}\text{C}$  NMR** (125 MHz,  $\text{CDCl}_3$ )

$\delta$  165.69, 165.43, 161.37, 146.12, 145.39, 144.41, 143.38, 143.15, 141.34, 138.59, 135.23, 134.73, 133.35, 129.04, 128.78, 128.24, 127.38, 124.60, 122.43, 50.65, 40.40, 28.68.

**HRMS (ESI)** for  $\text{C}_{22}\text{H}_{21}\text{N}_3\text{O}_5\text{Na}$   $[\text{M}+\text{Na}]^+$ : 430.1373, found: 430.1363.

**FTIR** (KBr,  $\text{cm}^{-1}$ )

3514.95, 3472.90, 3456.07, 3444.86, 3425.23, 3414.02, 2359.81, 2334.58, 1661.638, 1653.27, 1636.45, 1625.23, 1538.32, 1510.28, 1406.54, 1395.33.

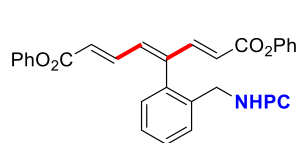

**Diphenyl (2E,4Z,6E)-4-(2-((pyrazine-2-carboxamido)methyl)phenyl)octa-2,4,6-trienedioate (**5d**)**

Following the general procedure 1, **5d** was obtained as a yellow oil (53.0 mg, 66% yield).

**$^1\text{H}$  NMR** (500 MHz,  $\text{CDCl}_3$ )

$\delta$  9.39 (d,  $J$  = 1.5 Hz, 1H), 8.65 (d,  $J$  = 2.5 Hz, 1H), 8.35 (dd,  $J$  = 2.5, 1.5 Hz, 1H), 7.93 (t,  $J$  = 5.5 Hz, 1H), 7.79 (d,  $J$  = 15.5 Hz, 1H), 7.57 (d,  $J$  = 8.5 Hz, 1H), 7.48 – 7.41 (m, 2H), 7.39 – 7.34 (m, 4H), 7.25 – 7.20 (m, 2H), 7.16 – 7.15 (m, 1H), 7.12 (dd,  $J$  = 13.0, 9.0 Hz, 1H), 7.04 – 7.00 (m, 4H), 6.93 (d,  $J$  = 11.5 Hz, 1H), 6.28 (d,  $J$  = 15.0 Hz, 1H), 5.69 (d,  $J$  = 15.5 Hz, 1H), 4.58 – 4.48 (m, 2H).

**$^{13}\text{C}$  NMR** (125 MHz,  $\text{CDCl}_3$ )

$\delta$  163.62, 163.33, 161.42, 149.46, 149.44, 146.80, 146.28, 145.05, 143.36, 143.08, 141.50, 140.03, 135.70, 134.77, 133.09, 129.08, 128.89, 128.50, 128.44, 128.34, 127.52, 124.89, 124.84, 124.46,

122.37, 120.31, 40.44, 28.68.

**HRMS (ESI)** for C<sub>32</sub>H<sub>26</sub>N<sub>3</sub>O<sub>5</sub> [M+H]<sup>+</sup>: 532.1867, found: 532.1873.

**FTIR** (KBr, cm<sup>-1</sup>)

3475.70, 3447.66, 3422.43, 2357.01, 1656.07, 1650.47, 1633.64,  
1619.63, 1400.93.

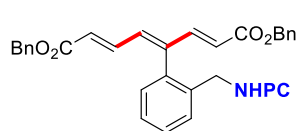

**Dibenzyl (2E,4Z,6E)-4-(2-((pyrazine-2-carboxamido)methyl)phenyl)octa-2,4,6-trienedioate (5e)**

Following the general procedure 1, **5e** was obtained as a yellow oil (46.1 mg, 55% yield).

**<sup>1</sup>H NMR** (500 MHz, CDCl<sub>3</sub>)

δ 9.31 (d, *J* = 1.5 Hz, 1H), 8.54 (d, *J* = 2.5 Hz, 1H), 8.14 (dd, *J* = 2.5, 1.5 Hz, 1H), 7.82 (t, *J* = 5.5 Hz, 1H), 7.61 (d, *J* = 15.5 Hz, 1H), 7.51 (d, *J* = 7.5 Hz, 1H), 7.43 – 7.40 (m, 1H), 7.39 – 7.31 (m, 9H), 7.30 – 7.27 (m, 2H), 7.05 (dd, *J* = 7.5, 1.0 Hz, 1H), 6.97 (dd, *J* = 15.5, 11.5 Hz, 1H), 6.78 (d, *J* = 11.5 Hz, 1H), 6.08 (d, *J* = 15.0 Hz, 1H), 5.50 (d, *J* = 15.5 Hz, 1H), 5.11 – 5.04 (m, 4H), 4.48 – 4.38 (m, 2H).

**<sup>13</sup>C NMR** (125 MHz, CDCl<sub>3</sub>)

δ 165.07, 164.84, 161.32, 146.09, 145.64, 144.61, 143.23, 143.04, 141.31, 139.05, 135.25, 134.72, 134.71, 134.58, 133.36, 129.06, 128.87, 128.25, 127.59, 127.53, 127.43, 127.41, 127.39, 127.26, 127.14, 124.55, 122.55, 65.52, 65.28, 40.42.

**HRMS (ESI)** for C<sub>34</sub>H<sub>29</sub>N<sub>3</sub>O<sub>5</sub>Na [M+Na]<sup>+</sup>: 582.1999, found: 582.1997.

**FTIR** (KBr, cm<sup>-1</sup>)

3509.35, 3475.70, 3456.07, 3442.06, 3422.43, 3408.41, 2354.21, 2320.56, 1684.11, 1672.90, 1658.88, 1656.07, 1633.64, 1622.43, 1611.21, 1557.94, 1538.32, 1504.67, 1417.76, 1403.74, 1392.52, 1384.11.

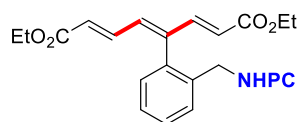

**Diethyl (2E,4Z,6E)-4-(2-((pyrazine-2-carboxamido)methyl)phenyl)octa-2,4,6-trienedioate**

**yl)phenyl)octa-2,4,6-trienedioate (5f)**

Following the general procedure 1, **5f** was obtained as a yellow oil (46.2 mg, 71% yield).

**<sup>1</sup>H NMR** (500 MHz, CDCl<sub>3</sub>)

δ 9.35 (d, *J* = 1.5 Hz, 1H), 8.69 (d, *J* = 2.5 Hz, 1H), 8.40 (dd, *J* = 2.5, 1.5 Hz, 1H), 7.86 (t, *J* = 5.5 Hz, 1H), 7.57 (d, *J* = 15.5 Hz, 1H), 7.52 (dd, *J* = 7.5, 1.0 Hz, 1H), 7.44 – 7.36 (m, 2H), 7.06 (dd, *J* = 7.5, 1.5 Hz, 1H), 6.92 (dd, *J* = 15.0, 11.5 Hz, 1H), 6.78 (d, *J* = 11.5 Hz, 1H), 6.04 (d, *J* = 15.5 Hz, 1H), 5.44 (d, *J* = 15.5 Hz, 1H), 4.50 – 4.39 (m, 2H), 4.15–4.10 (m, 2H), 4.08 (q, *J* = 7.5 Hz, 2H), 1.23 (t, *J* = 7.5 Hz, 3H), 1.20 (t, *J* = 7.5 Hz, 3H).

**<sup>13</sup>C NMR** (125 MHz, CDCl<sub>3</sub>)

δ 165.30, 165.07, 161.37, 146.10, 145.21, 144.33, 143.36, 143.18, 141.34, 138.42, 135.18, 134.72, 133.44, 129.07, 128.74, 128.19, 127.35, 125.01, 122.79, 59.54, 40.40, 13.17.

**HRMS (ESI)** for C<sub>24</sub>H<sub>25</sub>N<sub>3</sub>O<sub>5</sub>Na [M+Na]<sup>+</sup>: 458.1686, found: 458.1684.

**FTIR** (KBr, cm<sup>-1</sup>)

3565.42, 3512.15, 3456.07, 3444.86, 2354.21, 2326.17, 1684.11, 1670.09, 1650.47, 1636.45, 1622.43, 1557.94, 1538.32, 1507.48, 1473.83, 1454.21, 1395.33, 1386.92.

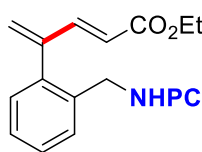

**Ethyl (E)-4-(2-((pyrazine-2-carboxamido)methyl)phenyl)penta-2,4-dienoate (5f')**

Following the general procedure 1, **5f'** was obtained as a white oil (10.8 mg, 21% yield).

**<sup>1</sup>H NMR** (500 MHz, CDCl<sub>3</sub>)

δ 9.40 (d, *J* = 1.5 Hz, 1H), 8.72 (d, *J* = 2.5 Hz, 1H), 8.46 (dd, *J* = 2.5, 1.5 Hz, 1H), 7.94 (s, 1H), 7.57 (d, *J* = 15.5 Hz, 1H), 7.47 (dd, *J* = 7.5, 1.0 Hz, 1H), 7.37 – 7.31 (m, 2H), 7.12 (dd, *J* = 7.5, 1.5 Hz, 1H), 5.85 (d, *J* = 1.5 Hz, 1H), 5.51 (d, *J* = 1.5 Hz, 1H), 5.41 (d, *J* = 15.5 Hz, 1H), 4.56 (d, *J* = 6.0 Hz, 2H), 4.13 (q, *J* = 7.0 Hz, 2H),

1.23 (d,  $J = 7.0$  Hz, 3H).

**$^{13}\text{C}$  NMR** (125 MHz,  $\text{CDCl}_3$ )

$\delta$  165.61, 161.55, 146.20, 145.28, 144.26, 143.43, 143.30, 141.44, 136.83, 134.31, 128.84, 128.06, 127.49, 126.87, 125.35, 121.23, 59.48, 40.27, 13.18.

**HRMS (ESI)** for  $\text{C}_{19}\text{H}_{19}\text{N}_3\text{O}_3\text{Na}$   $[\text{M}+\text{Na}]^+$ : 360.1319, found: 360.1308.

**FTIR** (KBr,  $\text{cm}^{-1}$ )

3509.35, 3472.90, 3456.07, 3442.06, 3422.43, 3405.61, 2354.21, 2340.19, 1658.88, 1653.27, 1633.64, 1625.23, 1616.82, 1560.75, 1541.12, 1510.28, 1406.54, 1392.52, 1384.11.

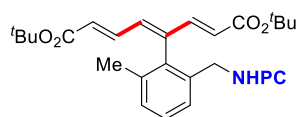

**Di-tert-butyl (2*E*,4*Z*,6*E*)-4-(2-methyl-6-((pyrazine-2-carboxamido)methyl)phenyl)octa-2,4,6-trienedioate (5g)**

Following the general procedure 1, **5g** was obtained as a yellow solid (45.7 mg, 60% yield, m.p. = 149-150 °C).

**$^1\text{H}$  NMR** (500 MHz,  $\text{CDCl}_3$ )

$\delta$  9.36 (d,  $J = 1.5$  Hz, 1H), 8.68 (d,  $J = 2.5$  Hz, 1H), 8.42 (dd,  $J = 2.5, 1.5$  Hz, 1H), 7.83 (t,  $J = 5.5$  Hz, 1H), 7.47 (d,  $J = 15.5$  Hz, 1H), 7.33 – 7.28 (m, 2H), 7.23 (d,  $J = 7.0$  Hz, 1H), 6.80 – 6.74 (m, 2H), 6.01 – 5.94 (m, 1H), 5.33 (d,  $J = 15.5$  Hz, 1H), 4.45 – 4.35 (m, 2H), 2.08 (s, 3H), 1.42 (s, 9H), 1.39 (s, 9H).

**$^{13}\text{C}$  NMR** (125 MHz,  $\text{CDCl}_3$ )

$\delta$  164.74, 164.52, 161.27, 146.04, 143.58, 143.30, 143.26, 143.23, 141.44, 137.41, 135.74, 135.02, 134.45, 133.09, 128.96, 127.79, 126.86, 125.99, 123.46, 79.76, 79.68, 40.67, 27.05, 27.02, 18.58.

**HRMS (ESI)** for  $\text{C}_{29}\text{H}_{36}\text{N}_3\text{O}_5$   $[\text{M}+\text{H}]^+$ : 506.2649, found: 506.2662.

**FTIR** (KBr,  $\text{cm}^{-1}$ )

3481.31, 3456.07, 3444.86, 2357.01, 1653.27, 1650.47, 1633.64, 1622.43, 1417.76, 1403.74, 1395.33.

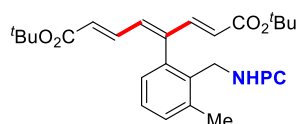

**Di-tert-butyl (2*E*,4*Z*,6*E*)-4-(3-methyl-2-((pyrazine-2-carboxamido)methyl)phenyl)octa-2,4,6-trienedioate**

**oxamido)methyl)phenyl)octa-2,4,6-trienedioate (5h)**

Following the general procedure 1, **5h** was obtained as a yellow solid (46.8 mg, 51% yield, m.p. = 61-62 °C).

**<sup>1</sup>H NMR** (500 MHz, CDCl<sub>3</sub>)

δ 9.34 (d, *J* = 1.5 Hz, 1H), 8.66 (d, *J* = 2.5 Hz, 1H), 8.38 (dd, *J* = 2.5, 1.5 Hz, 1H), 7.59 (t, *J* = 4.5 Hz, 1H), 7.48 (d, *J* = 15.5 Hz, 1H), 7.29 (d, *J* = 7.5 Hz, 1H), 7.26 (d, *J* = 5.5 Hz, 1H), 6.91 – 6.86 (m, 2H), 6.72 (d, *J* = 12.0 Hz, 1H), 5.94 (s, 1H), 5.36 (d, *J* = 15.5 Hz, 1H), 4.51 – 4.41 (m, 2H), 2.48 (s, 3H), 1.42 (s, 9H), 1.39 (s, 9H).

**<sup>13</sup>C NMR** (125 MHz, CDCl<sub>3</sub>)

δ 164.64, 164.58, 161.15, 145.99, 144.83, 144.80, 143.20, 141.41, 137.84, 137.37, 135.03, 134.78, 132.33, 130.16, 130.14, 127.43, 126.83, 126.37, 124.53, 79.71, 79.64, 37.58, 27.05, 27.04, 18.74.

**HRMS (ESI)** for C<sub>29</sub>H<sub>35</sub>N<sub>3</sub>O<sub>5</sub>Na [M+Na]<sup>+</sup>: 528.2469, found: 528.2453.

**FTIR** (KBr, cm<sup>-1</sup>)

3565.42, 3414.02, 2317.76, 1748.60, 1731.78, 1712.15, 1656.07, 1636.45, 1622.43.

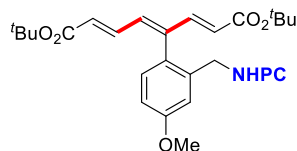

**Di-tert-butyl (2E,4Z,6E)-4-(4-methoxy-2-((pyrazine-2-carboxamido)methyl)phenyl)octa-2,4,6-trienedioate (5i)**

Following the general procedure 1, **5i** was obtained as a white oil (47.1 mg, 60% yield).

**<sup>1</sup>H NMR** (500 MHz, CDCl<sub>3</sub>)

δ 9.36 (d, *J* = 1.5 Hz, 1H), 8.69 (d, *J* = 2.5 Hz, 1H), 8.43 (dd, *J* = 2.5, 1.5 Hz, 1H), 7.87 (t, *J* = 5.5 Hz, 1H), 7.46 (d, *J* = 15.5 Hz, 1H), 7.03 (d, *J* = 2.5 Hz, 1H), 6.97 (d, *J* = 8.0 Hz, 1H), 6.93 – 6.87 (m, 2H), 6.72 (d, *J* = 11.5 Hz, 1H), 5.98 (d, *J* = 15.0 Hz, 1H), 5.40 (d, *J* = 15.5 Hz, 1H), 4.47 – 4.35 (m, 2H), 3.84 (s, 3H), 1.43 (s, 9H), 1.40 (s, 9H).

**<sup>13</sup>C NMR** (125 MHz, CDCl<sub>3</sub>)

δ 164.76, 164.65, 161.44, 158.90, 146.12, 144.80, 144.02, 143.33,

143.22, 141.45, 137.93, 136.15, 135.12, 130.29, 126.35, 125.60,  
124.36, 114.04, 112.57, 79.69, 79.67, 54.36, 40.51, 28.68, 27.04.

**HRMS (ESI)** for C<sub>29</sub>H<sub>35</sub>N<sub>3</sub>O<sub>6</sub>K [M+K]<sup>+</sup>: 560.2157, found: 560.2164.

**FTIR** (KBr, cm<sup>-1</sup>)

3568.22, 3512.15, 3475.70, 3456.07, 3447.66, 2351.40, 2326.17,  
1684.11, 1670.09, 1653.27, 1636.45, 1622.43, 1538.32, 1504.67,  
1406.54, 1400.93.

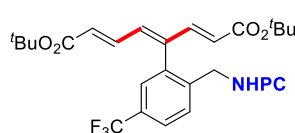

**Di-tert-butyl (2E,4Z,6E)-4-(2-((pyrazine-2-carboxamido)methyl)-5-(trifluoromethyl)phenyl)octa-2,4,6-trienedioate (5j)** Following the general procedure 1, **5j** was obtained

as a white solid (61.6 mg, 73% yield, m.p. = 89-90 °C).

**<sup>1</sup>H NMR** (500 MHz, CDCl<sub>3</sub>)

δ 9.30 (d, *J* = 1.5 Hz, 1H), 8.65 (d, *J* = 2.5 Hz, 1H), 8.38 (dd, *J* = 2.5, 1.5 Hz, 1H), 7.88 (t, *J* = 6.0 Hz, 1H), 7.60 (d, *J* = 1.0 Hz, 2H), 7.42 (d, *J* = 15.5 Hz, 1H), 7.26 (s, 1H), 6.74 – 6.66 (m, 2H), 5.96 (d, *J* = 14.0 Hz, 1H), 5.24 – 5.21 (m, 1H), 4.49 – 4.37 (m, 2H), 1.37 (s, 9H), 1.32 (s, 9H).

**<sup>13</sup>C NMR** (125 MHz, CDCl<sub>3</sub>)

δ 164.39, 164.26, 161.67, 146.36, 143.66, 143.38, 142.92, 142.24, 141.49, 136.84 (d, *J*<sub>CF</sub> = 1.4 Hz), 136.79, 135.37, 134.36, 199.61 (q, *J*<sub>CF</sub> = 32.8 Hz), 128.99, 127.70, 125.78 (q, *J*<sub>CF</sub> = 3.9 Hz), 125.48 (q, *J*<sub>CF</sub> = 254.7 Hz), 125.00 (q, *J*<sub>CF</sub> = 3.5 Hz), 124.58, 80.05, 79.96, 39.91, 27.04, 26.98.

**<sup>19</sup>F NMR** (471 MHz, CDCl<sub>3</sub>)

δ -62.51.

**HRMS (ESI)** for C<sub>29</sub>H<sub>32</sub>N<sub>3</sub>O<sub>5</sub>F<sub>3</sub>K [M+K]<sup>+</sup>: 598.1926, found: 598.1927.

**FTIR** (KBr, cm<sup>-1</sup>)

3453.23, 3439.25, 2362.62, 2326.17, 1667.29, 1656.07, 1633.64,  
1557.94, 1535.51, 1504.67.

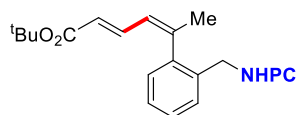

**Tert-butyl (2E,4Z)-5-(2-((pyrazine-2-carboxamido)methyl)phenyl)hexa-2,4-dienoate (7a)**

Following the general procedure 1, **7a** was obtained as a white solid (54.8 mg, 96% yield, m.p. = 62-63 °C).

**<sup>1</sup>H NMR** (500 MHz, CDCl<sub>3</sub>)

δ 9.39 (s, 1H), 8.71 (d, *J* = 2.5 Hz, 1H), 8.46 (dd, *J* = 2.5, 1.5 Hz, 1H), 7.98 (s, 1H), 7.45 – 7.41 (m, 1H), 7.33 – 7.30 (m, 2H), 7.07 (dd, *J* = 5.5, 3.5 Hz, 1H), 6.81 (dd, *J* = 15.5, 11.5 Hz, 1H), 6.32 (d, *J* = 12.0 Hz, 1H), 5.74 (d, *J* = 15.5 Hz, 1H), 4.65 (dd, *J* = 15.0, 6.0 Hz, 1H), 4.45 (dd, *J* = 14.5, 5.5 Hz, 1H), 2.17 (s, 3H), 1.39 (s, 9H).

**<sup>13</sup>C NMR** (125 MHz, CDCl<sub>3</sub>)

δ 165.38, 161.60, 146.16, 146.12, 143.36, 143.33, 141.49, 139.27, 139.21, 133.35, 128.05, 127.50, 127.15, 127.03, 125.90, 121.54, 79.04, 40.21, 27.08, 25.60.

**HRMS (ESI)** for C<sub>22</sub>H<sub>26</sub>N<sub>3</sub>O<sub>3</sub> [M+H]<sup>+</sup>: 380.1969, found: 380.1960.

**FTIR** (KBr, cm<sup>-1</sup>)

3481.31, 3458.88, 3444.86, 3425.23, 2357.01, 2258.88, 1661.68, 1656.07, 1647.66, 1633.64, 1628.04, 1622.43, 1412.15, 1403.74, 1395.33.

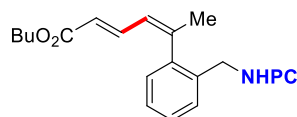

**Butyl (2E,4Z)-5-(2-((pyrazine-2-carboxamido)methyl)phenyl)hexa-2,4-dienoate (7b)**

Following the general procedure 1, **7b** was obtained as a white oil (49.5 mg, 87% yield).

**<sup>1</sup>H NMR** (500 MHz, CDCl<sub>3</sub>)

δ 9.39 (s, 1H), 8.71 (d, *J* = 2.5 Hz, 1H), 8.44 (dd, *J* = 2.5, 1.5 Hz, 1H), 7.97 (s, 1H), 7.47 – 7.44 (m, 1H), 7.35 – 7.31 (m, 2H), 7.10 – 7.06 (m, 1H), 6.87 (dd, *J* = 15.5, 11.5 Hz, 1H), 6.35 (d, *J* = 12.0 Hz, 1H), 5.80 (d, *J* = 15.5 Hz, 1H), 4.66 (dd, *J* = 15.0, 6.5 Hz, 1H), 4.43 (dd, *J* = 15.0, 5.5 Hz, 1H), 3.99 (t, *J* = 6.5 Hz, 2H), 2.19 (s, 3H), 1.56 – 1.50 (m, 2H), 1.33 – 1.27 (m, 2H), 0.88 (t, *J* = 7.5 Hz, 3H).

**<sup>13</sup>C NMR** (125 MHz, CDCl<sub>3</sub>)

δ 165.98, 161.58, 146.82, 146.14, 143.35, 143.31, 141.45, 140.20, 139.15, 133.38, 128.21, 127.44, 127.22, 127.07, 125.93, 119.69, 63.04, 40.23, 29.60, 25.64, 18.09, 12.67.

**HRMS (ESI)** for C<sub>22</sub>H<sub>26</sub>N<sub>3</sub>O<sub>3</sub> [M<sup>+</sup>H]<sup>+</sup>: 380.1969, found: 380.1961.

**FTIR** (KBr, cm<sup>-1</sup>)

3484.11, 3475.70, 3453.27, 3442.06, 3422.43, 2357.01, 2328.97, 1664.49, 1656.07, 1647.66, 1633.64, 1628.04, 1622.43, 1614.02, 1409.35, 1400.93, 1389.72.

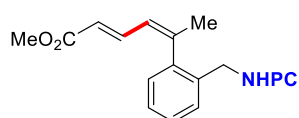

**Methyl (2*E*,4*Z*)-5-(2-((pyrazine-2-carboxamido)methyl)phenyl)hexa-2,4-dienoate (7c)**

Following the general procedure 1, **7c** was obtained as a light yellow oil (45.4 mg, 90% yield).

**<sup>1</sup>H NMR** (500 MHz, CDCl<sub>3</sub>)

δ 9.39 (d, *J* = 1.5 Hz, 1H), 8.71 (d, *J* = 2.5 Hz, 1H), 8.44 (dd, *J* = 2.5, 1.5 Hz, 1H), 7.97 (s, 1H), 7.48 – 7.45 (m, 1H), 7.36 – 7.32 (m, 2H), 7.09 – 7.07 (m, 1H), 6.86 (dd, *J* = 15.5, 11.5 Hz, 1H), 6.36 (d, *J* = 12.0 Hz, 1H), 5.80 (d, *J* = 15.5 Hz, 1H), 4.65 (dd, *J* = 15.0, 6.5 Hz, 1H), 4.44 (dd, *J* = 14.5, 5.5 Hz, 1H), 3.59 (s, 3H), 2.19 (s, 3H).

**<sup>13</sup>C NMR** (125 MHz, CDCl<sub>3</sub>)

δ 167.27, 162.61, 148.00, 147.18, 144.39, 144.32, 142.46, 141.36, 140.13, 134.40, 129.30, 128.44, 128.27, 128.12, 126.98, 120.34, 51.34, 41.26, 26.73.

**HRMS (ESI)** for C<sub>19</sub>H<sub>20</sub>N<sub>3</sub>O<sub>3</sub> [M+H]<sup>+</sup>: 338.1499, found: 338.1504.

**FTIR** (KBr, cm<sup>-1</sup>)

3475.70, 3456.07, 3439.25, 3416.82, 2359.81, 2334.58, 1658.88, 1656.07, 1647.66, 1633.64, 1622.43, 1611.21, 1420.56, 1403.74, 1395.33.



**Phenyl (2*E*,4*Z*)-5-(2-((pyrazine-2-carboxamido)methyl)phenyl)hexa-2,4-dienoate**

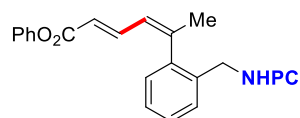

**(7d)**

Following the general procedure 1, **7d** was obtained as a brown solid (50.5 mg, 84% yield, m.p. = 103-104 °C).

**<sup>1</sup>H NMR** (500 MHz, CDCl<sub>3</sub>)

δ 9.40 (d, *J* = 2.0 Hz, 1H), 8.67 (d, *J* = 2.5 Hz, 1H), 8.40 – 8.39 (m, 1H), 8.00 (s, 1H), 7.45 (dt, *J* = 7.5, 4.0 Hz, 1H), 7.35 – 7.31 (m, 4H), 7.18 (t, *J* = 7.5 Hz, 1H), 7.12 – 7.09 (m, 1H), 7.05 (dd, *J* = 15.5, 11.5 Hz, 1H), 6.98 (d, *J* = 7.5 Hz, 2H), 6.44 (d, *J* = 11.5 Hz, 1H), 5.99 (d, *J* = 15.5 Hz, 1H), 4.68 (dd, *J* = 15.0, 6.5 Hz, 1H), 4.46 (dd, *J* = 15.0, 5.5 Hz, 1H), 2.22 (s, 3H).

**<sup>13</sup>C NMR** (125 MHz, CDCl<sub>3</sub>)

δ 165.20, 162.65, 150.68, 149.28, 147.27, 144.38, 144.27, 143.08, 142.56, 139.97, 134.39, 129.28, 129.26, 128.42, 128.41, 128.15, 126.92, 125.58, 121.47, 119.77, 41.25, 26.85.

**HRMS (ESI)** for C<sub>24</sub>H<sub>22</sub>N<sub>3</sub>O<sub>3</sub> [M+H]<sup>+</sup>: 400.1656, found: 400.1649.

**FTIR** (KBr, cm<sup>-1</sup>)

3478.50, 3458.88, 3422.43, 3402.80, 3388.79, 2359.81, 2334.58, 1647.66, 1644.86, 1633.64, 1614.02, 1608.41, 1417.76, 1406.54, 1392.52.

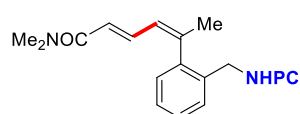

**N-(2-((2*Z*,4*E*)-6-(dimethylamino)-6-oxohexa-2,4-dien-2-yl)benzyl)pyrazine-2-carboxamide (7e)**

Following the general procedure 1, **7e** was obtained as a brown oil (46.7 mg, 89% yield).

**<sup>1</sup>H NMR** (500 MHz, CDCl<sub>3</sub>)

δ 9.38 (d, *J* = 1.5 Hz, 1H), 8.70 (d, *J* = 2.5 Hz, 1H), 8.47 (dd, *J* = 2.5, 1.5 Hz, 1H), 8.05 (s, 1H), 7.42 – 7.38 (m, 1H), 7.32 – 7.29 (m, 2H), 7.10 – 7.06 (m, 1H), 6.87 (dd, *J* = 14.5, 11.5 Hz, 1H), 6.37 – 6.34 (m, 1H), 6.23 (d, *J* = 15.0 Hz, 1H), 4.64 (dd, *J* = 14.5, 6.0 Hz, 1H), 4.46 (dd, *J* = 14.5, 5.5 Hz, 1H), 2.99 (s, 3H), 2.90 (s, 3H), 2.16

(s, 3H).

**<sup>13</sup>C NMR** (125 MHz, CDCl<sub>3</sub>)

δ 166.64, 162.63, 147.02, 145.85, 144.50, 144.28, 142.59, 140.38, 139.15, 134.33, 128.88, 128.57, 128.08, 127.30, 119.85, 41.25, 37.22, 35.64, 26.65.

**HRMS (ESI)** for C<sub>20</sub>H<sub>23</sub>N<sub>4</sub>O<sub>2</sub> [M+H]<sup>+</sup>: 351.1816, found: 351.1814.

**FTIR** (KBr, cm<sup>-1</sup>)

3568.22, 3523.36, 3512.15, 3475.70, 3456.07, 31416.82, 3385.98, 2362.62, 2326.17, 1664.49, 1656.07, 1644.86, 1633.64, 1625.23, 1614.02, 1417.76, 1403.74, 1392.52, 1384.11.

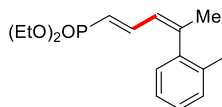

**Diethyl ((1*E*,3*Z*)-4-(2-((pyrazine-2-carboxamido)methyl)phenyl)penta-1,3-dien-1-yl)phosphonate (7f)**

Following the general procedure 1, **7f** was obtained as a colorless oil (61.9 mg, 99% yield).

**<sup>1</sup>H NMR** (500 MHz, CDCl<sub>3</sub>)

δ 9.40 (d, *J* = 1.5 Hz, 1H), 8.74 (d, *J* = 2.5 Hz, 1H), 8.53 (dd, *J* = 2.5, 1.5 Hz, 1H), 8.05 (s, 1H), 7.44 – 7.41 (m, 1H), 7.34 – 7.29 (m, 2H), 7.09 – 7.05 (m, 1H), 6.72 – 6.62 (m, 1H), 6.32 (d, *J* = 11.0 Hz, 1H), 5.65 (dd, *J* = 20.0, 16.5 Hz, 1H), 4.67 (dd, *J* = 15.0, 6.5 Hz, 1H), 4.44 (dd, *J* = 15.0, 5.5 Hz, 1H), 3.99 – 3.93 (m, 4H), 2.17 (s, 3H), 1.22 (t, *J* = 7.0 Hz, 6H).

**<sup>13</sup>C NMR** (125 MHz, CDCl<sub>3</sub>)

δ 161.75, 146.27, 145.93, 143.82, 143.76, 143.33, 143.28, 141.66, 138.83, 133.36, 127.80, 127.48, 127.25, 127.01, 126.84, 116.29, 114.77, 60.62, 40.08, 25.44, 15.20.

**HRMS (ESI)** for C<sub>21</sub>H<sub>27</sub>N<sub>3</sub>O<sub>4</sub>P [M+H]<sup>+</sup>: 416.1734, found: 416.1737.

**FTIR** (KBr, cm<sup>-1</sup>)

3472.90, 3453.27, 3442.06, 3422.43, 3385.98, 2357.01, 2337.38, 1654.49, 1656.07, 1647.66, 1636.45, 1619.63, 1614.02, 1417.76, 1400.93, 1384.11.

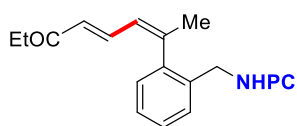

***N*-(2-((2*Z*,4*E*)-6-oxoocta-2,4-dien-2-yl)benzyl)pyrazine-2-carboxamide (7g)**

Following the general procedure 1, **7g** was obtained as a yellow oil (38.1 mg, 76% yield).

**<sup>1</sup>H NMR** (500 MHz, CDCl<sub>3</sub>)

δ 9.38 (d, *J* = 1.5 Hz, 1H), 8.71 (d, *J* = 2.5 Hz, 1H), 8.43 (dd, *J* = 2.5, 1.5 Hz, 1H), 7.97 (s, 1H), 7.48 – 7.46 (m, 1H), 7.37 – 7.33 (m, 2H), 7.10 – 7.08 (m, 1H), 6.75 (dd, *J* = 15.5, 11.5 Hz, 1H), 6.36 (d, *J* = 11.0 Hz, 1H), 6.09 (d, *J* = 15.5 Hz, 1H), 4.65 (dd, *J* = 14.5, 6.0 Hz, 1H), 4.45 (dd, *J* = 15.0, 5.5 Hz, 1H), 2.34 (q, *J* = 7.5 Hz, 2H), 2.20 (s, 3H), 0.96 (t, *J* = 7.5 Hz, 3H).

**<sup>13</sup>C NMR** (125 MHz, CDCl<sub>3</sub>)

δ 201.01, 162.60, 148.62, 147.28, 144.37, 144.24, 142.51, 140.19, 138.79, 134.43, 129.28, 128.91, 128.40, 128.34, 128.12, 127.49, 41.22, 33.52, 26.81, 8.02.

**HRMS (ESI)** for C<sub>20</sub>H<sub>22</sub>N<sub>3</sub>O<sub>2</sub> [M+H]<sup>+</sup>: 336.1707, found: 336.1716.

**FTIR** (KBr, cm<sup>-1</sup>)

3509.35, 3489.72, 3472.90, 3453.27, 3416.82, 3385.98, 2359.81, 2328.97, 1667.29, 1656.07, 1647.66, 1639.25, 1622.43, 1614.02, 1403.74, 1400.93, 1392.52.

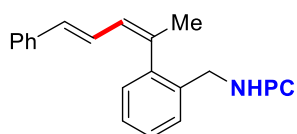

***N*-(2-((2*Z*,4*E*)-5-phenylpenta-2,4-dien-2-yl)benzyl)pyrazine-2-carboxamide (7h)**

Following the general procedure 1, **7h** was obtained as a yellow oil (44.7 mg, 84% yield).

**<sup>1</sup>H NMR** (500 MHz, CDCl<sub>3</sub>)

δ 9.31 (d, *J* = 1.5 Hz, 1H), 8.46 (d, *J* = 2.5 Hz, 1H), 7.97 (s, 1H), 7.90 (dd, *J* = 2.5, 1.5 Hz, 1H), 7.52 – 7.50 (m, 1H), 7.37 – 7.32 (m, 2H), 7.18 – 7.10 (m, 6H), 6.44 (d, *J* = 15.5 Hz, 1H), 6.39 (dd, *J* = 10.5, 1.5 Hz, 1H), 6.31 (dd, *J* = 15.5, 10.5 Hz, 1H), 4.70 (dd, *J* =

14.5, 6.5 Hz, 1H), 4.46 (dd,  $J = 14.5, 5.5$  Hz, 1H), 2.16 (s, 3H).

**$^{13}\text{C}$  NMR** (125 MHz,  $\text{CDCl}_3$ )

$\delta$  162.52, 146.85, 144.22, 144.11, 142.28, 141.60, 138.94, 137.24, 134.94, 131.71, 129.68, 129.05, 128.88, 128.36, 128.12, 127.74, 127.25, 126.25, 125.82, 41.48, 26.35.

**HRMS (ESI)** for  $\text{C}_{23}\text{H}_{22}\text{N}_3\text{O}$   $[\text{M}+\text{H}]^+$ : 356.1757, found: 356.1765.

**FTIR** (KBr,  $\text{cm}^{-1}$ )

3509.35, 3472.90, 3458.88, 3447.66, 3416.82, 3385.98, 2357.01, 2328.97, 2258.88, 1672.90, 1661.68, 1644.86, 1639.25, 1622.43, 1611.21, 1403.74, 1398.13.

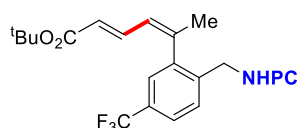

**Tert-butyl (2*E*,4*Z*)-5-(2-((pyrazine-2-carboxamido)methyl)-5-(trifluoromethyl)phenyl)hexa-2,4-dienoate (**7i**)**

Following the general procedure 1, **7i** was obtained as a yellow oil (55.6 mg, 83% yield).

**$^1\text{H}$  NMR** (500 MHz,  $\text{CDCl}_3$ )

$\delta$  9.40 (d,  $J = 1.0$  Hz, 1H), 8.74 (d,  $J = 2.5$  Hz, 1H), 8.49 (dd,  $J = 2.0, 1.5$  Hz, 1H), 8.09 (s, 1H), 7.57 (s, 2H), 7.35 (s, 1H), 6.73 (dd,  $J = 15.5, 11.5$  Hz, 1H), 6.39 (d,  $J = 12.0$  Hz, 1H), 5.81 (d,  $J = 15.0$  Hz, 1H), 4.72 (dd,  $J = 15.0, 6.5$  Hz, 1H), 4.46 (dd,  $J = 15.0, 5.5$  Hz, 1H), 2.20 (s, 3H), 1.39 (s, 9H).

**$^{13}\text{C}$  NMR** (125 MHz,  $\text{CDCl}_3$ )

$\delta$  165.12, 161.86, 146.41, 144.02, 143.39, 143.05, 141.56, 139.70, 138.26, 137.73 (d,  $J_{\text{CF}} = 0.9$  Hz), 129.28 (q,  $J_{\text{CF}} = 32.5$  Hz), 128.30, 126.64, 124.23 (q,  $J_{\text{CF}} = 3.8$  Hz), 123.98 (q,  $J_{\text{CF}} = 3.6$  Hz), 122.793 (q,  $J_{\text{CF}} = 270.8$  Hz), 122.71, 79.32, 39.76, 27.04, 25.34.

**HRMS (ESI)** for  $\text{C}_{23}\text{H}_{24}\text{N}_3\text{O}_3\text{F}_3\text{Na}$   $[\text{M}+\text{Na}]^+$ : 470.1662, found: 470.1671.

**FTIR** (KBr,  $\text{cm}^{-1}$ )

3564.69, 3454.39, 3444.63, 2351.40, 1686.92, 1653.27, 1633.64, 1560.75, 1543.93, 1504.67, 1409.35, 1400.93, 1171.03.

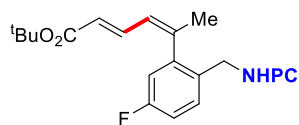

**Tert-butyl (2E,4Z)-5-(5-fluoro-2-((pyrazine-2-carboxamido)methyl)phenyl)hexa-2,4-dienoate (7j)**

Following the general procedure 1, **7j** was obtained as a yellow oil (52.1 mg, 87% yield).

**<sup>1</sup>H NMR** (500 MHz, CDCl<sub>3</sub>)

δ 9.39 (d, *J* = 1.5 Hz, 1H), 8.72 (d, *J* = 2.5 Hz, 1H), 8.47 (dd, *J* = 2.5, 1.5 Hz, 1H), 7.98 (s, 1H), 7.42 (dd, *J* = 8.5, 5.5 Hz, 1H), 7.03 – 6.99 (m, 1H), 6.81 – 6.76 (m, 2H), 6.34 – 6.32 (m, 1H), 5.77 (d, *J* = 15.5 Hz, 1H), 4.61 (dd, *J* = 15.0, 6.5 Hz, 1H), 4.40 (dd, *J* = 15.0, 5.5 Hz, 1H), 2.16 (s, 3H), 1.39 (s, 9H).

**<sup>13</sup>C NMR** (125 MHz, CDCl<sub>3</sub>)

δ 166.23, 162.66, 162.11 (d, *J*<sub>CF</sub> = 246.8 Hz), 147.26, 145.52, 144.36, 144.23, 142.53, 142.25 (d, *J*<sub>CF</sub> = 7.6 Hz), 139.65, 131.05 (d, *J*<sub>CF</sub> = 8.5 Hz), 130.41 (d, *J*<sub>CF</sub> = 3.3 Hz), 127.23, 123.25, 115.38 (d, *J*<sub>CF</sub> = 21.4 Hz), 115.02 (d, *J*<sub>CF</sub> = 21.0 Hz), 112.83 (d, *J*<sub>CF</sub> = 21.1 Hz), 80.23, 40.55, 28.08, 26.29.

**HRMS (ESI)** for C<sub>22</sub>H<sub>24</sub>N<sub>3</sub>O<sub>3</sub>FNa [M+Na]<sup>+</sup>: 420.1694, found: 420.1698.

**FTIR** (KBr, cm<sup>-1</sup>)

3475.70, 3453.27, 3442.06, 2357.01, 2331.78, 2258.88, 1667.29, 1661.68, 1656.07, 1647.66, 1633.64, 1619.63, 1611.21, 1420.56, 1403.74, 1395.33.

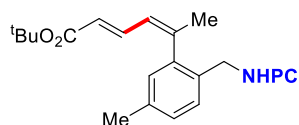

**Tert-butyl (2E,4Z)-5-(5-methyl-2-((pyrazine-2-carboxamido)methyl)phenyl)hexa-2,4-dienoate (7k)**

Following the general procedure 1, **7k** was obtained as a yellow oil (50.2 mg, 85% yield).

**<sup>1</sup>H NMR** (500 MHz, CDCl<sub>3</sub>)

δ 9.39 (d, *J* = 1.5 Hz, 1H), 8.70 (d, *J* = 2.5 Hz, 1H), 8.46 (dd, *J* = 2.0, 1.5 Hz, 1H), 7.93 (s, 1H), 7.31 (d, *J* = 7.5 Hz, 1H), 7.11 (d, *J* = 9.0 Hz, 1H), 6.88 (s, 1H), 6.83 (dd, *J* = 15.5, 11.5 Hz, 1H), 6.30 (d, *J* = 11.5 Hz, 1H), 5.74 (d, *J* = 15.5 Hz, 1H), 4.59 (dd, *J* = 14.5, 6.0 Hz, 1H), 4.41 (dd, *J* = 14.5, 5.5 Hz, 1H), 2.33 (s, 3H), 2.15 (s, 3H),

1.39 (s, 9H).

**<sup>13</sup>C NMR** (125 MHz, CDCl<sub>3</sub>)

δ 165.43, 161.51, 146.37, 146.09, 143.39, 143.32, 141.47, 139.44, 139.13, 136.78, 130.30, 128.15, 127.96, 127.86, 125.72, 121.36, 79.00, 40.00, 27.09, 25.67, 20.04.

**HRMS (ESI)** for C<sub>23</sub>H<sub>27</sub>N<sub>3</sub>O<sub>3</sub>Na [M+Na]<sup>+</sup>: 416.1945, found: 416.1941.

**FTIR** (KBr, cm<sup>-1</sup>)

3568.22, 3453.40, 3444.63, 2362.62, 2337.38, 1737.38, 1684.11, 1653.27, 1633.64, 1557.94, 1538.32, 1400.93, 1137.38.

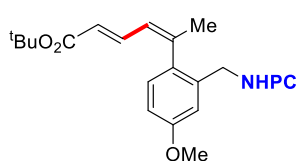

**Tert-butyl (2*E*,4*Z*)-5-(4-methoxy-2-((pyrazine-2-carboxamido)methyl)phenyl)hexa-2,4-dienoate (7I)**

Following the general procedure 1, **7I** was obtained as a yellow oil (61.0 mg, 99% yield).

**<sup>1</sup>H NMR** (500 MHz, CDCl<sub>3</sub>)

δ 9.43 (d, *J* = 1.5 Hz, 1H), 8.72 (d, *J* = 2.5 Hz, 1H), 8.47 – 8.46 (m, 1H), 7.99 (s, 1H), 6.99 (d, *J* = 8.5 Hz, 1H), 6.96 (d, *J* = 2.5 Hz, 1H), 6.88 – 6.82 (m, 2H), 6.32 (d, *J* = 11.5 Hz, 1H), 5.75 (d, *J* = 15.5 Hz, 1H), 4.62 (dd, *J* = 15.0, 6.5 Hz, 1H), 4.41 (dd, *J* = 15.0, 5.5 Hz, 1H), 3.81 (s, 3H), 2.15 (s, 3H), 1.40 (s, 9H).

**<sup>13</sup>C NMR** (125 MHz, CDCl<sub>3</sub>)

δ 165.48, 161.63, 158.29, 146.17, 146.13, 143.34, 143.32, 141.50, 139.52, 134.85, 131.33, 128.67, 126.17, 121.25, 113.53, 112.30, 79.01, 54.32, 40.33, 27.10, 25.78.

**HRMS (ESI)** for C<sub>23</sub>H<sub>27</sub>N<sub>3</sub>O<sub>4</sub>Na [M+Na]<sup>+</sup>: 432.1894, found: 432.1892.

**FTIR** (KBr, cm<sup>-1</sup>)

3507.88, 3473.10, 3444.05, 3423.18, 2357.01, 2261.687, 1656.07, 1644.85, 1636.45, 1628.04, 1614.02, 1460.75, 1541.12, 1507.48, 1398.13.

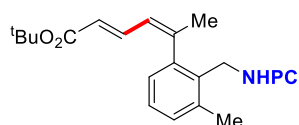

**Tert-butyl (2*E*,4*Z*)-5-(3-methyl-2-((pyrazine-2-carboxamido)methyl)phenyl)hexa-2,4-dienoate**

**ido)methyl)phenyl)hexa-2,4-dienoate (7m)**

Following the general procedure 1, **7m** was obtained as a yellow solid (41.1 mg, 70% yield, m.p. = 78-79 °C).

**<sup>1</sup>H NMR** (500 MHz, CDCl<sub>3</sub>)

δ 9.38 (d, *J* = 1.5 Hz, 1H), 8.68 (d, *J* = 2.5 Hz, 1H), 8.42 (dd, *J* = 2.5, 1.5 Hz, 1H), 7.68 (s, 1H), 7.24 (t, *J* = 7.5 Hz, 1H), 7.18 (d, *J* = 7.5 Hz, 1H), 6.93 (d, *J* = 7.0 Hz, 1H), 6.83 (dd, *J* = 15.5, 11.5 Hz, 1H), 6.32 (dd, *J* = 11.5, 0.5 Hz, 1H), 5.73 (d, *J* = 15.5 Hz, 1H), 4.66 (dd, *J* = 14.0, 5.5 Hz, 1H), 4.45 (dd, *J* = 14.0, 5.0 Hz, 1H), 2.44 (s, 3H), 2.16 (s, 3H), 1.38 (s, 9H).

**<sup>13</sup>C NMR** (125 MHz, CDCl<sub>3</sub>)

δ 166.39, 162.39, 147.89, 147.07, 144.31, 144.25, 142.50, 141.73, 140.36, 138.21, 131.97, 130.28, 128.34, 127.03, 126.26, 122.34, 79.99, 38.78, 28.12, 27.17, 19.65.

**HRMS (ESI)** for C<sub>23</sub>H<sub>27</sub>N<sub>3</sub>O<sub>3</sub>Na [M+Na]<sup>+</sup>: 416.1945, found: 416.1936.

**FTIR** (KBr, cm<sup>-1</sup>)

3475.70, 3456.07, 3444.86, 2354.21, 1653.27, 1650.47, 1633.64, 1622.43, 1406.54.

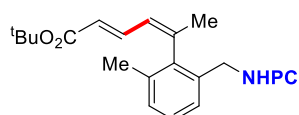

**Tert-butyl (2E,4Z)-5-(2-methyl-6-((pyrazine-2-carboxamido)methyl)phenyl)hexa-2,4-dienoate (7n)**

Following the general procedure 1, **7n** was obtained as a white oil (48.7 mg, 83% yield).

**<sup>1</sup>H NMR** (500 MHz, CDCl<sub>3</sub>)

δ 9.39 (d, *J* = 1.5 Hz, 1H), 8.70 (d, *J* = 2.0 Hz, 1H), 8.46 (dd, *J* = 2.0, 1.5 Hz, 1H), 7.94 (s, 1H), 7.26 (d, *J* = 7.5 Hz, 1H), 7.21 (t, *J* = 7.5 Hz, 1H), 7.17 (d, *J* = 7.0 Hz, 1H), 6.70 (dd, *J* = 15.0, 11.5 Hz, 1H), 6.38 (d, *J* = 12.0 Hz, 1H), 5.73 (d, *J* = 15.5 Hz, 1H), 4.61 (dd, *J* = 15.0, 6.5 Hz, 1H), 4.39 (dd, *J* = 15.0, 5.5 Hz, 1H), 2.17 (s, 3H), 2.13 (s, 3H), 1.38 (s, 9H).

**<sup>13</sup>C NMR** (125 MHz, CDCl<sub>3</sub>)

$\delta$  166.37, 162.51, 147.11, 146.41, 144.40, 144.34, 142.51, 139.95, 139.32, 135.26, 134.16, 129.77, 127.90, 127.39, 126.48, 122.71, 80.03, 41.44, 28.11, 25.19, 19.40.

**HRMS (ESI)** for  $C_{23}H_{27}N_3O_3Na$   $[M+Na]^+$ : 416.1945, found: 416.1943.

**FTIR** (KBr,  $cm^{-1}$ )

3475.70, 3453.27, 3442.06, 2357.01, 2331.78, 2258.88, 1667.29, 1661.68, 1656.07, 1647.66, 1633.64, 1619.63, 1611.21, 1420.56, 1403.74, 1395.33.

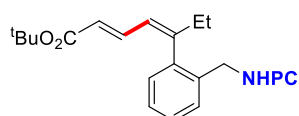

**Tert-butyl (2E,4Z)-5-(2-((pyrazine-2-carboxamido)methyl)phenyl)hepta-2,4-dienoate (7o)**

Following the general procedure 1, **7o** was obtained as a yellow oil (58.5 mg, 99% yield).

**<sup>1</sup>H NMR** (500 MHz,  $CDCl_3$ )

$\delta$  9.40 (d,  $J$  = 1.5 Hz, 1H), 8.71 (d,  $J$  = 2.5 Hz, 1H), 8.47 (dd,  $J$  = 2.5, 1.5 Hz, 1H), 7.98 (s, 1H), 7.44 – 7.42 (m, 1H), 7.34 – 7.28 (m, 2H), 7.06 – 7.04 (m, 1H), 6.84 (dd,  $J$  = 15.5, 11.5 Hz, 1H), 6.31 (d,  $J$  = 11.5 Hz, 1H), 5.77 (d,  $J$  = 15.5 Hz, 1H), 4.64 (dd,  $J$  = 15.0, 6.5 Hz, 1H), 4.44 (dd,  $J$  = 15.0, 5.5 Hz, 1H), 2.53 – 2.39 (m, 2H), 1.38 (s, 9H), 1.09 (t,  $J$  = 7.5 Hz, 3H).

**<sup>13</sup>C NMR** (125 MHz,  $CDCl_3$ )

$\delta$  165.38, 161.62, 151.77, 146.14, 143.33, 141.50, 139.37, 138.47, 133.64, 127.97, 127.85, 127.10, 126.74, 124.00, 121.73, 79.00, 40.13, 31.63, 27.07, 11.17.

**HRMS (ESI)** for  $C_{23}H_{27}N_3O_3Na$   $[M+Na]^+$ : 416.1945, found: 416.1953.

**FTIR** (KBr,  $cm^{-1}$ )

3509.35, 3472.90, 3456.07, 2354.21, 1670.09, 1658.88, 1644.86, 1633.64, 1619.63, 1398.13.

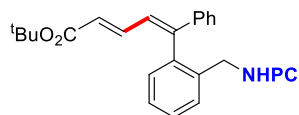

**Tert-butyl (2E,4Z)-5-phenyl-5-(2-((pyrazine-2-carboxamido)methyl)phenyl)penta-2,4-dienoate (7p)**



Following the general procedure 1, **7p** was obtained as a yellow oil (43.5 mg, 66% yield).

**<sup>1</sup>H NMR** (500 MHz, CDCl<sub>3</sub>)

δ 9.29 (d, *J* = 1.5 Hz, 1H), 8.65 (d, *J* = 2.5 Hz, 1H), 8.34 (dd, *J* = 2.5, 1.5 Hz, 1H), 7.67 (s, 1H), 7.51 – 7.50 (m, 1H), 7.43 – 7.38 (m, 2H), 7.30 – 7.28 (m, 2H), 7.26 – 7.18 (m, 4H), 7.03 – 6.96 (m, 2H), 6.01 – 5.94 (m, 1H), 4.44 – 4.33 (m, 2H), 1.41 (s, 9H).

**<sup>13</sup>C NMR** (125 MHz, CDCl<sub>3</sub>)

δ 165.16, 161.32, 146.94, 145.92, 143.25, 143.21, 141.24, 139.40, 138.65, 136.64, 135.07, 129.87, 128.68, 127.79, 127.65, 127.02, 125.80, 125.05, 123.82, 79.26, 40.49, 27.08.

**HRMS (ESI)** for C<sub>27</sub>H<sub>27</sub>N<sub>3</sub>O<sub>3</sub>Na [M+Na]<sup>+</sup>: 464.1945, found: 464.1948.

**FTIR** (KBr, cm<sup>-1</sup>)

3565.42, 3509.35, 3447.66, 2354.21, 1695.33, 1681.31, 1653.27, 1557.94, 1535.51, 1510.28, 1454.21.

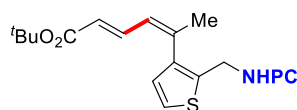

**Tert-butyl (2*E*,4*Z*)-5-(2-((pyrazine-2-carboxamido)methyl)thiophen-3-yl)hexa-2,4-dienoate (**7q**)**

Following the general procedure 1, **7q** was obtained as a yellow oil (46.2 mg, 80% yield).

**<sup>1</sup>H NMR** (500 MHz, CDCl<sub>3</sub>)

δ 9.40 (d, *J* = 1.5 Hz, 1H), 8.73 (d, *J* = 2.5 Hz, 1H), 8.50 (dd, *J* = 2.5, 1.5 Hz, 1H), 8.08 (s, 1H), 7.26 (s, 1H), 7.03 (dd, *J* = 15.5, 11.5 Hz, 1H), 6.84 (d, *J* = 5.0 Hz, 1H), 6.34 (d, *J* = 12.0 Hz, 1H), 5.81 (d, *J* = 15.5 Hz, 1H), 4.66 (d, *J* = 6.0 Hz, 2H), 2.15 (s, 3H), 1.41 (s, 9H).

**<sup>13</sup>C NMR** (125 MHz, CDCl<sub>3</sub>)

δ 166.52, 162.73, 147.29, 144.46, 144.27, 142.57, 142.47, 140.45, 138.99, 135.77, 127.81, 127.28, 125.01, 122.73, 80.16, 36.89, 28.12, 25.96.

**HRMS (ESI)** for C<sub>20</sub>H<sub>23</sub>N<sub>3</sub>O<sub>3</sub>SSNa [M+Na]<sup>+</sup>: 408.1352, found: 408.1355.

**FTIR** (KBr, cm<sup>-1</sup>)

3475.70, 3453.27, 3419.63, 2354.21, 2256.07, 1656.07, 1647.66,  
1633.64, 1622.43, 1614.02, 1403.74, 1392.52.

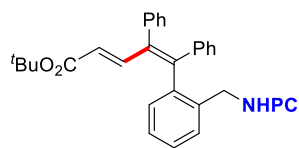

***Tert-butyl (2E,4E)-4,5-diphenyl-5-(2-((pyrazine-2-carboxamido)methyl)phenyl)penta-2,4-dienoate (7r)***

Following the general procedure 1, **7r** was obtained as a yellow oil (58.8 mg, 83% yield).

**<sup>1</sup>H NMR** (500 MHz, CDCl<sub>3</sub>)

δ 9.35 (d, *J* = 1.5 Hz, 1H), 8.68 (d, *J* = 2.5 Hz, 1H), 8.40 (dd, *J* = 2.5, 1.5 Hz, 1H), 7.65 (t, *J* = 5.0 Hz, 1H), 7.50 – 7.48 (m, 1H), 7.42 – 7.39 (m, 2H), 7.35 – 7.32 (m, 2H), 7.27 – 7.26 (m, 1H), 7.26 – 7.24 (m, 2H), 7.15 (d, *J* = 7.5 Hz, 2H), 7.01 – 6.98 (m, 3H), 6.92 – 6.90 (m, 2H), 5.49 (d, *J* = 15.5 Hz, 1H), 4.53 (dd, *J* = 14.5, 6.0 Hz, 1H), 4.45 (dd, *J* = 14.5, 5.5 Hz, 1H), 1.34 (s, 9H).

**<sup>13</sup>C NMR** (125 MHz, CDCl<sub>3</sub>)

δ 165.35, 161.41, 146.03, 145.73, 143.37, 143.28, 143.25, 141.27, 139.45, 139.25, 137.56, 137.31, 135.03, 130.54, 129.84, 129.38, 128.91, 127.83, 127.35, 126.89, 126.67, 126.30, 126.26, 123.06, 79.10, 40.48, 27.02.

**HRMS (ESI)** for C<sub>33</sub>H<sub>31</sub>N<sub>3</sub>O<sub>3</sub>Na [M+Na]<sup>+</sup>: 540.2258, found: 540.224.

**FTIR** (KBr, cm<sup>-1</sup>)

3850.97, 3742.29, 3627.10, 3565.42, 2359.81, 1790.65, 1731.78,  
1684.11, 1651.44, 1633.64, 1507.48, 1457.01, 669.16.

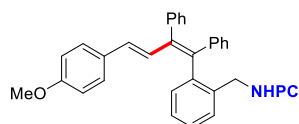

***N-(2-((1E,3E)-4-(4-methoxyphenyl)-1,2-diphenylbuta-1,3-dien-1-yl)benzyl)pyrazine-2-carboxamide (7s)***

Following the general procedure 1, **7s** was obtained as a brown oil (48.7 mg, 62% yield).

**<sup>1</sup>H NMR** (500 MHz, CDCl<sub>3</sub>)

δ 9.31 (d, *J* = 1.5 Hz, 1H), 8.55 (d, *J* = 2.5 Hz, 1H), 8.11 (dd, *J* =

2.5, 1.5 Hz, 1H), 7.81 (t,  $J$  = 6.0 Hz, 1H), 7.54 (dd,  $J$  = 6.0, 2.5 Hz, 1H), 7.41 – 7.39 (m, 3H), 7.30 – 7.25 (m, 3H), 7.25 – 7.23 (m, 2H), 7.01 – 6.96 (m, 5H), 6.92 – 6.90 (m, 2H), 6.71 – 6.68 (m, 3H), 6.15 (d,  $J$  = 16.0 Hz, 1H), 4.55 (d,  $J$  = 6.0 Hz, 2H), 3.75 (s, 3H).

**$^{13}\text{C}$  NMR** (125 MHz,  $\text{CDCl}_3$ )

$\delta$  161.45, 158.21, 145.84, 143.33, 143.14, 141.15, 140.74, 140.03, 139.57, 138.45, 138.31, 135.45, 131.72, 130.88, 130.25, 129.33, 129.08, 128.97, 127.41, 127.17, 127.10, 126.88, 126.72, 126.53, 125.96, 125.30, 112.87, 54.24, 40.72.

**HRMS (ESI)** for  $\text{C}_{35}\text{H}_{29}\text{N}_3\text{O}_2\text{K}$   $[\text{M}+\text{K}]^+$ : 562.1891, found: 562.1877.

**FTIR** (KBr,  $\text{cm}^{-1}$ )

3565.42, 3422.43, 3383.18, 3335.51, 3276.64, 3122.43, 3063.55, 2959.81, 2354.21, 1689.72, 1653.27, 1636.45, 1538.32, 1510.28, 1403.74, 1022.43.

## 5. Scaled-up Preparation and Directing Group Removal

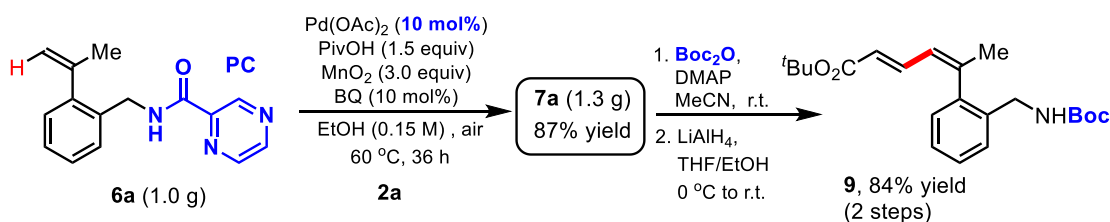

### 5.1 Scaled-up preparation

An screw-cap tube was charged with Pd(OAc)<sub>2</sub> (10 mol%, 0.39 mmol), MnO<sub>2</sub> (3.0 equiv, 11.7 mmol), BQ (10 mol%, 0.39 mmol), amide **6a** (1.0 equiv, 3.9 mmol), EtOH (26.0 mL). Then, pivalic acid (1.5 equiv, 5.98 mmol), and olefin **2** (2.5 equiv, 9.88 mmol) were added into the solution in sequence. The vial was sealed under air and heated to 60 °C with stirring for 36 h. After cooling down, the mixture was directly applied to a flash column chromatography (PE/EA). Product **7a** was obtained as a white solid (1.3 g, 87% yield).

## 5.2 Directing Group Removal Reaction<sup>[10]</sup>

Boc-anhydride (5.0 equiv, 1.0 mmol) was added to a solution of **7a** (75.8 mg, 0.2 mmol) and DMAP (2.0 equiv, 0.4 mmol) in MeCN (2 mL) and the reaction mixture was stirred overnight. The reaction mixture was quenched with sat. aq NH<sub>4</sub>Cl (5 mL) and extracted with CH<sub>2</sub>Cl<sub>2</sub> (3 × 20 mL). The combined organic extracts were dried (MgSO<sub>4</sub>), concentrated under reduced pressure and purified by column chromatography (PE / EA) to give amide (**9-i**). Then to a solution of amide in THF/EtOH (1:1, 0.02 M) was added dropwise LiAlH<sub>4</sub> (2.0 equiv) over 30 min at 0°C and stirred at r.t. for 2 h, and 2 M NaOH was added slowly until a clear solution was obtained. The layer was separated and the aqueous phase was extracted with Et<sub>2</sub>O (20 mL × 3). Combined the organic layers and dried over Na<sub>2</sub>SO<sub>4</sub>. After removing the solvent under reduced pressure, the residue was purified by column chromatography on silica gel with EtOAc and the resulting amine (**9**) was purified by silica gel chromatography (SiO<sub>2</sub>, PE/EA = 2/1).

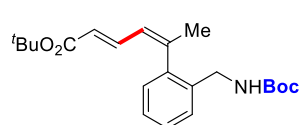

**Tert-butyl (2E,4Z)-5-(2-(((tert-butoxycarbonyl)amino)methyl)phenyl)hexa-2,4-dienoate (**9**)**

Following the procedure, **12** was obtained as a white solid (63.0 mg, 84% yield for two steps, m.p. = 118-119 °C).

**<sup>1</sup>H NMR** (500 MHz, CDCl<sub>3</sub>)  
δ 7.36 (d, *J* = 7.0 Hz, 1H), 7.30 – 7.24 (m, 2H), 7.03 – 7.02 (m, 1H), 6.79 (dd, *J* = 15.5, 11.5 Hz, 1H), 6.29 (d, *J* = 12.0 Hz, 1H), 5.77 (d, *J* = 15.5 Hz, 1H), 4.76 (s, 1H), 4.30 (dd, *J* = 15.0, 6.5 Hz, 1H), 4.08 (dd, *J* = 15.0, 5.0 Hz, 1H), 2.14 (s, 3H), 1.43 (s, 9H), 1.41 (s, 9H).

**<sup>13</sup>C NMR** (125 MHz, CDCl<sub>3</sub>)  
δ 166.56, 155.71, 147.42, 140.52, 139.77, 135.58, 128.50, 128.28, 127.98, 127.56, 126.54, 122.27, 80.09, 79.33, 42.15, 28.39, 28.13, 26.56.

**HRMS (ESI)** for C<sub>22</sub>H<sub>32</sub>NO<sub>4</sub> [M+ H]<sup>+</sup>: 374.2326, found: 374.2316.

**FTIR** (KBr, cm<sup>-1</sup>)  
3417.26, 2926.17, 2856.07, 1651.63, 1644.90, 1633.89, 1557.38, 1538.50, 1505.23, 806.54.

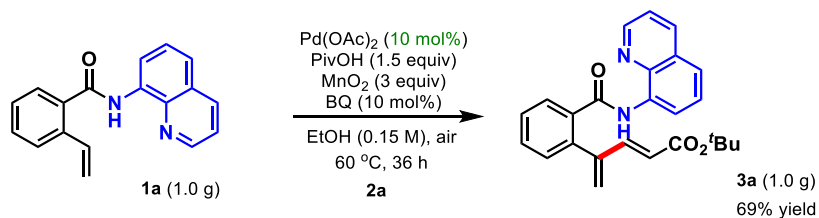

An screw-cap vial was charged with  $\text{Pd}(\text{OAc})_2$  (81.9 mg, 10 mol%, 0.365 mmol),  $\text{MnO}_2$  (3.0 equiv, 10.9 mmol), BQ (39.4 mg, 10 mol%, 0.365 mmol), amide **1a** (1.0 g, 1.0 equiv, 3.65 mmol), EtOH (25 mL). Then, pivalic acid (0.559 g, 1.5 equiv, 5.48 mmol), and olefin **2a** (1.16 g, 2.5 equiv, 9.1 mmol) were added into the solution in sequence. The vial was sealed under air and heated to 60 °C with stirring for 36 h. After cooling down, the mixture was directly applied to a flash column chromatography (PE/EA mixtures) to afford **3a** in 69% yield (1 g).

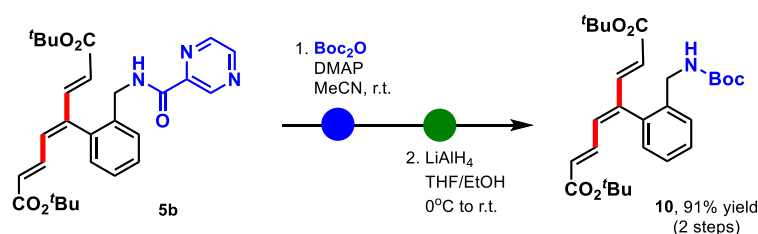

$\text{Boc}$ -anhydride (5.0 equiv, 0.5 mmol) was added to a solution of **5b** (49.2 mg, 0.1 mmol) and DMAP (2.0 equiv, 0.2 mmol) in MeCN (1 mL) and the reaction mixture was stirred 4 h. The reaction mixture was quenched with sat. aq  $\text{NH}_4\text{Cl}$  (5 mL) and extracted with  $\text{CH}_2\text{Cl}_2$  ( $3 \times 20$  mL). The combined organic extracts were dried ( $\text{MgSO}_4$ ), concentrated under reduced pressure and purified by column chromatography ( $\text{SiO}_2$ , PE / EA = 20:1 to 10: 1) to give amide. Then to a solution of amide in THF/EtOH (1:1, 0.02 M) was added dropwise  $\text{LiAlH}_4$  (2.0 equiv) over 30 min at 0°C and stirred at r.t. for 2 h, and 2 M NaOH was added slowly until a clear solution was obtained. The layer was separated and the aqueous phase was extracted with  $\text{Et}_2\text{O}$  (20 mL  $\times$  3). Combined the organic layers and dried over  $\text{Na}_2\text{SO}_4$ . After removing the solvent under reduced pressure, the residue was purified by column chromatography on silica gel with EtOAc and the resulting amine (**10**) was purified by silica gel chromatography ( $\text{SiO}_2$ , PE/EA = 20:1).

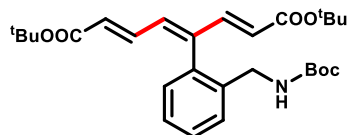

**di-Tert-butyl (2E,4Z,6E)-4-(2-(((tert-butoxycarbonyl) amino) methyl)phenyl)octa-2,4,6-trienedioate (**10**)**

Following the procedure, **10** was obtained as a white solid (44.4 mg, 91% yield for two steps, m.p. = 47-48 °C).

**<sup>1</sup>H NMR** (500 MHz, CDCl<sub>3</sub>)

δ 7.46 (d, J = 15.4 Hz, 1H), 7.43 (d, J = 7.5 Hz, 1H), 7.37 (t, J = 7.4 Hz, 1H), 7.34 – 7.29 (m, 1H), 7.01 (d, J = 7.3 Hz, 1H), 6.85 (dd, J = 15.2, 11.7 Hz, 1H), 6.69 (d, J = 11.7 Hz, 1H), 6.01 (d, J = 15.2 Hz, 1H), 5.34 (d, J = 15.5 Hz, 1H), 4.62 (s, 1H), 4.15 (dd, J = 14.9, 5.9 Hz, 1H), 4.05 (dd, J = 14.7, 5.6 Hz, 1H), 1.45 (s, 9H), 1.42 (s, 9H), 1.41 (s, 9H).

**<sup>13</sup>C NMR** (125 MHz, CDCl<sub>3</sub>)

δ 164.81, 164.66, 154.54, 144.53, 144.19, 137.87, 135.85, 134.57, 133.23, 128.91, 127.88, 127.81, 126.75, 126.41, 124.19, 79.73, 79.66, 78.29, 41.26, 27.33, 27.07, 27.04.

**HRMS (ESI)** for Na [M+Na]<sup>+</sup>: 508.2670, found: 508.2676.

## 6. References

- 1) Robert M.; Yang P.; Emre B. K.; Gerhard H. *Chem. Eur. J.* **2018**, *24*, 15781–15785.
- 2) Liu. M.; Yang. P.; Karunananda. M. K.; Wang. Y.; Liu. P.; Engle. K. M. *J. Am. Chem. Soc.*, **2018**, *140*, 5805.
- 3) Hemric. B.N.; Shen. K.; Wang. Q. *J. Am. Chem. Soc.* **2016**, *138*, 5813–5816.
- 4) Choi. S.-Y.; Kim H.D.; Park. J.-U; Park. S.; Kim. J.-H. *Org. Lett.* **2019**, *21* 10038–10042
- 5) Schreib. B. S.; Carreira. E. M. *J. Am. Chem. Soc.* **2019**, *141*, 8758–8763.
- 6) H. Xie.; Z. Ye.; Z. Ke.; J. Lan.; H. Jiang.; W. Zeng. *Chem. Sci.*, **2018**, *9*, 985
- 7) T. Zhang.; Y-X. Luan.; S-J. Zheng.; Q. Peng.; M. Ye. *Angew. Chem. Int. Ed.* **2020**, *59*, 7439–7443
- 8) Santhosh. R.; M. Nibin. J.; Kandikere. R. P. *J. Org. Chem.* **2018**, *83*, 13707–13715.
- 9) Zhang. J.; Wang. E.; Zhou. Y.; Zhang. L.; Chen. M.; Lin. X. *J. Org. Chem. Front.*, **2020**, *7*, 1490
- 10) Talbot. E-P. A.; Fernandes. T.; McKenna. J. M.; Toste. F. D. *J. Am. Chem. Soc.* **2014**, *136*, 4101–4104
- 11) Li. J.; Chin. E.; Lu. A. S.; Chen. L. *Tetrahedron. Lett.*, **2010**, *51*, 5937-5939.

## 7. $^1\text{H}$ / $^{13}\text{C}$ NMR Charts

### 7.1 $^1\text{H}$ / $^{13}\text{C}$ NMR Charts of Substrates

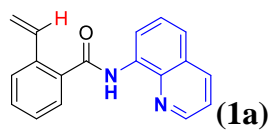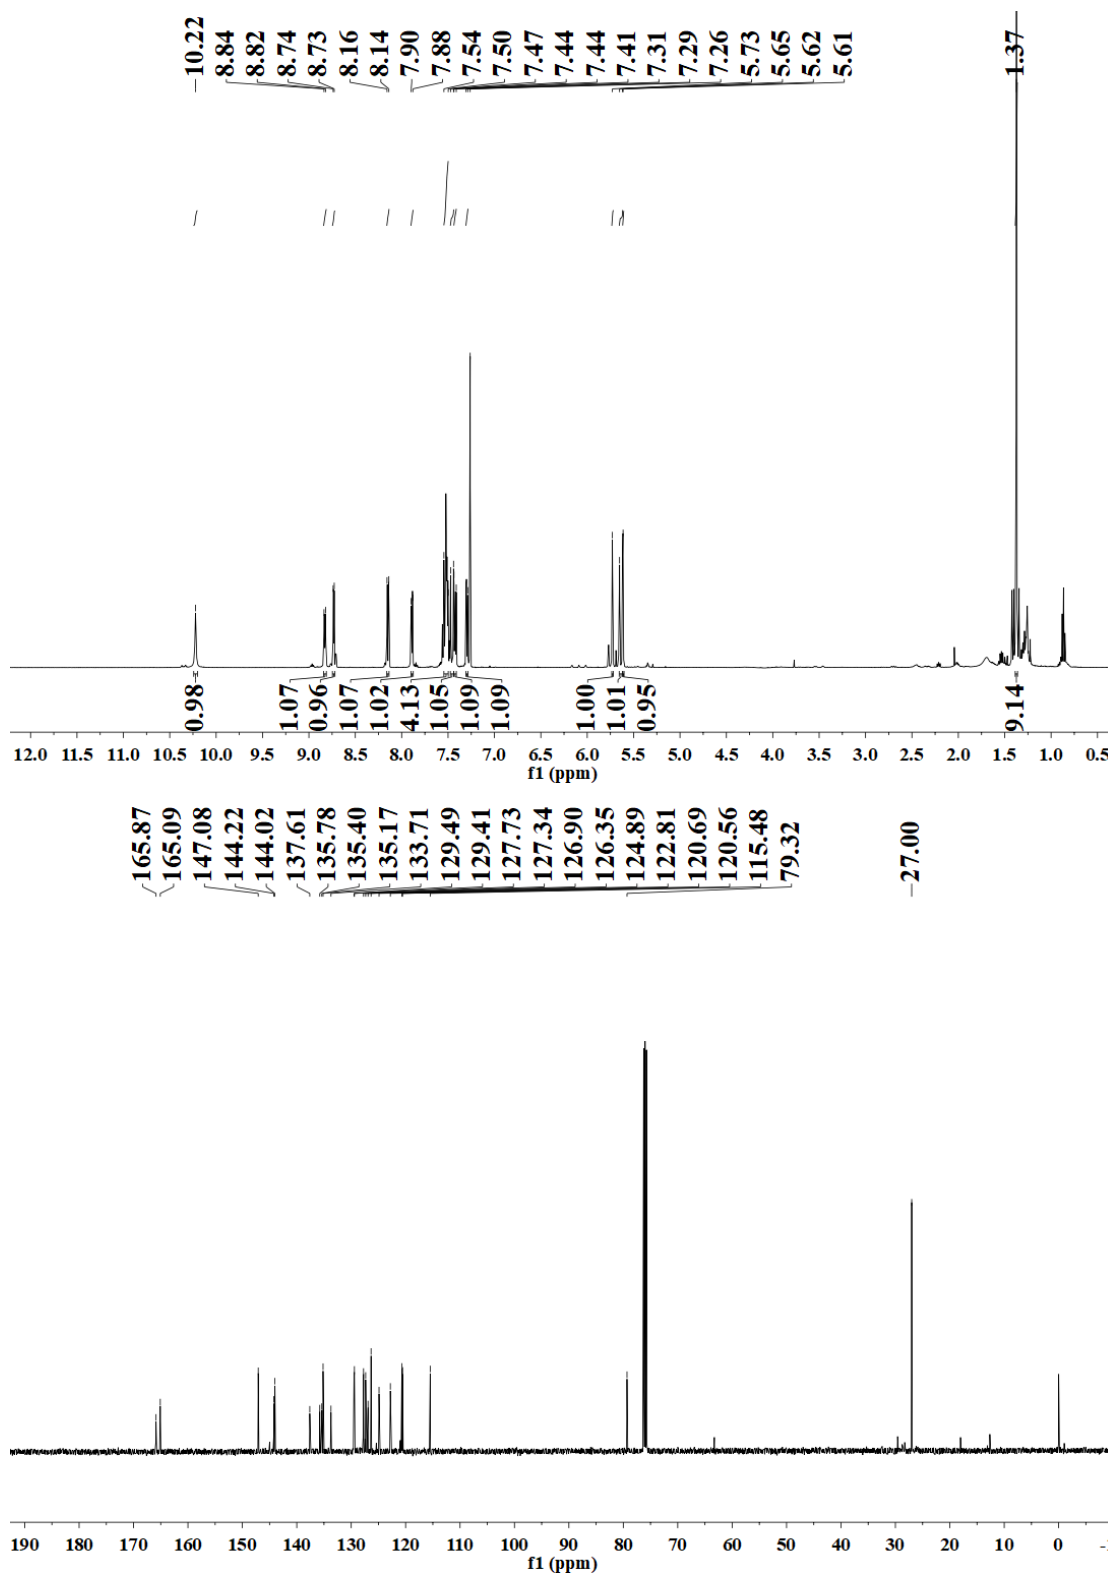



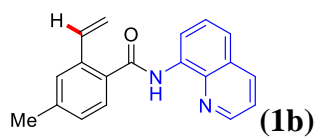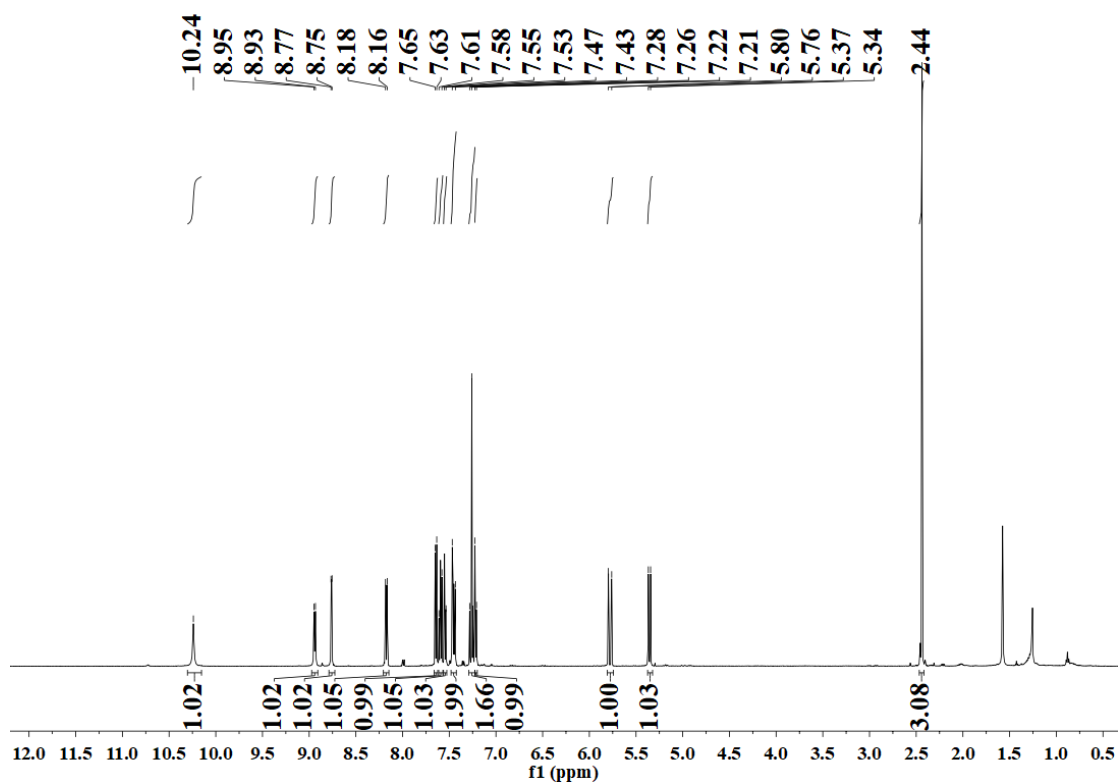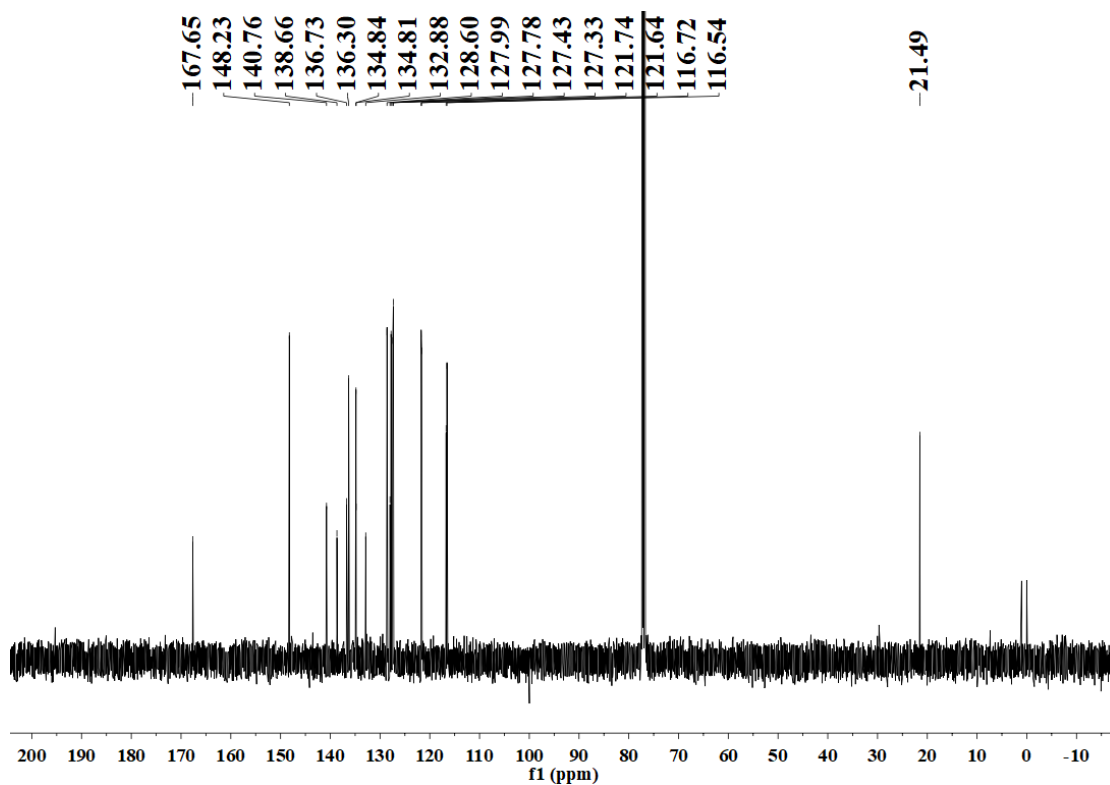

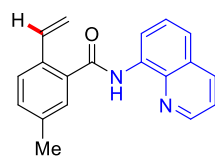

(1c)

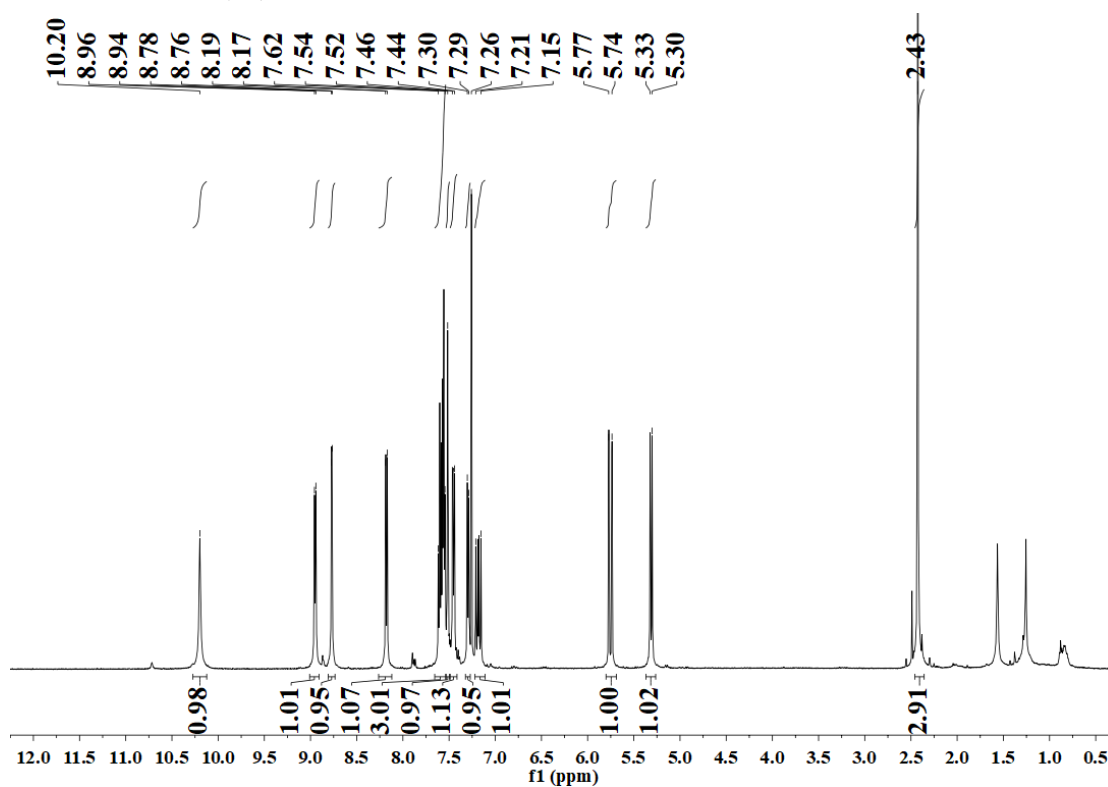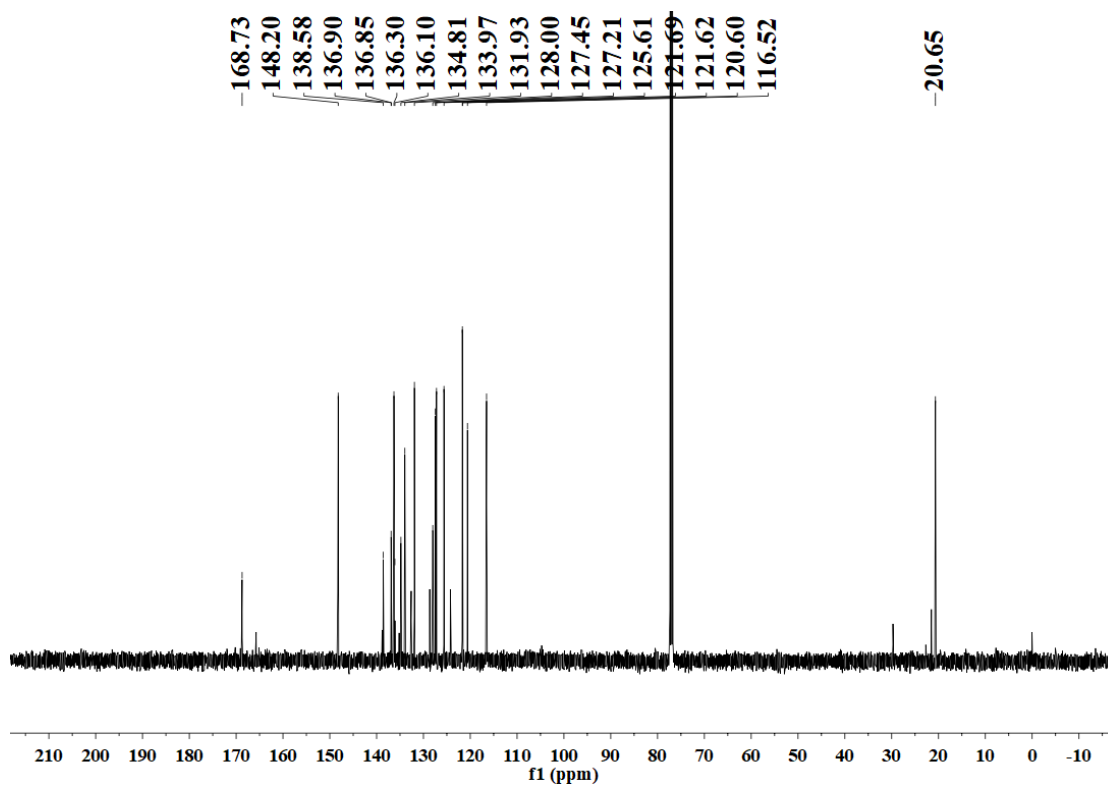

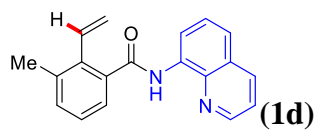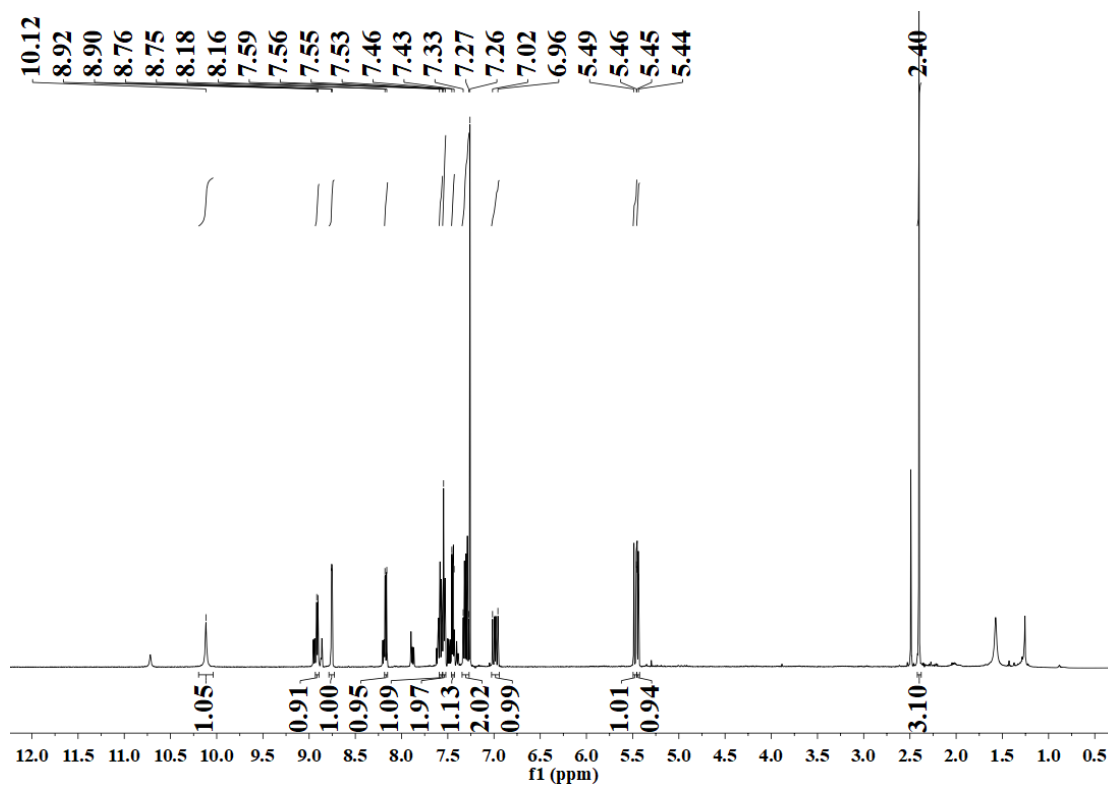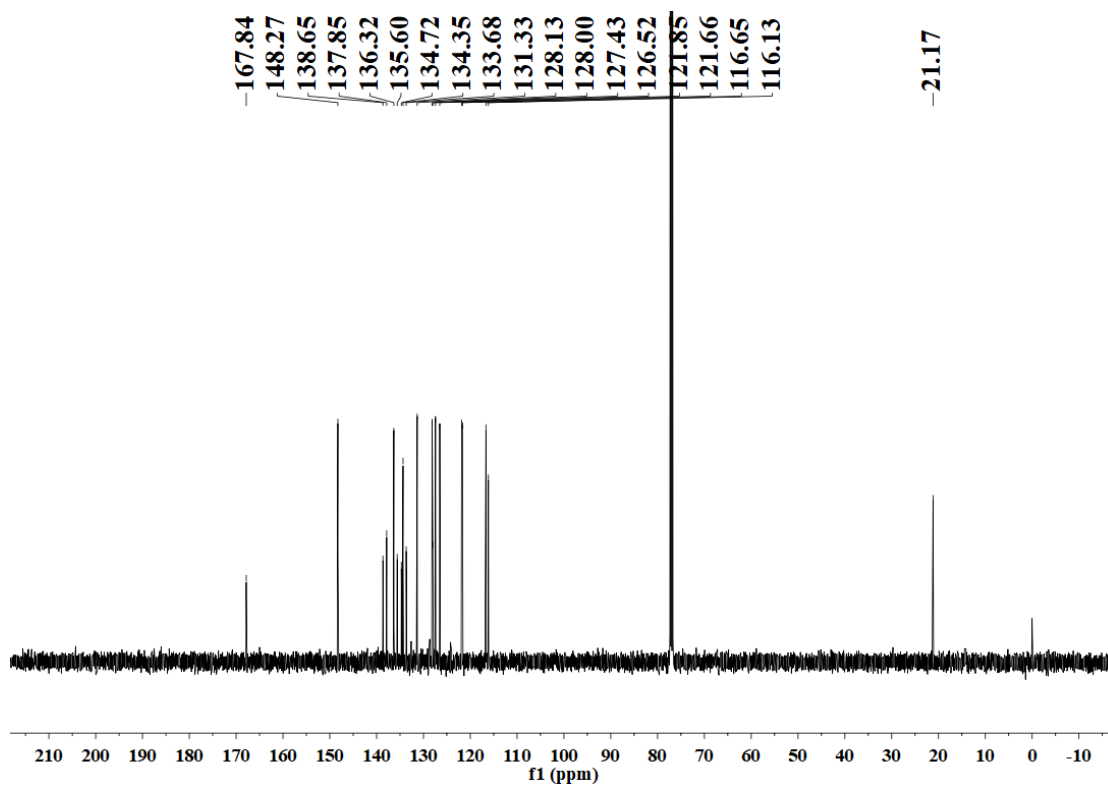

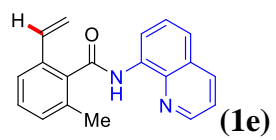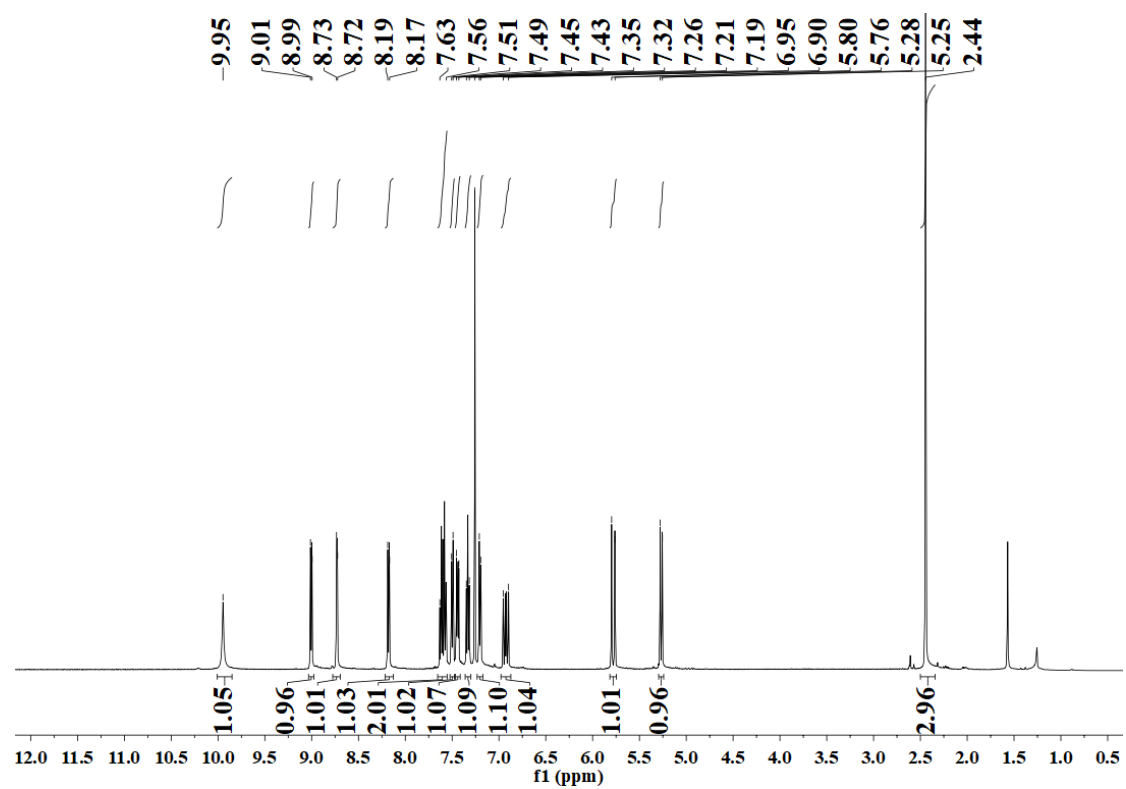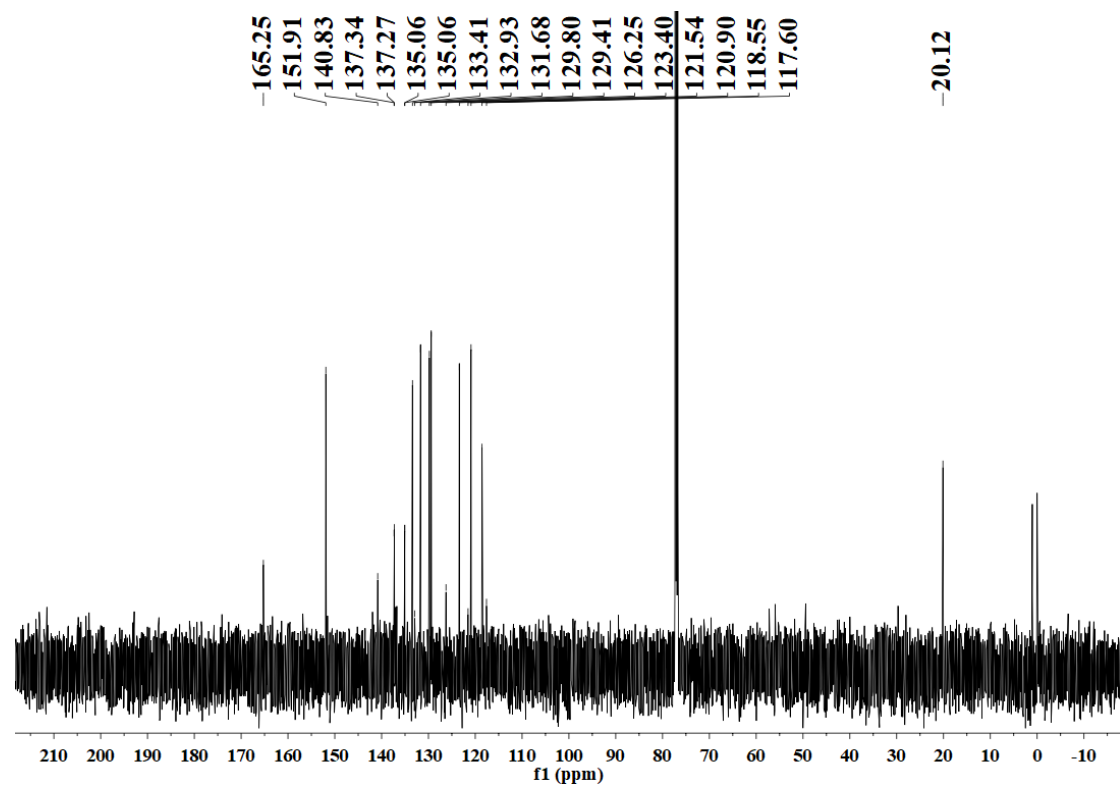

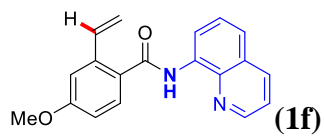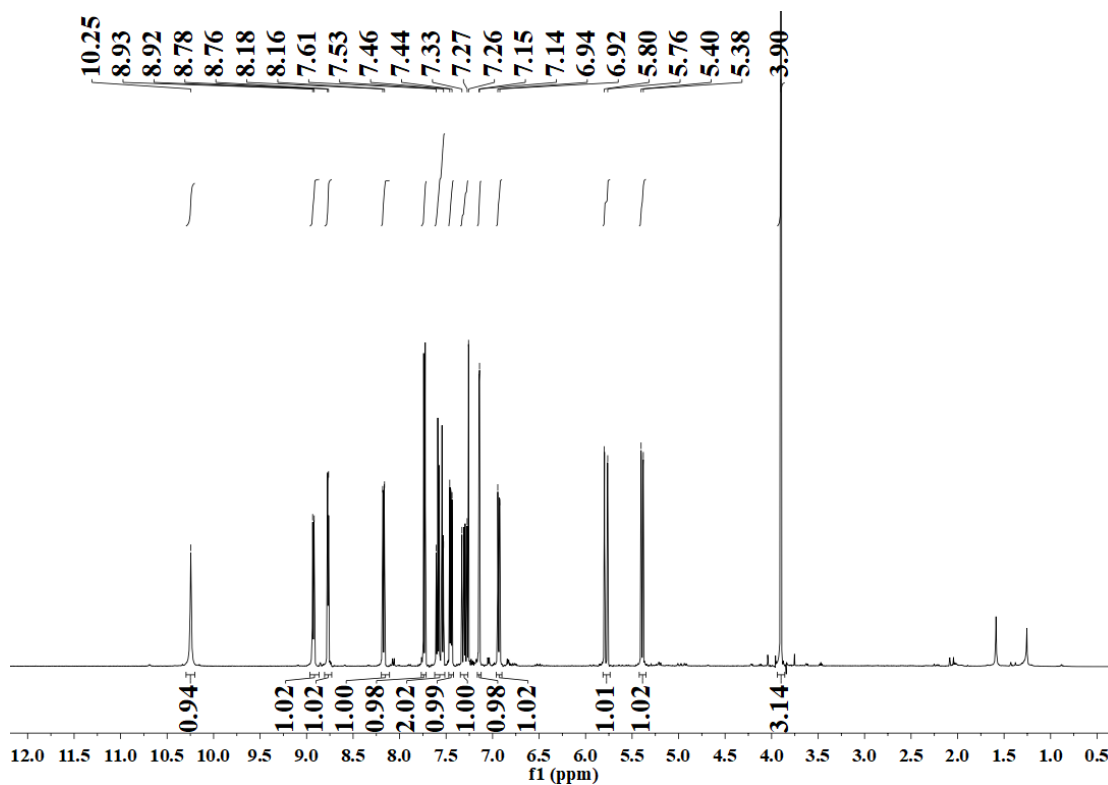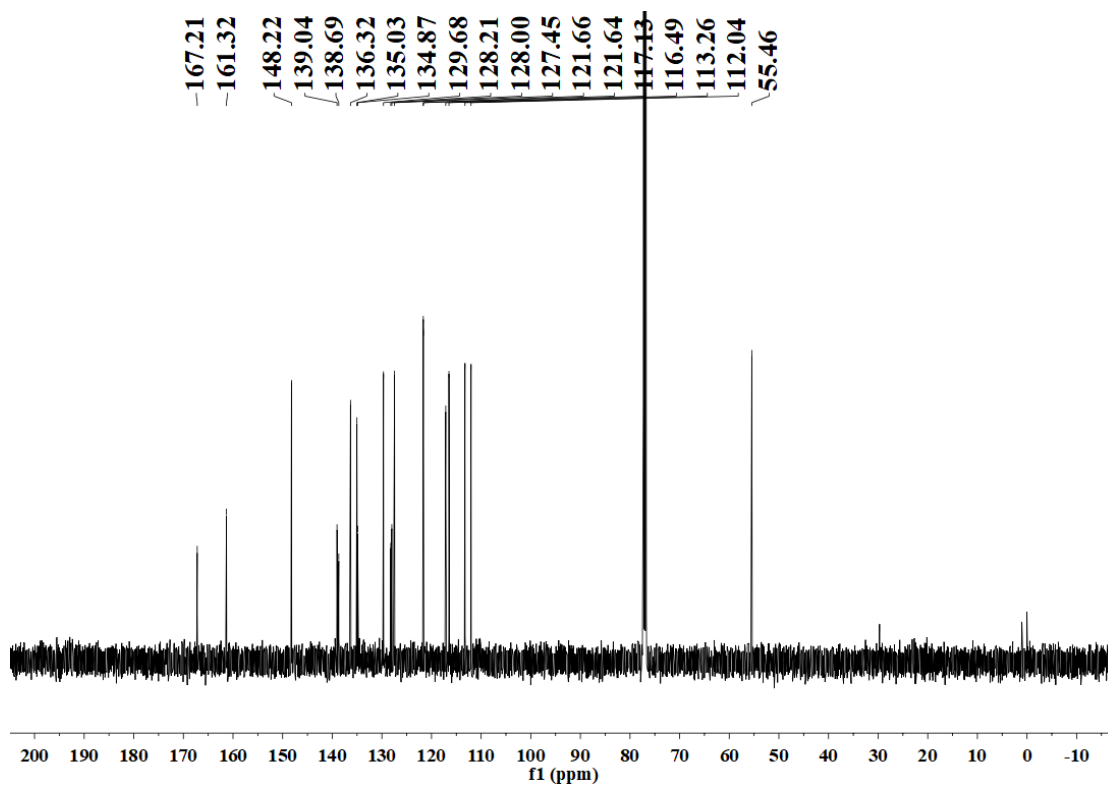

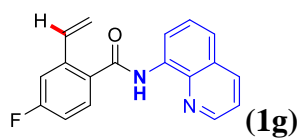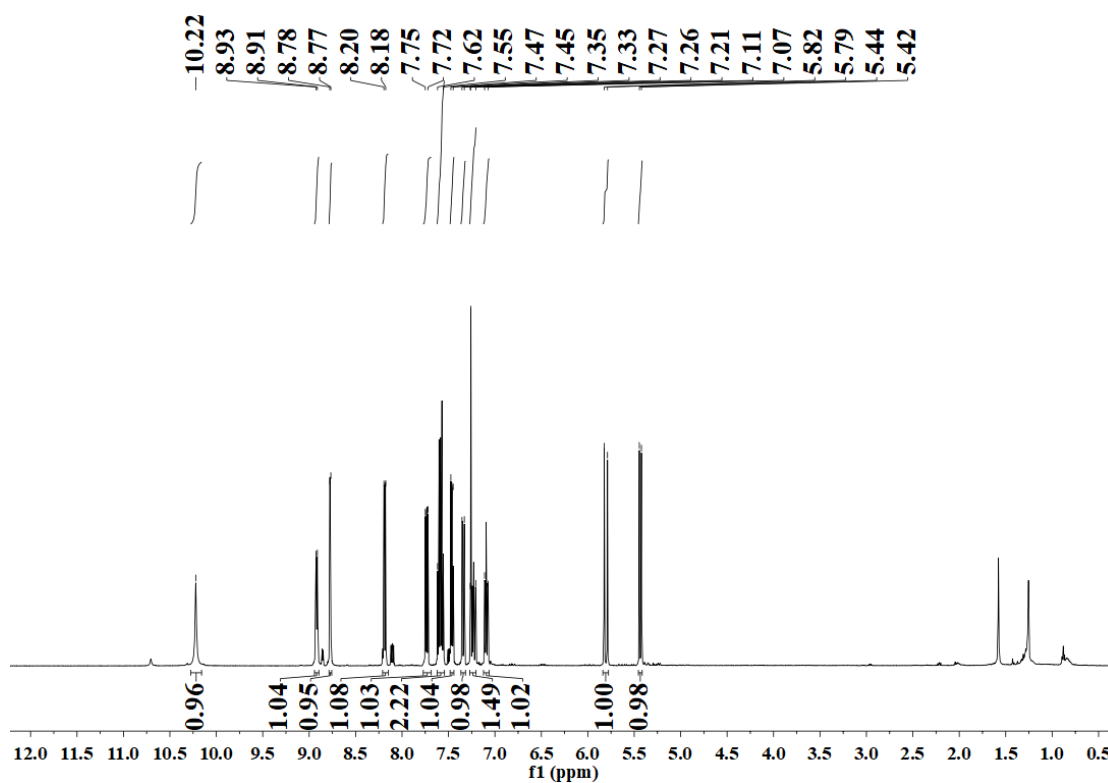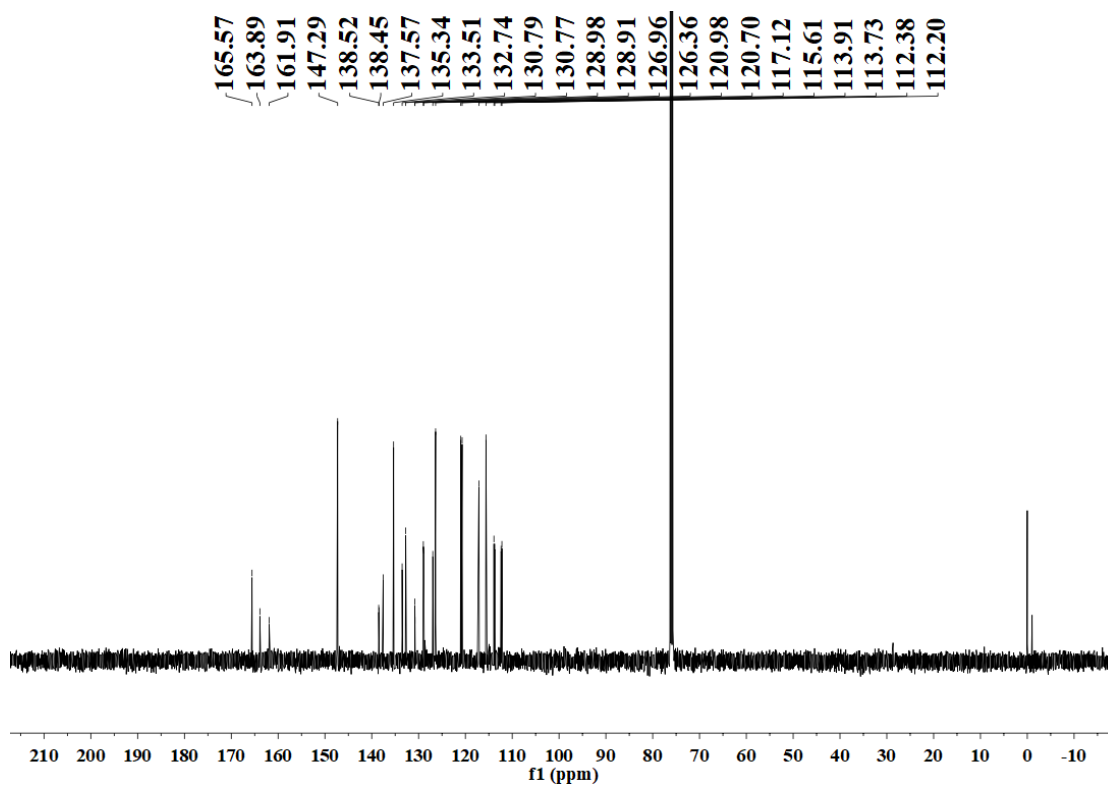

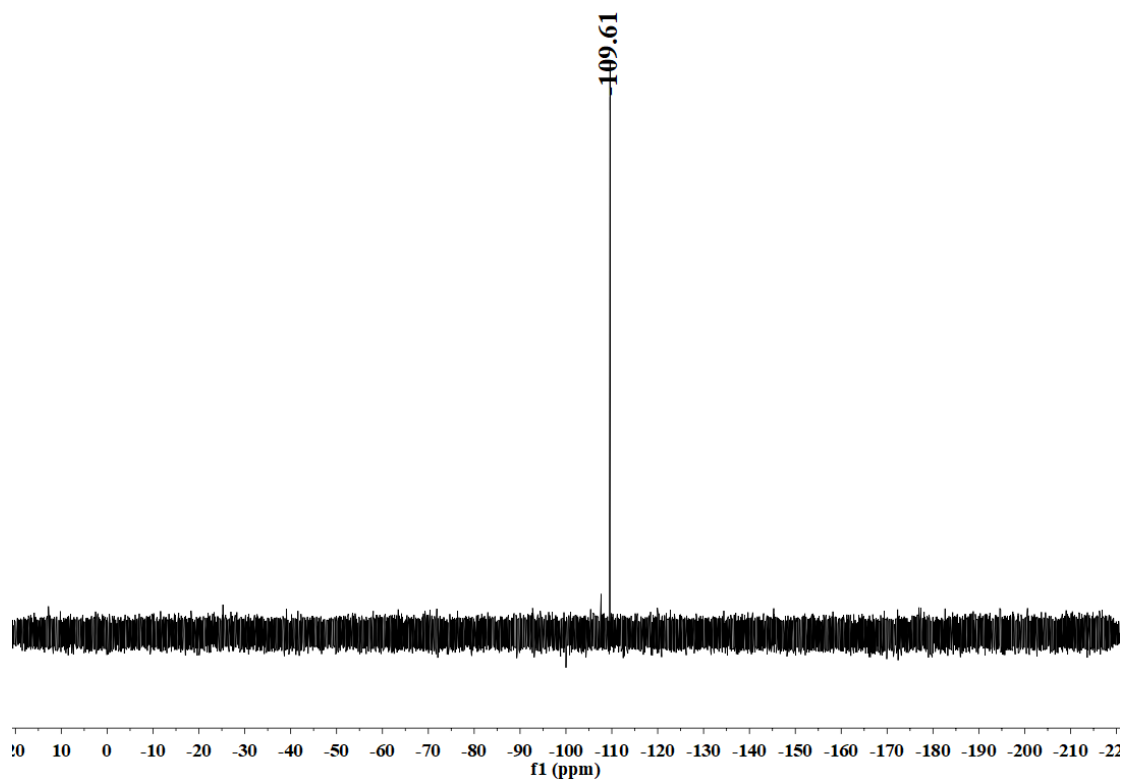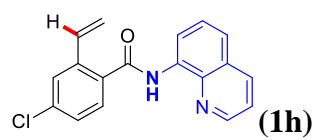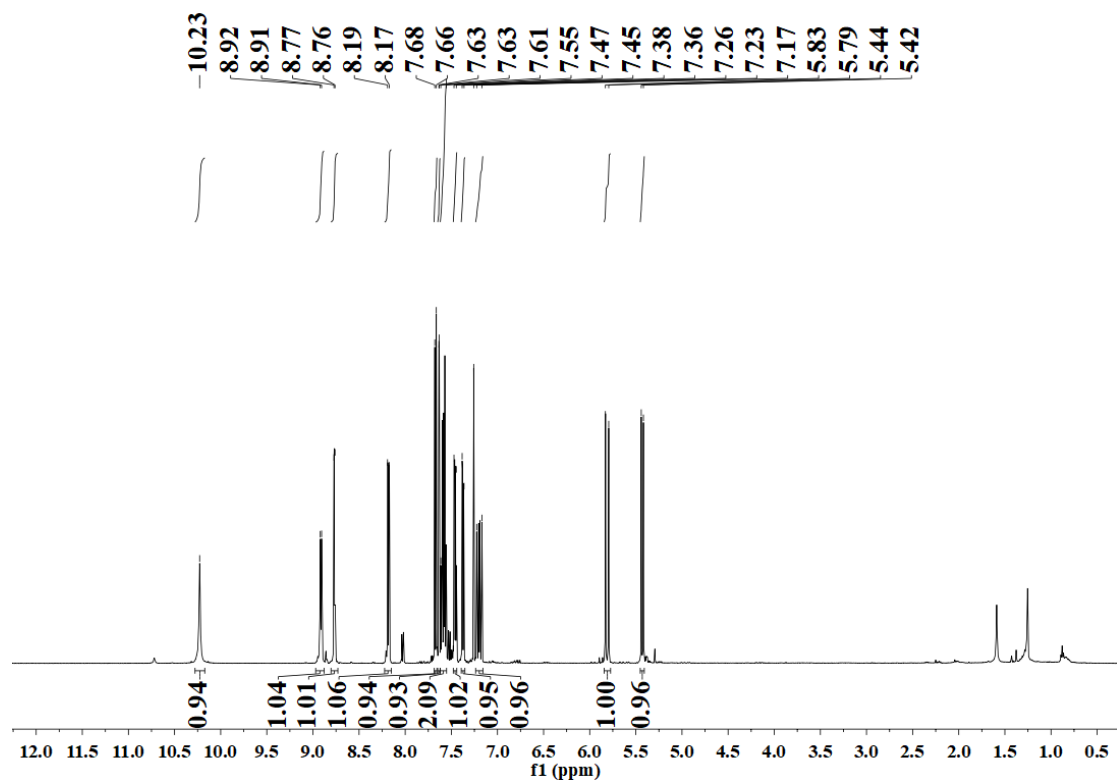

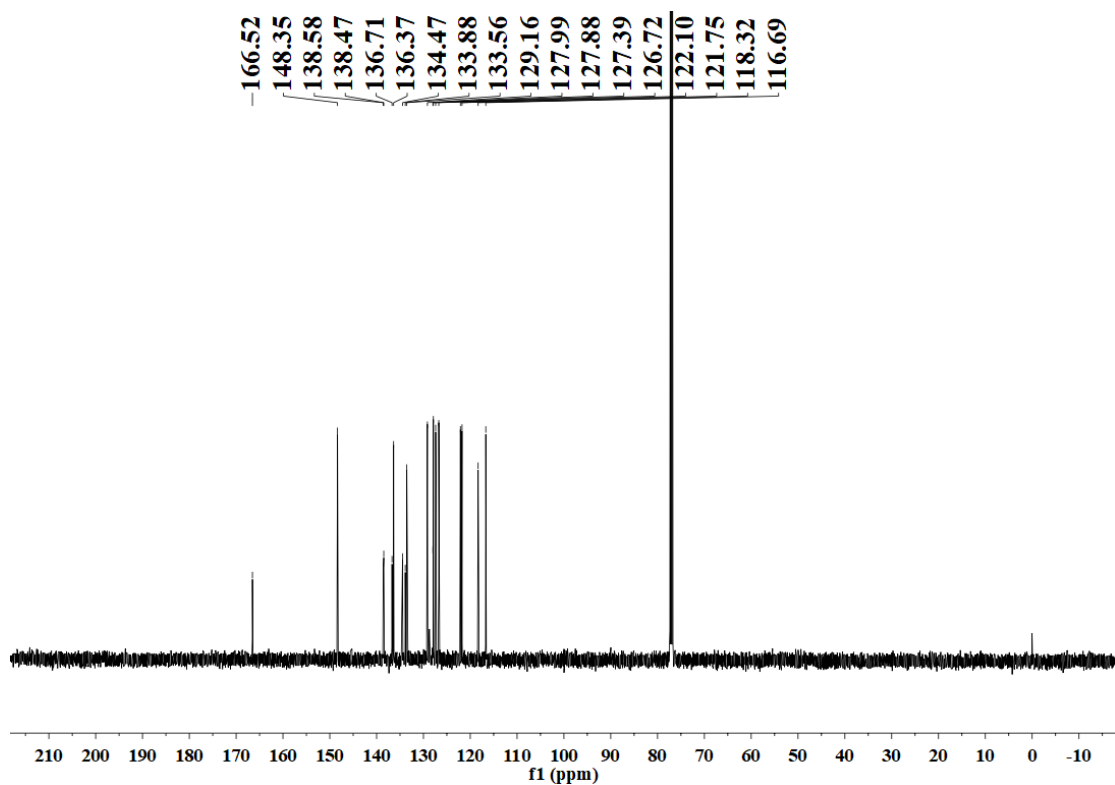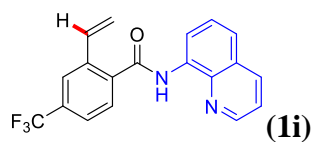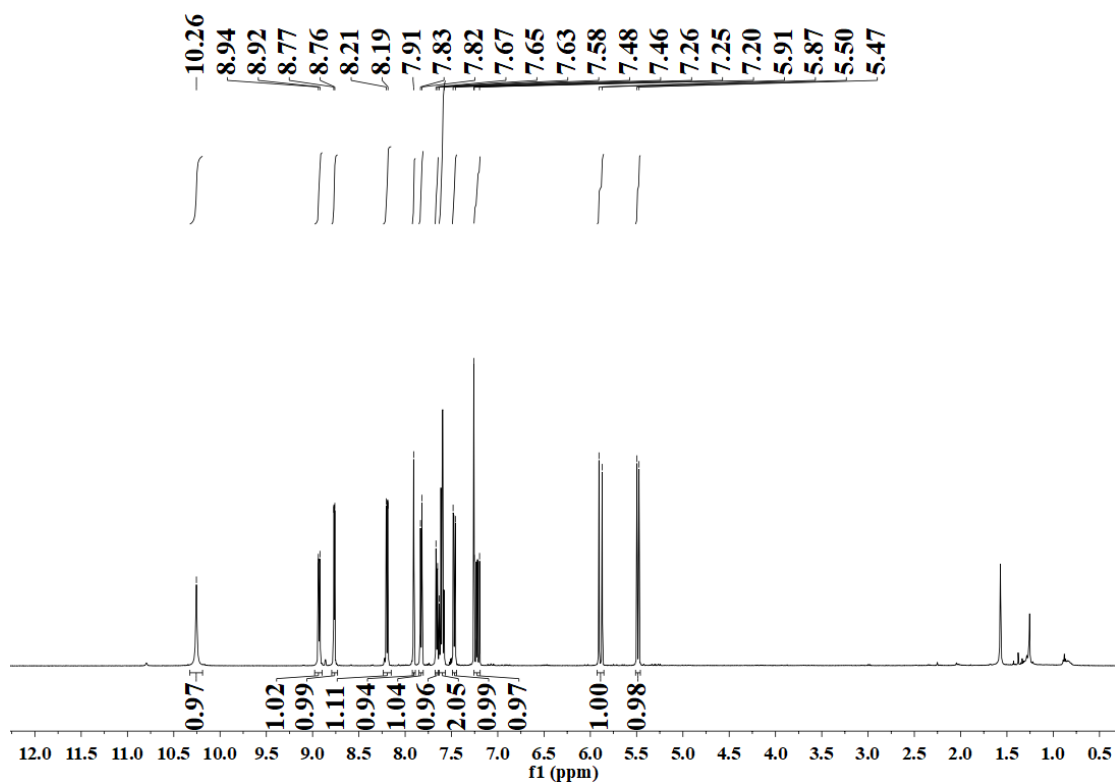



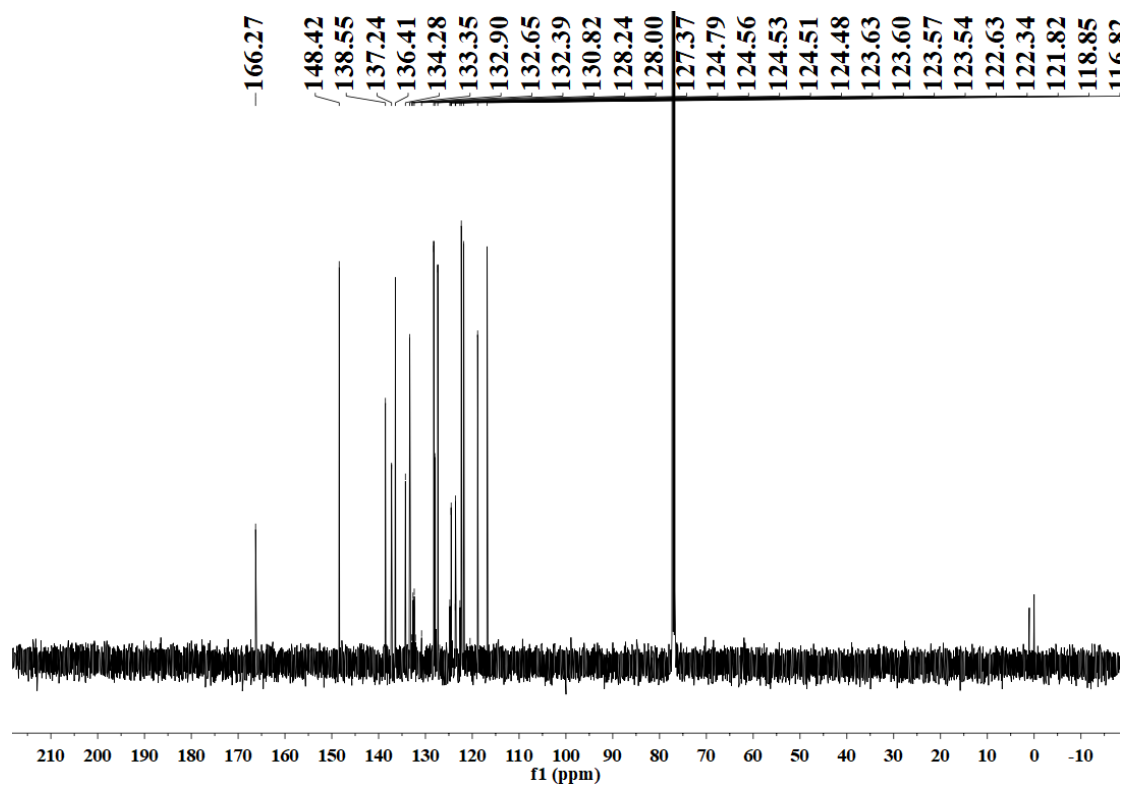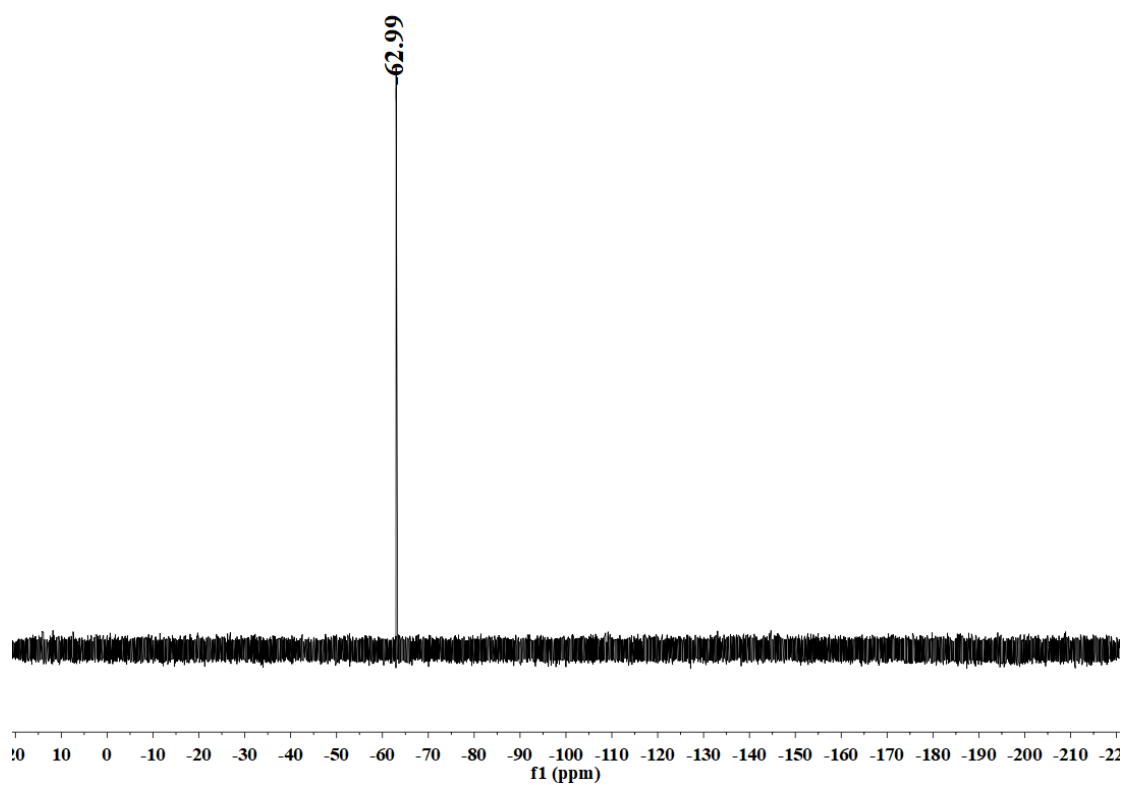

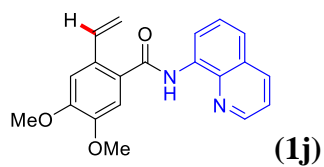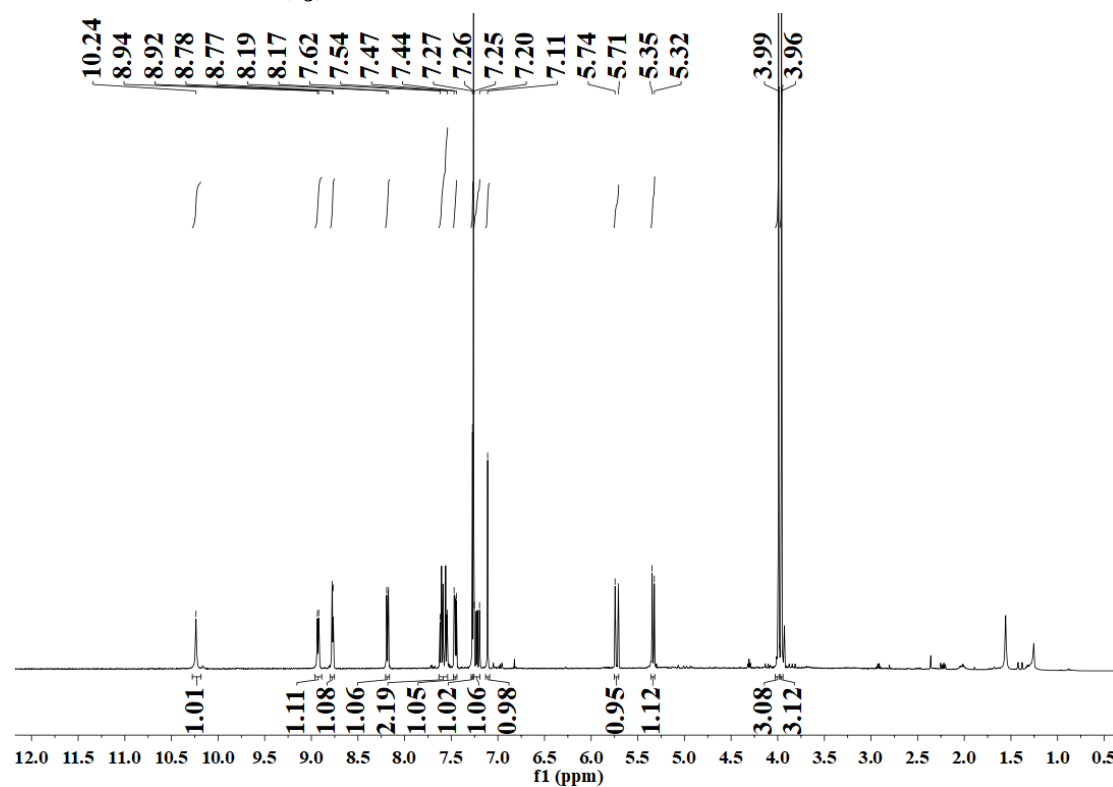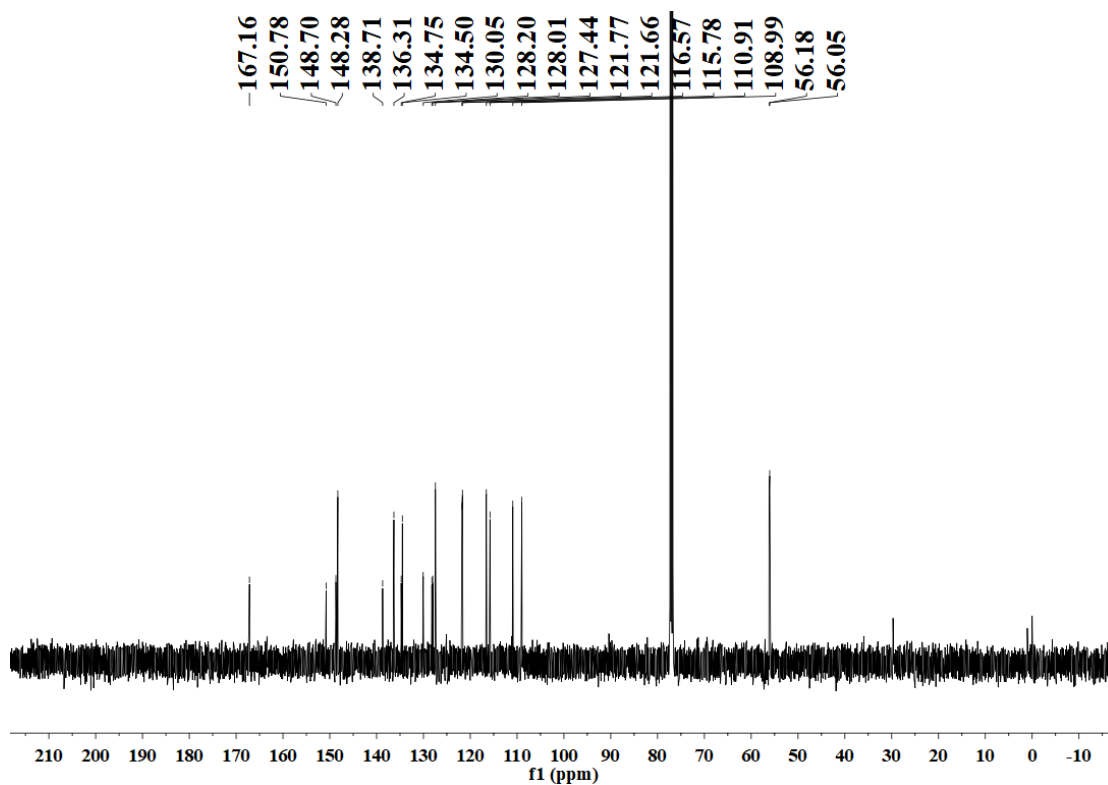

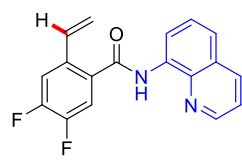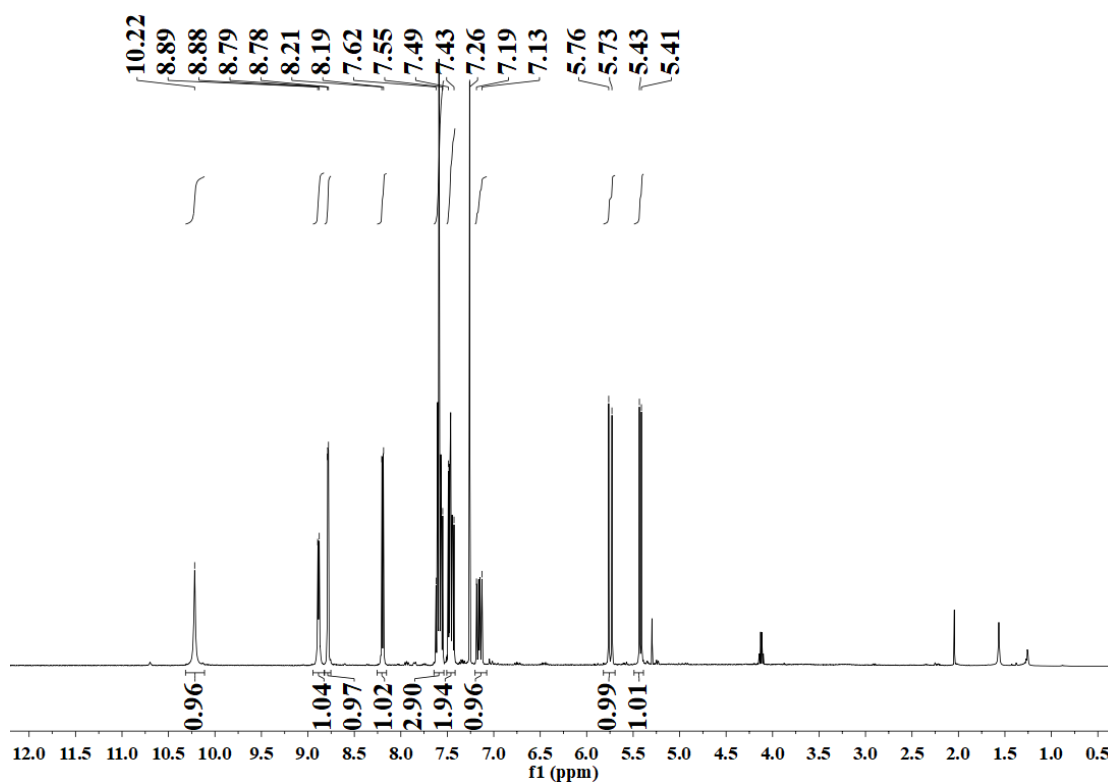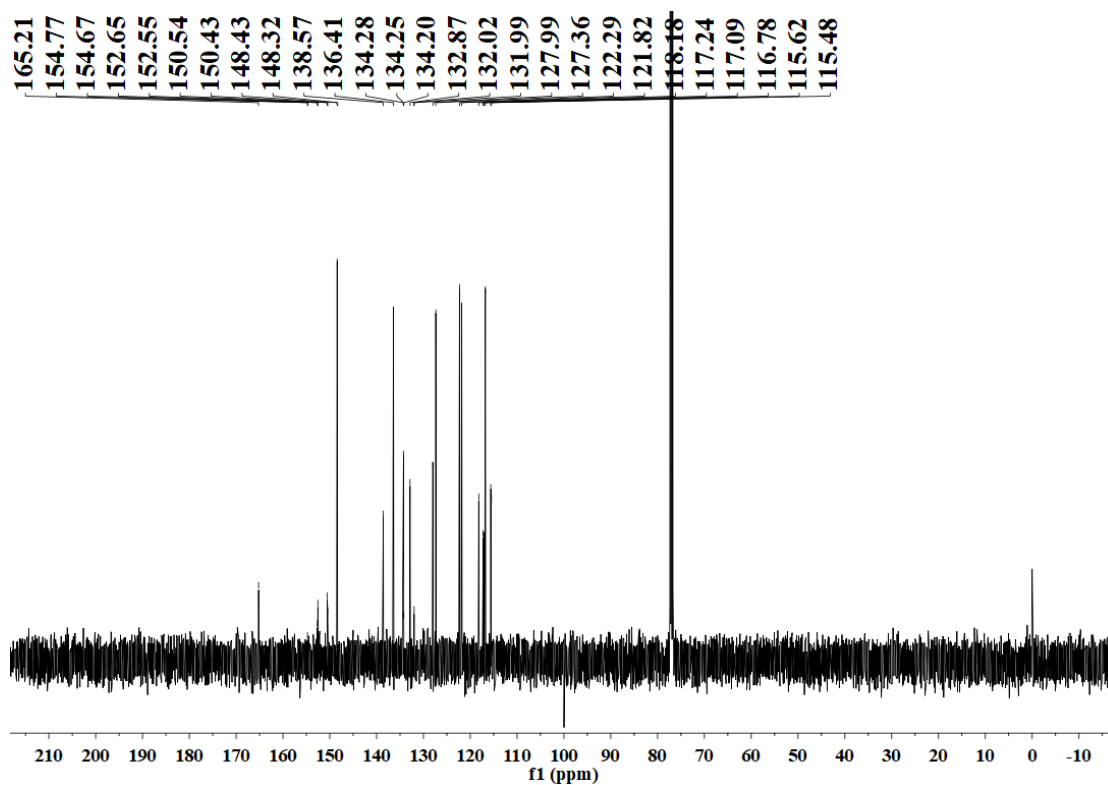

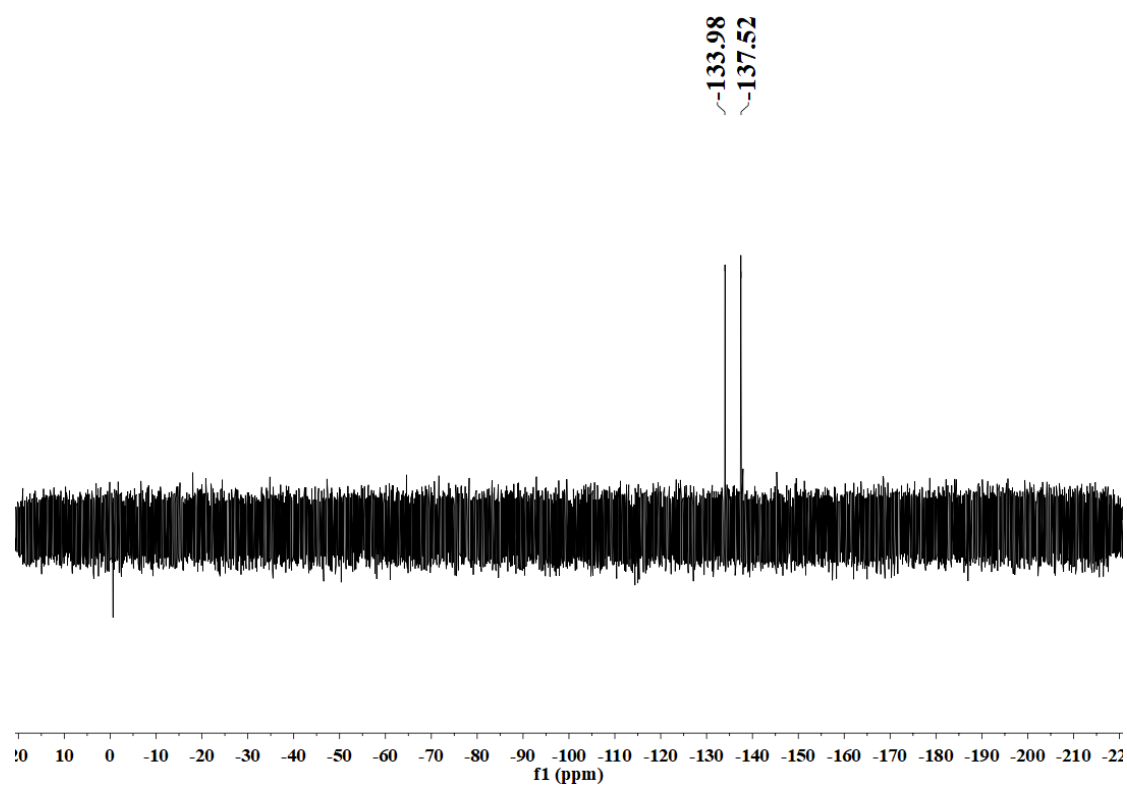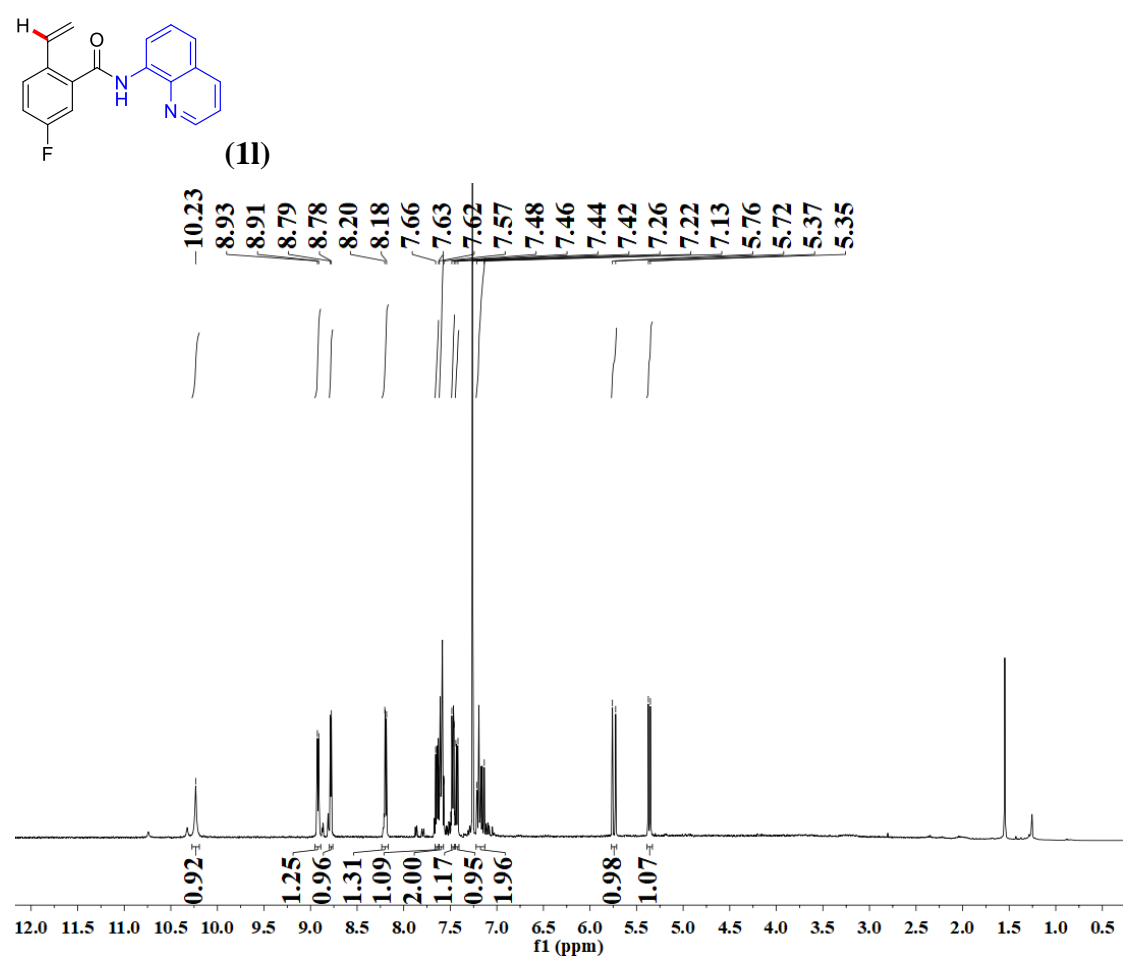

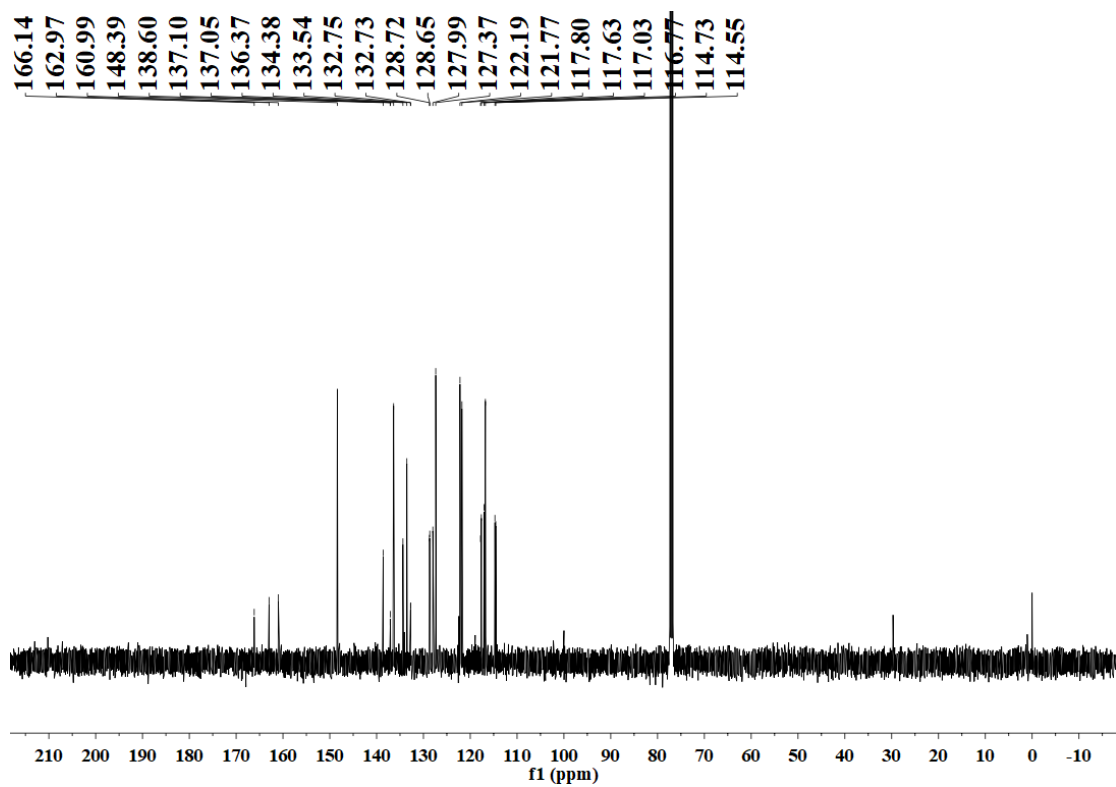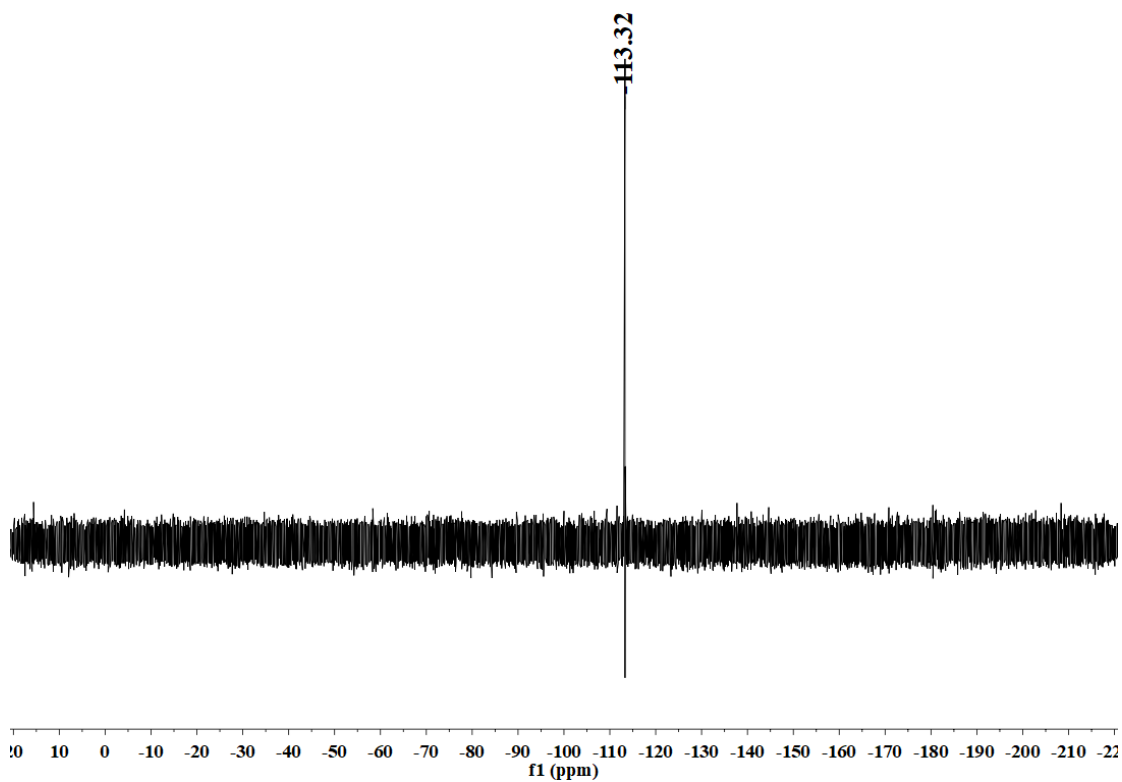

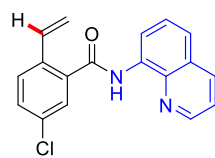

(1m)

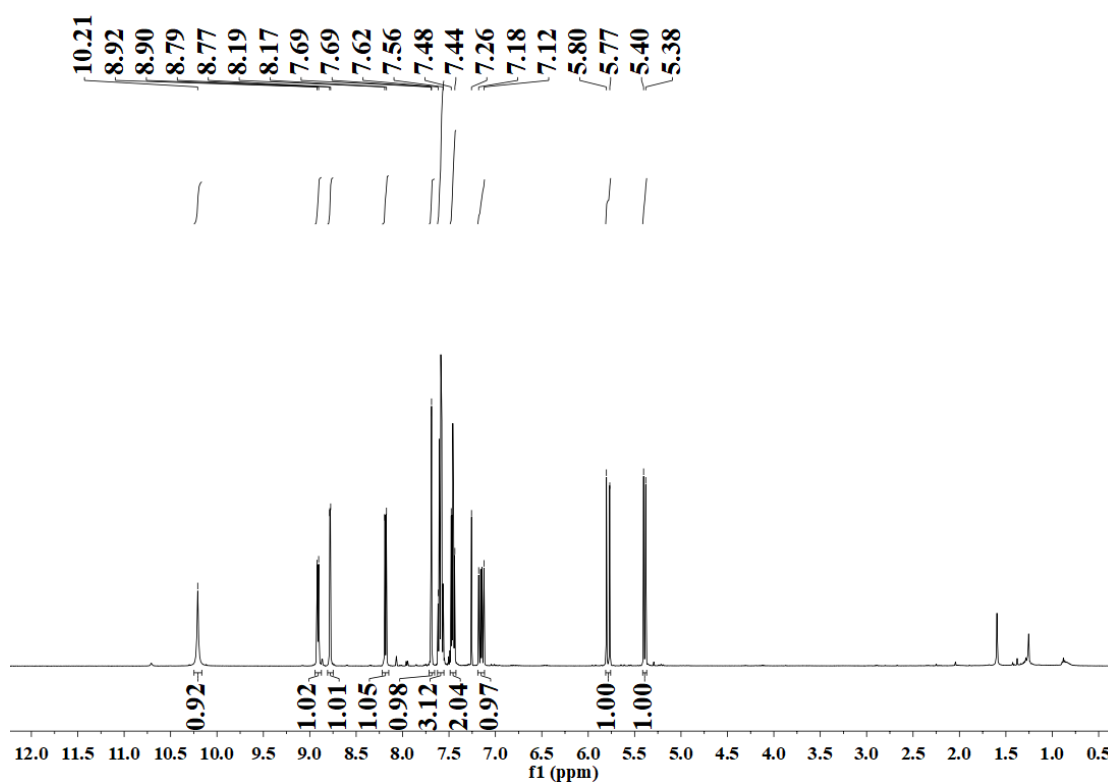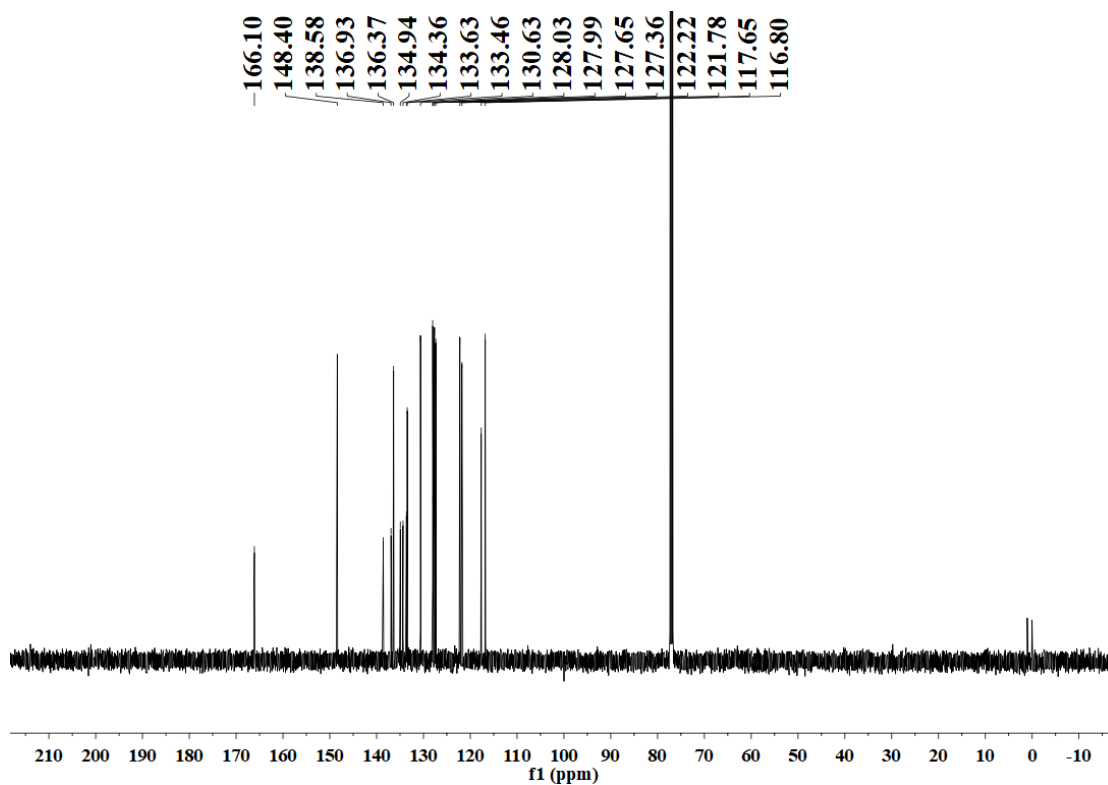

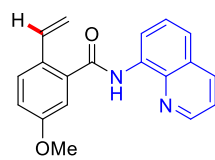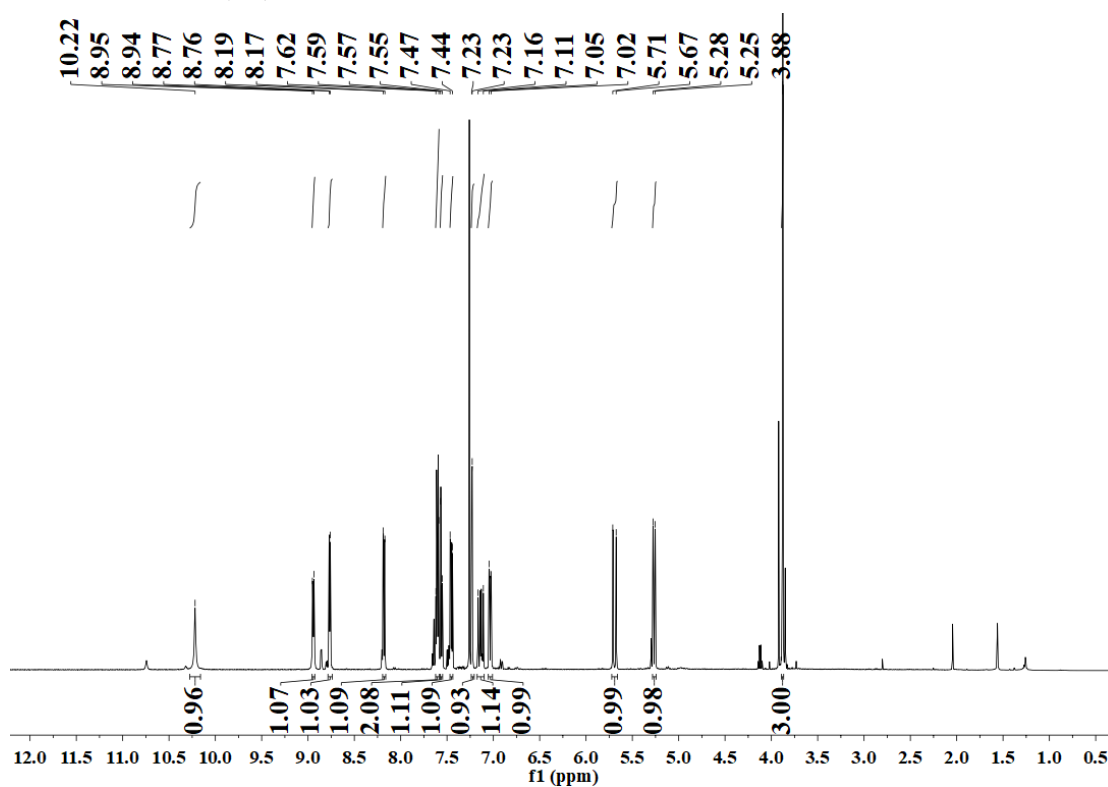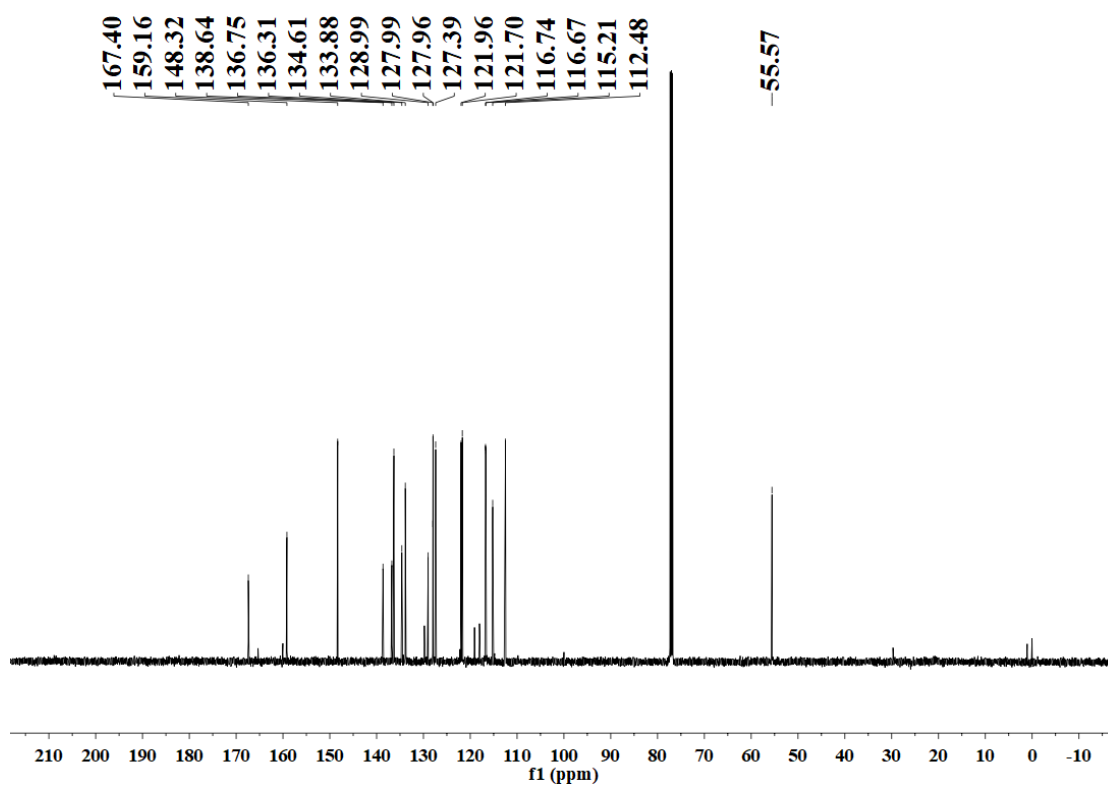

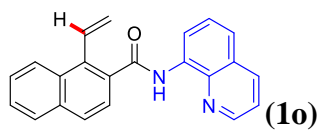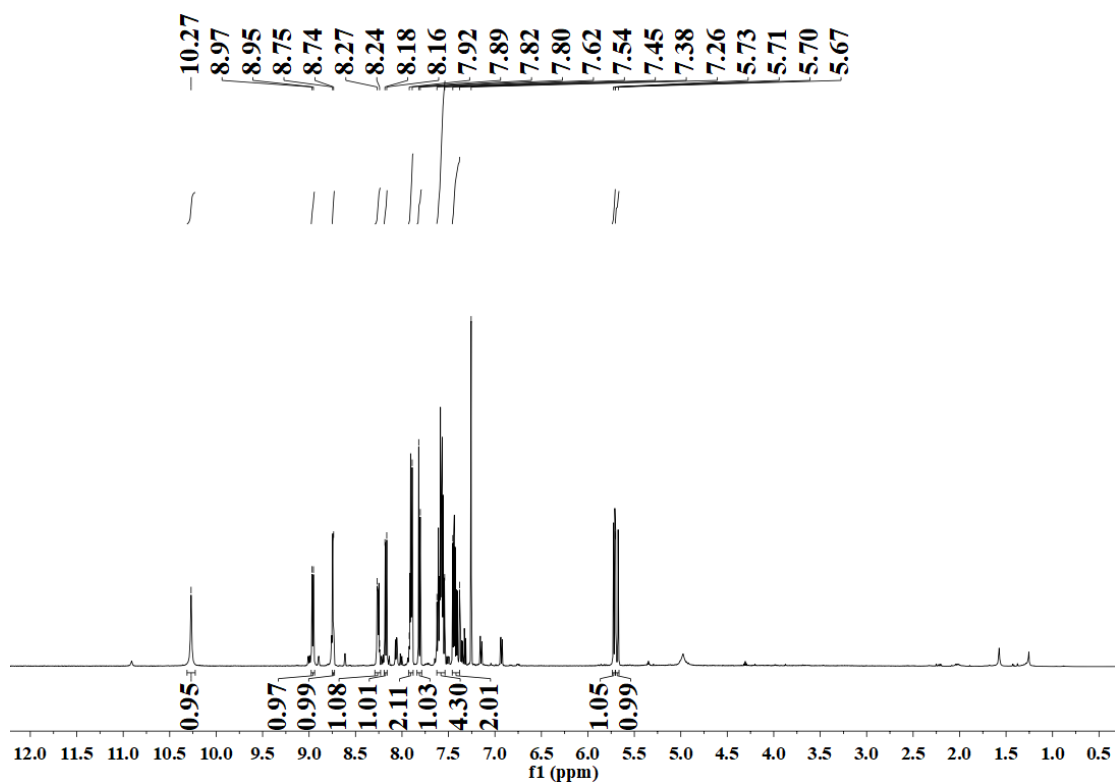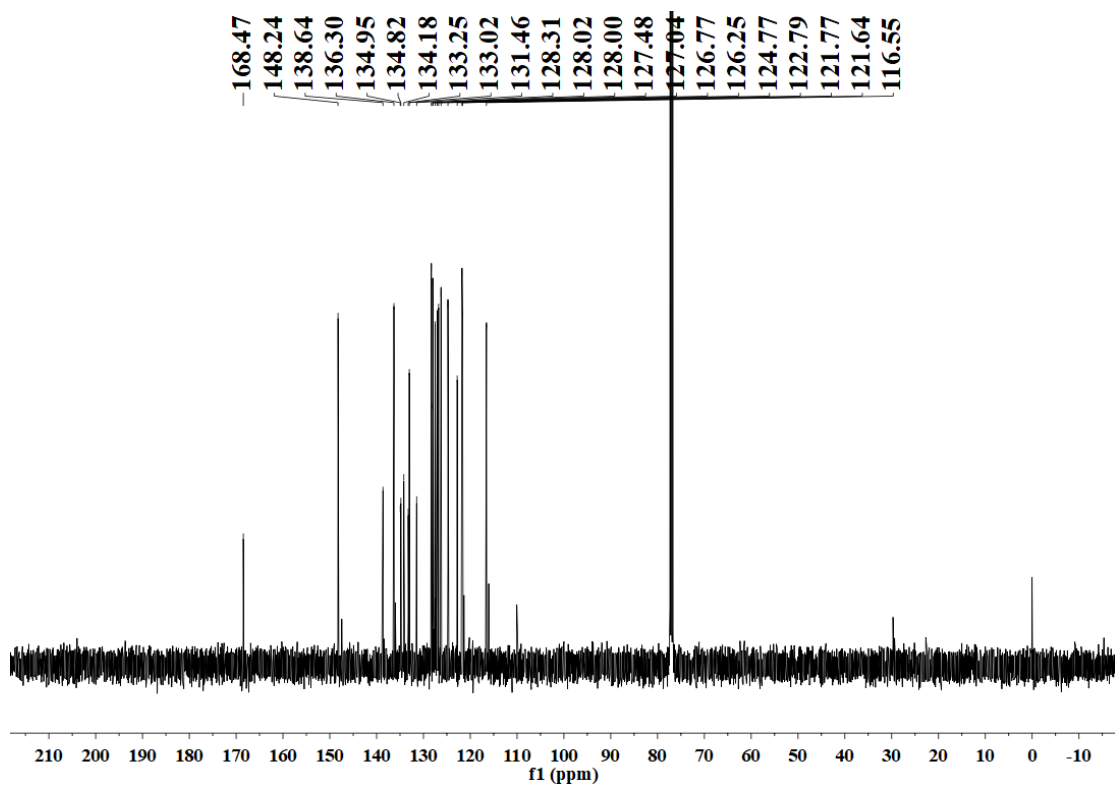



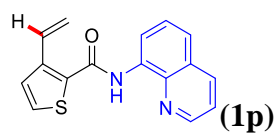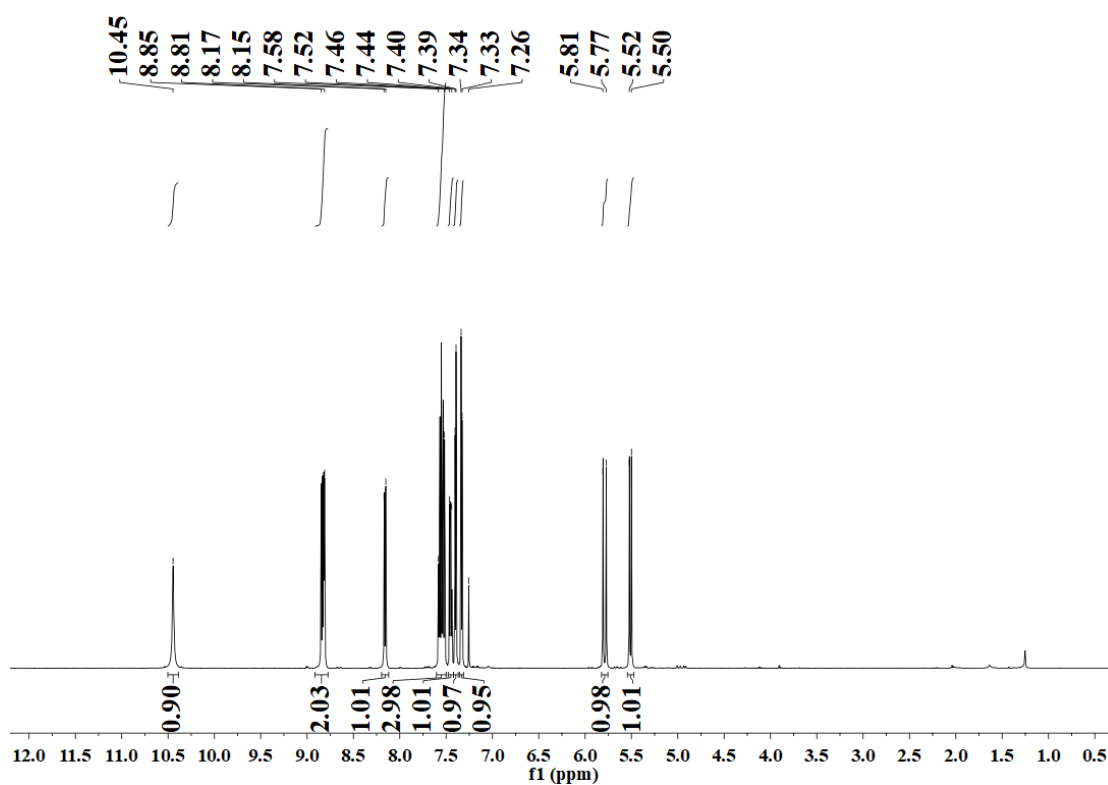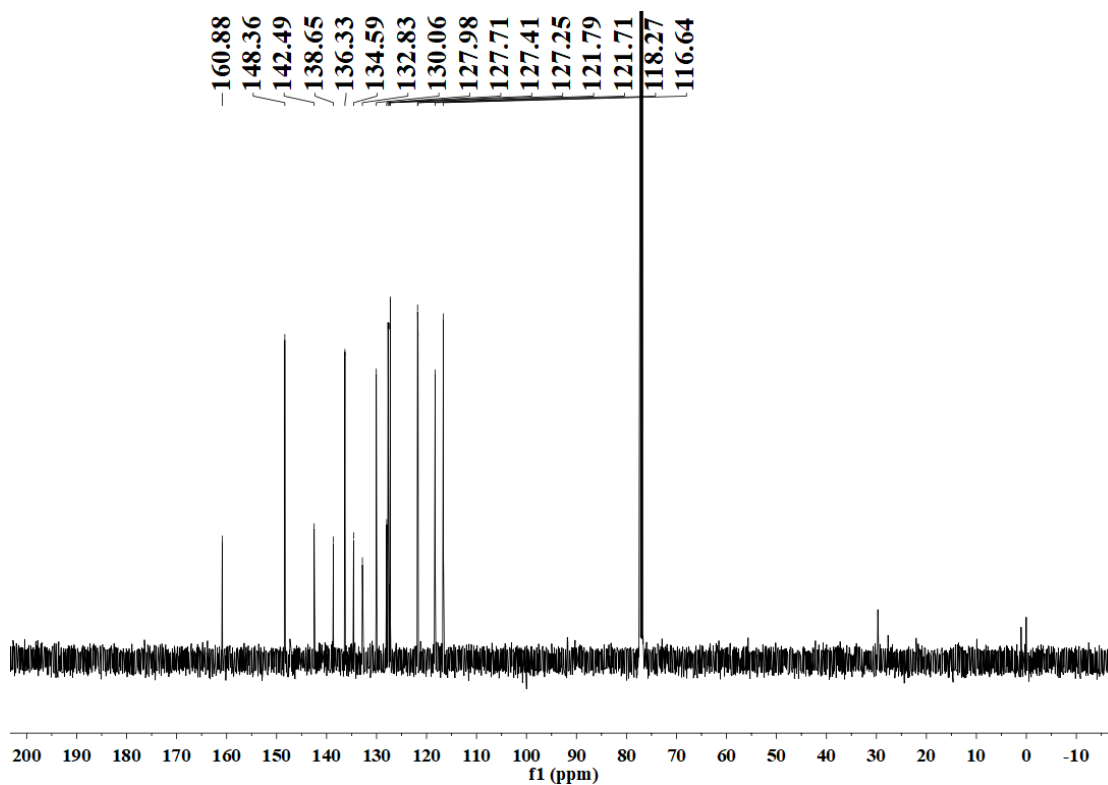

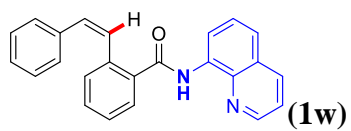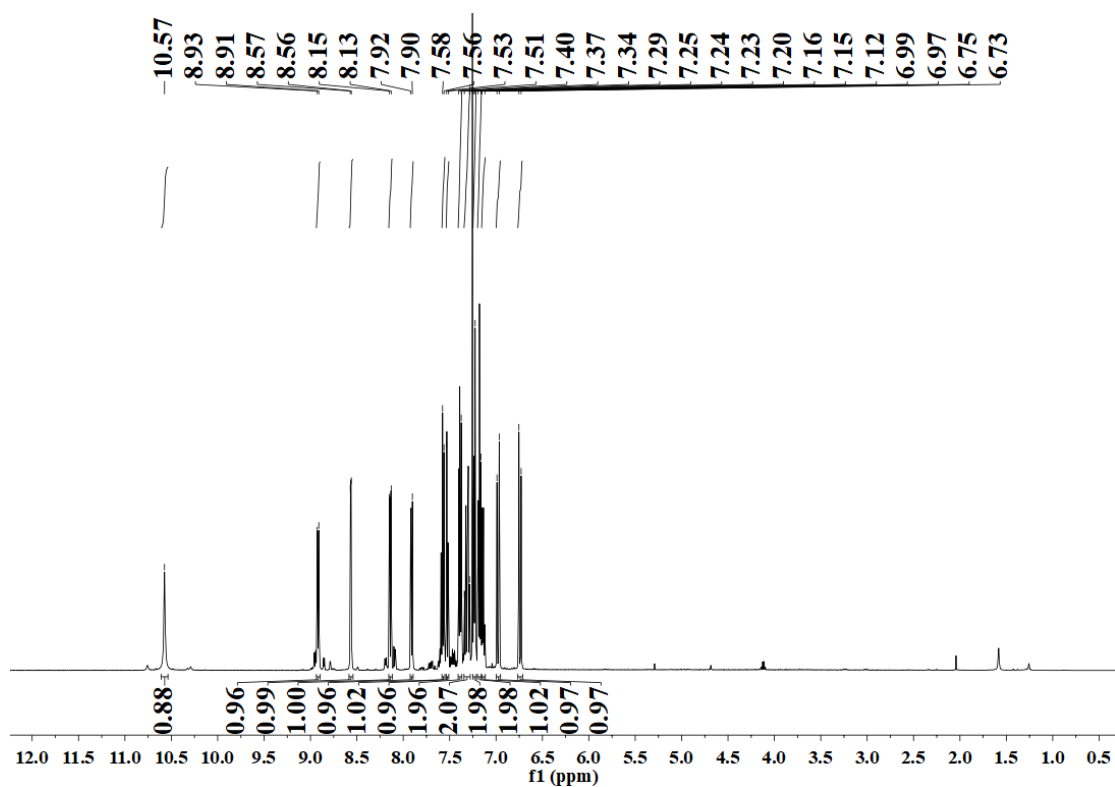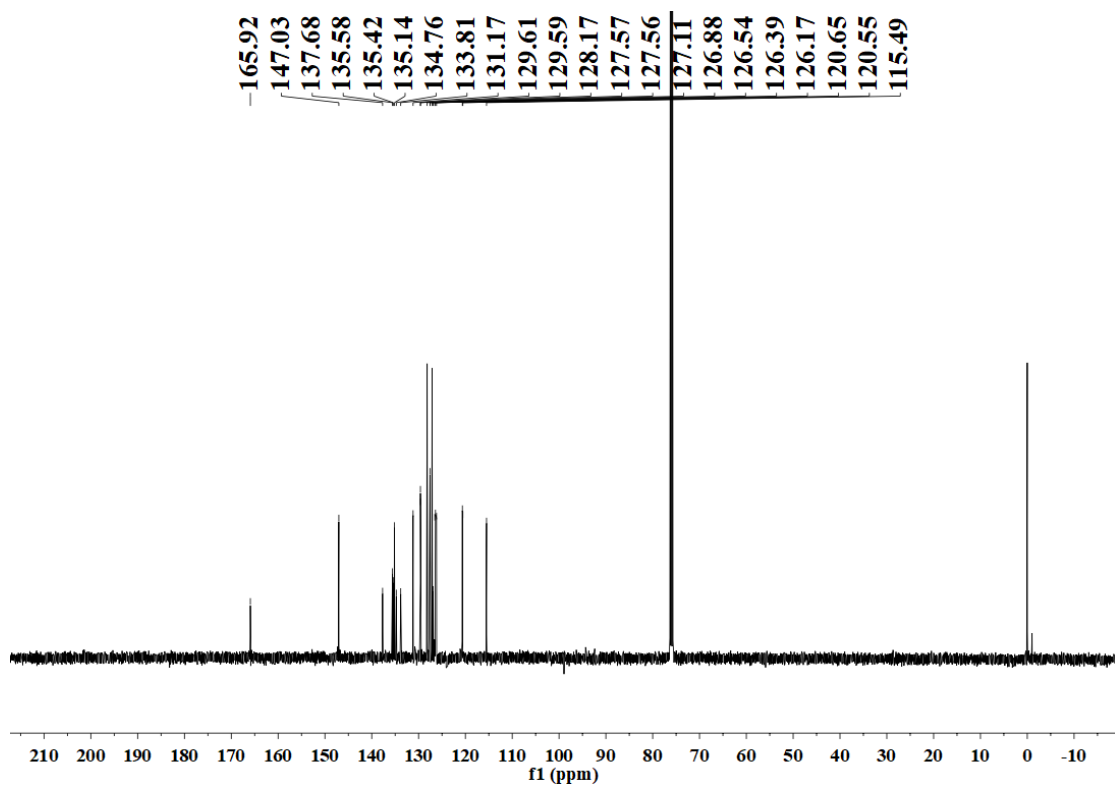

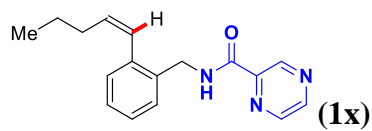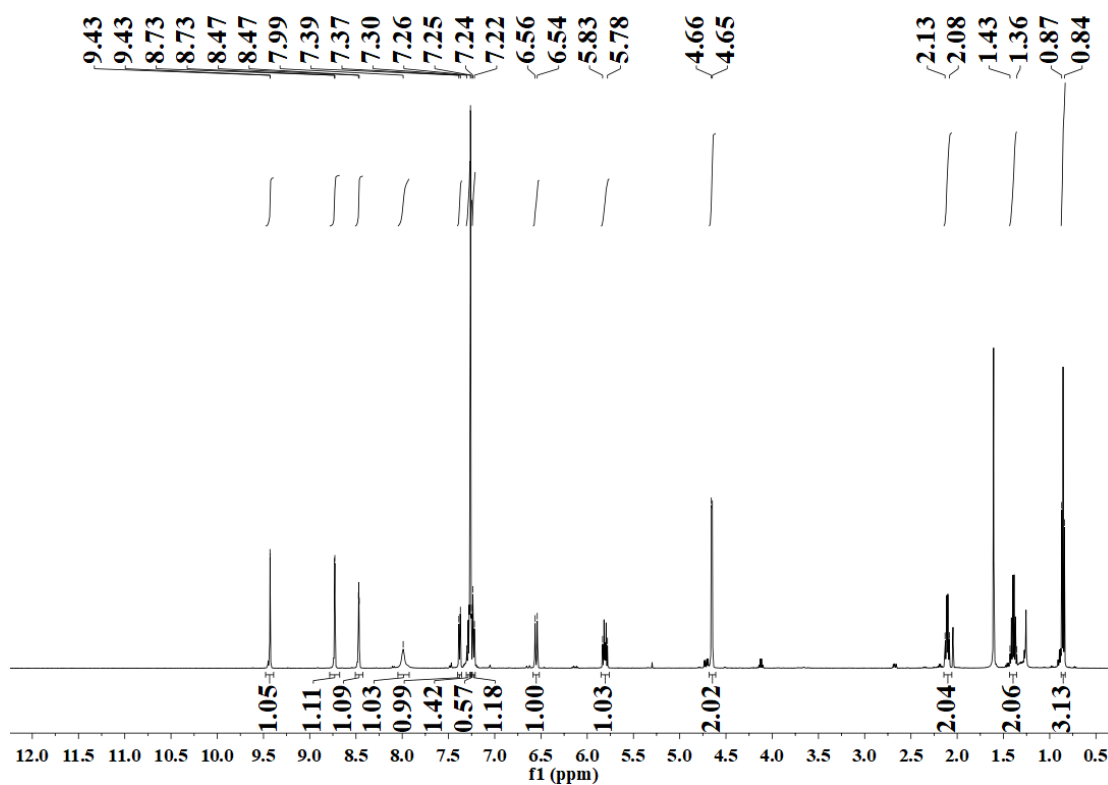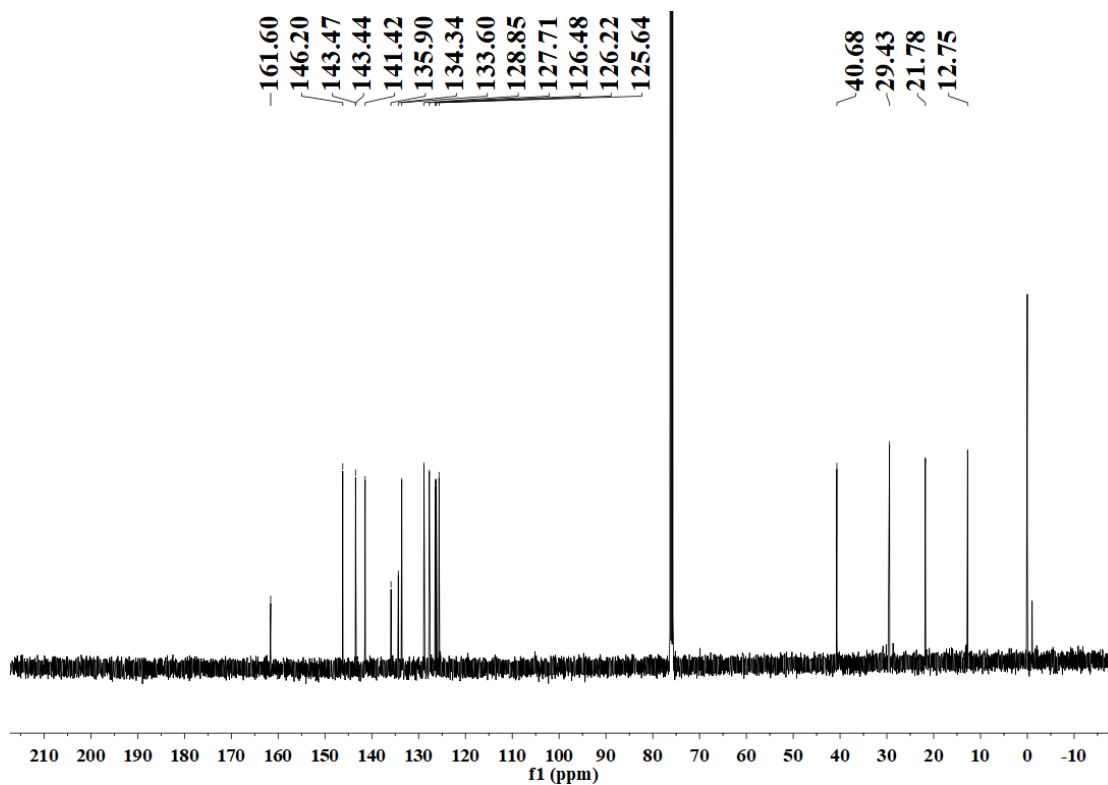

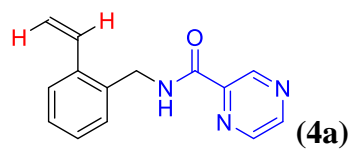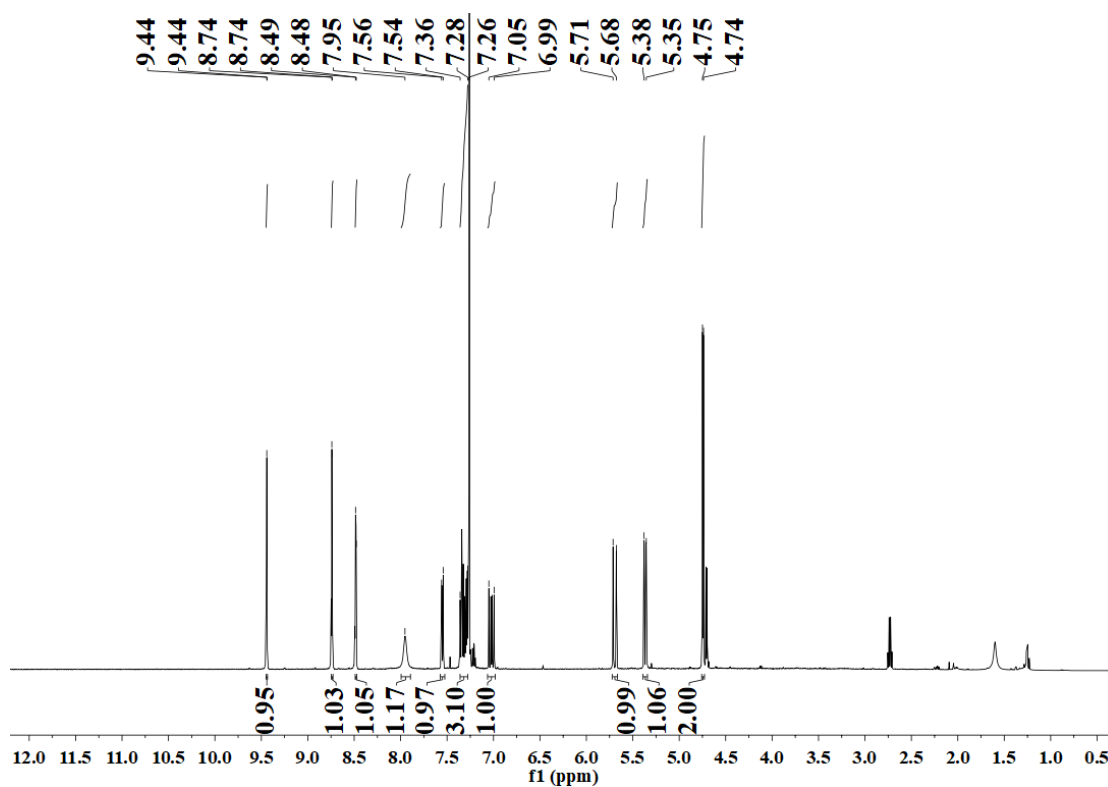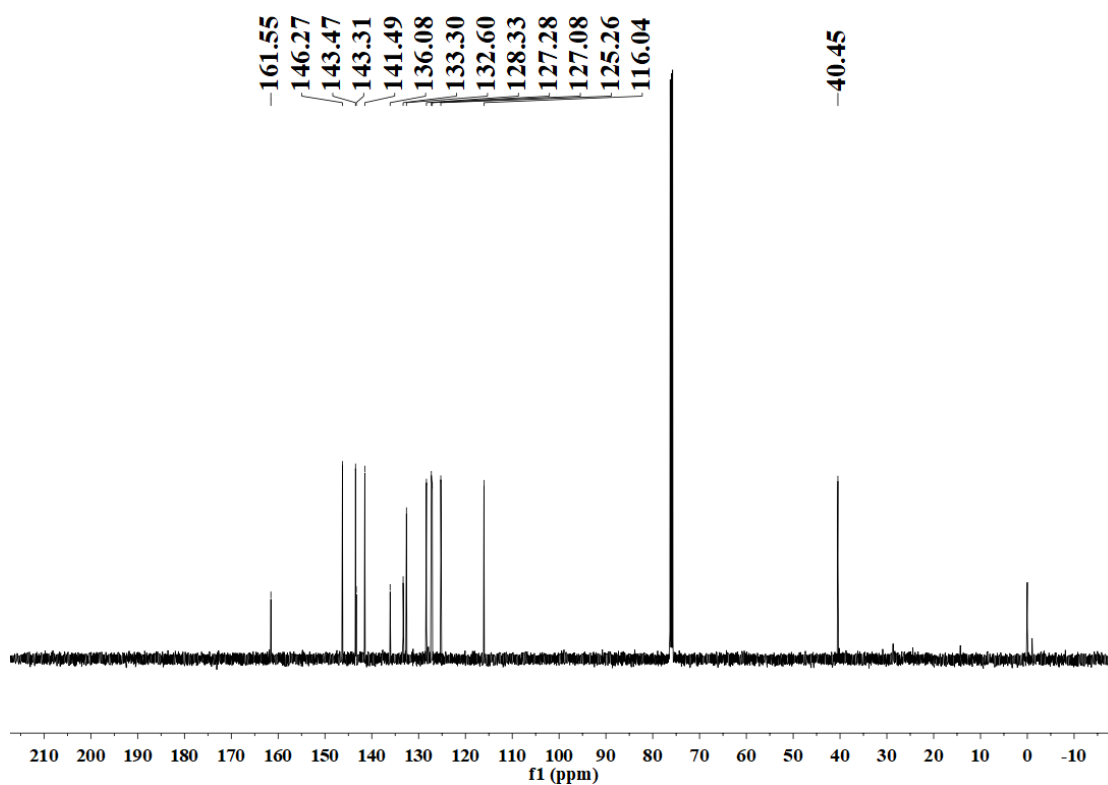

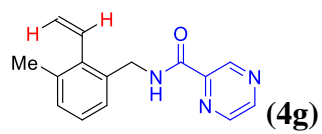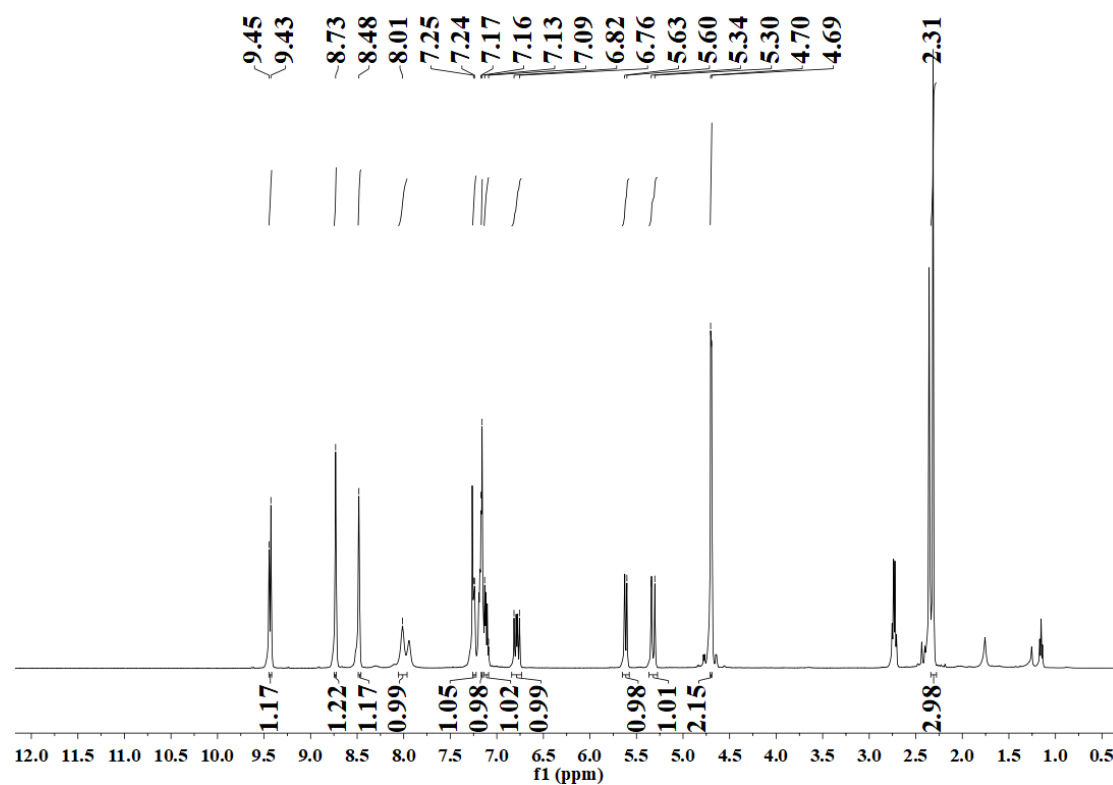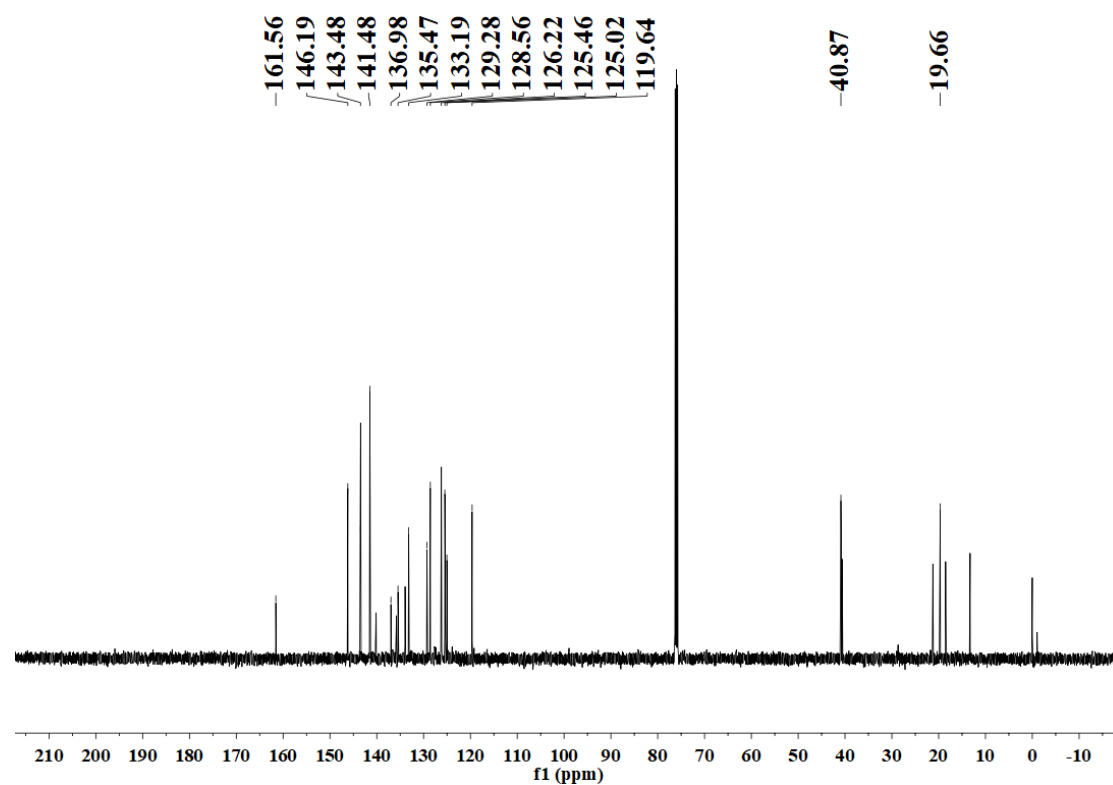

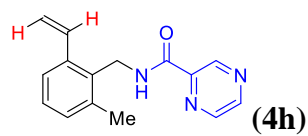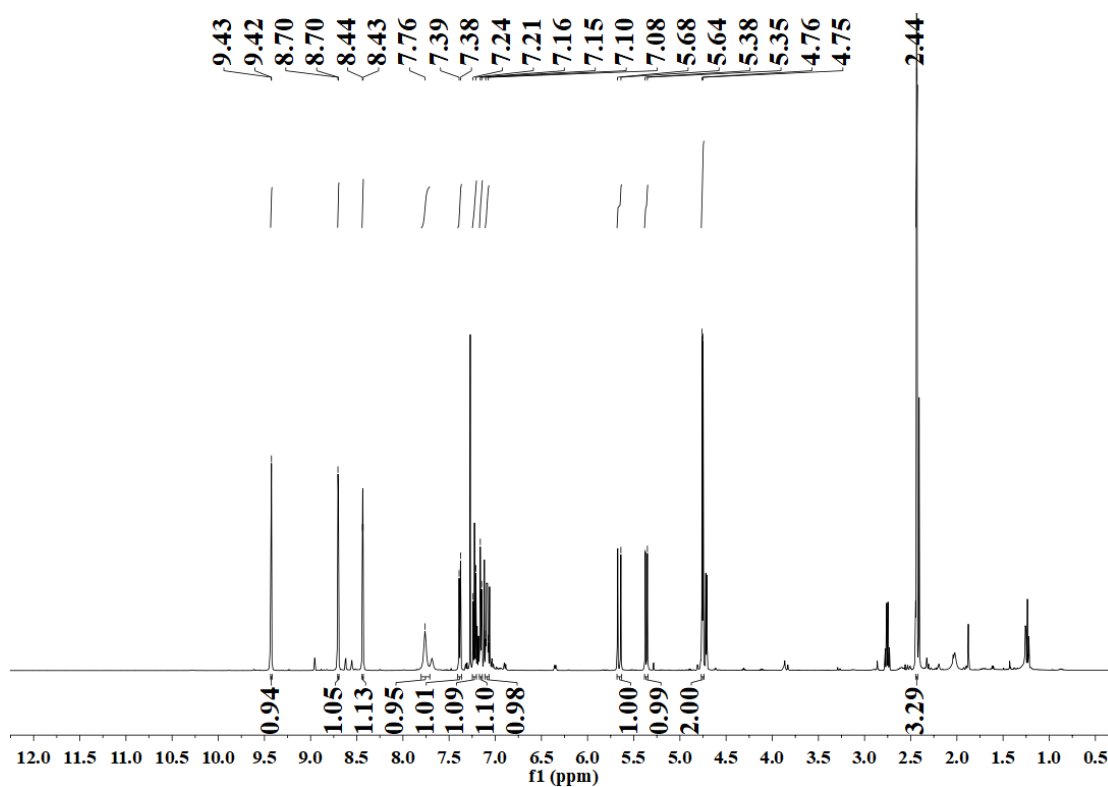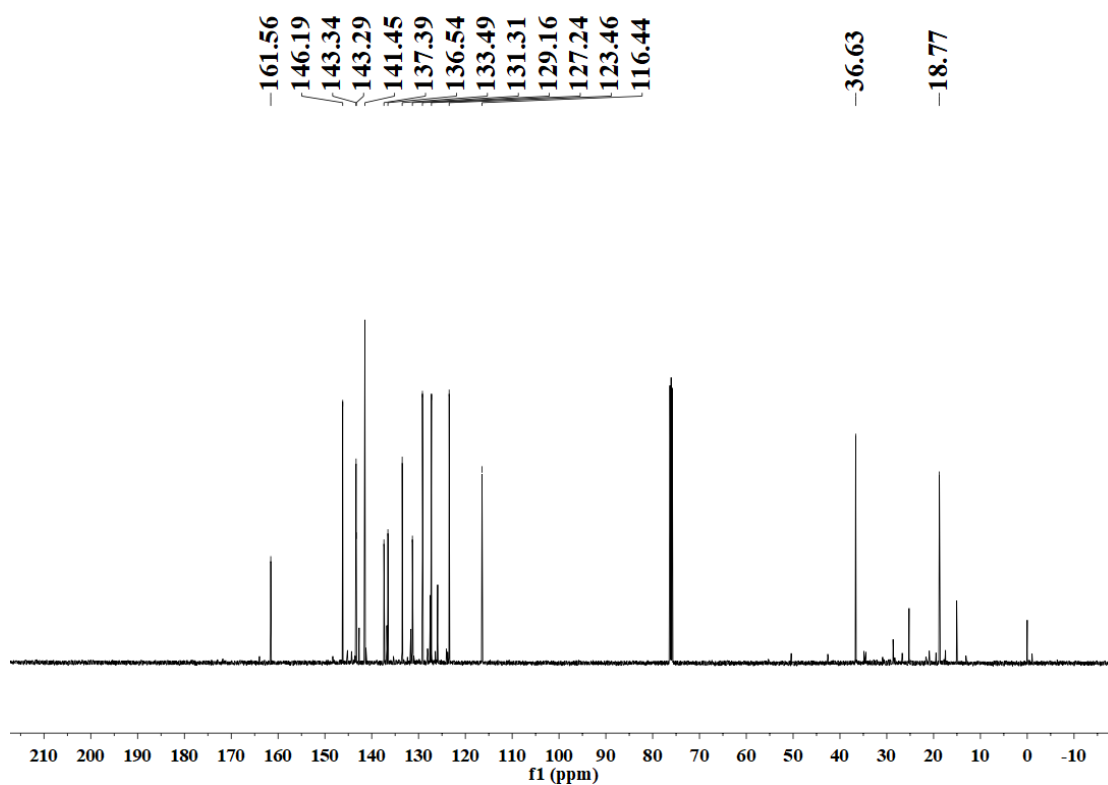

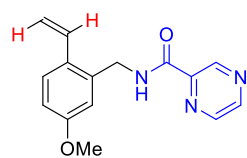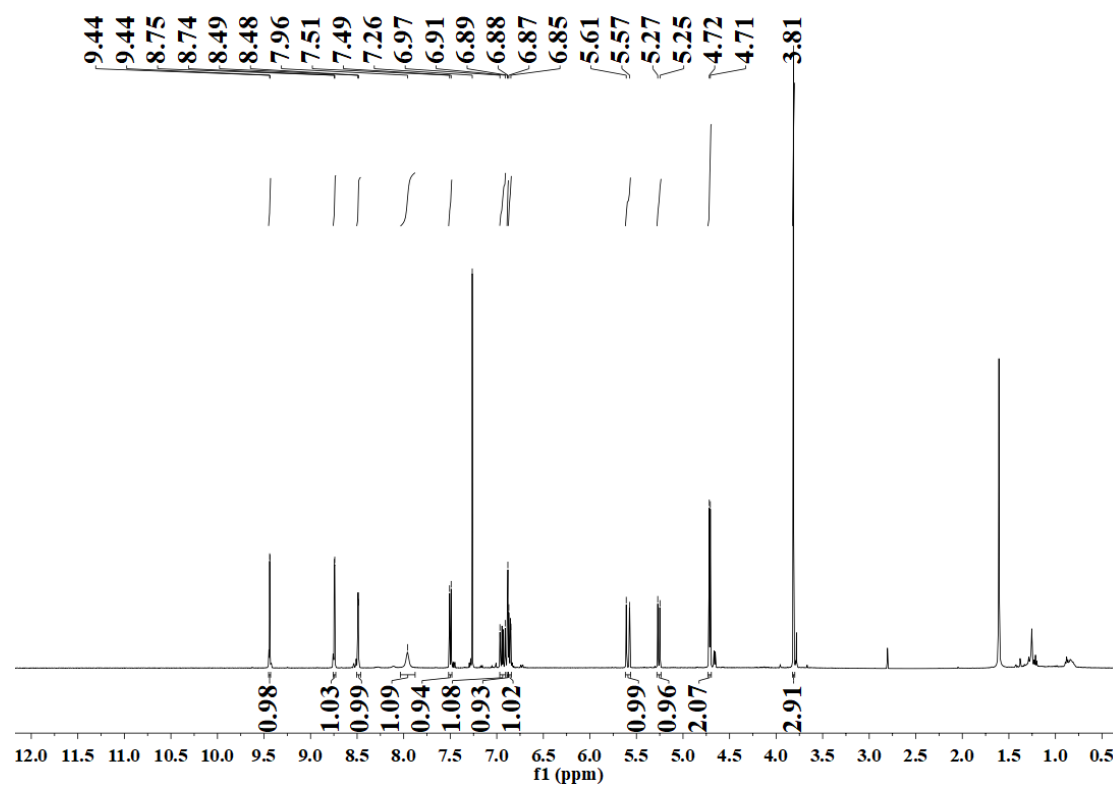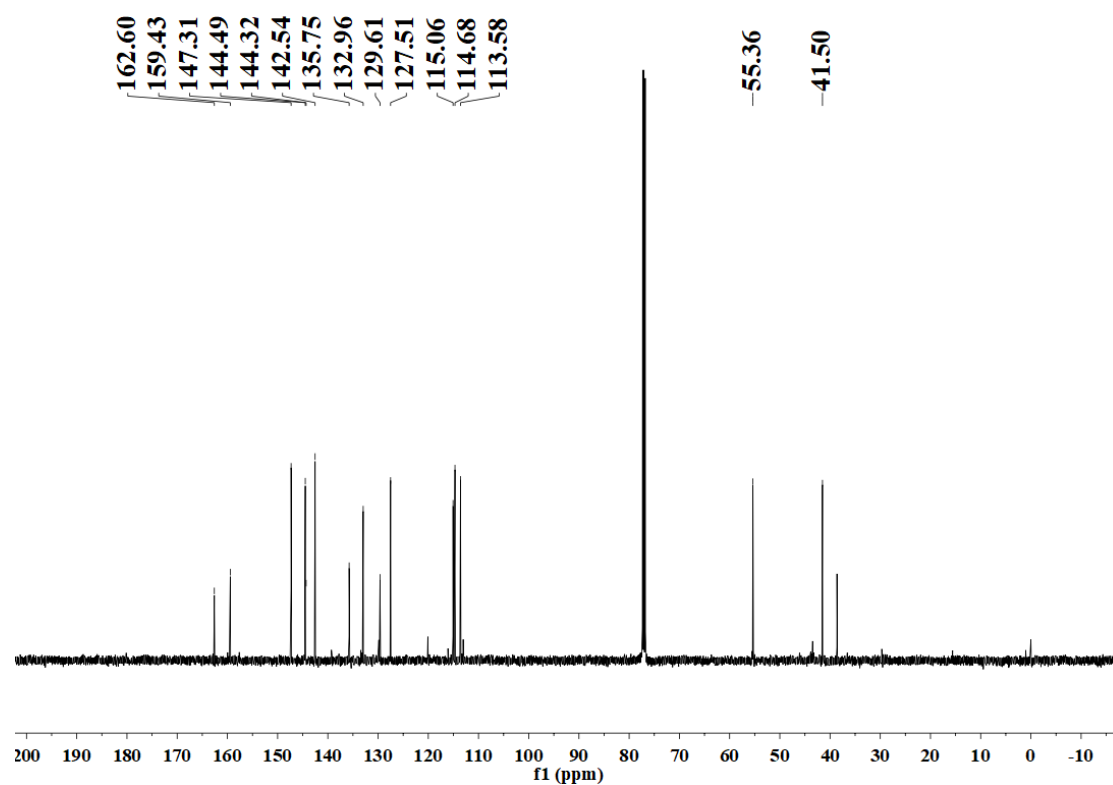

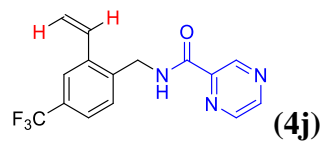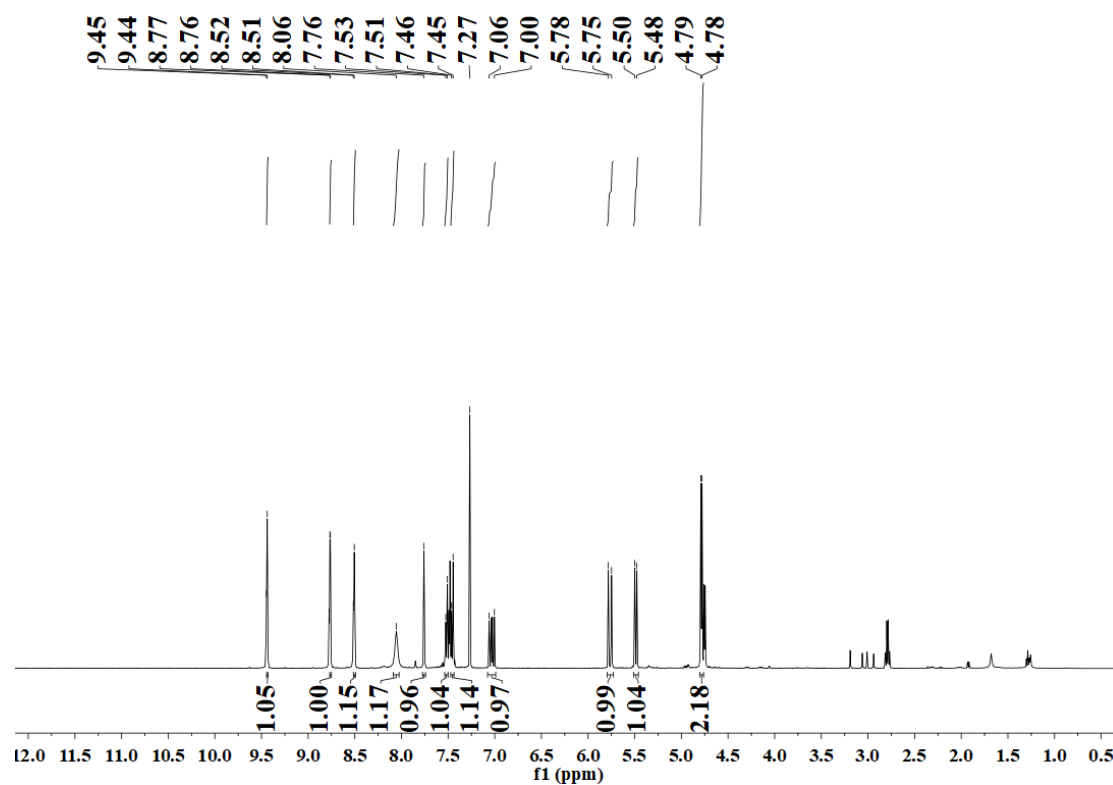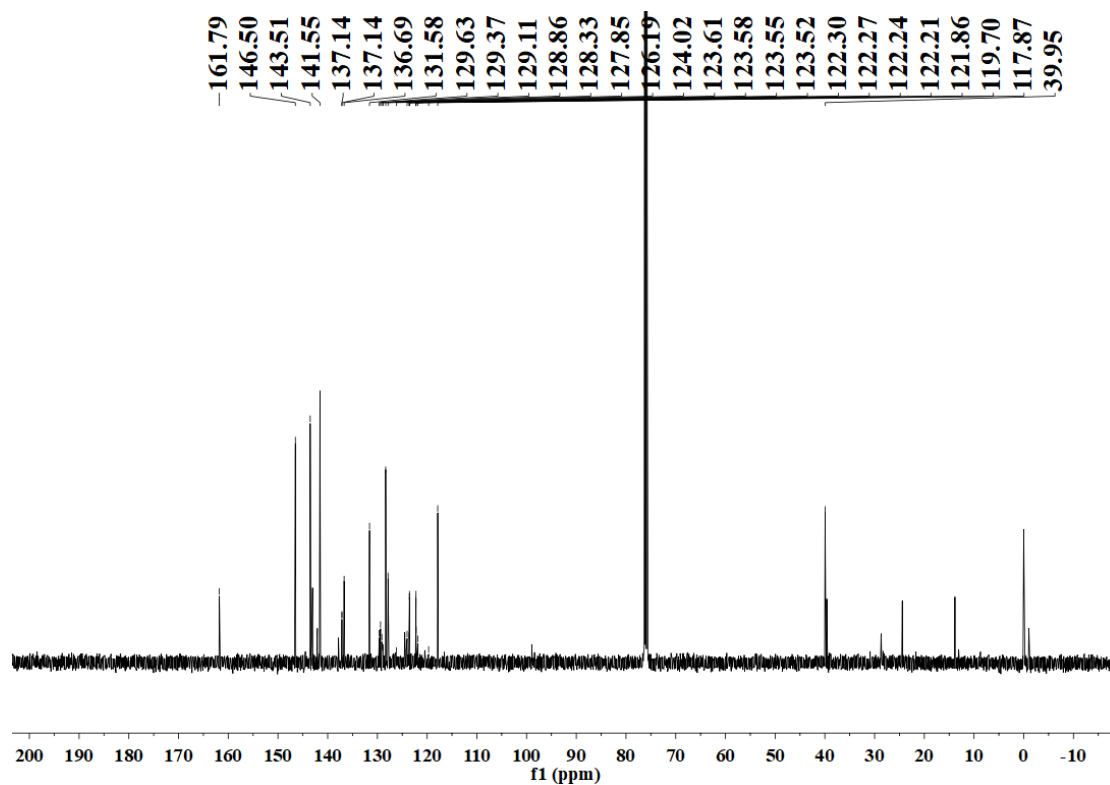



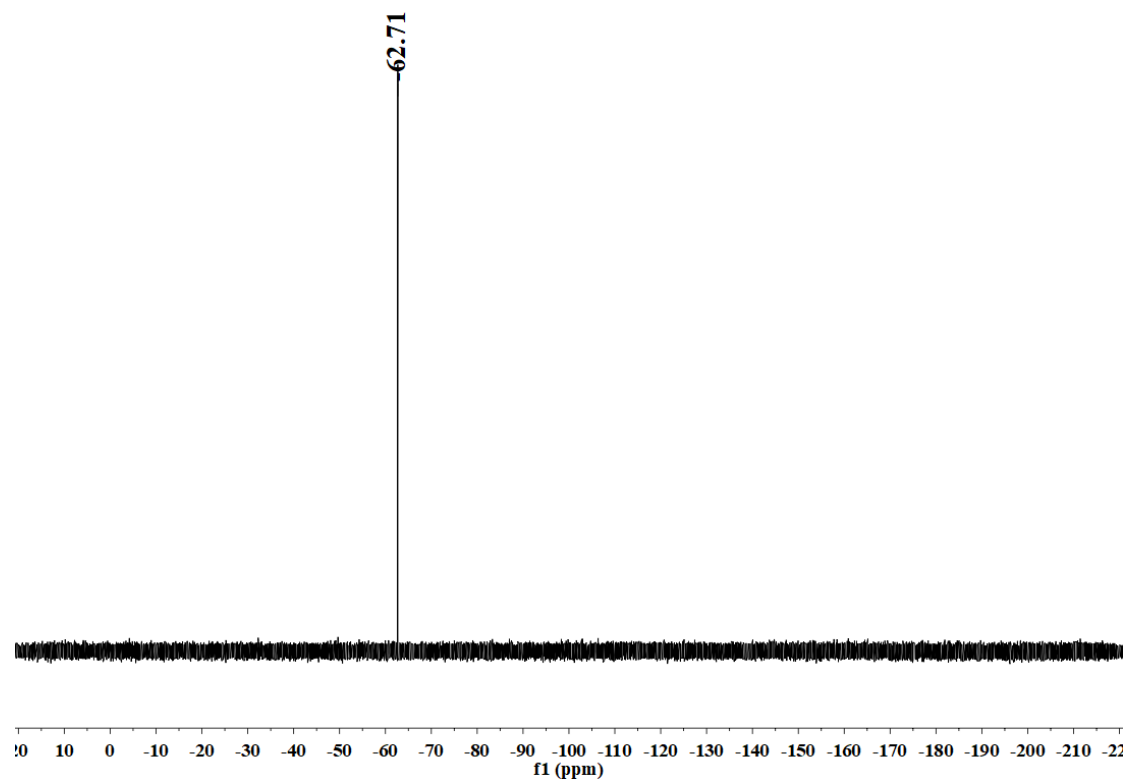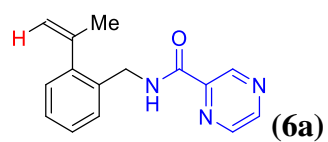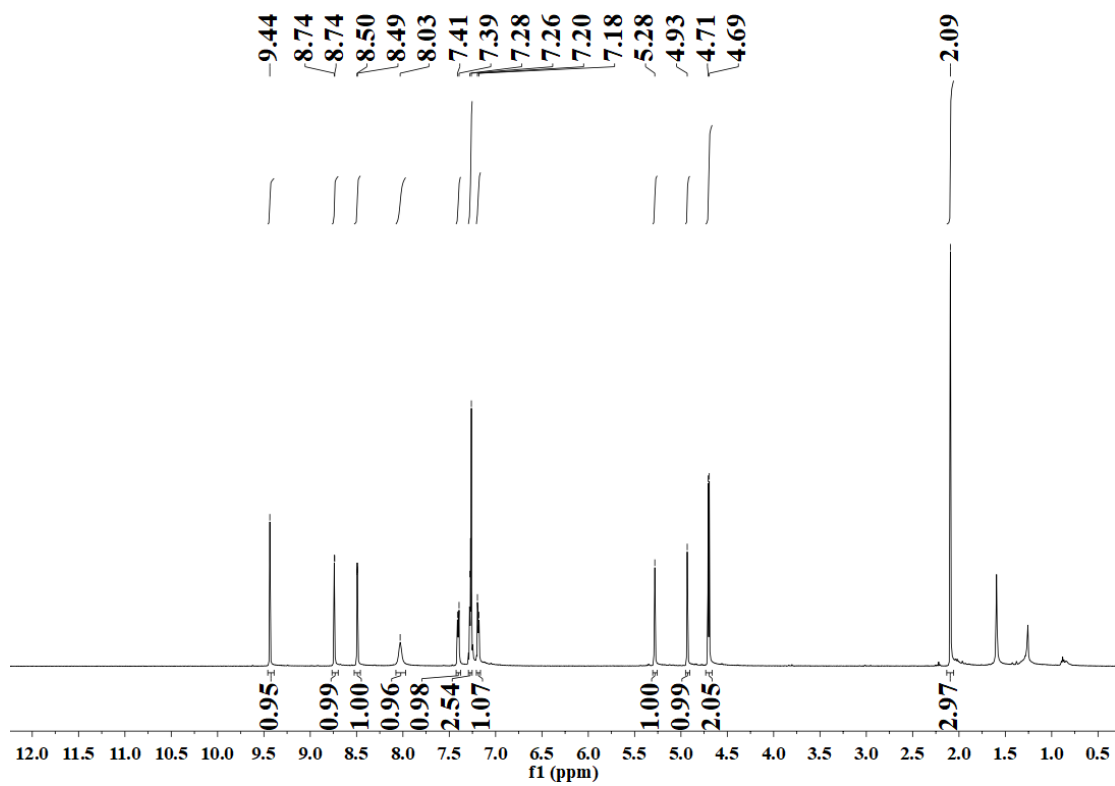

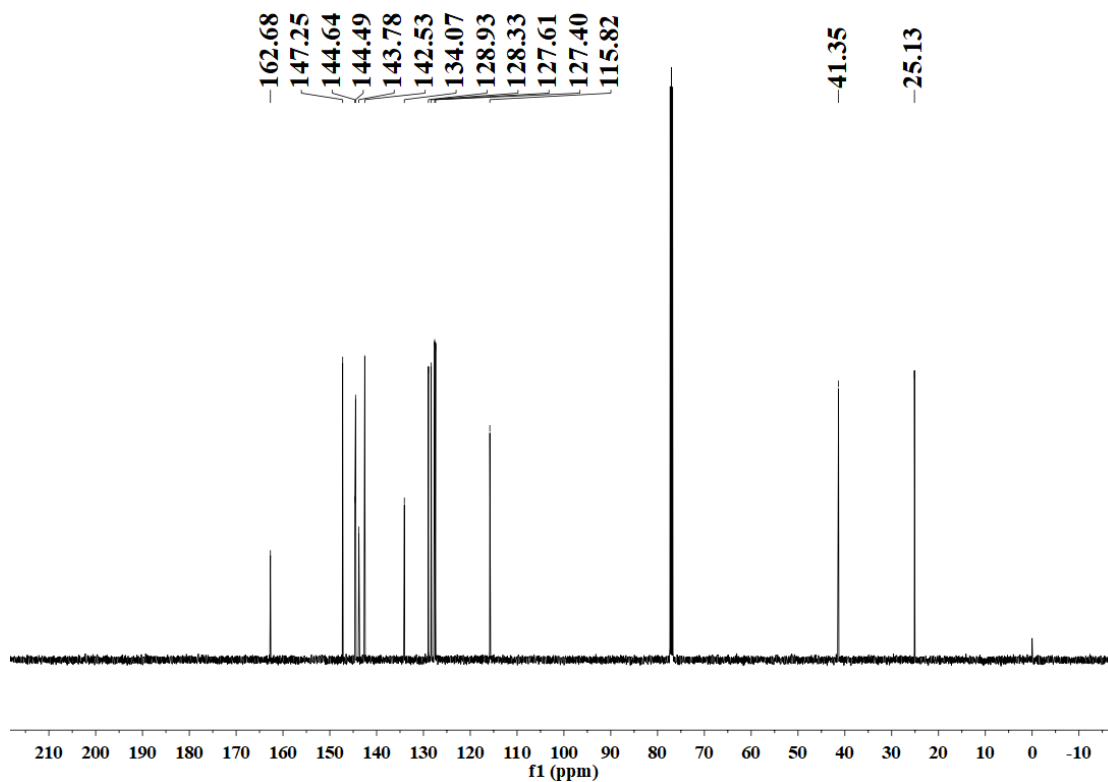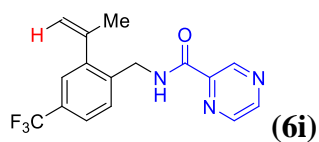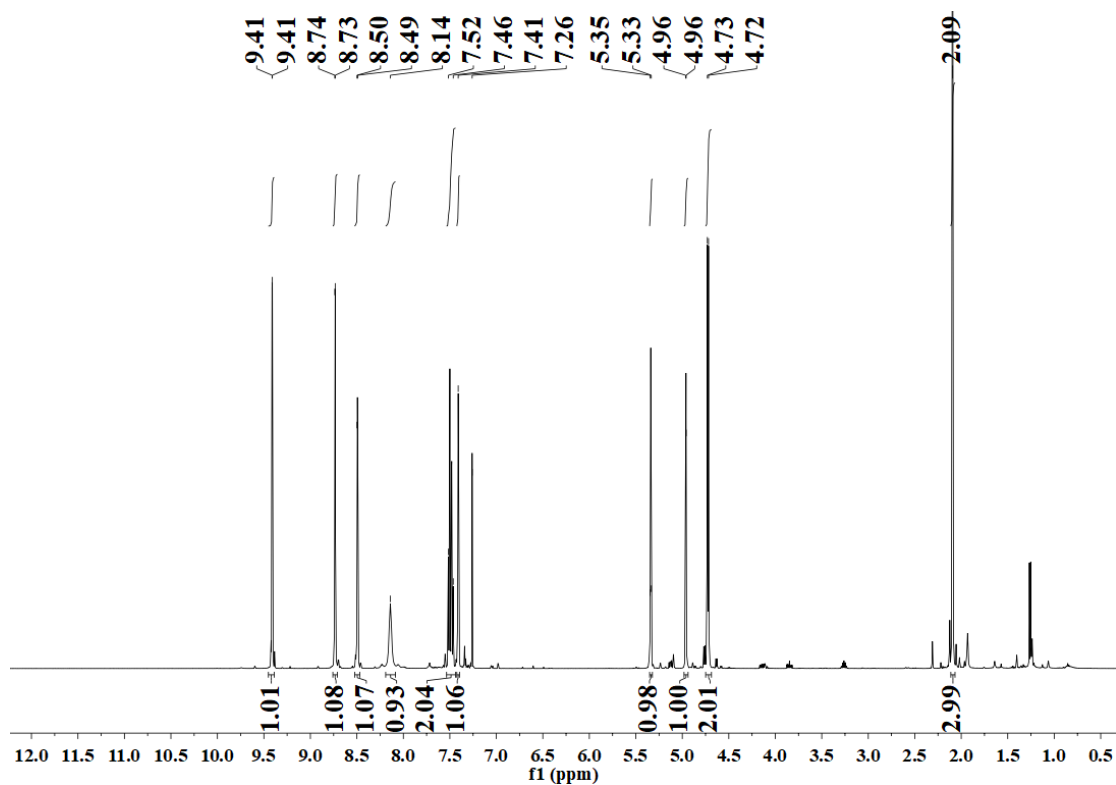

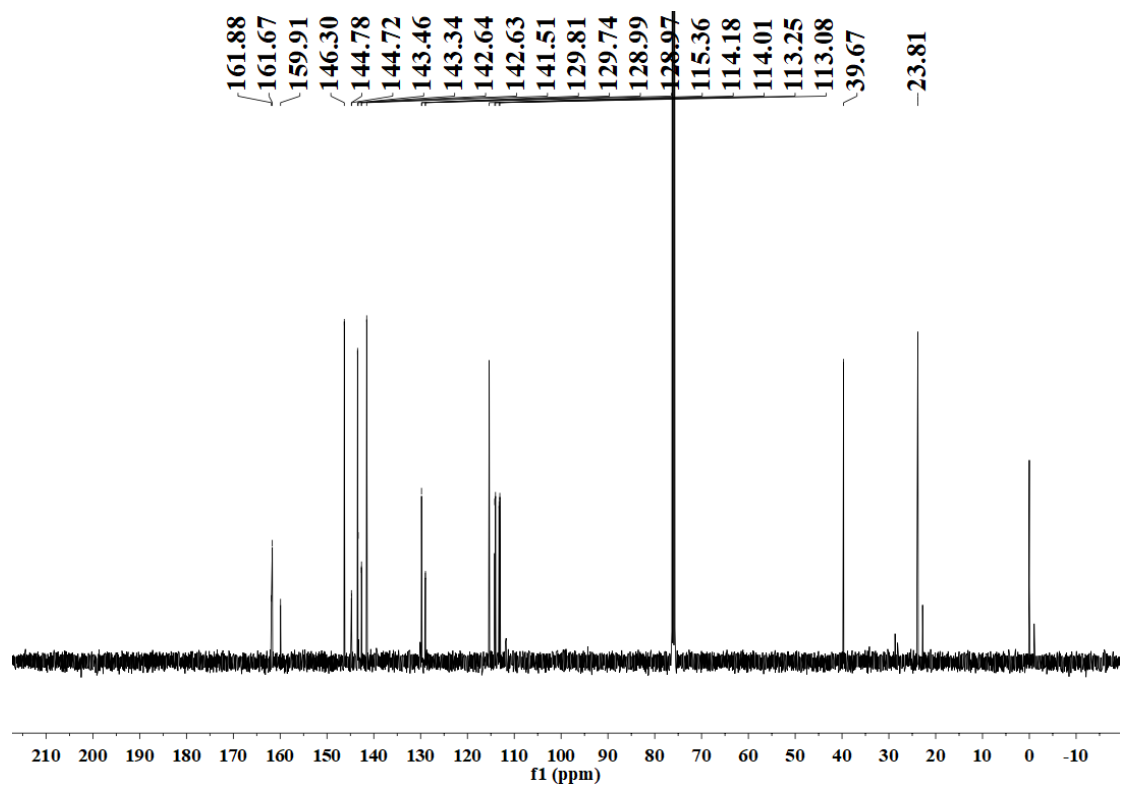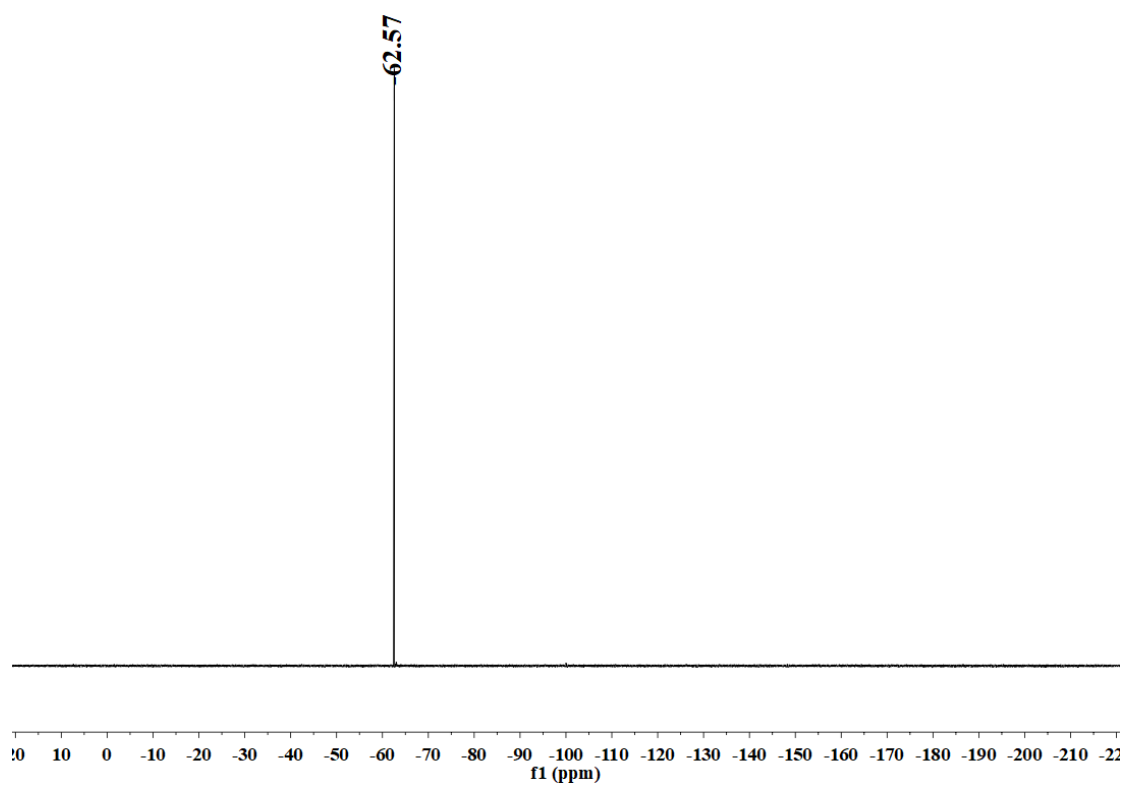

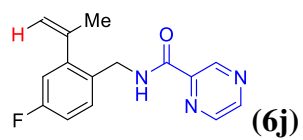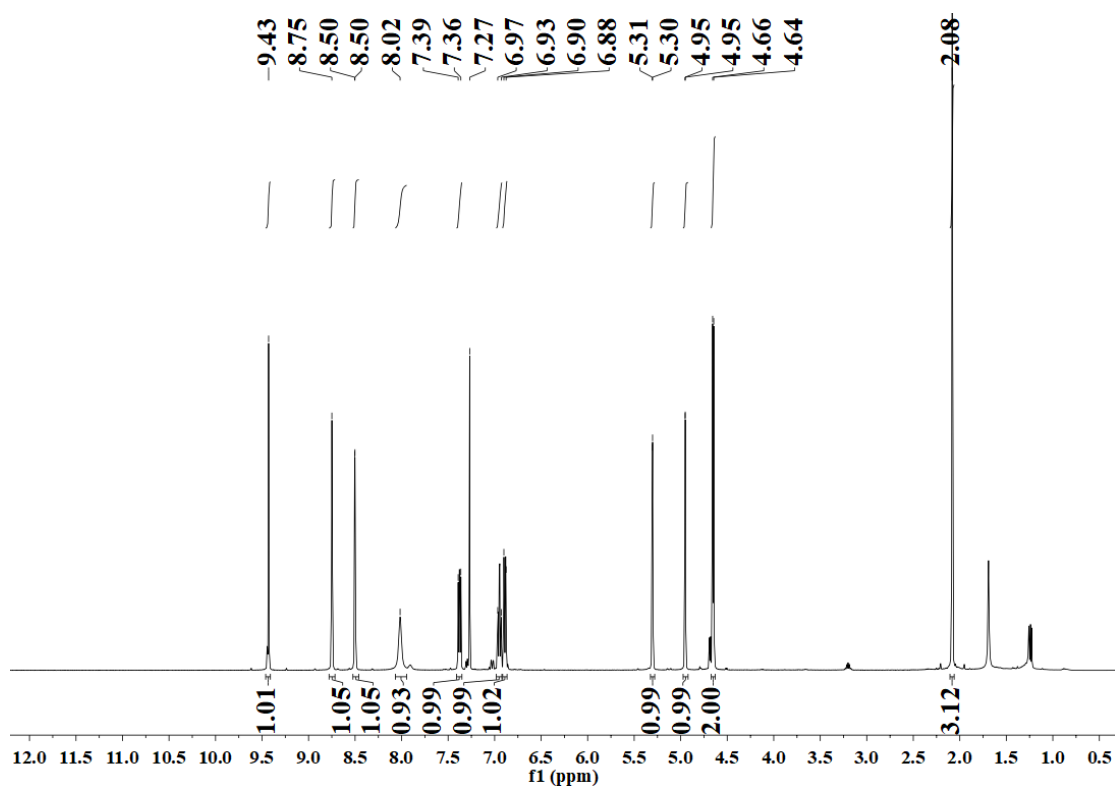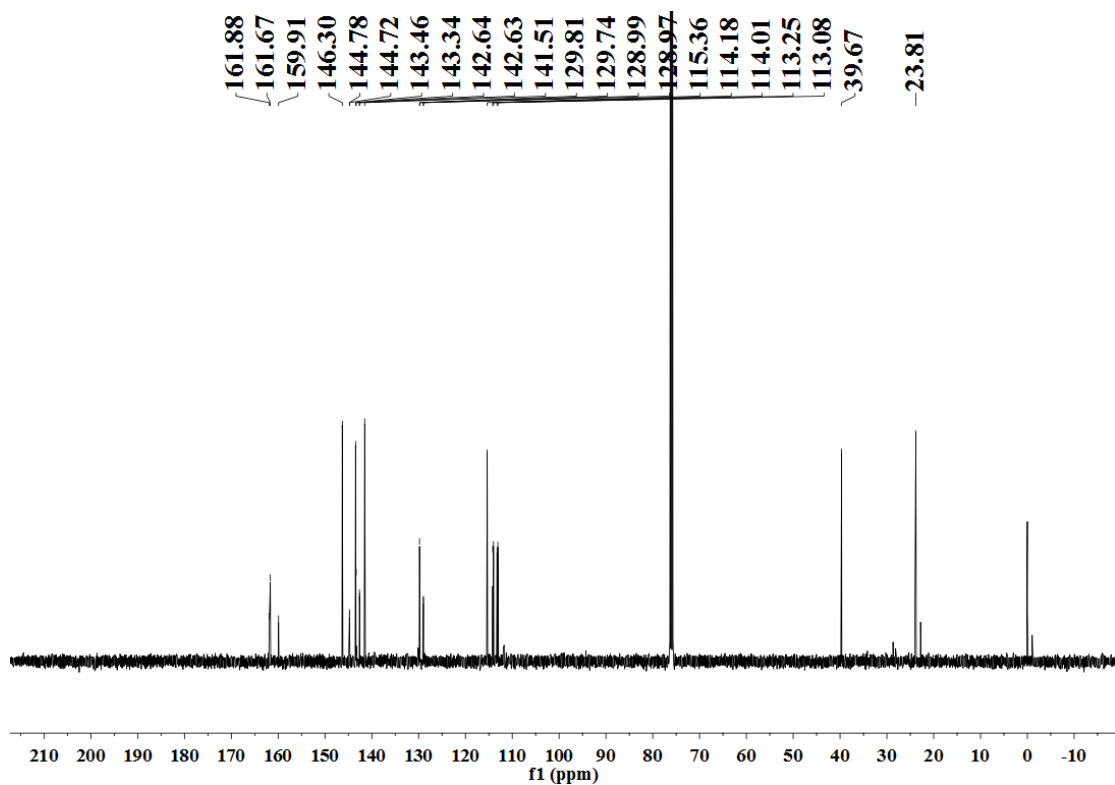

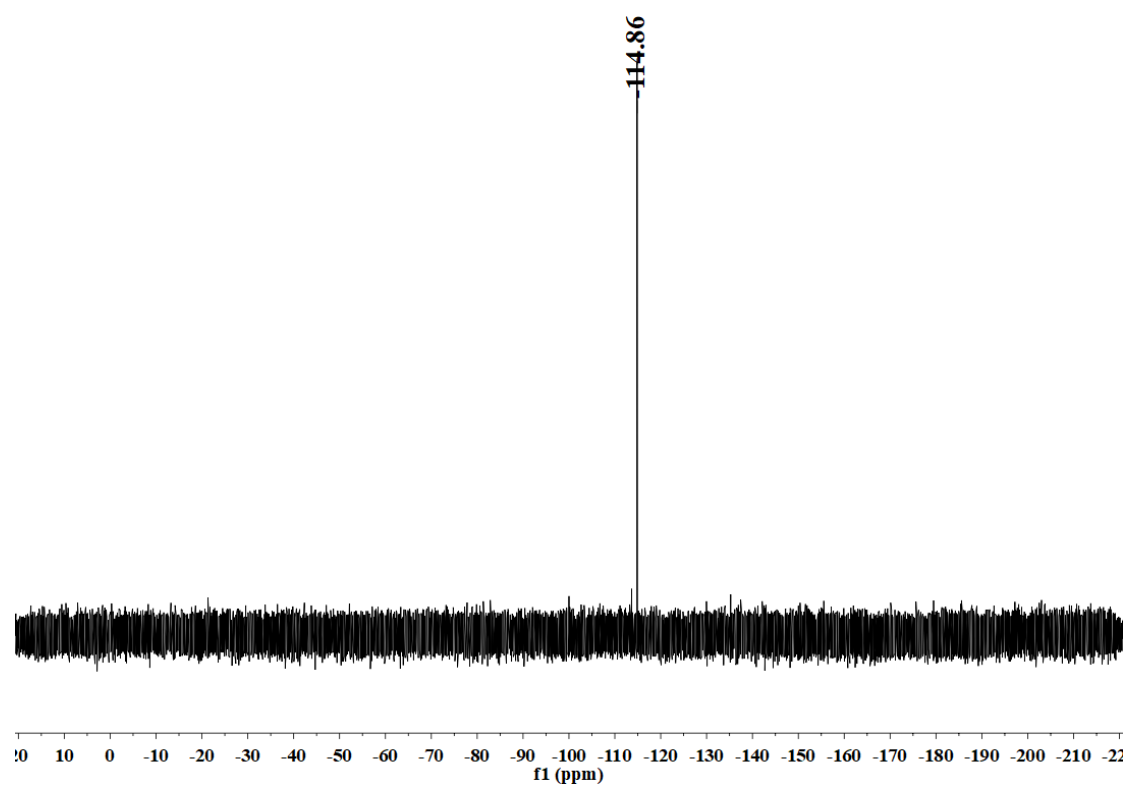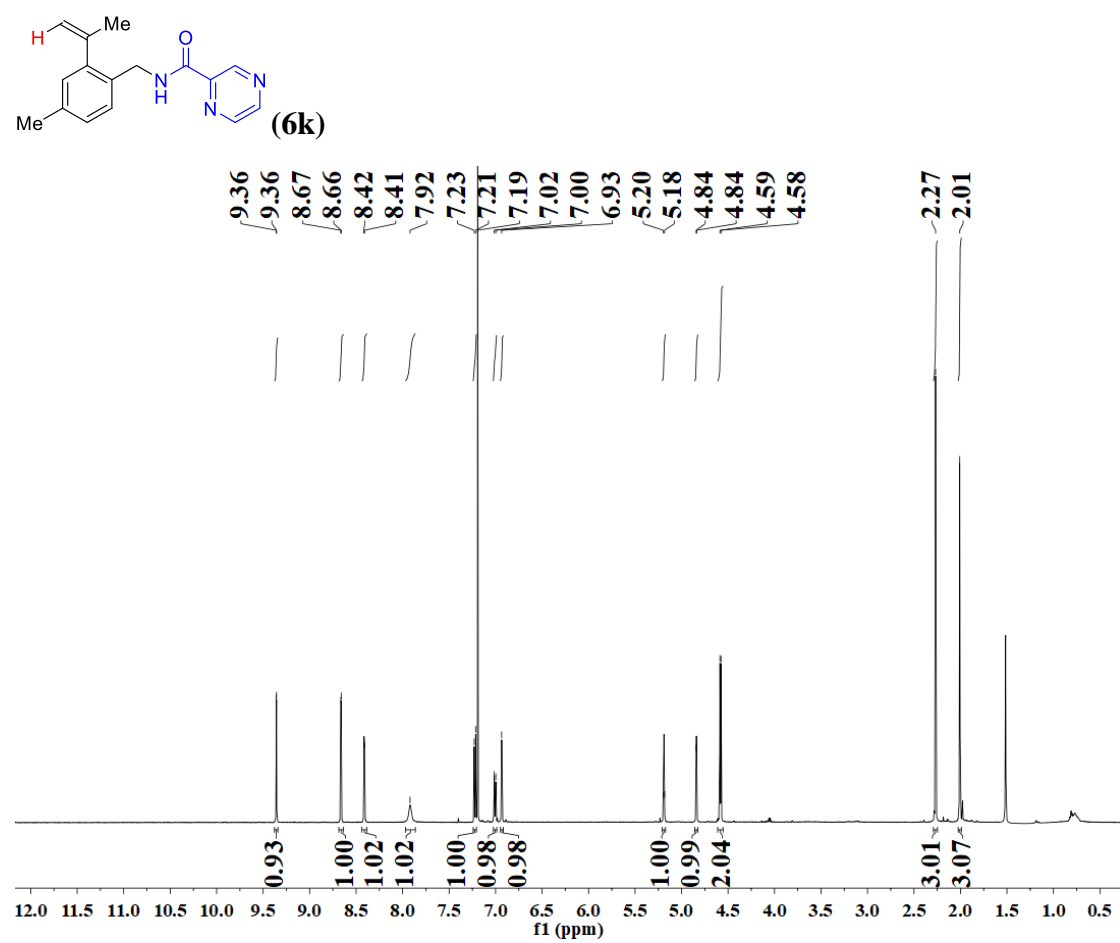

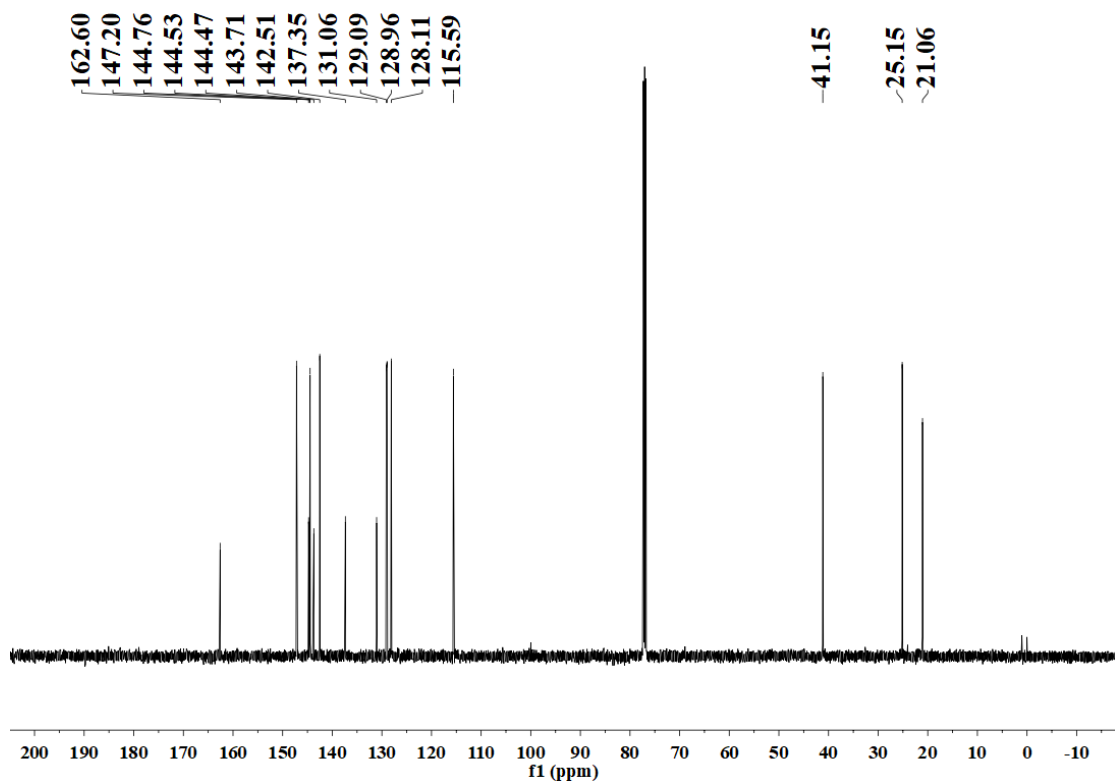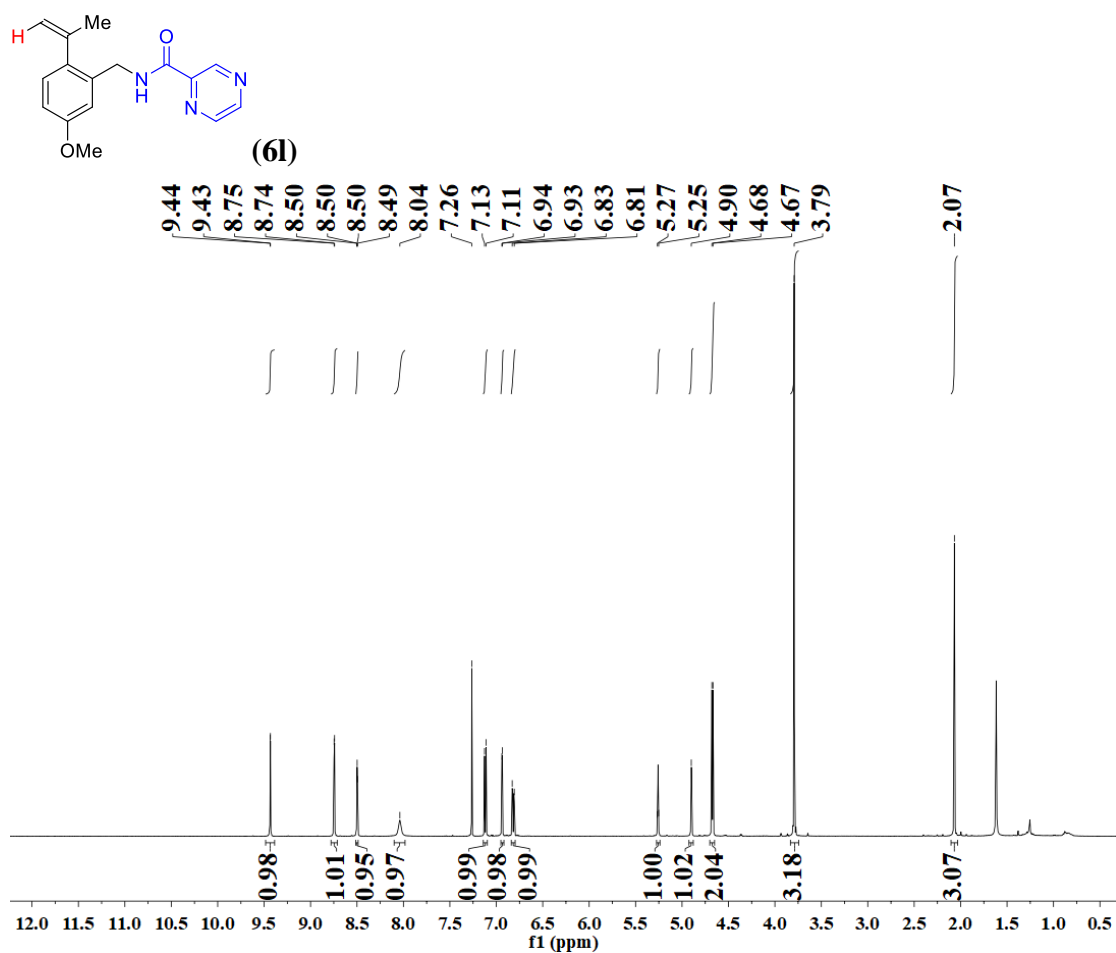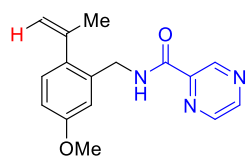

(6l)

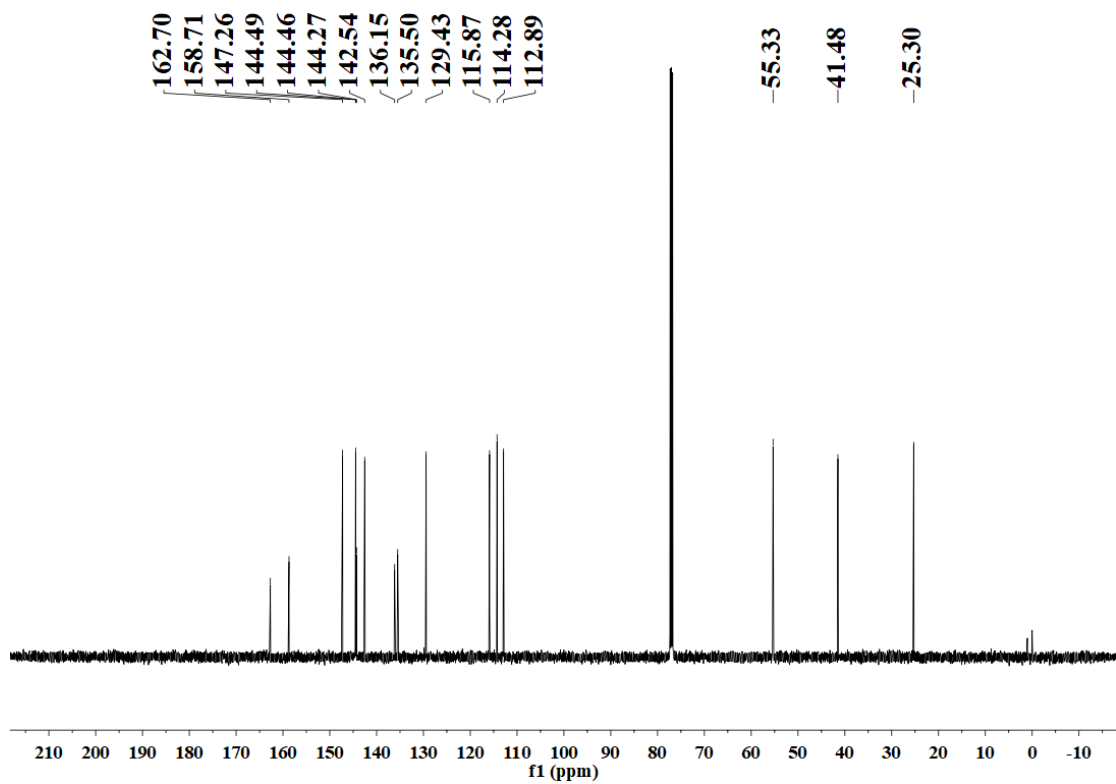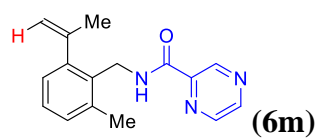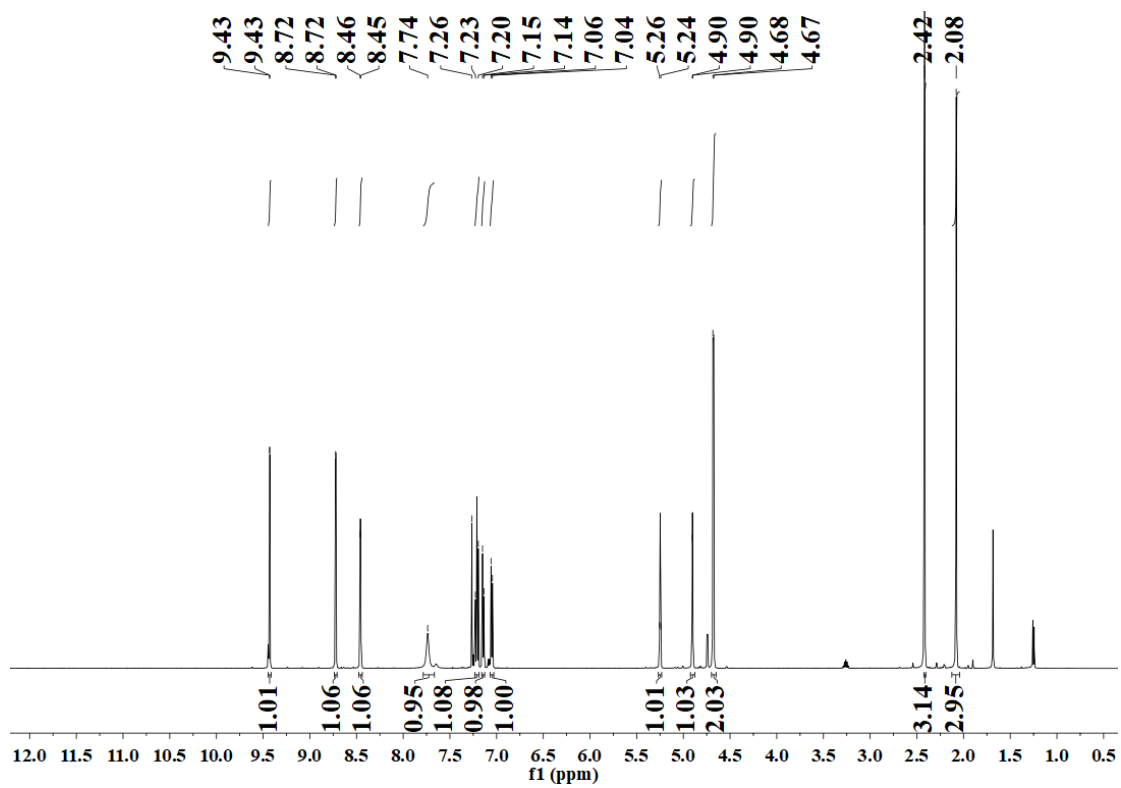

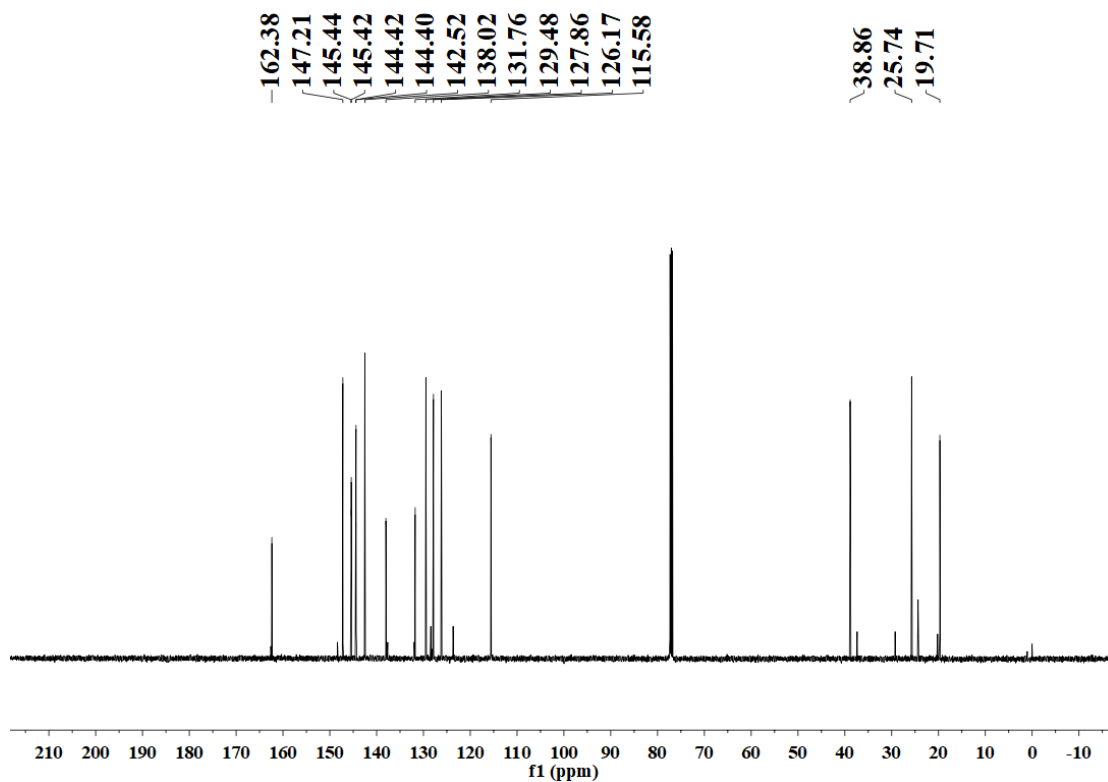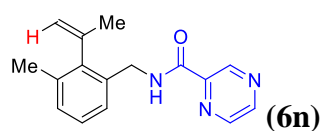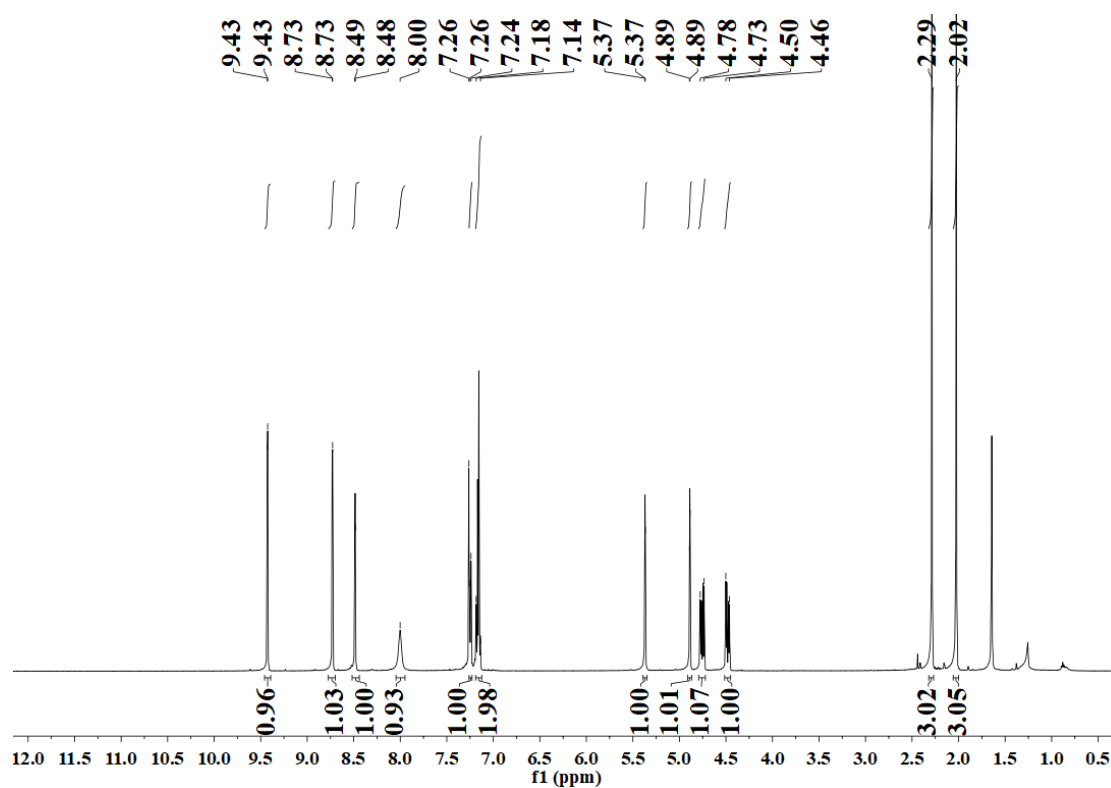



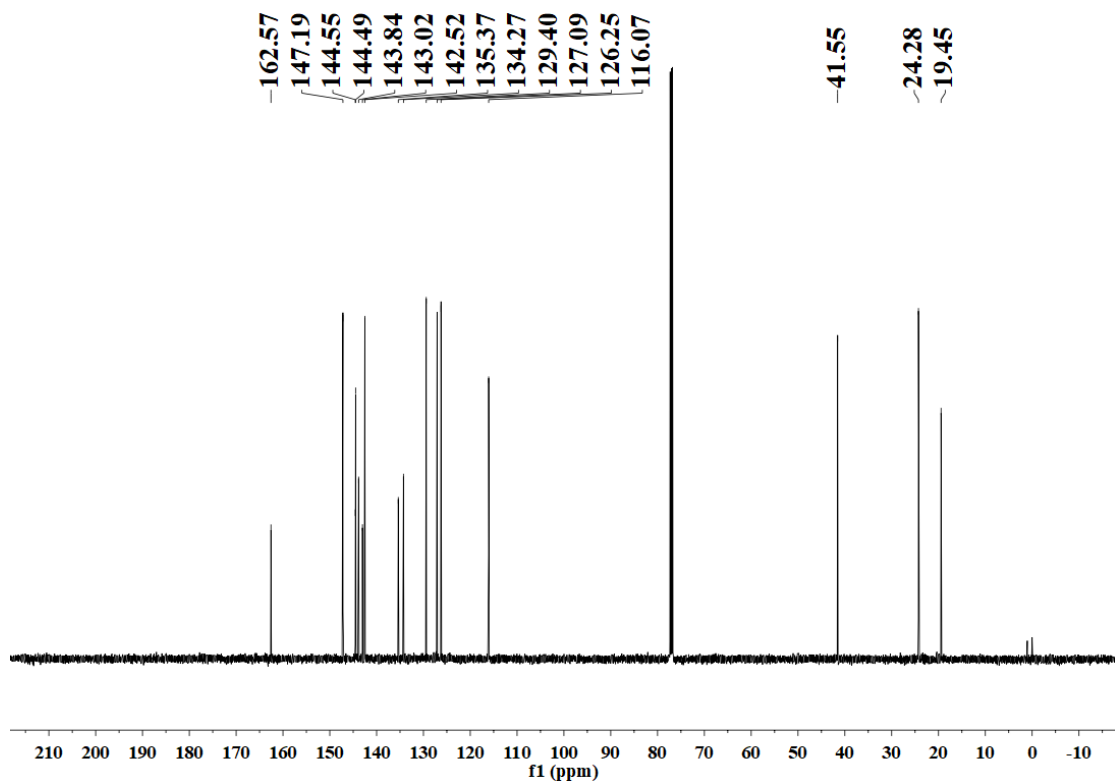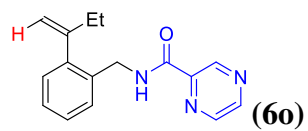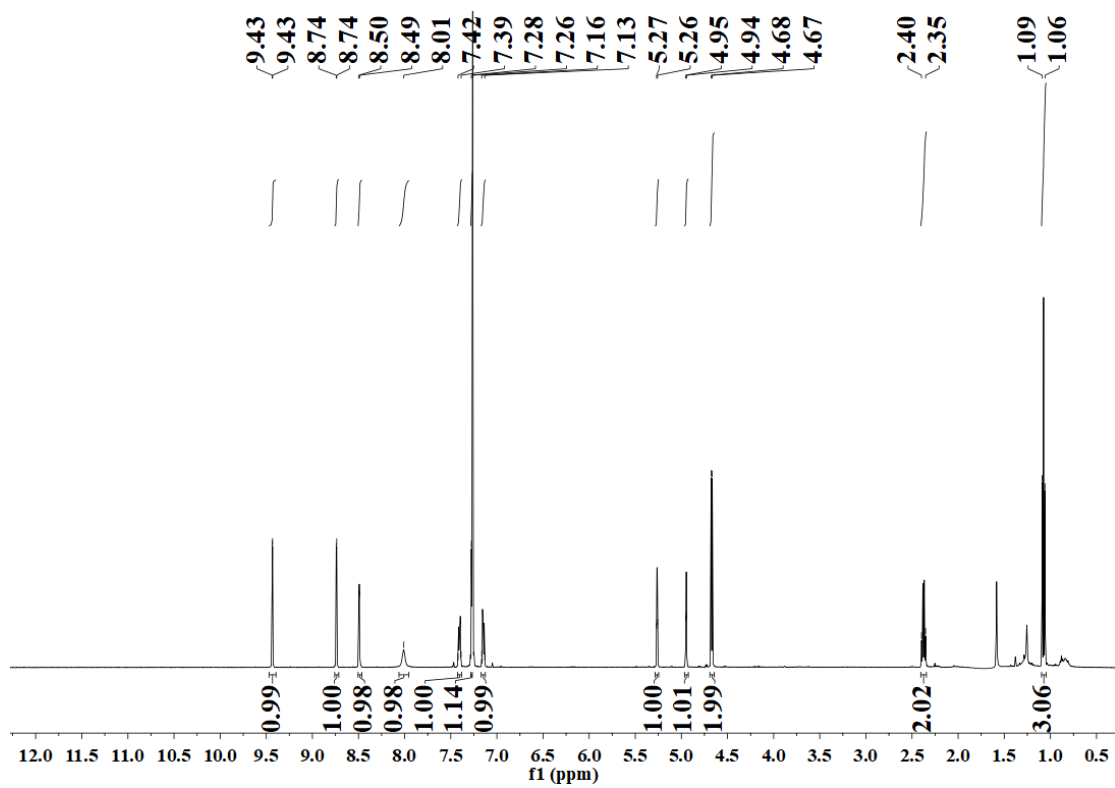

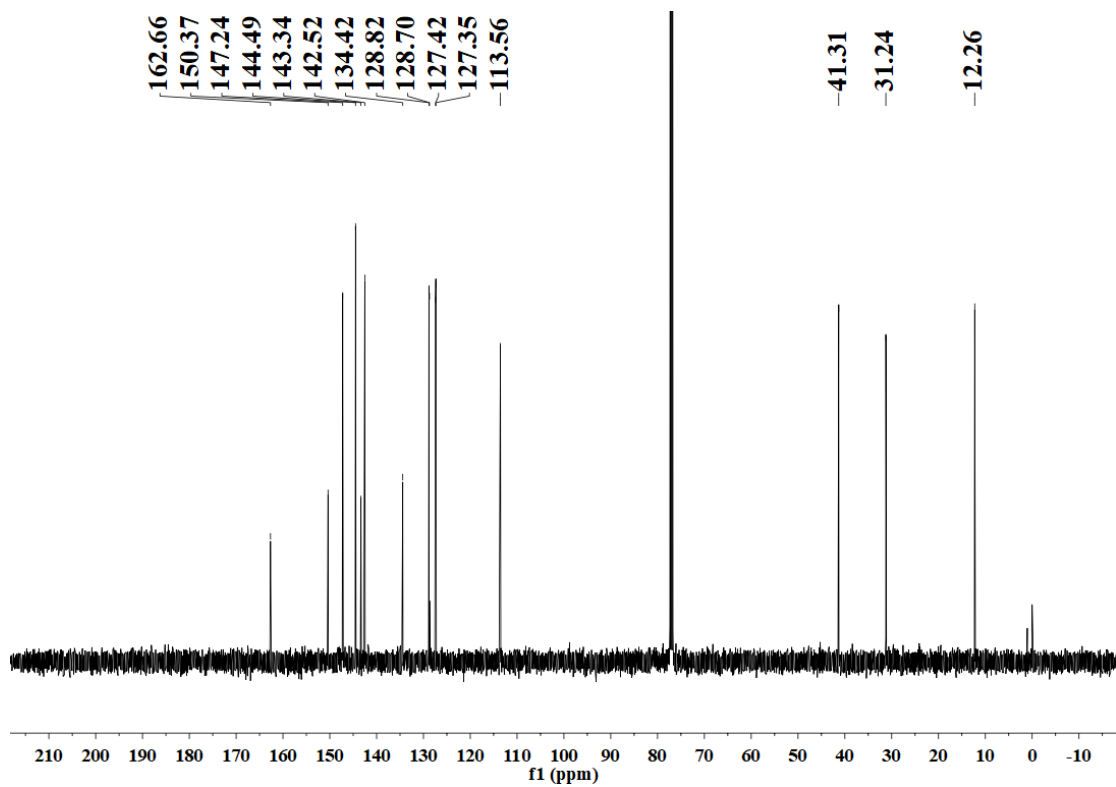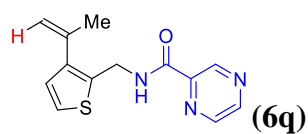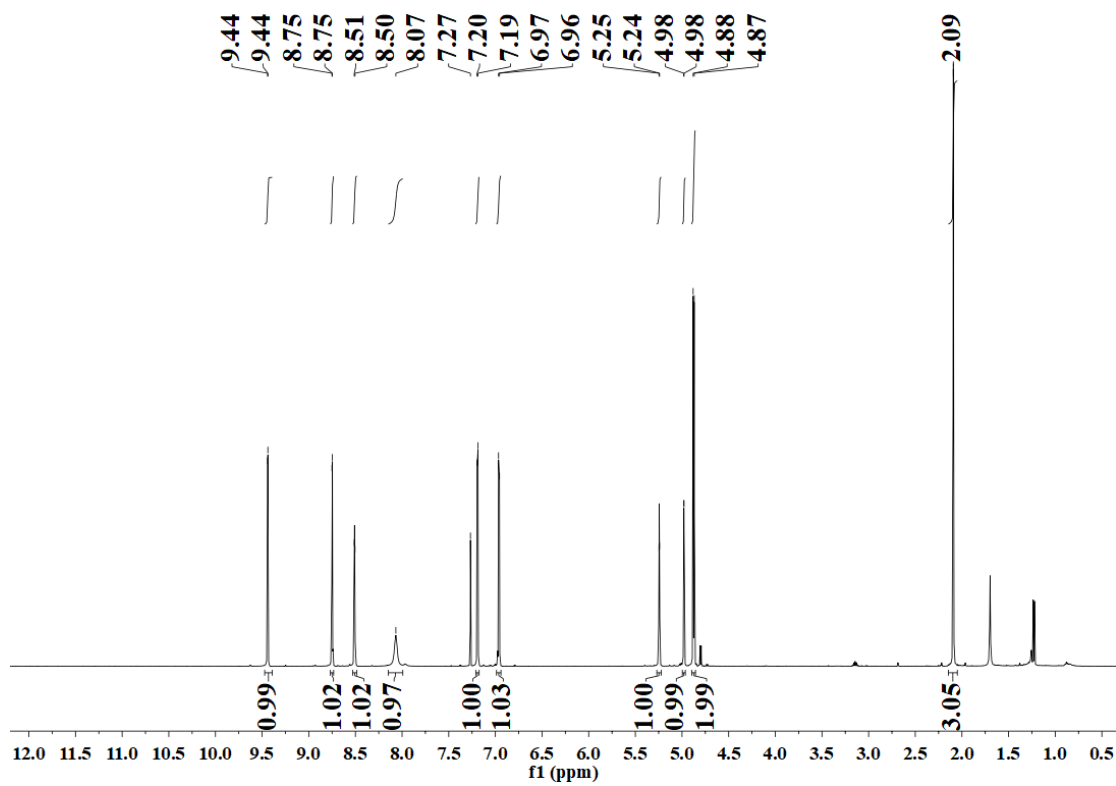

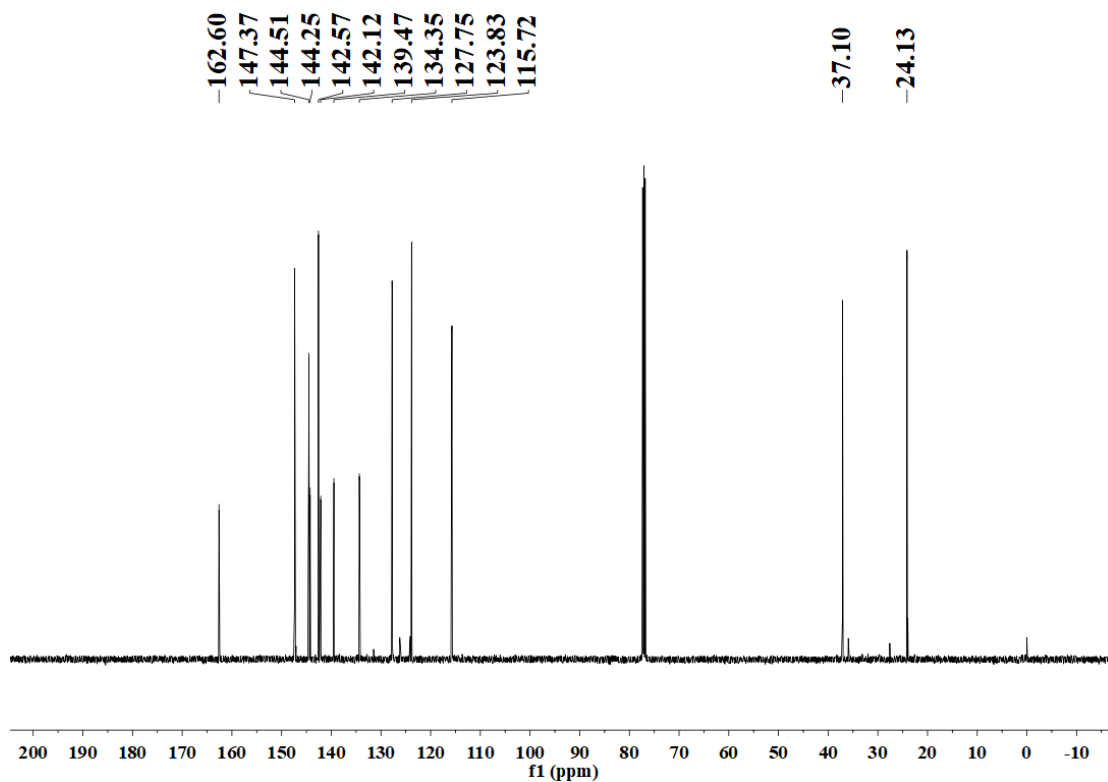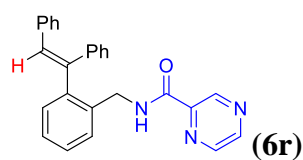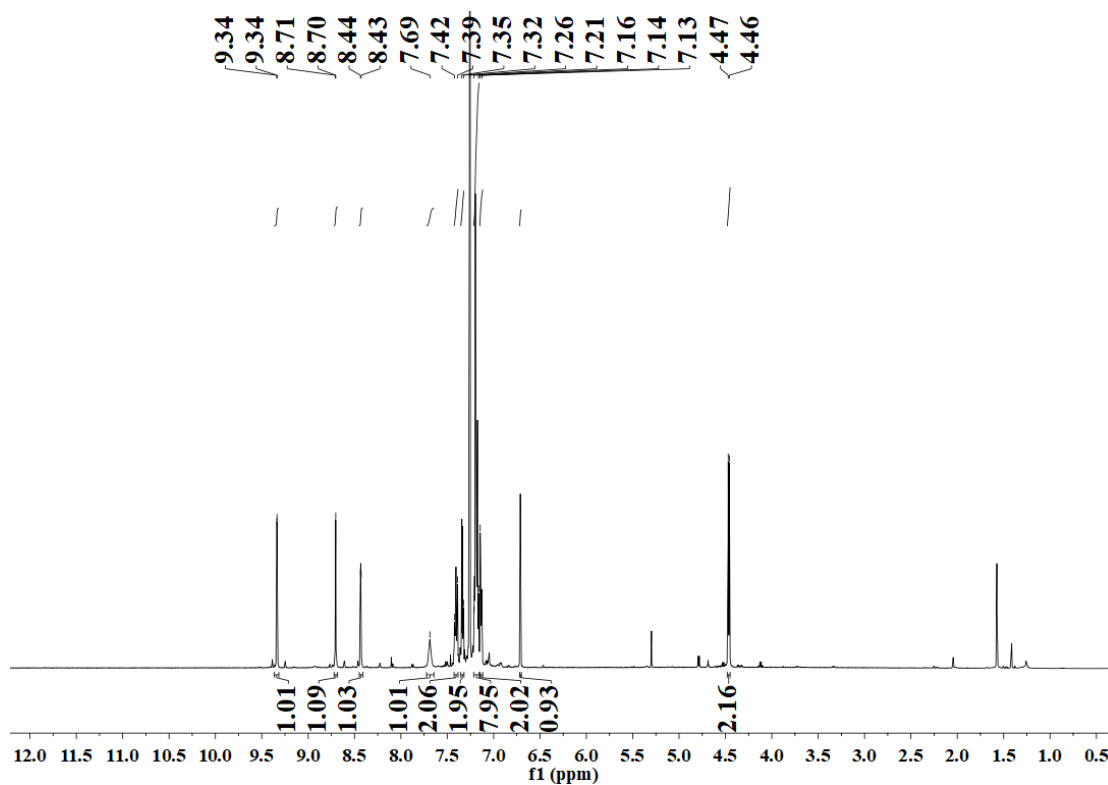

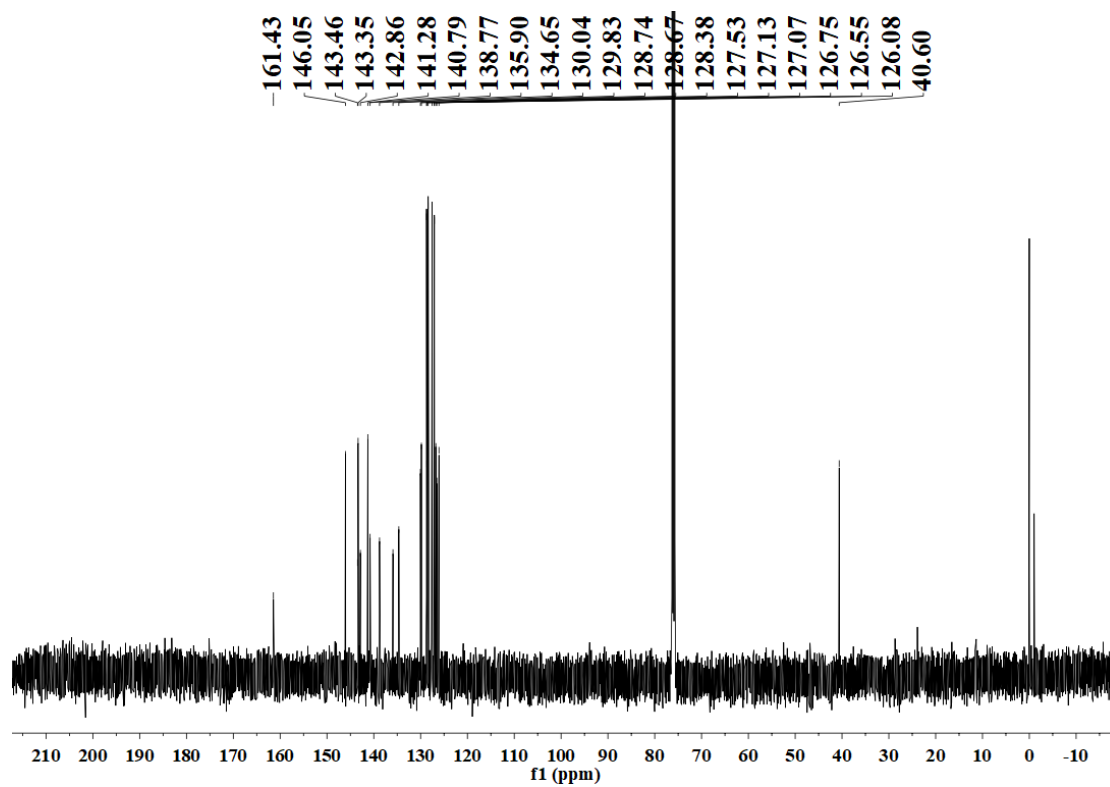

## 7.2 $^1\text{H}$ / $^{13}\text{C}$ NMR Charts of the Products

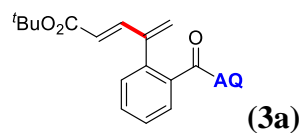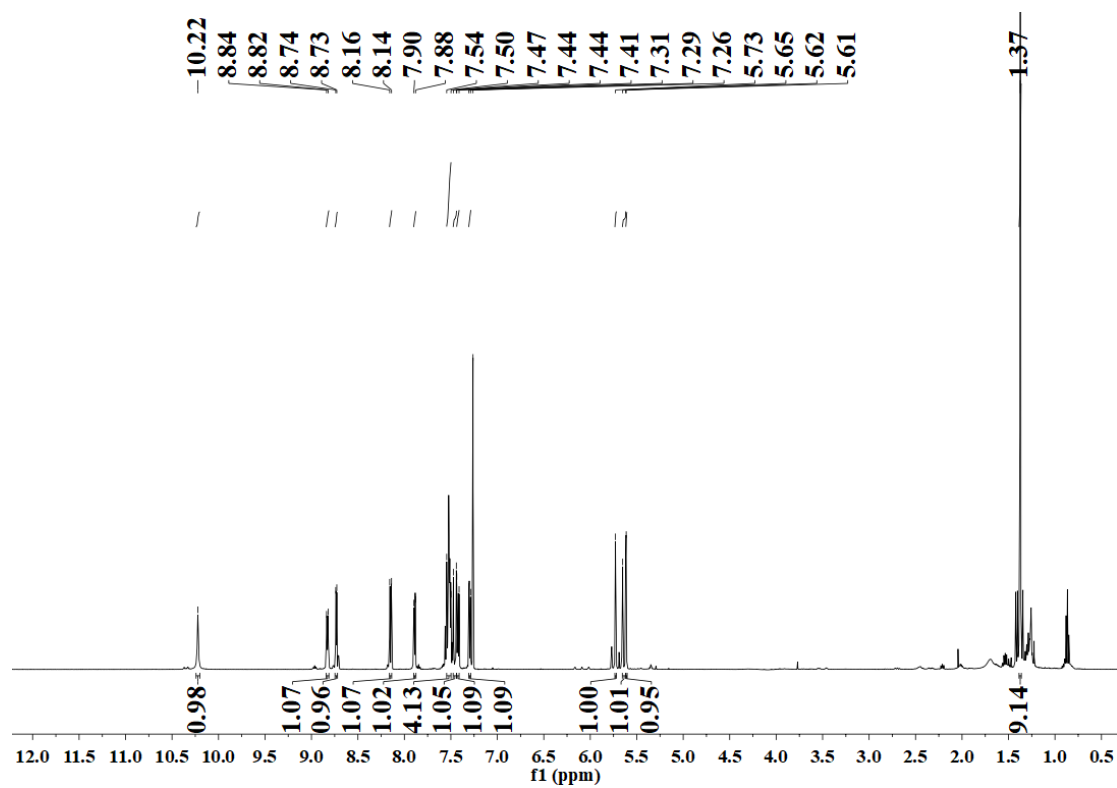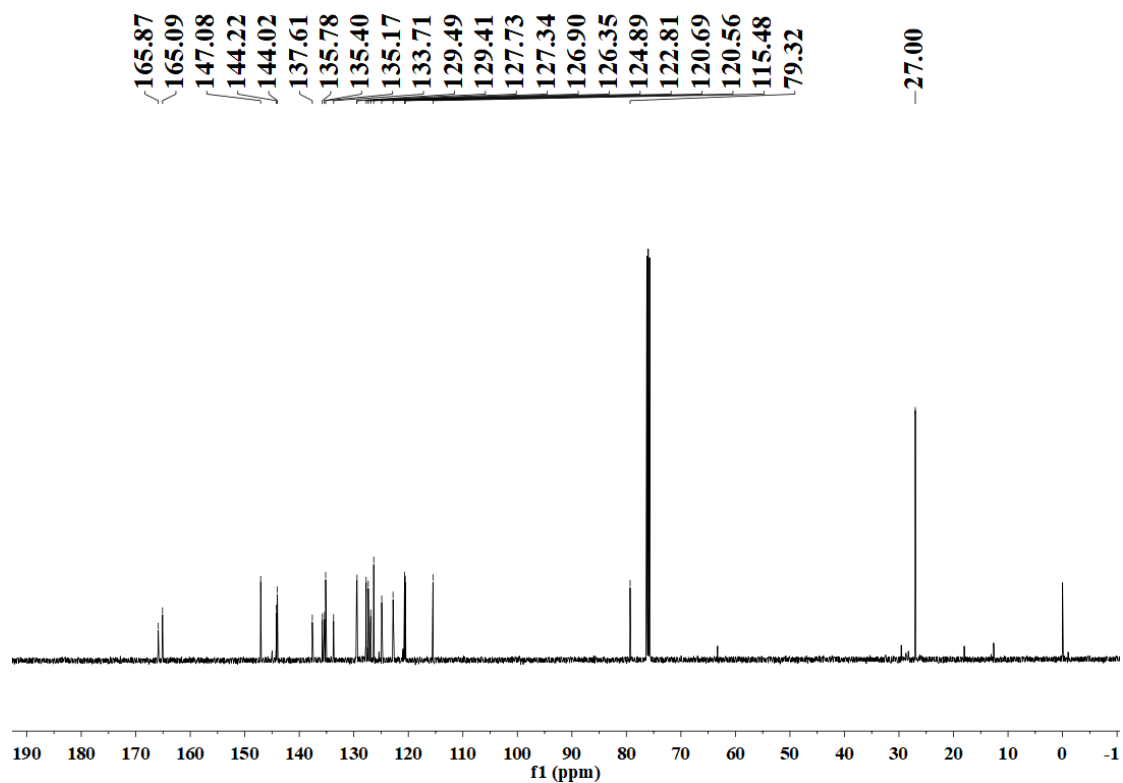

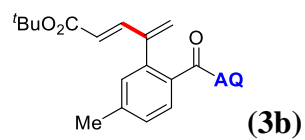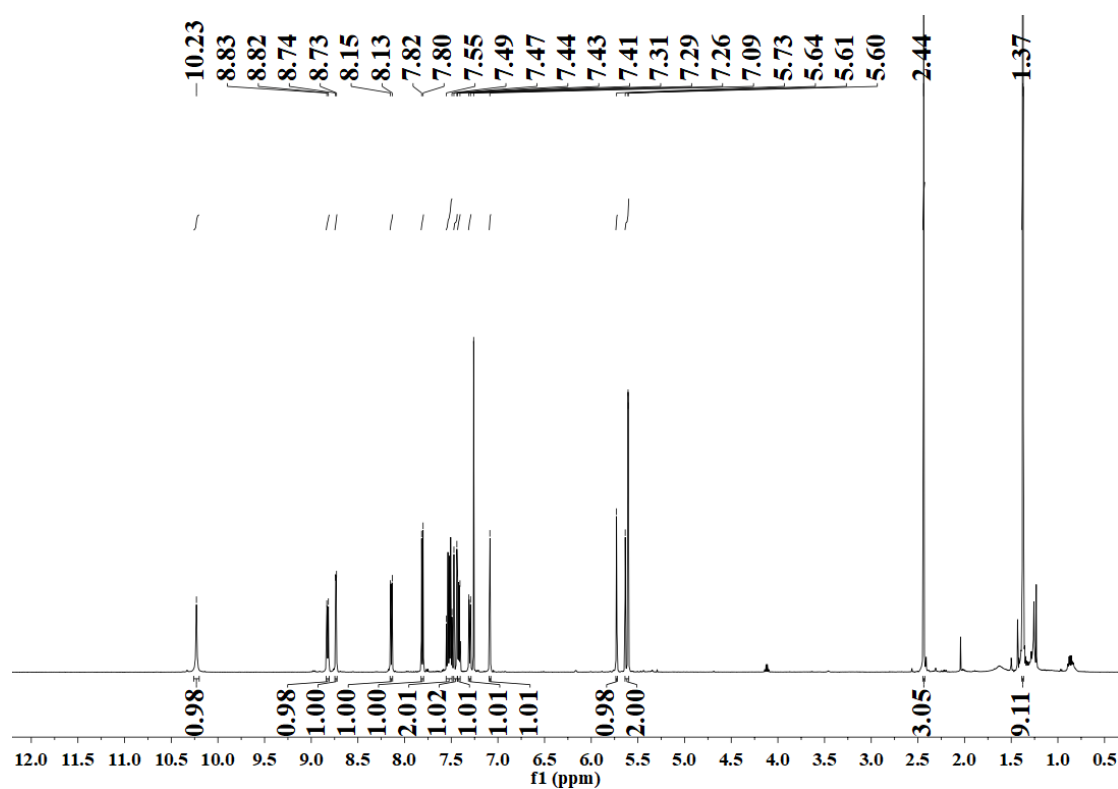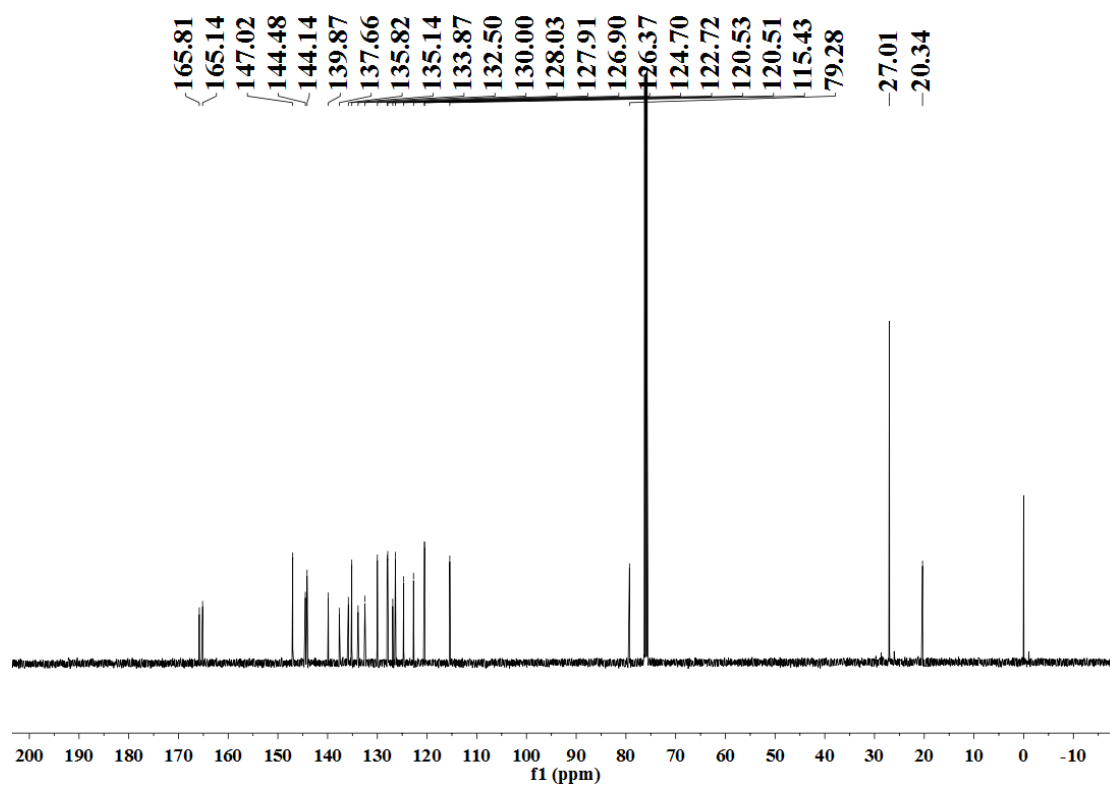

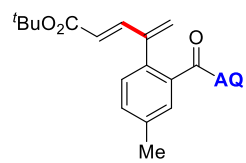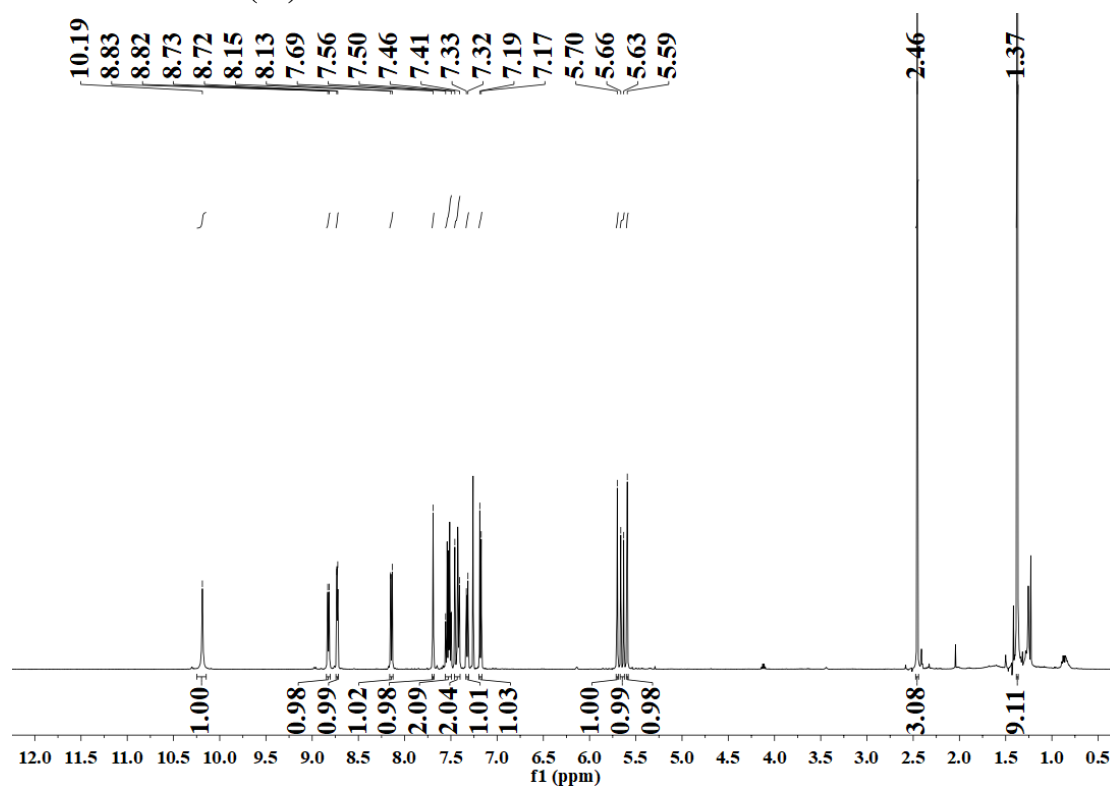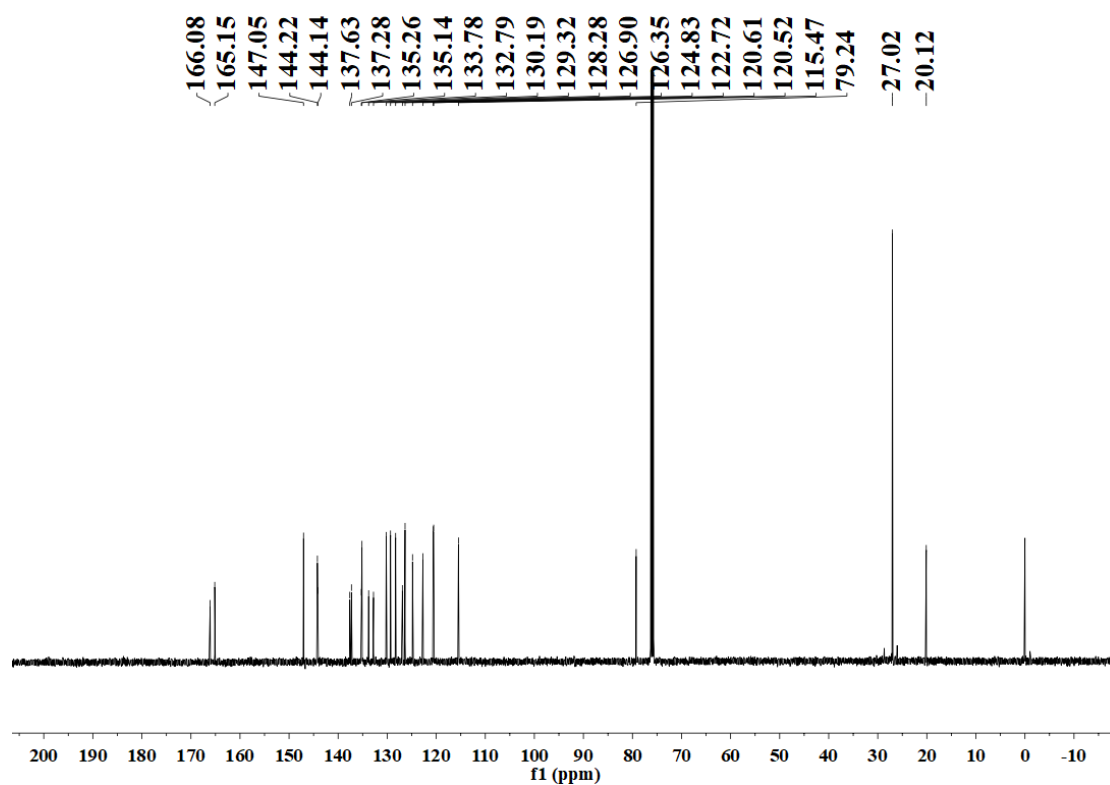

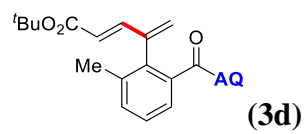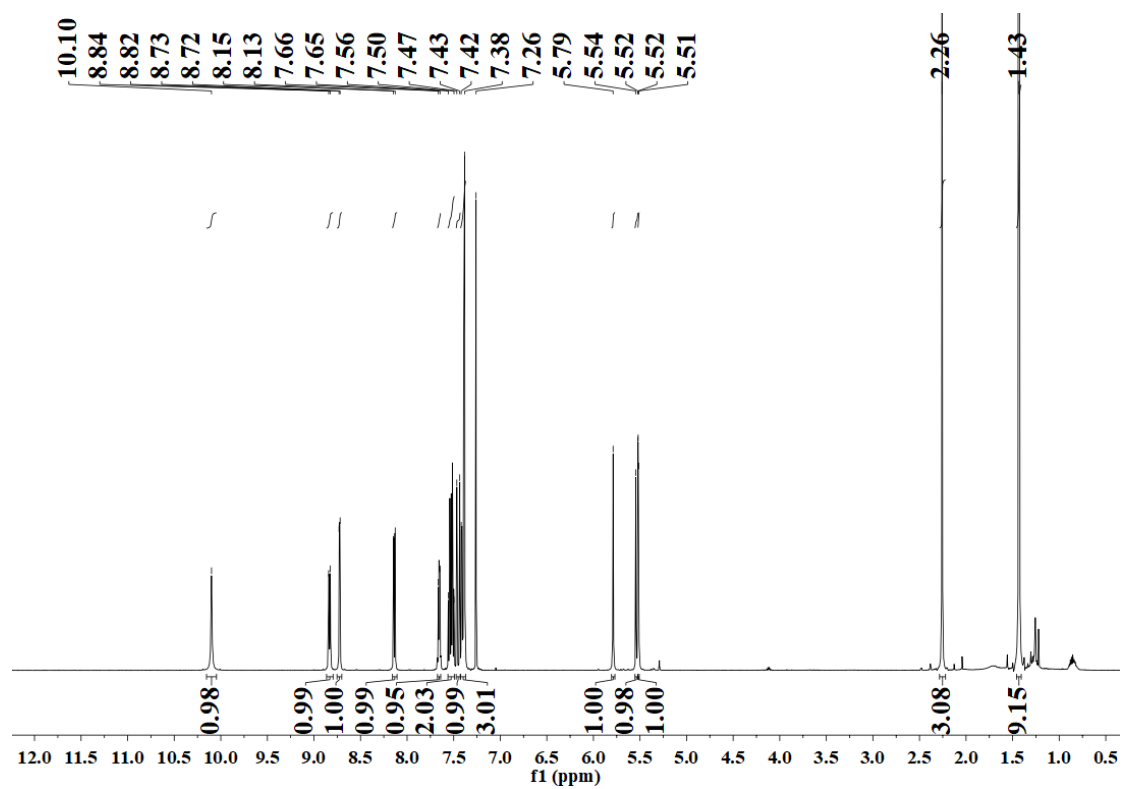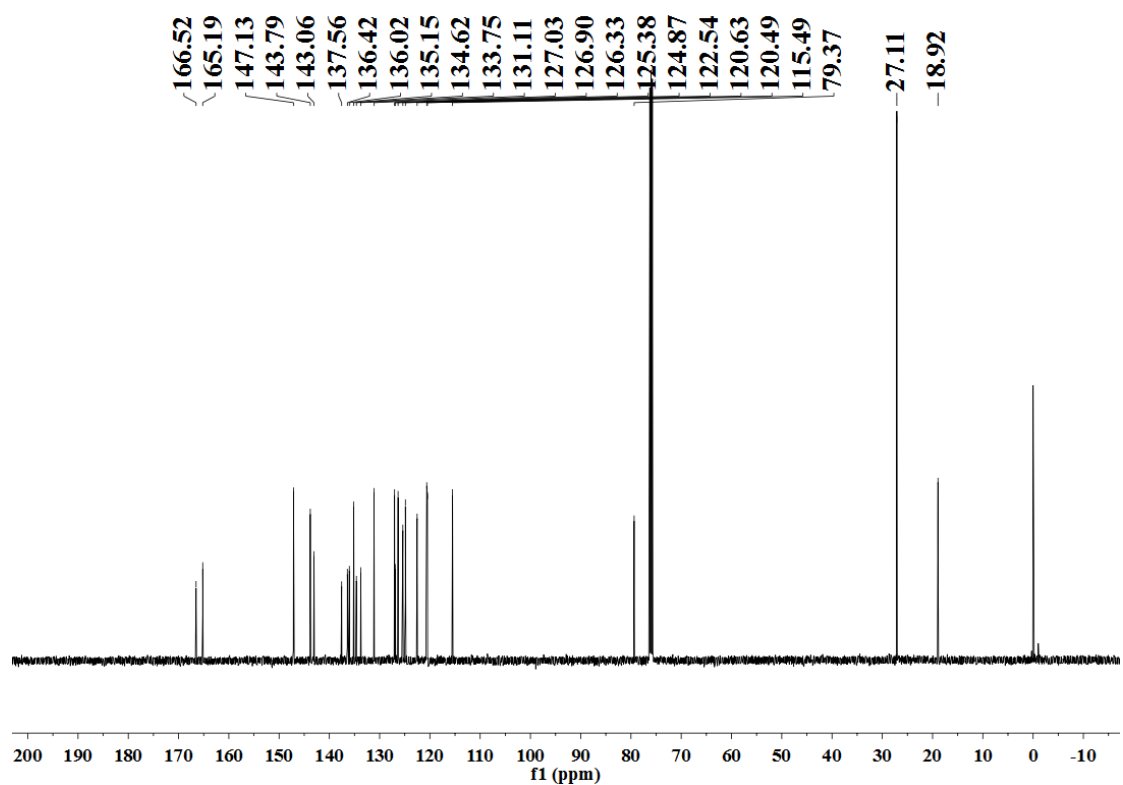



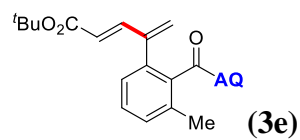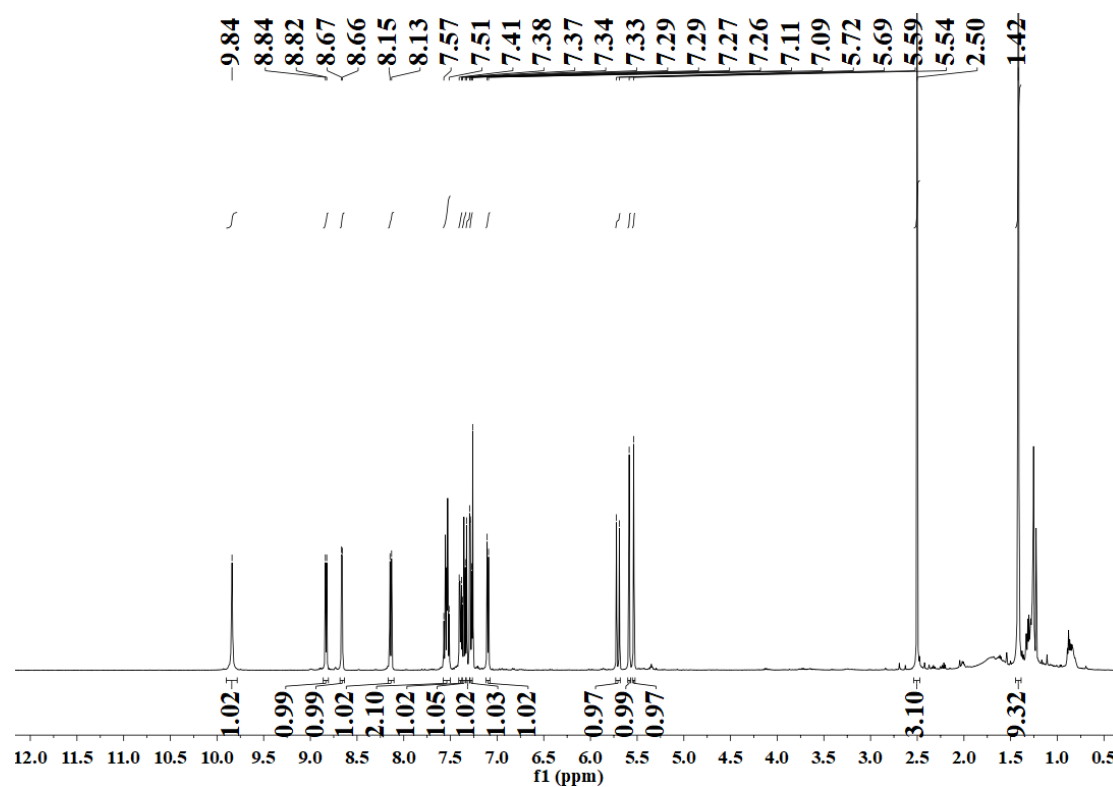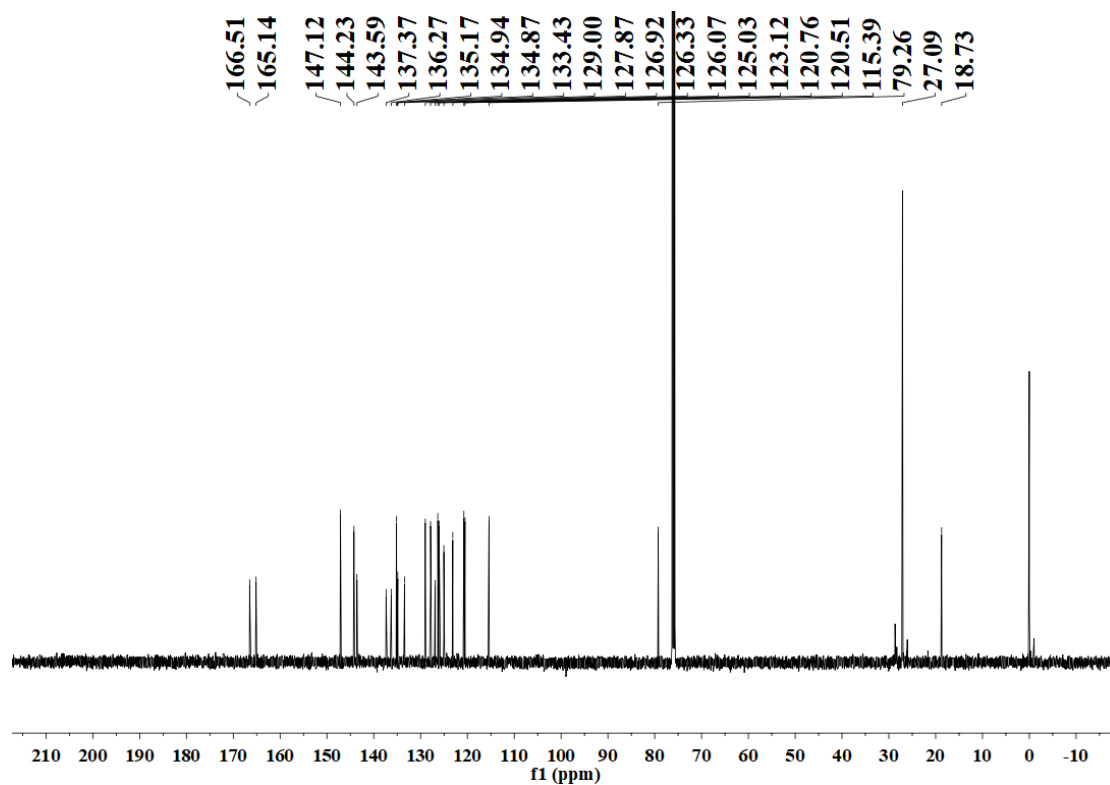

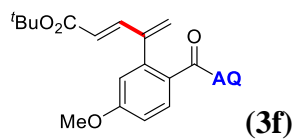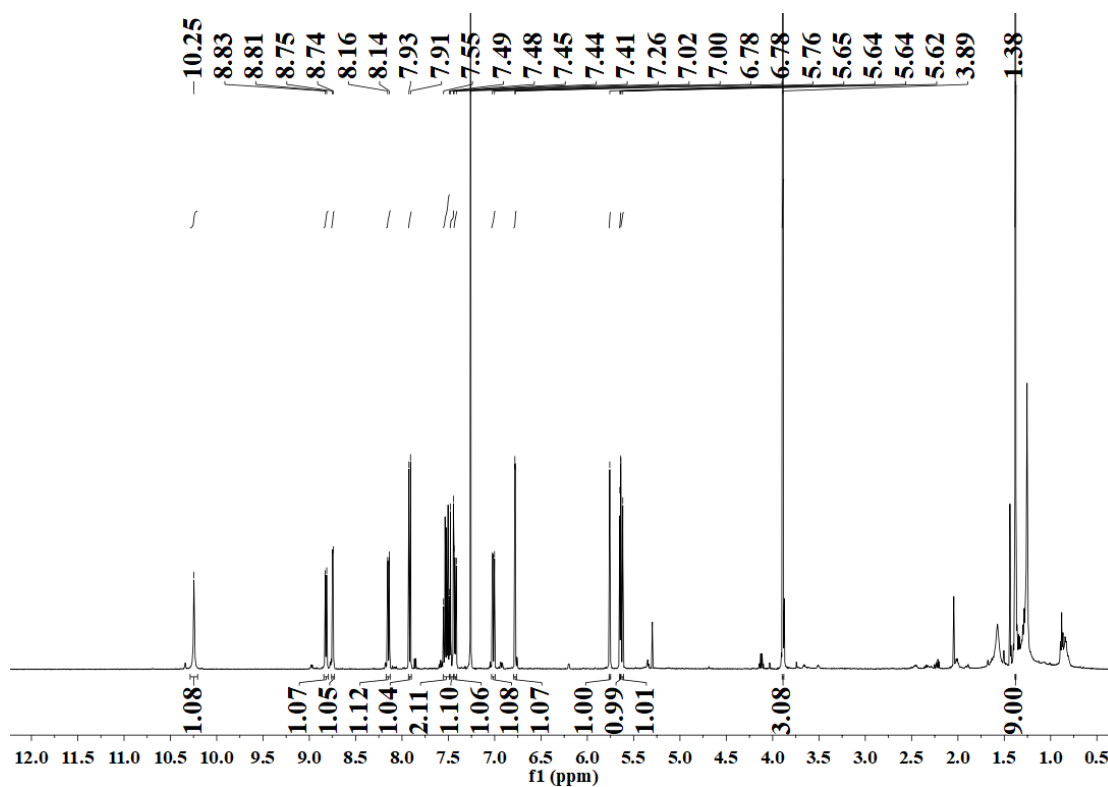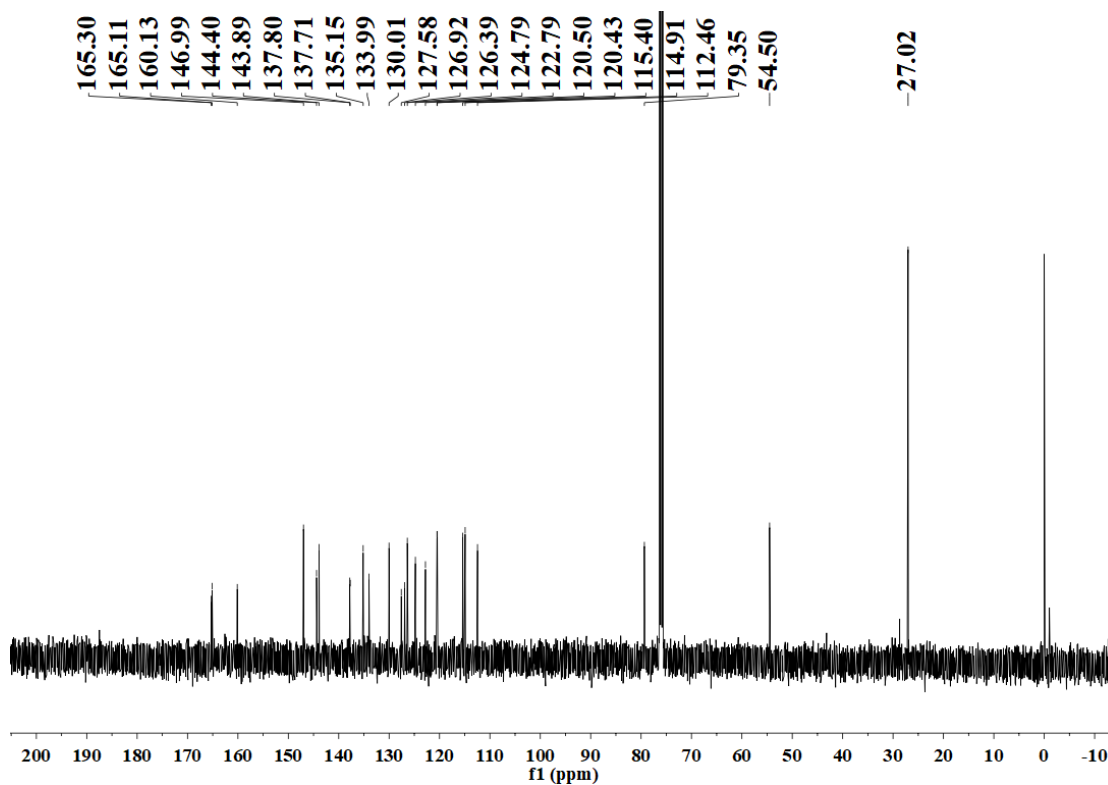

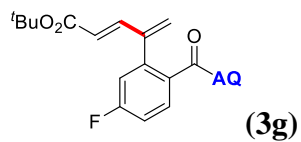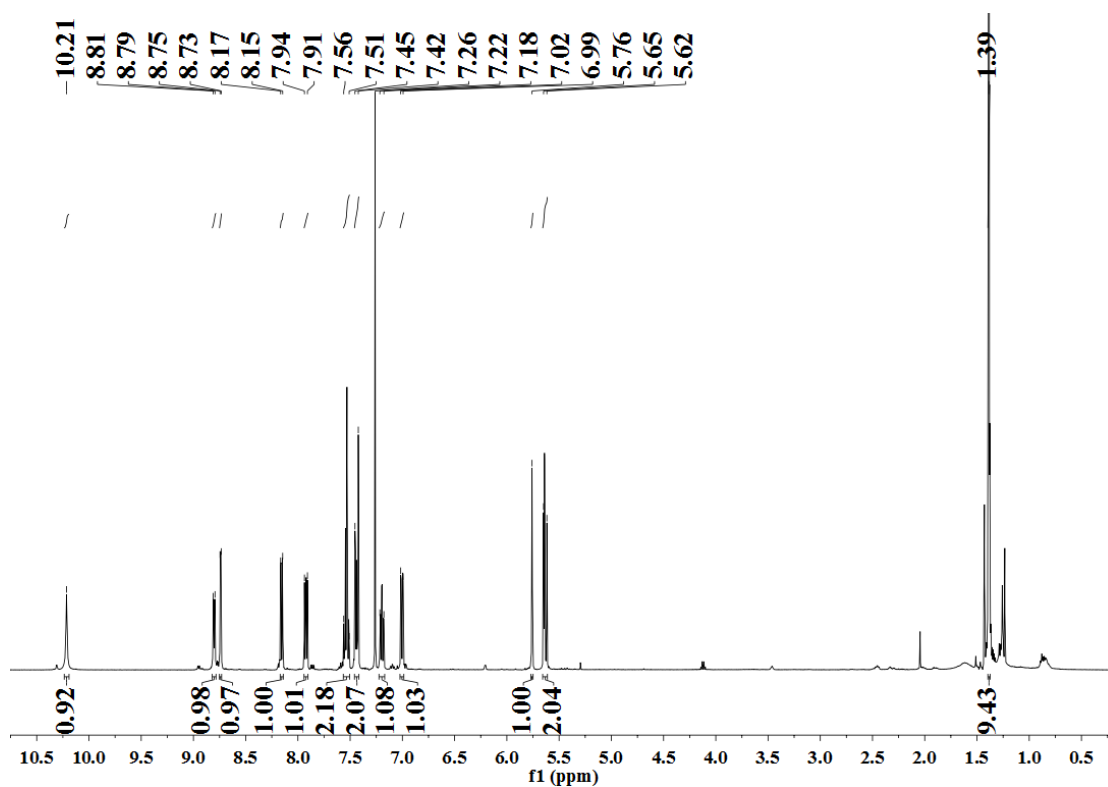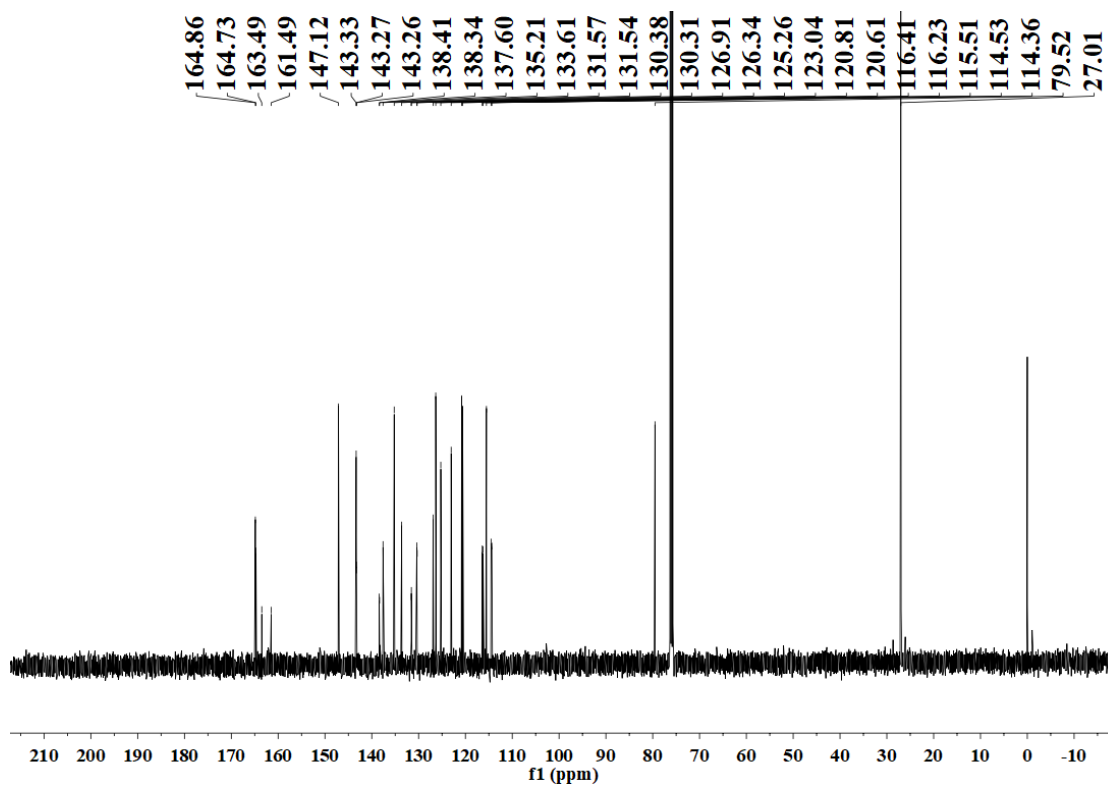

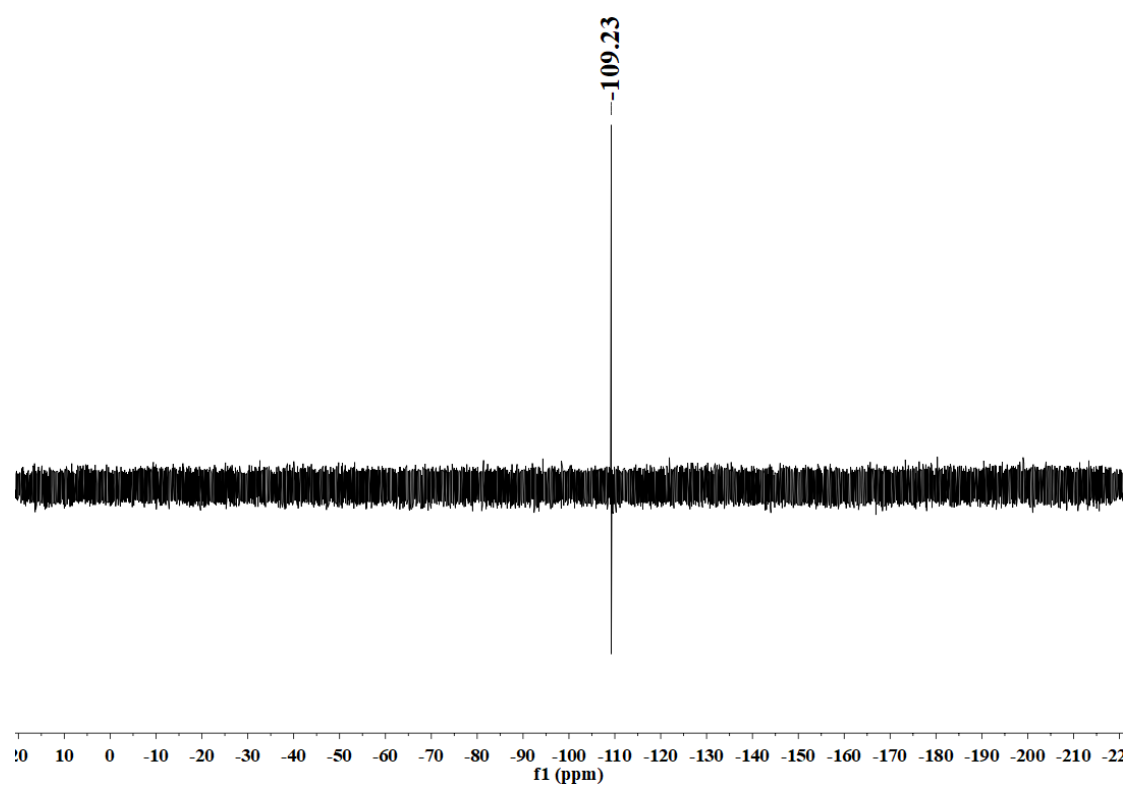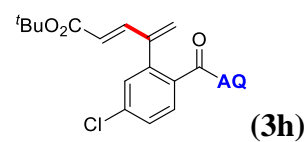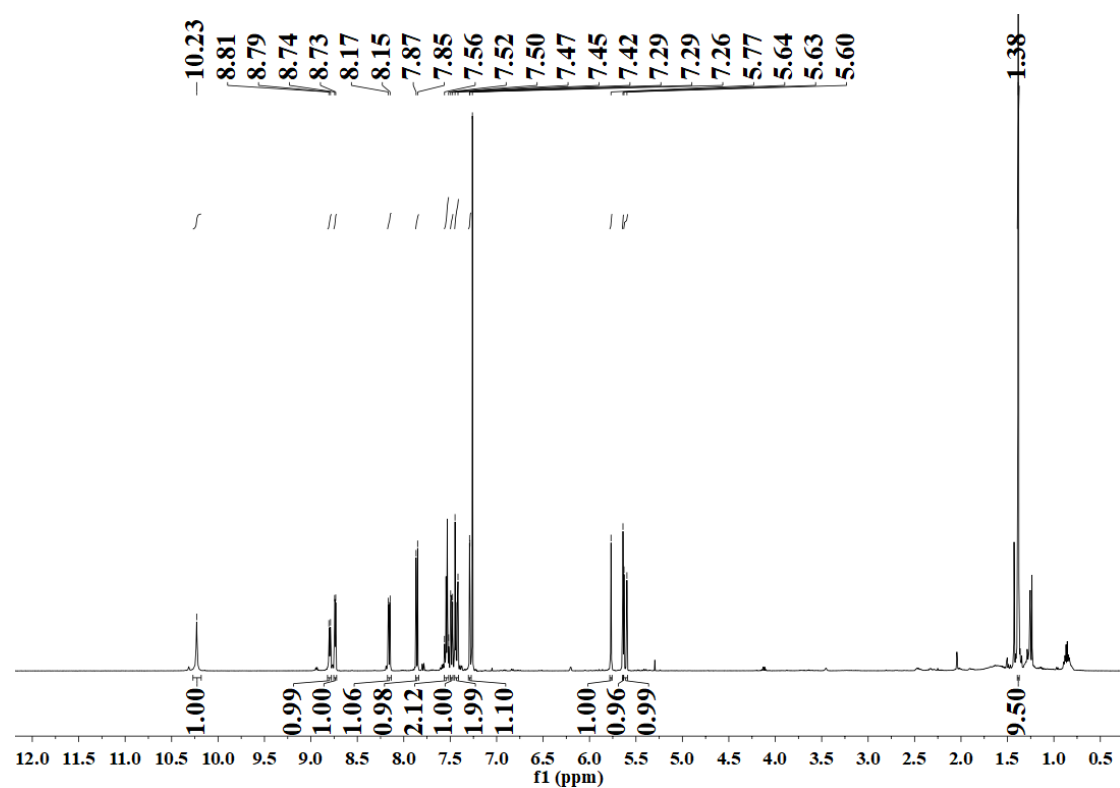

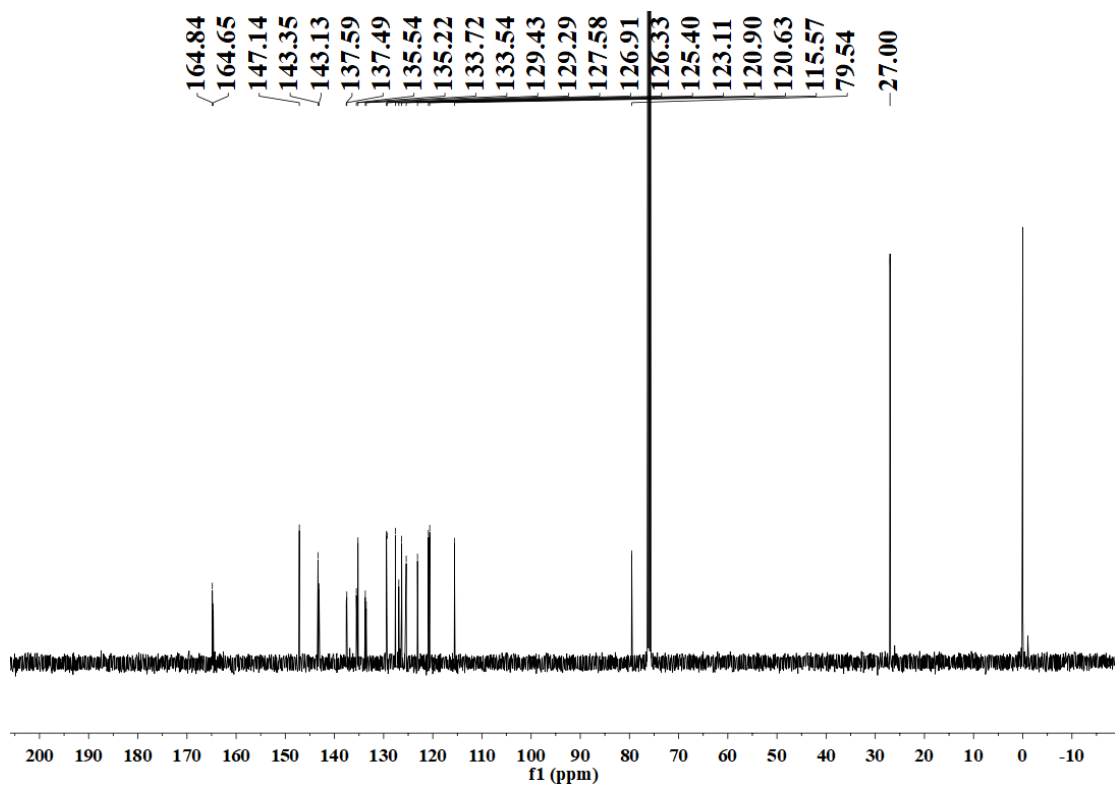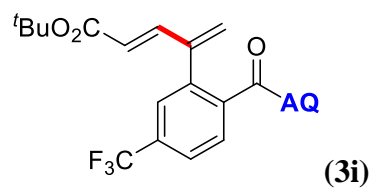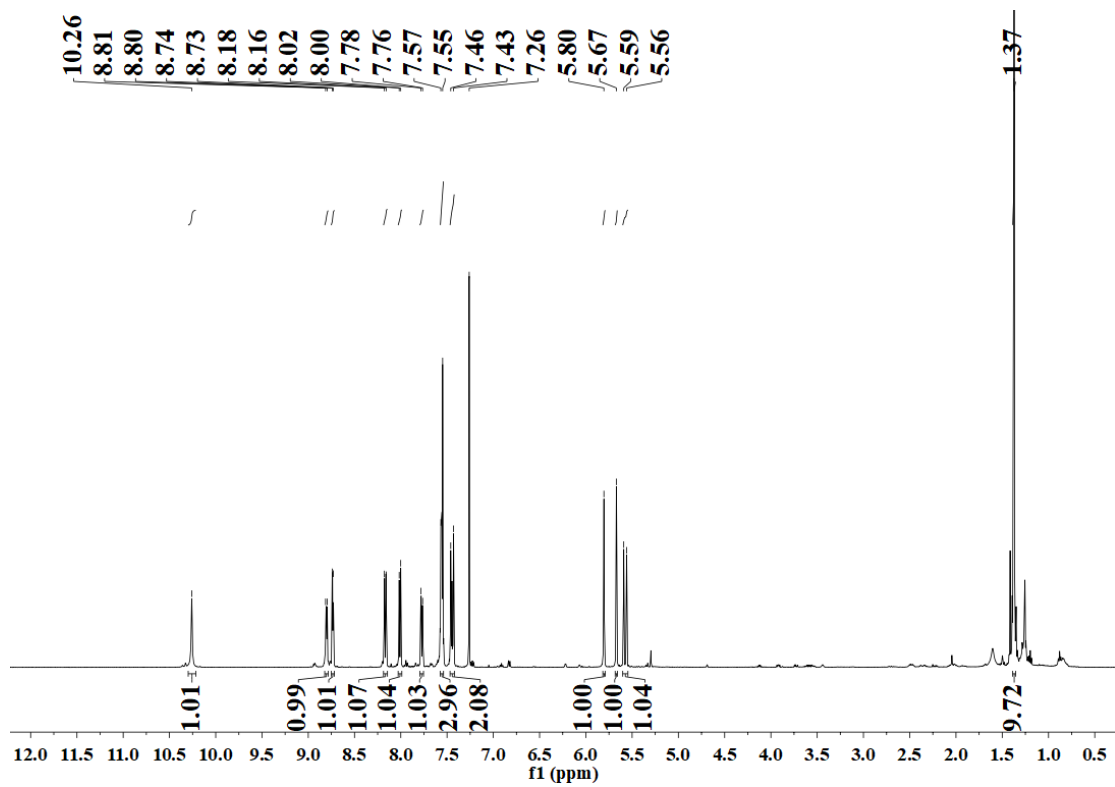

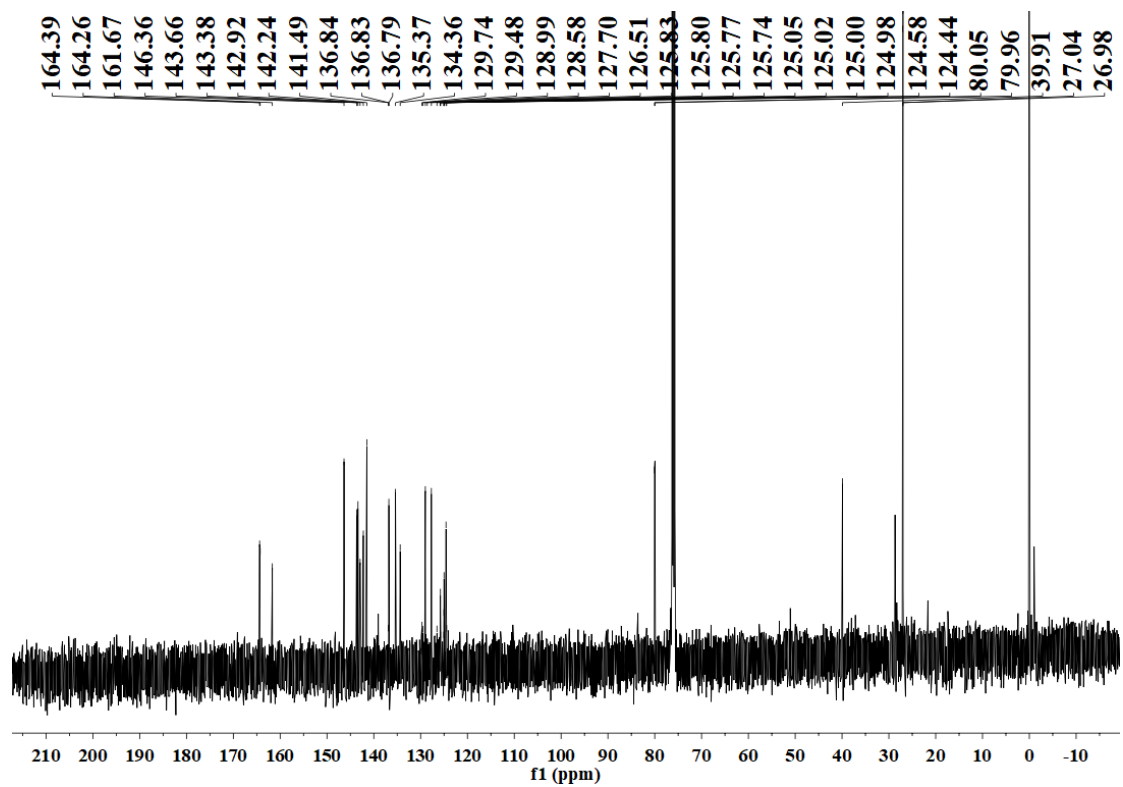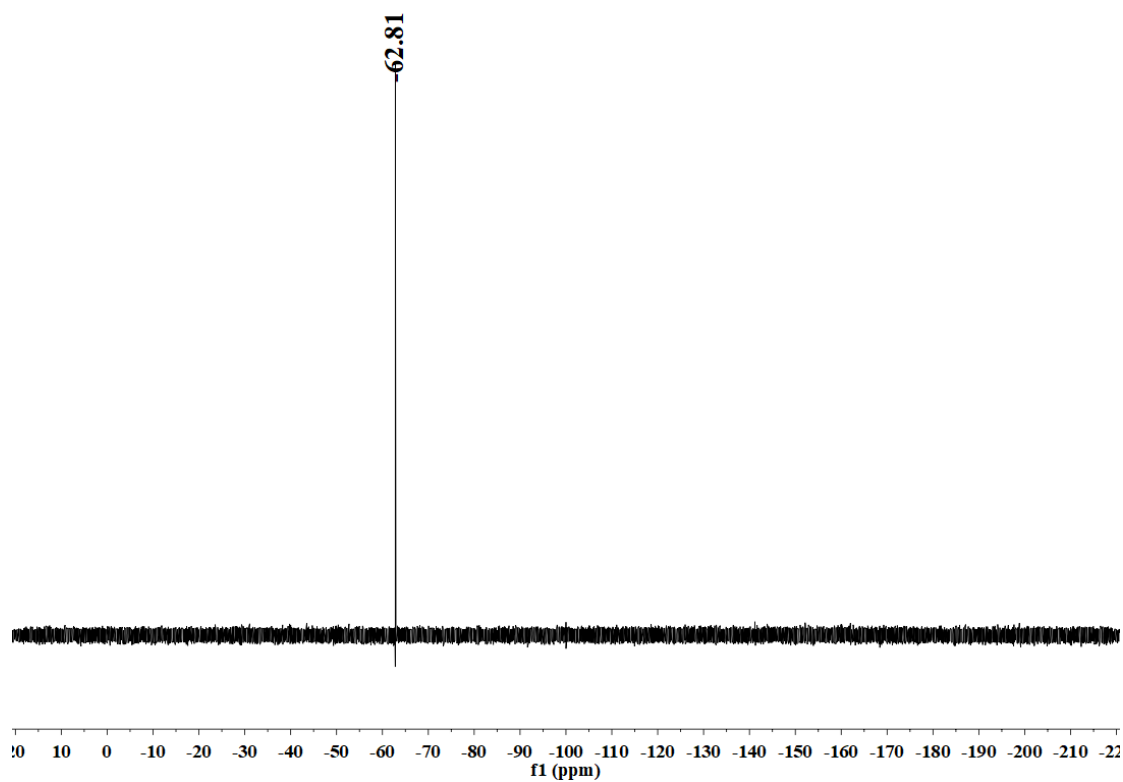

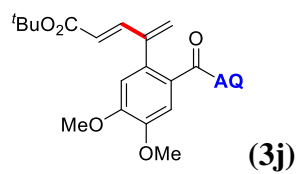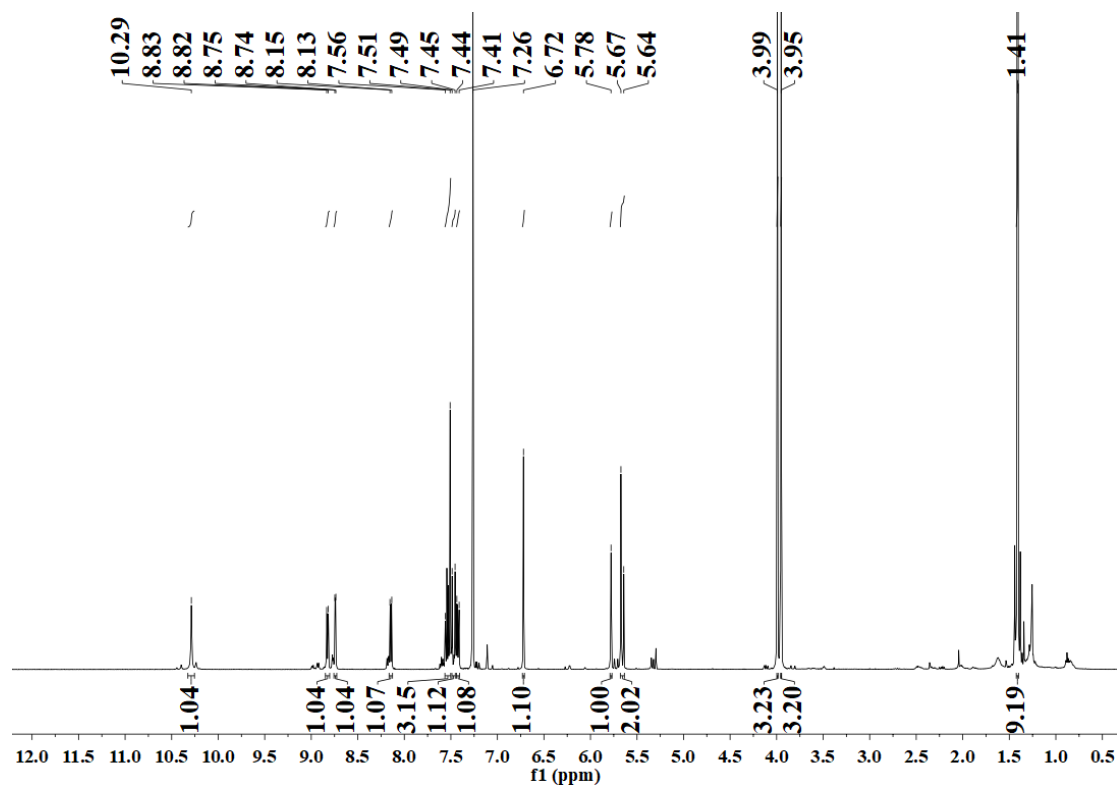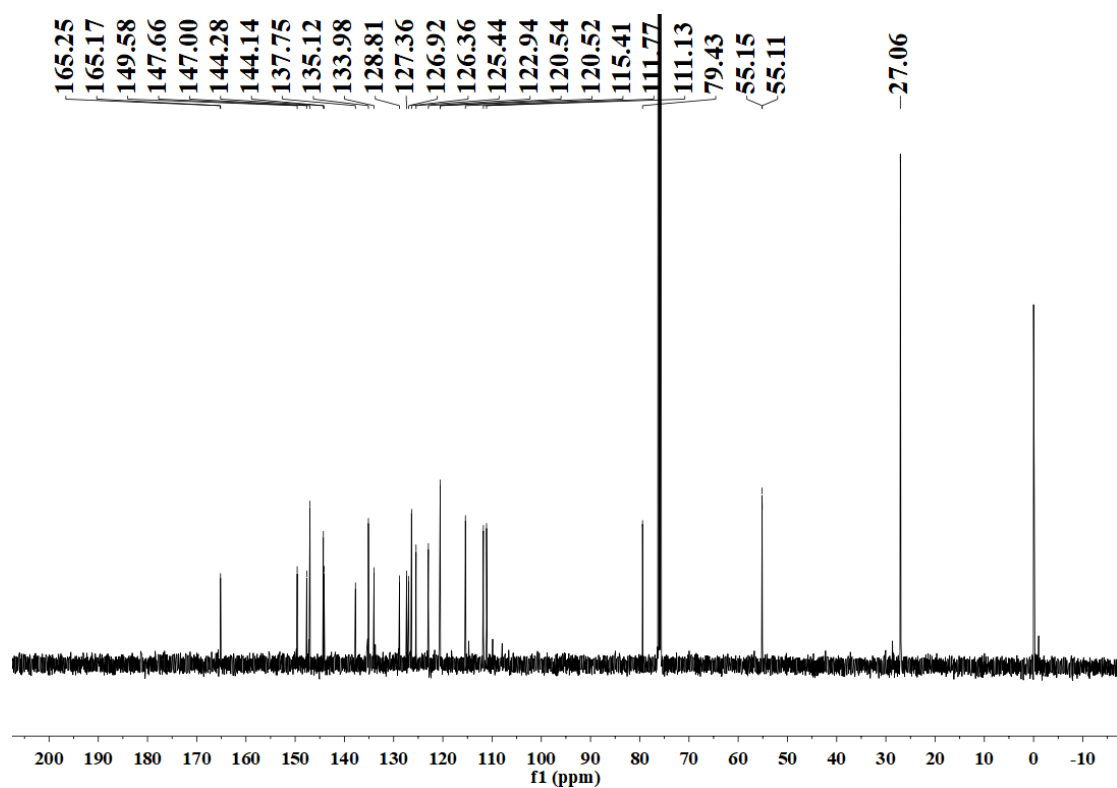

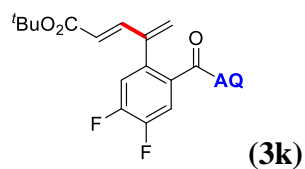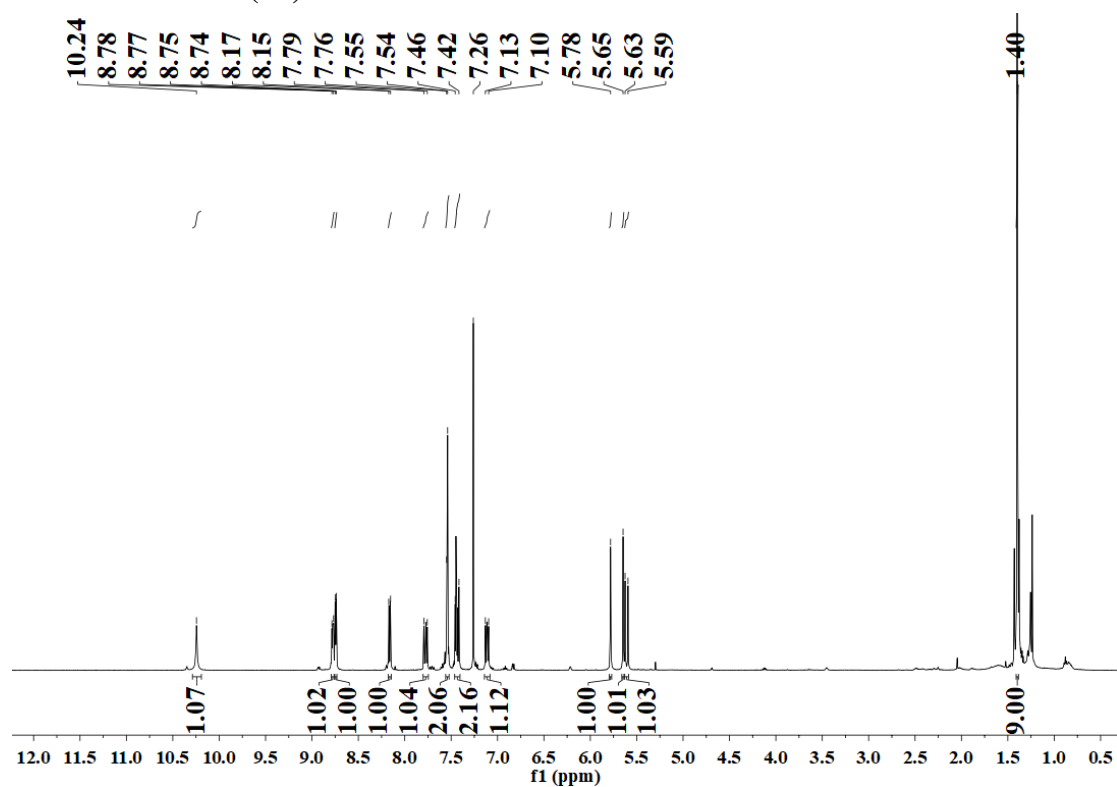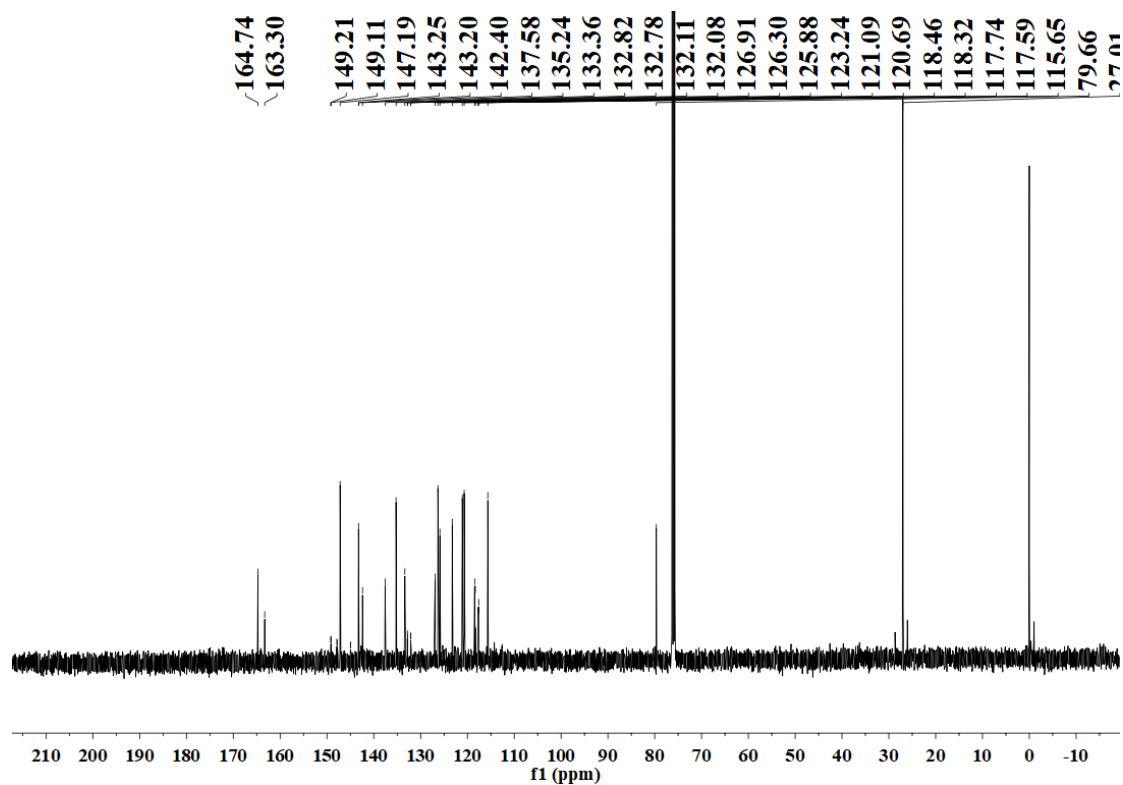



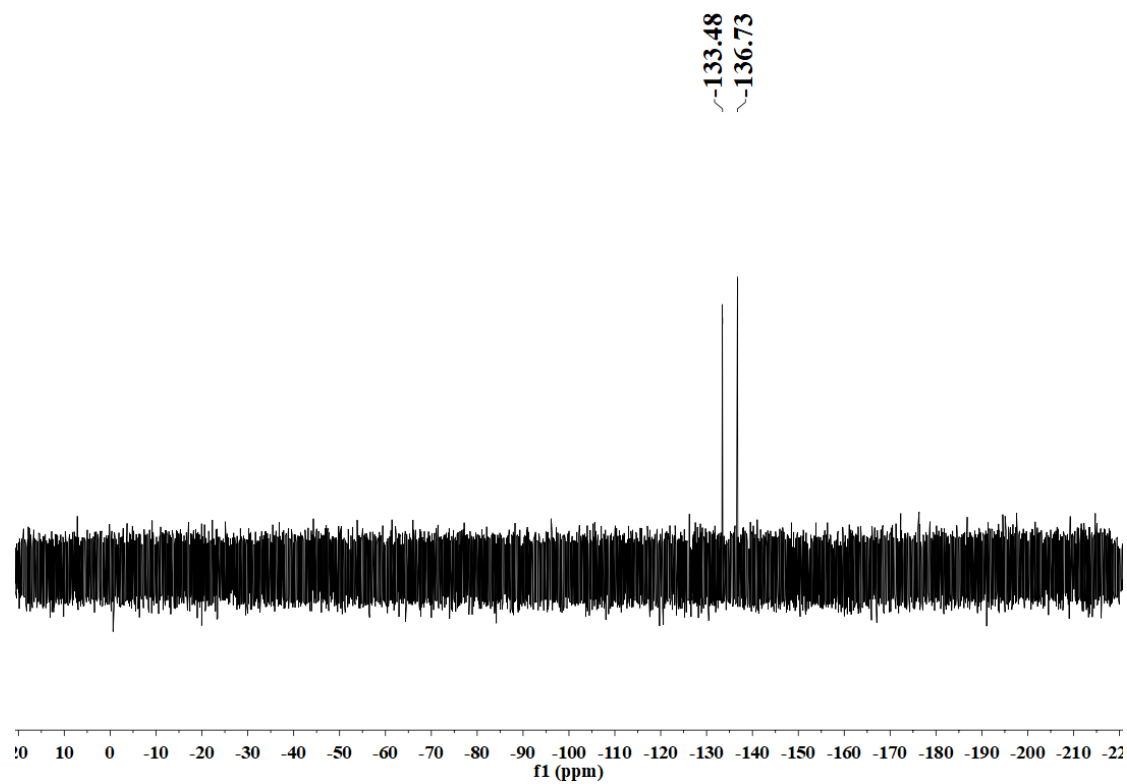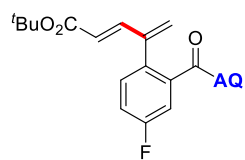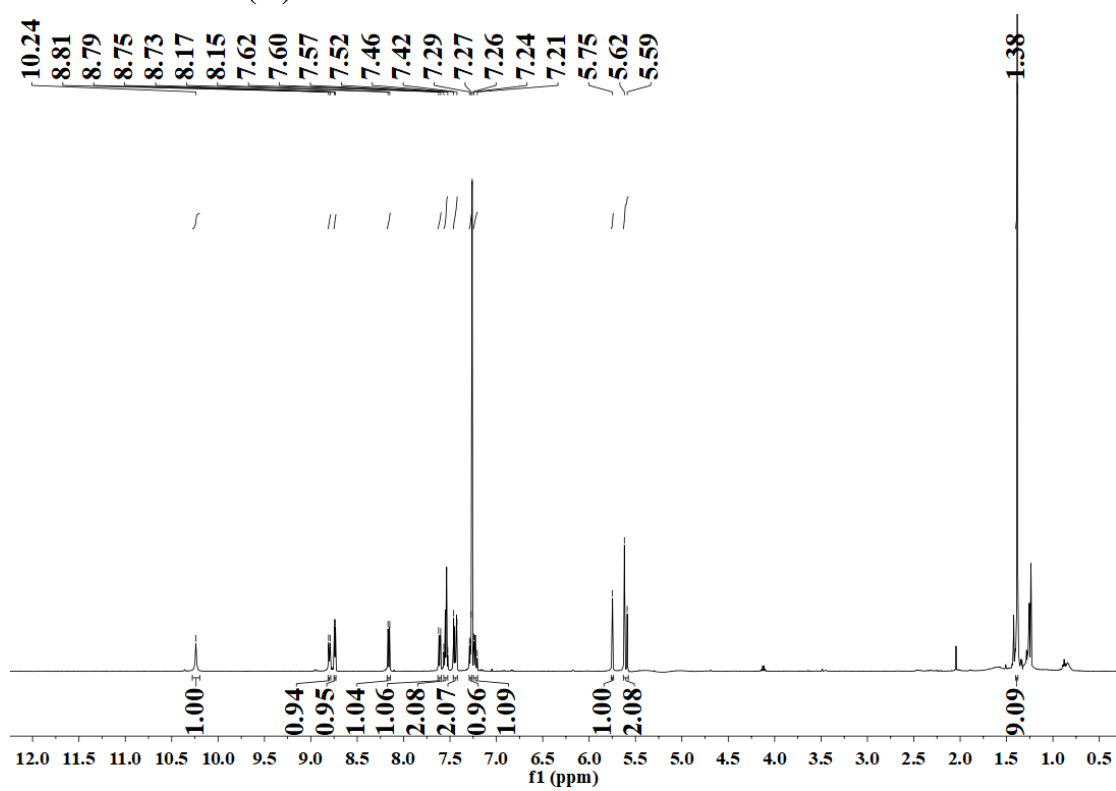

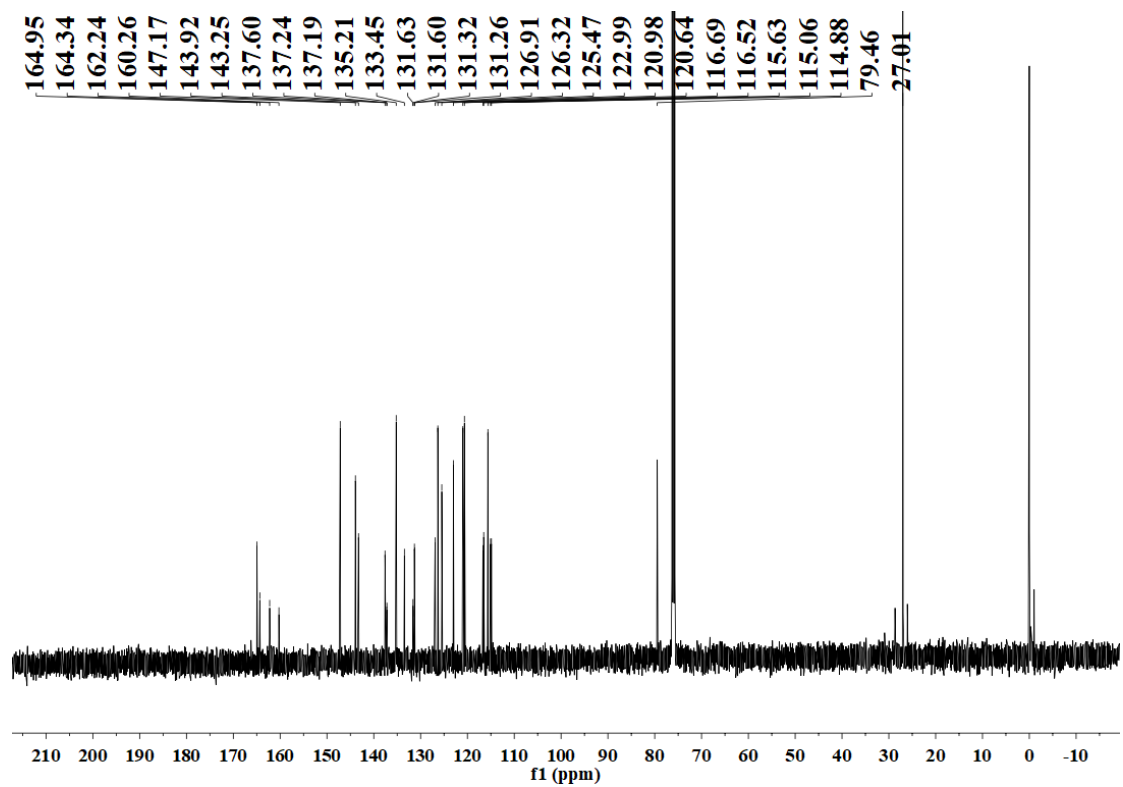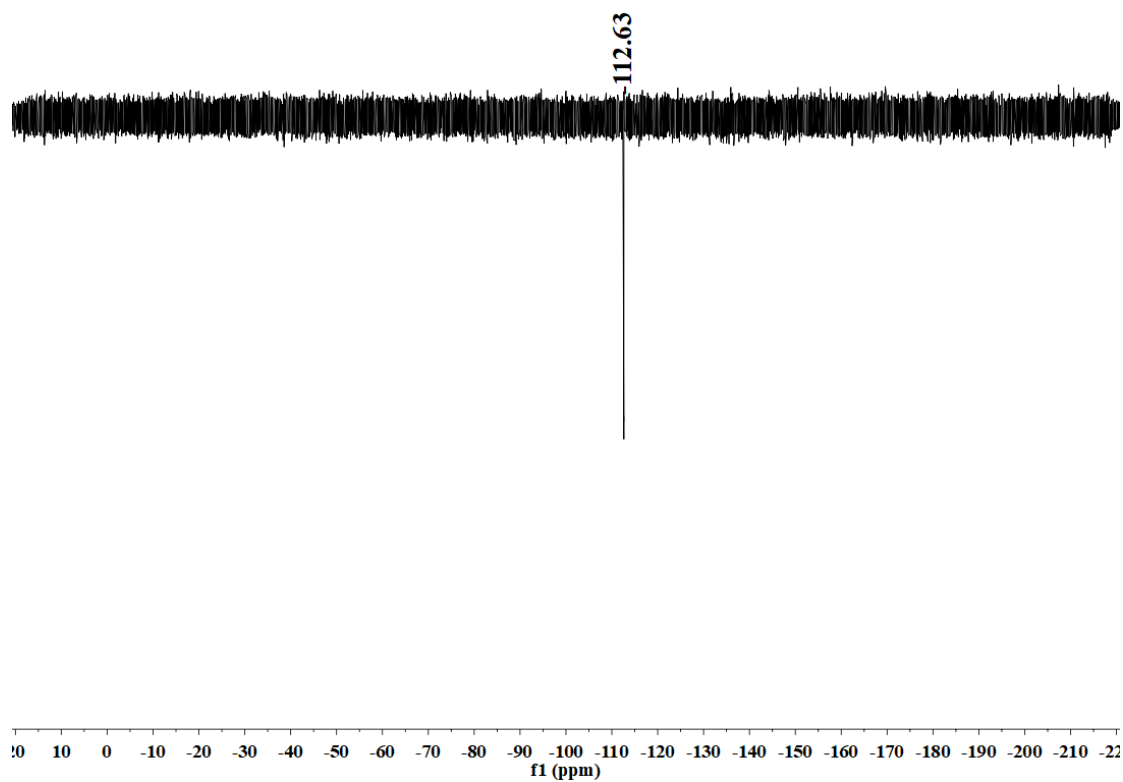

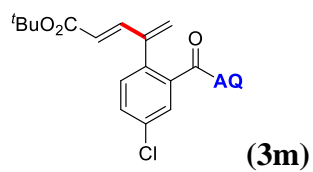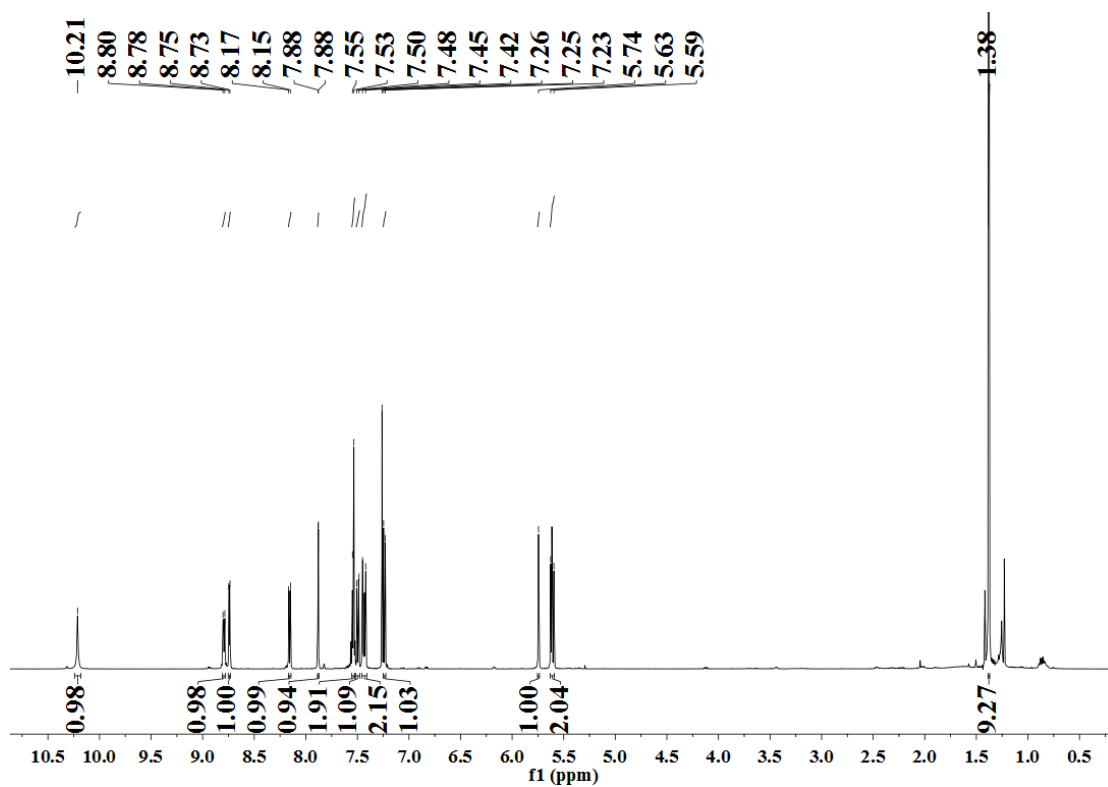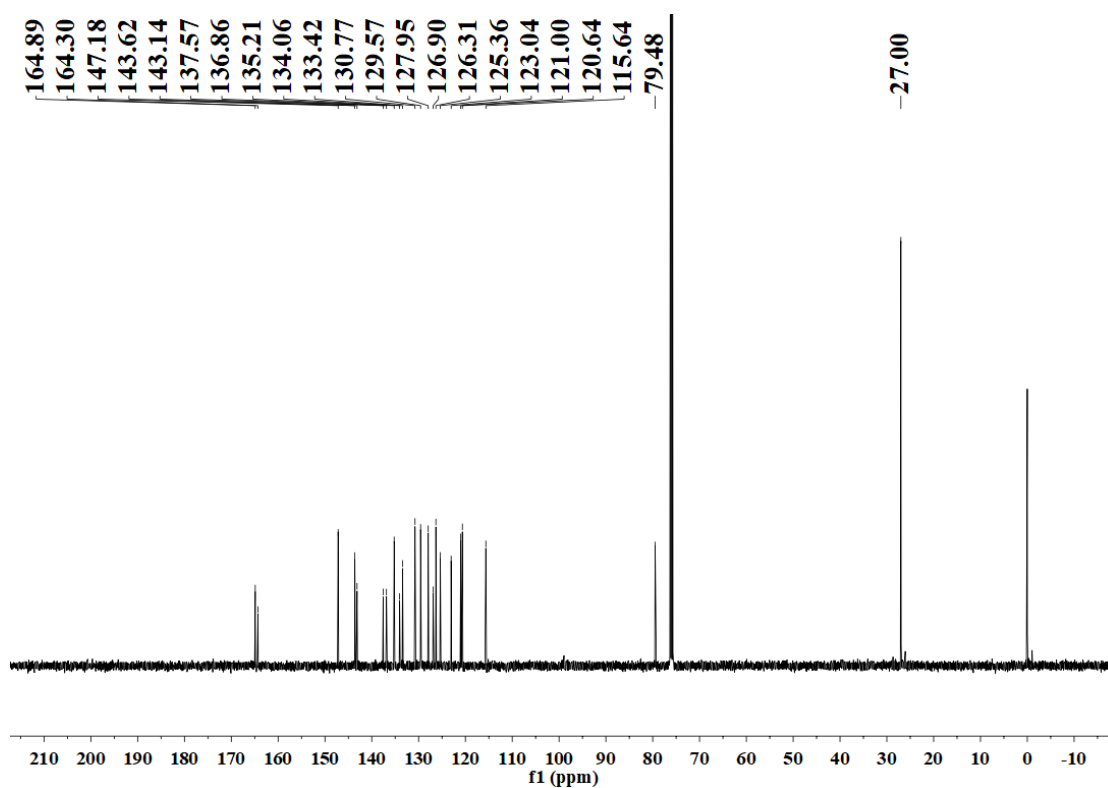

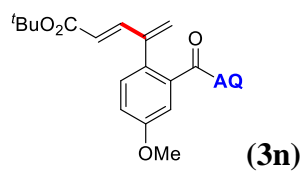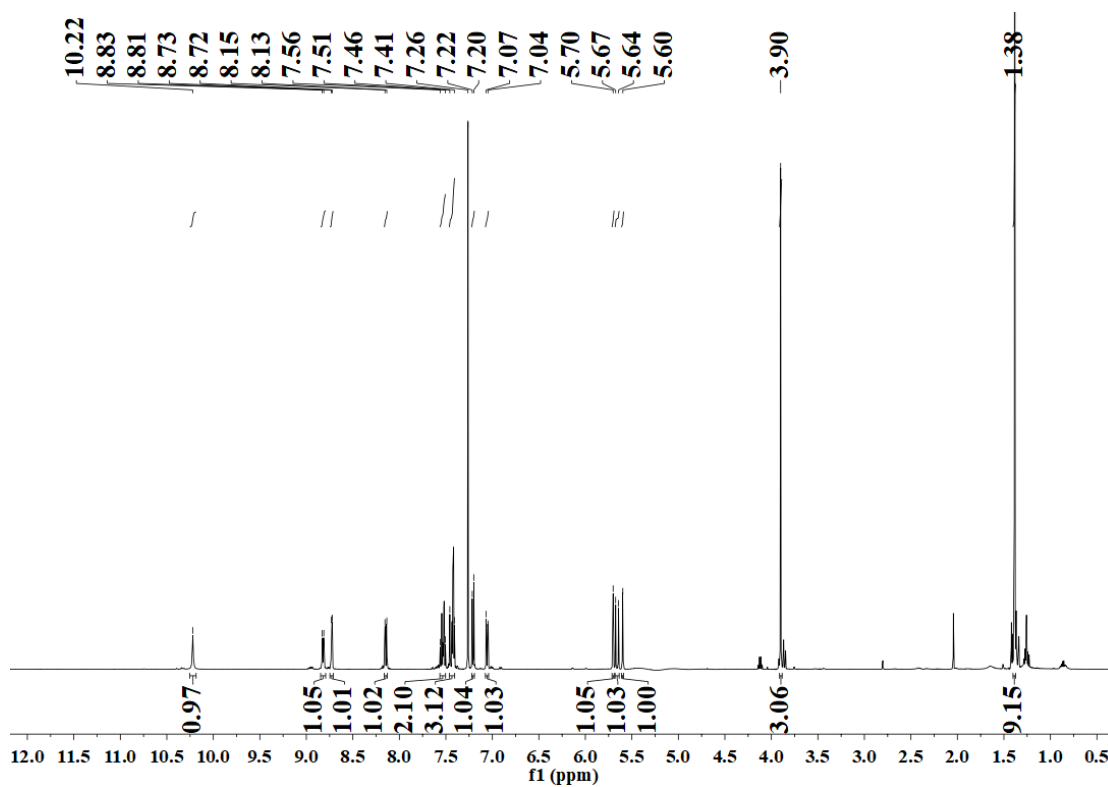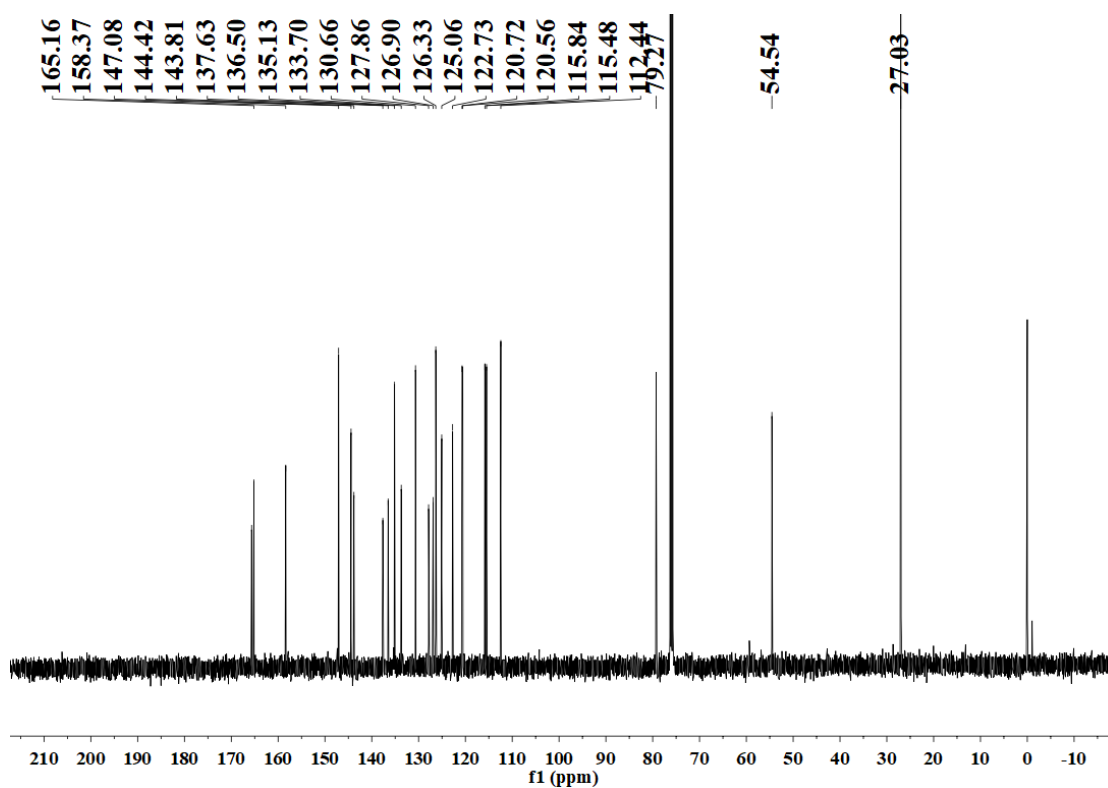

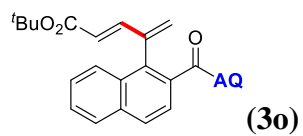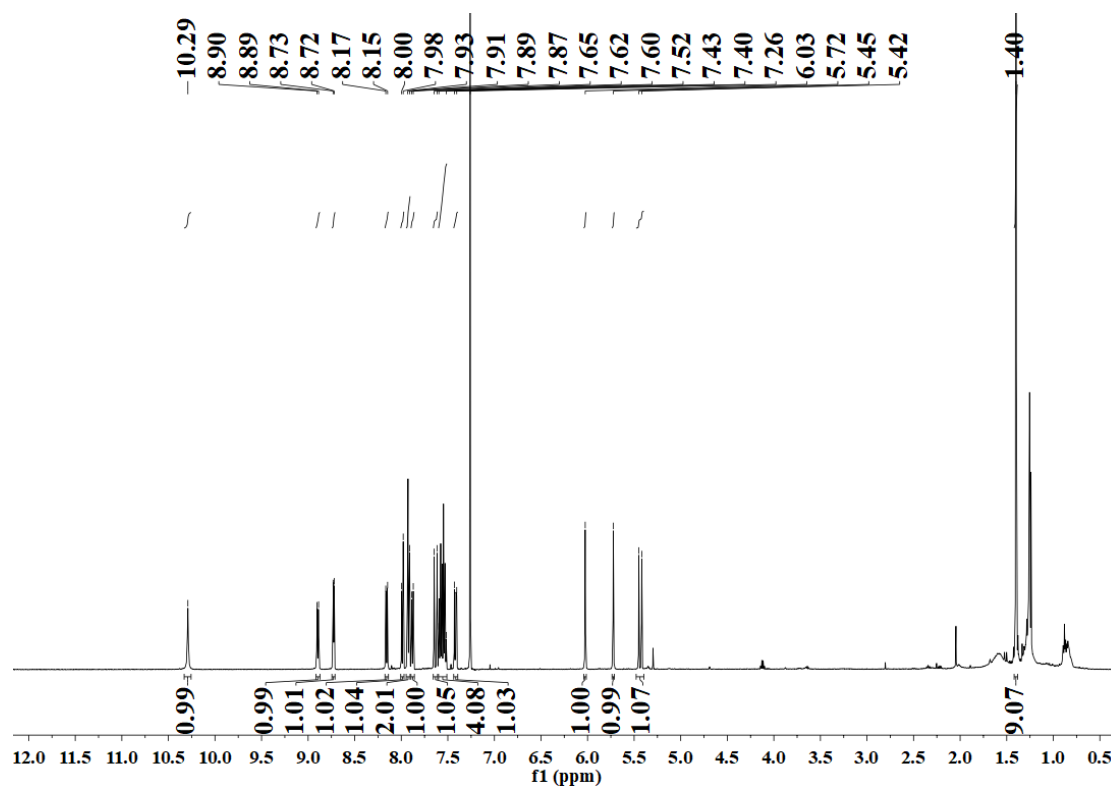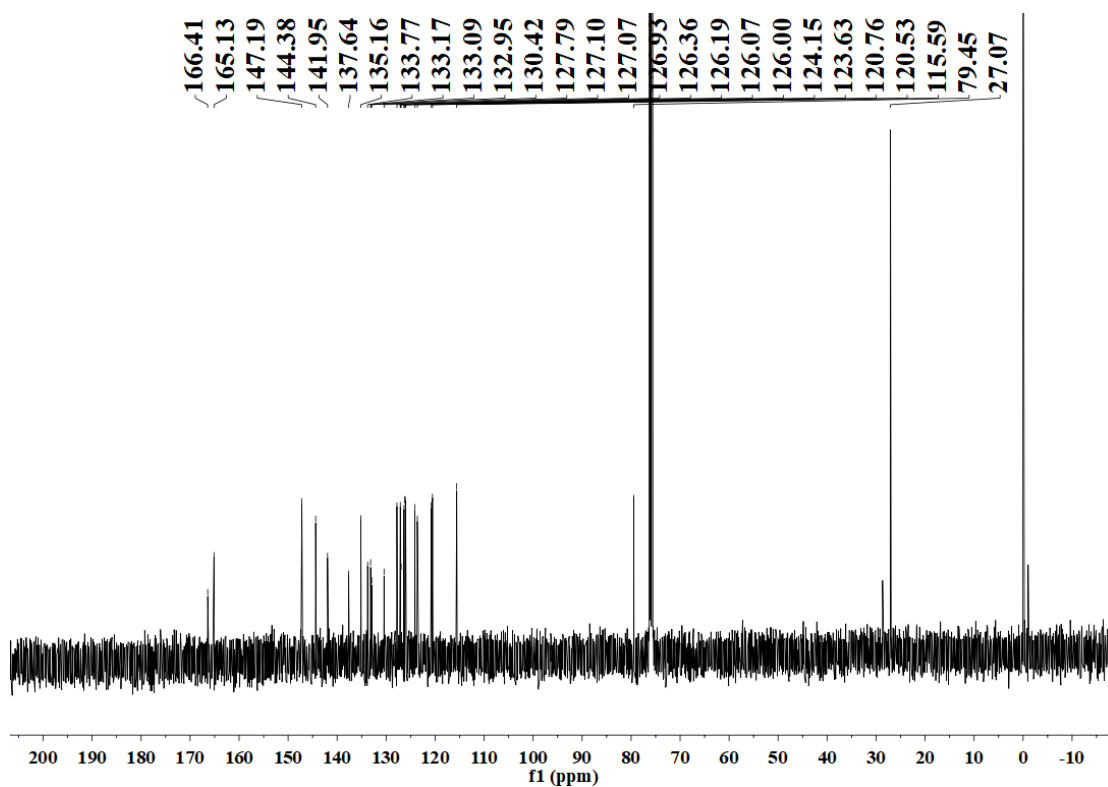

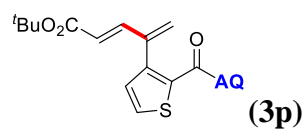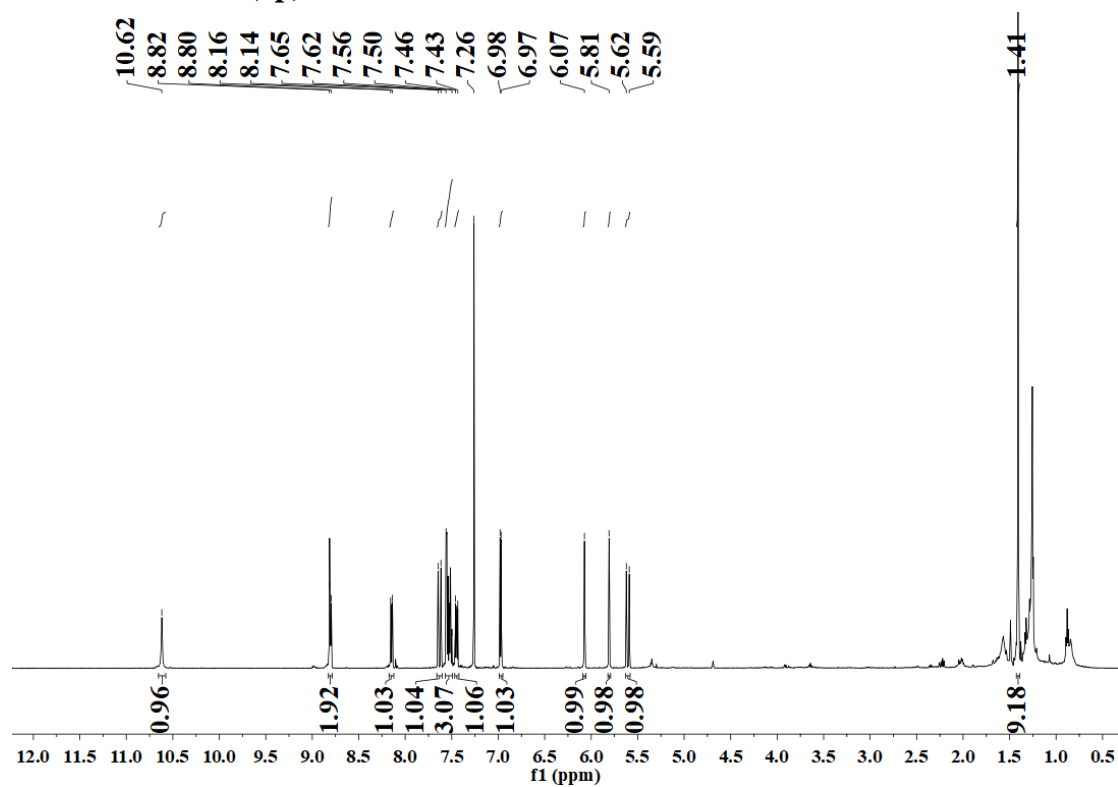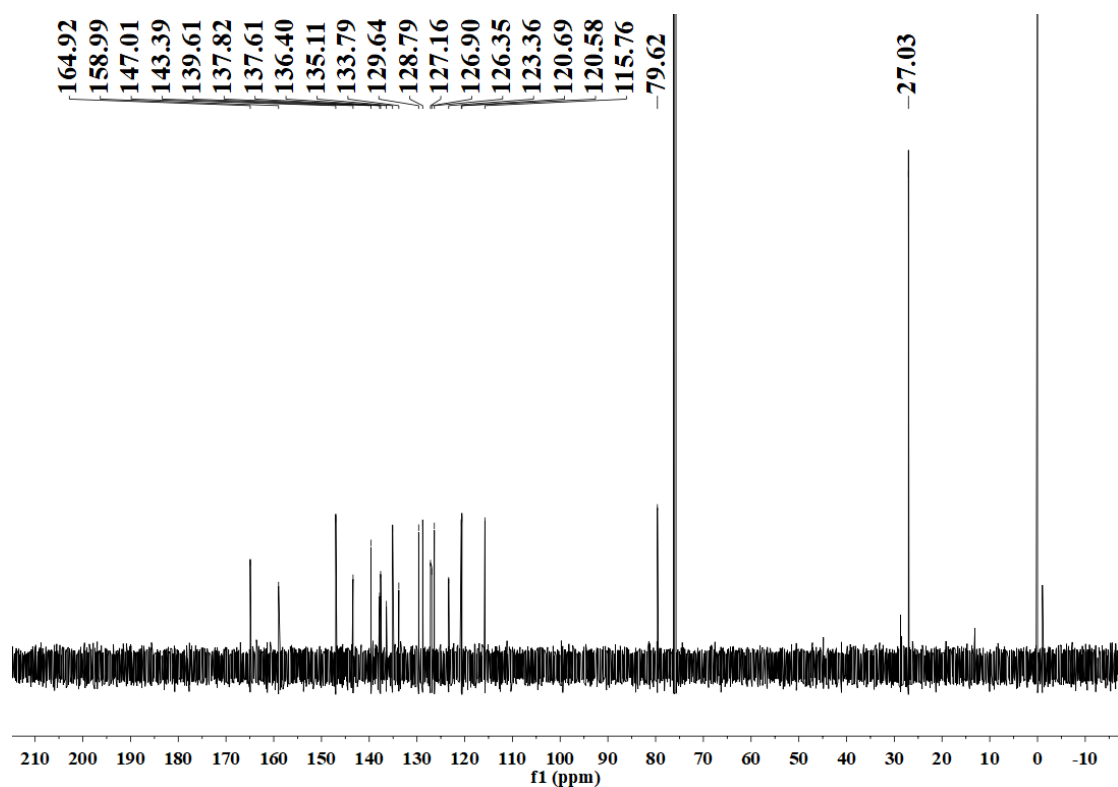

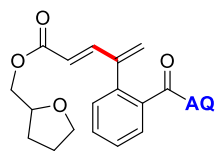

(3q)

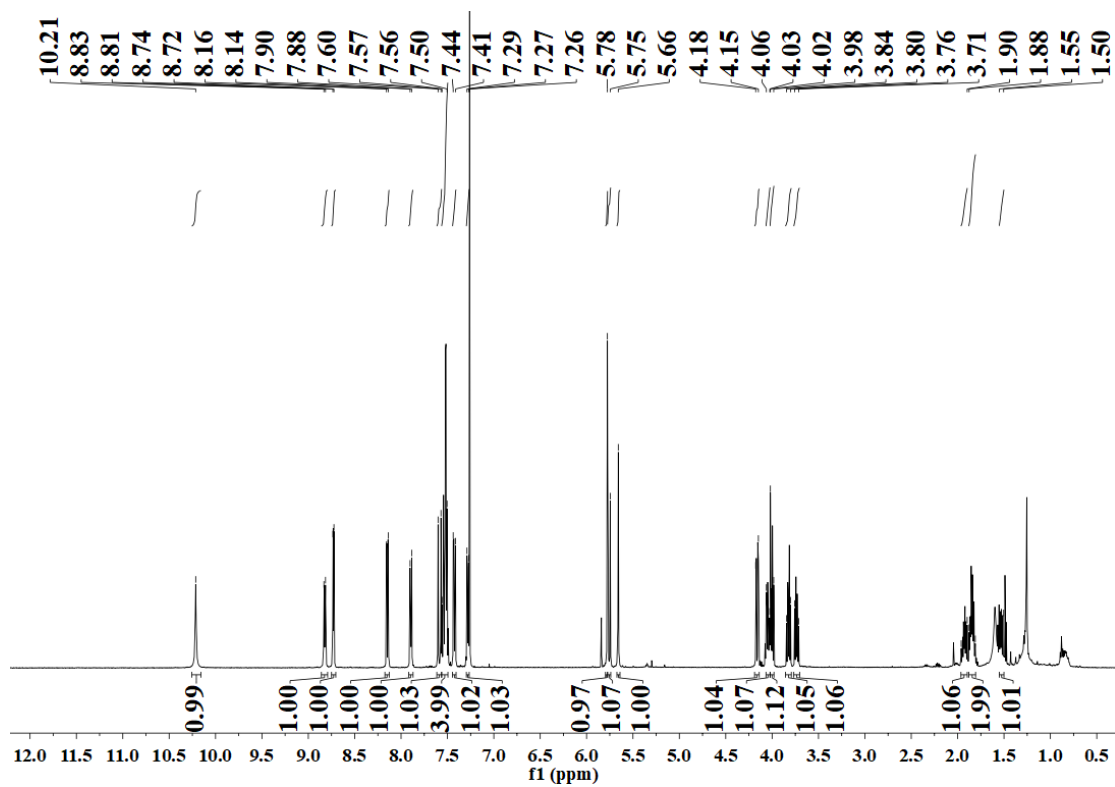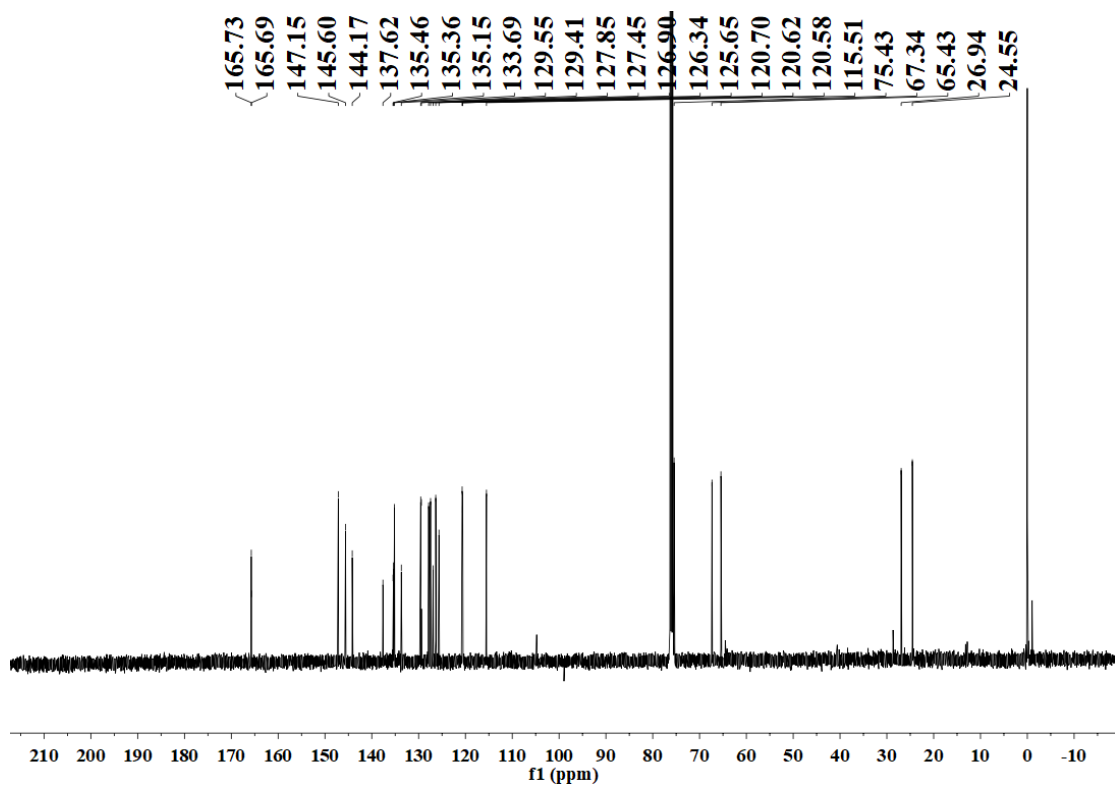

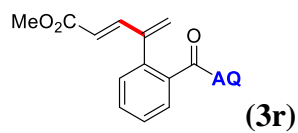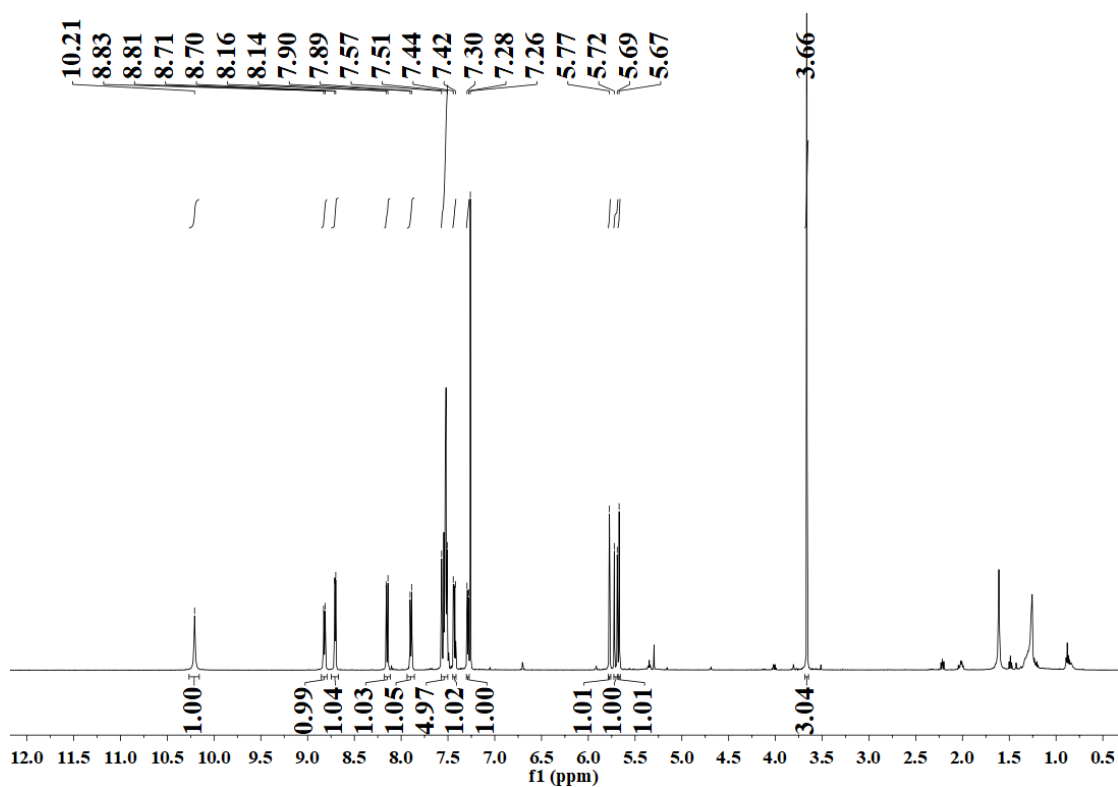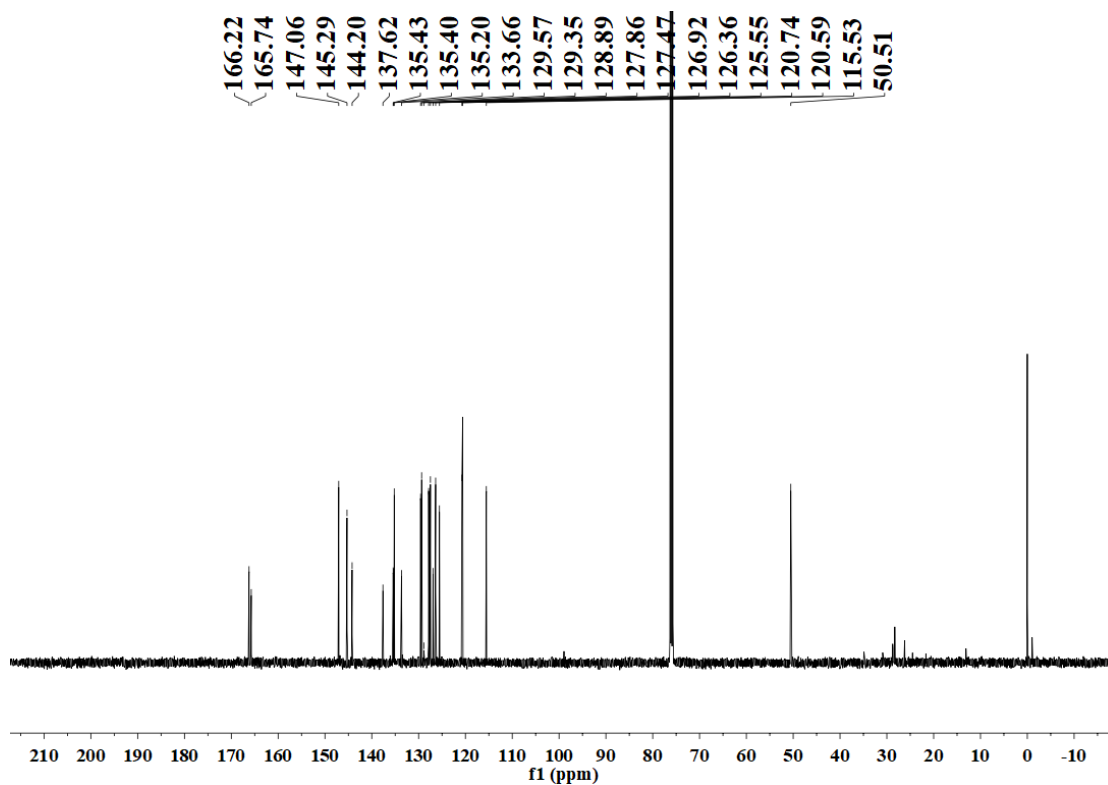



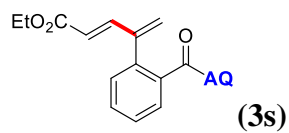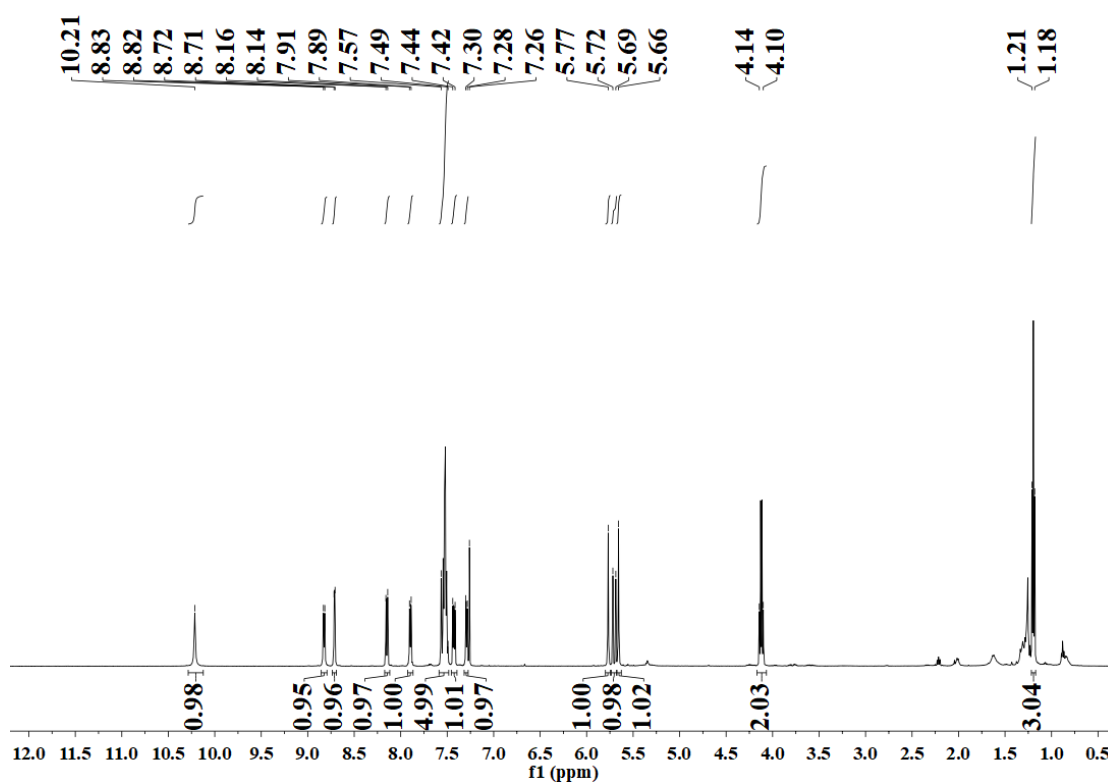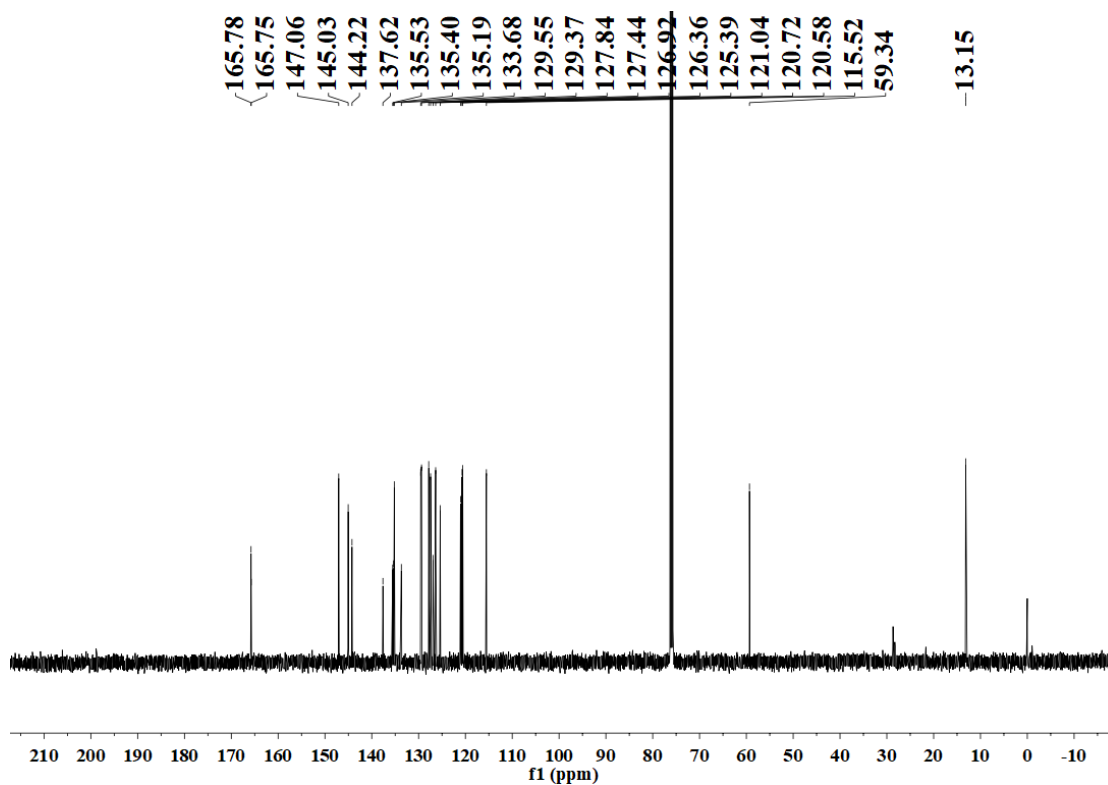

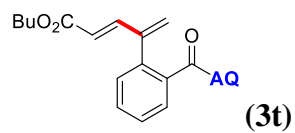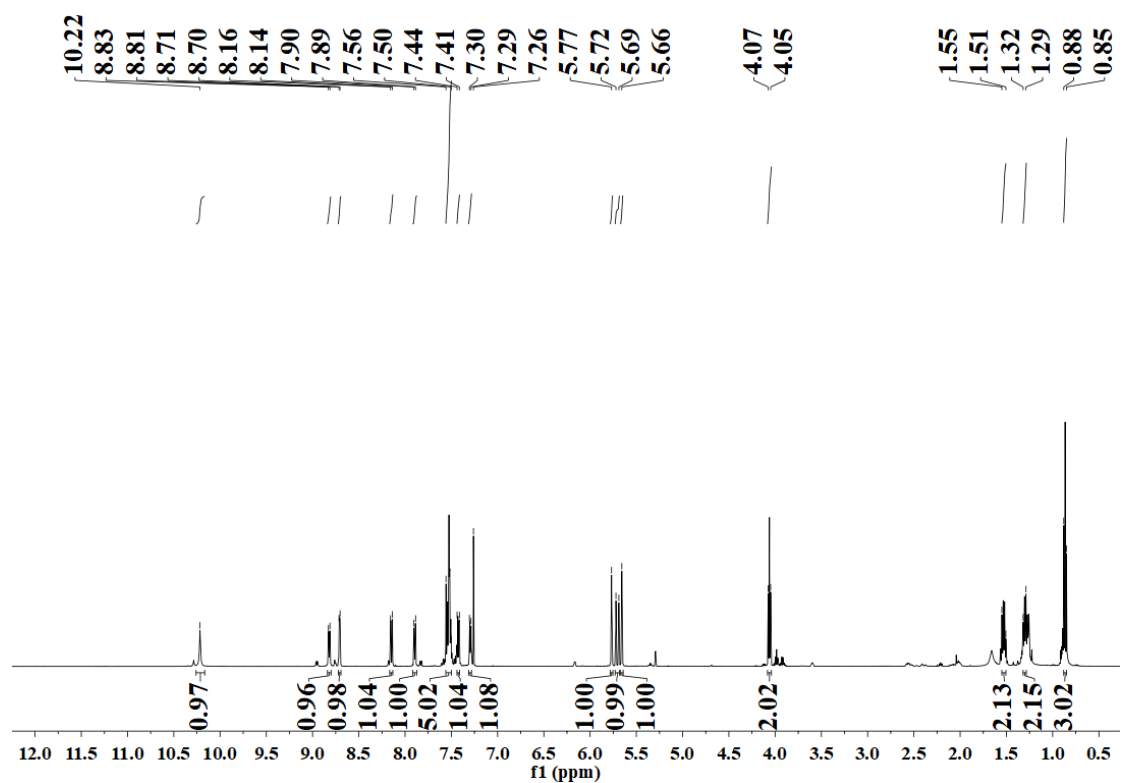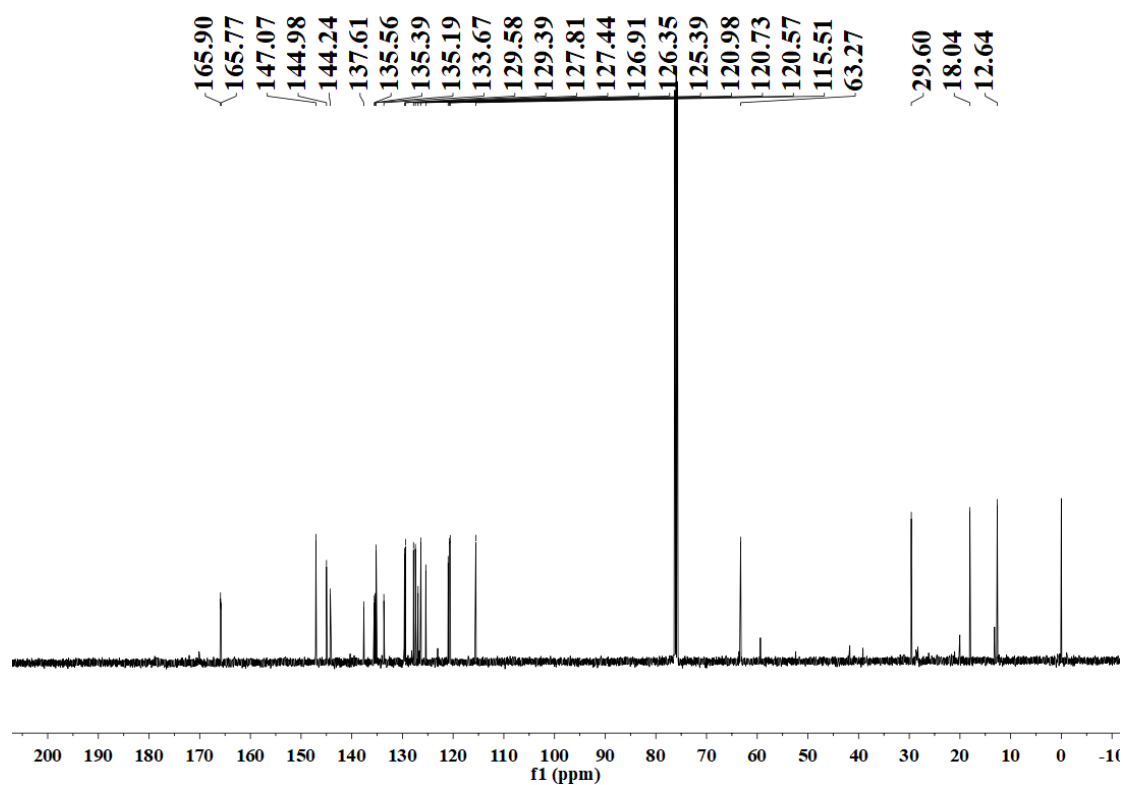

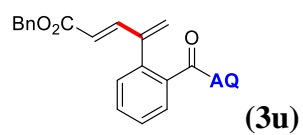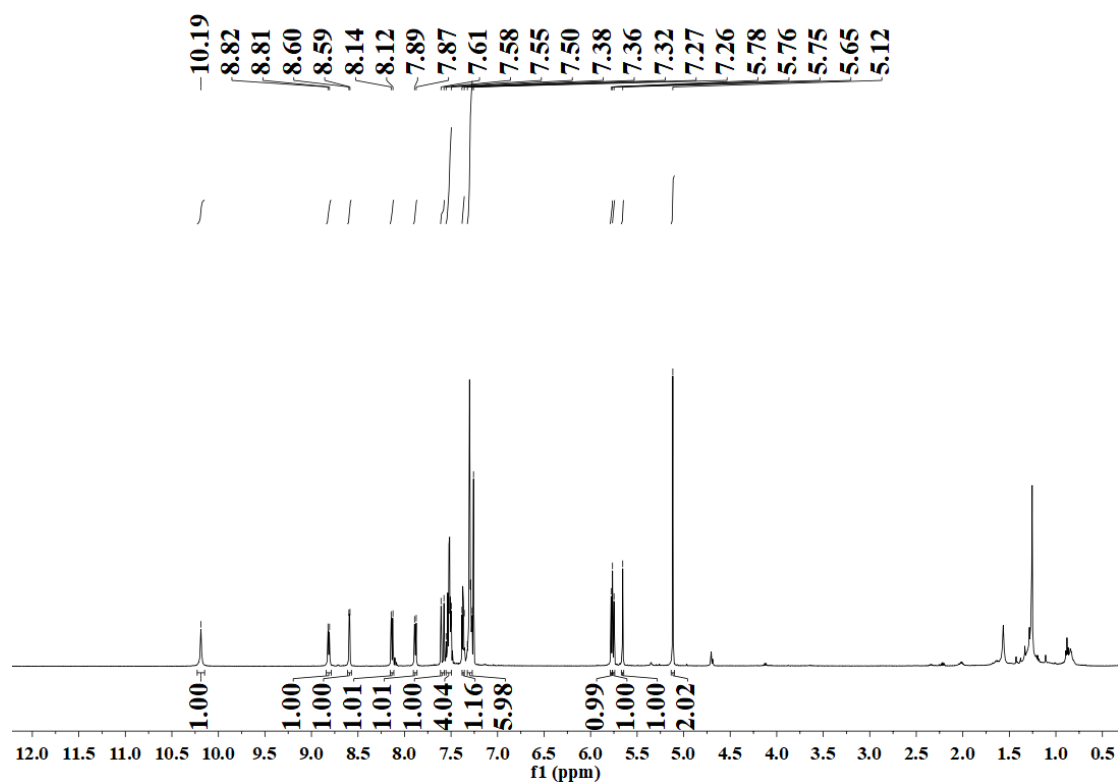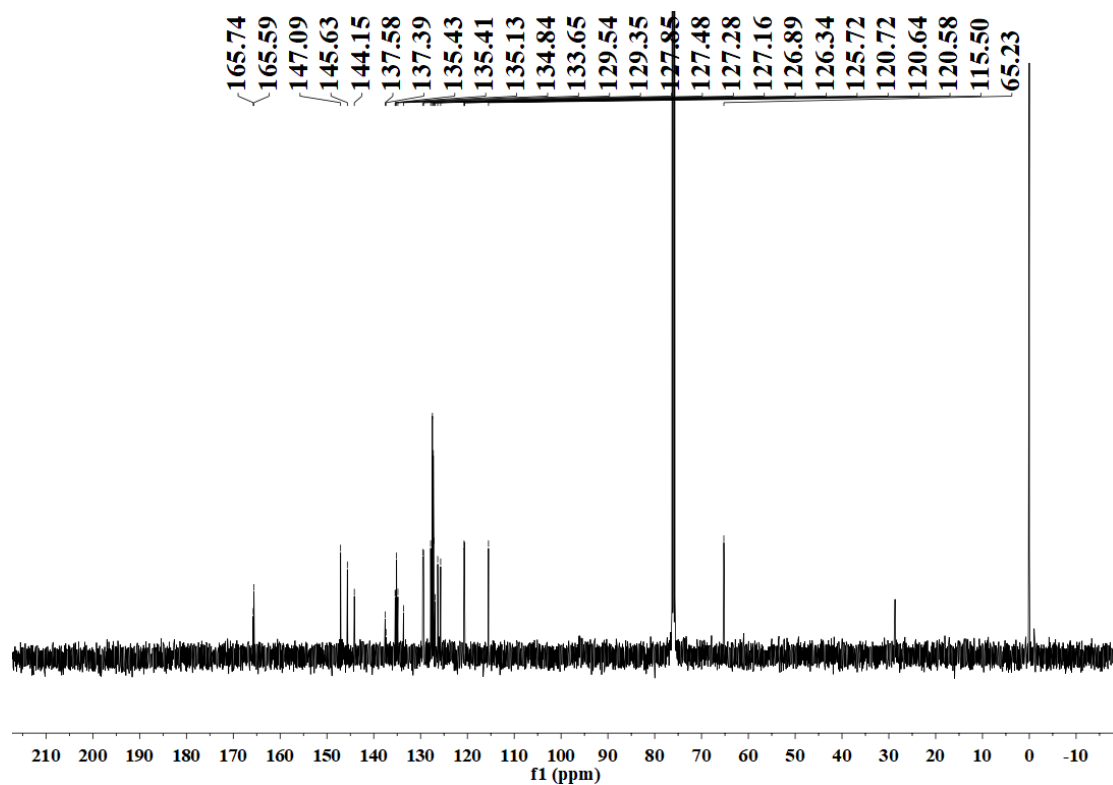

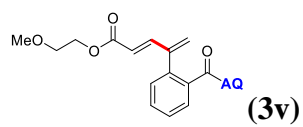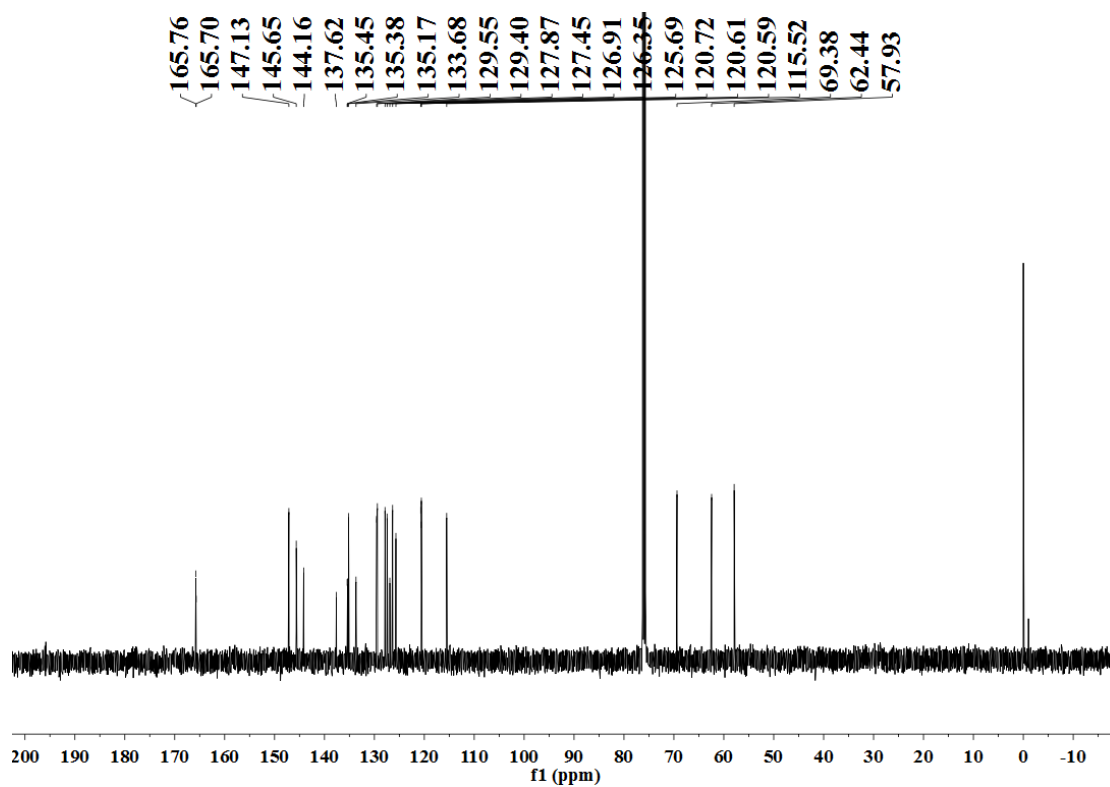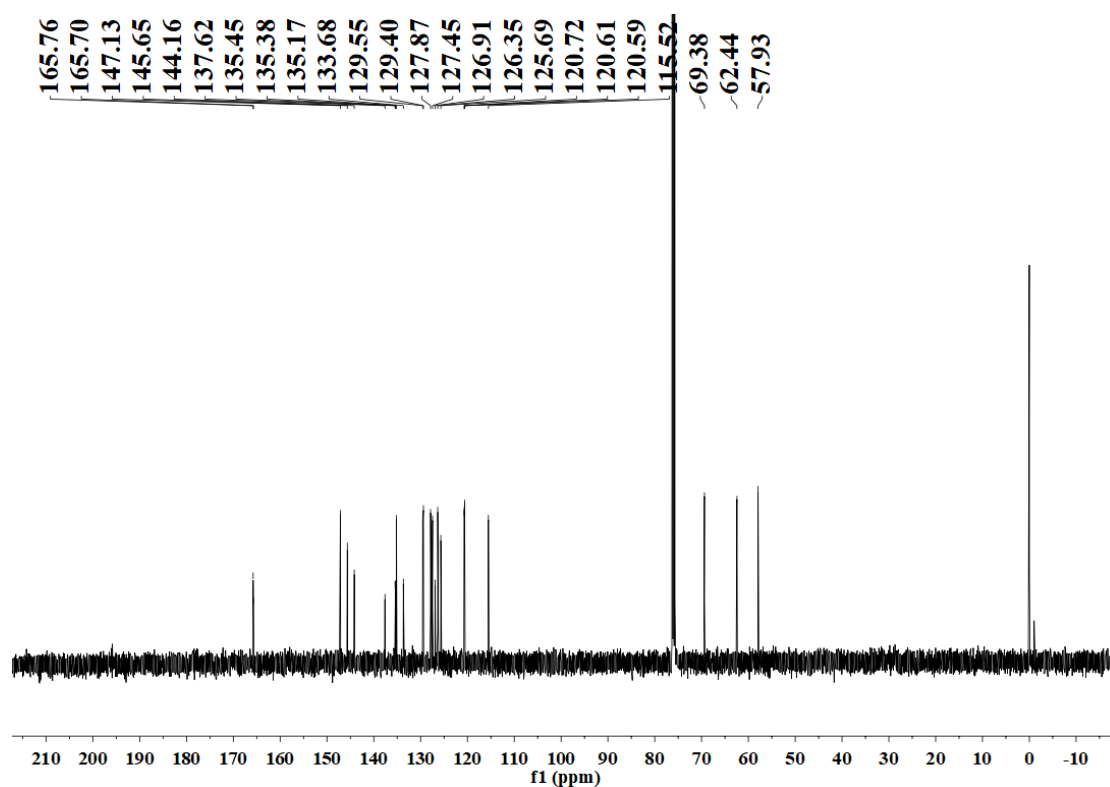

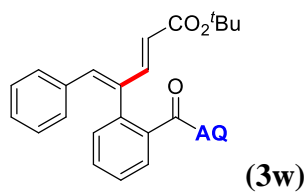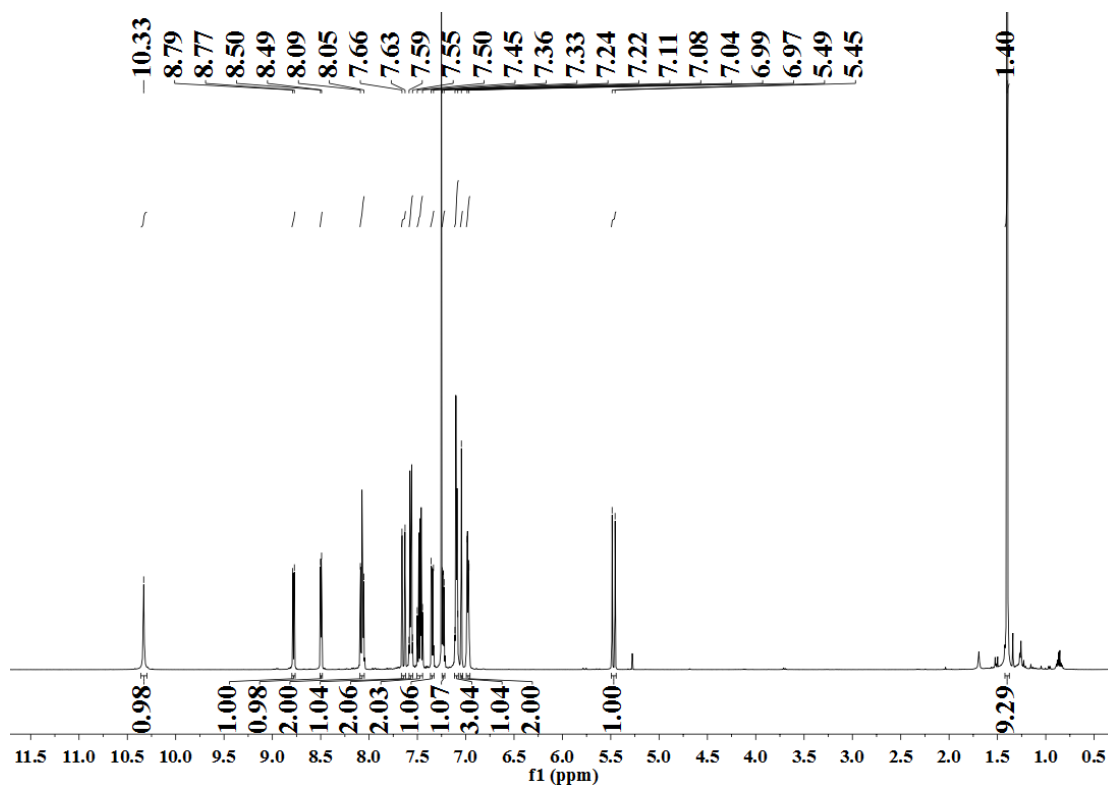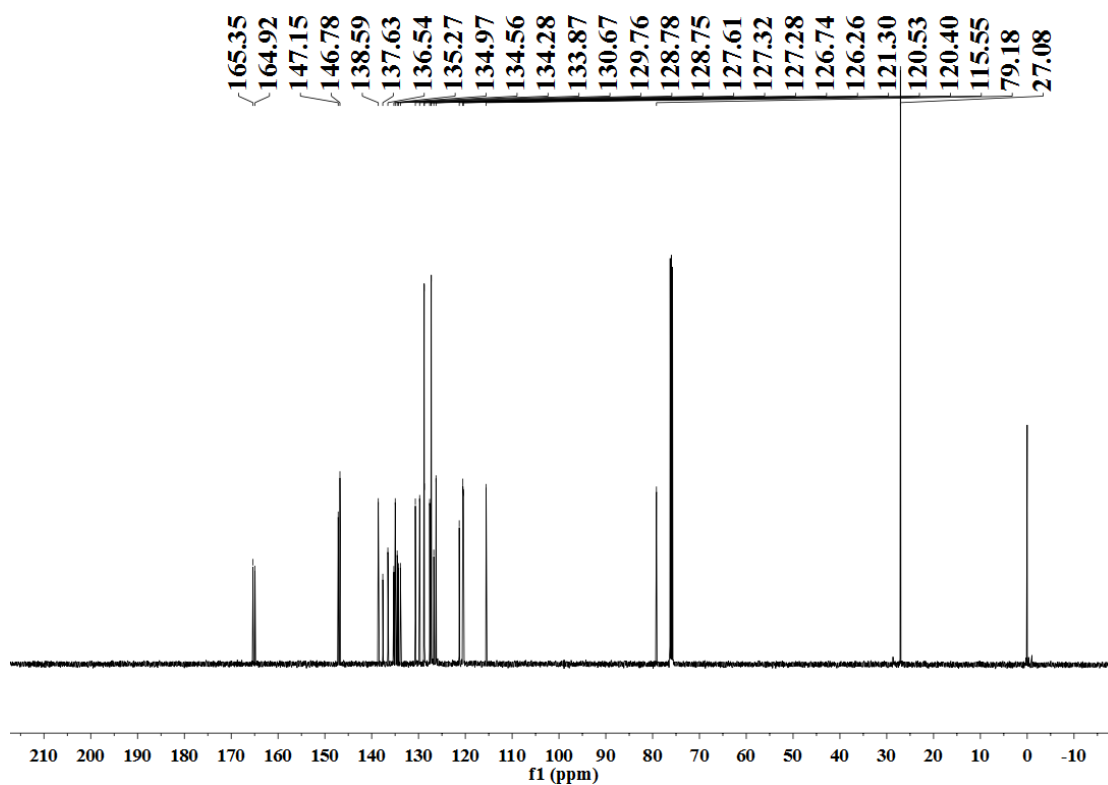

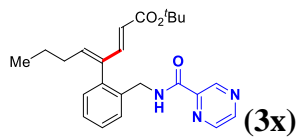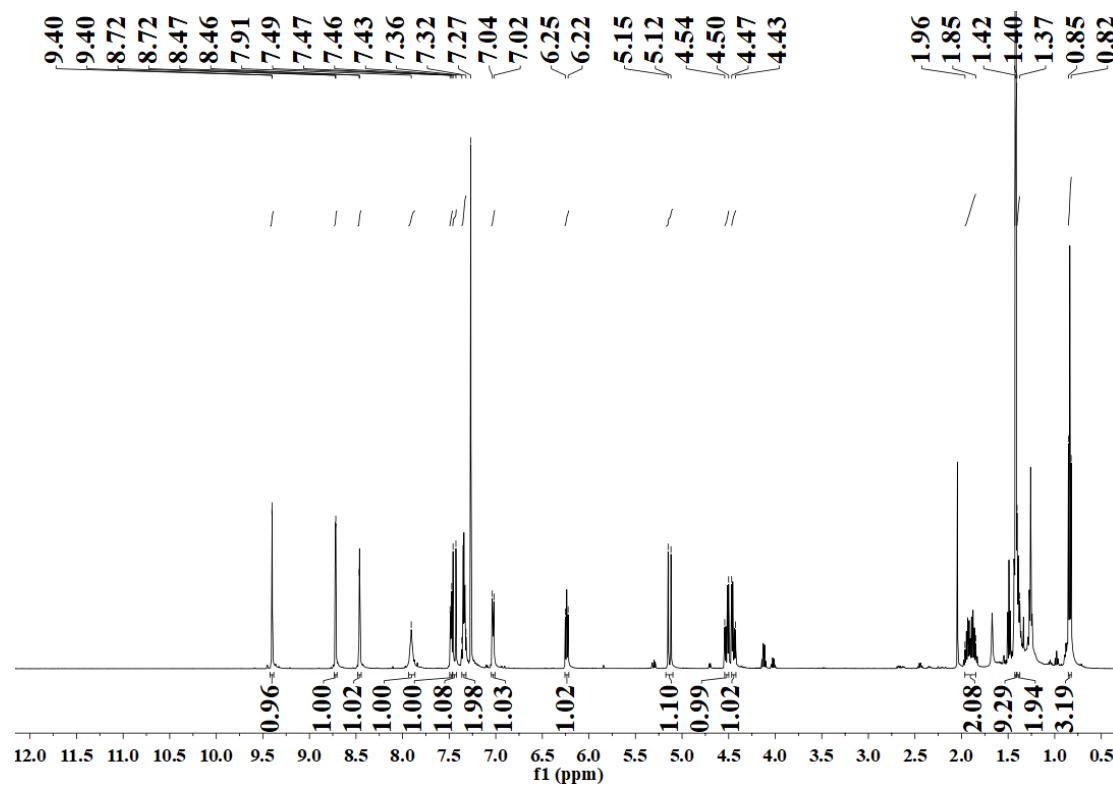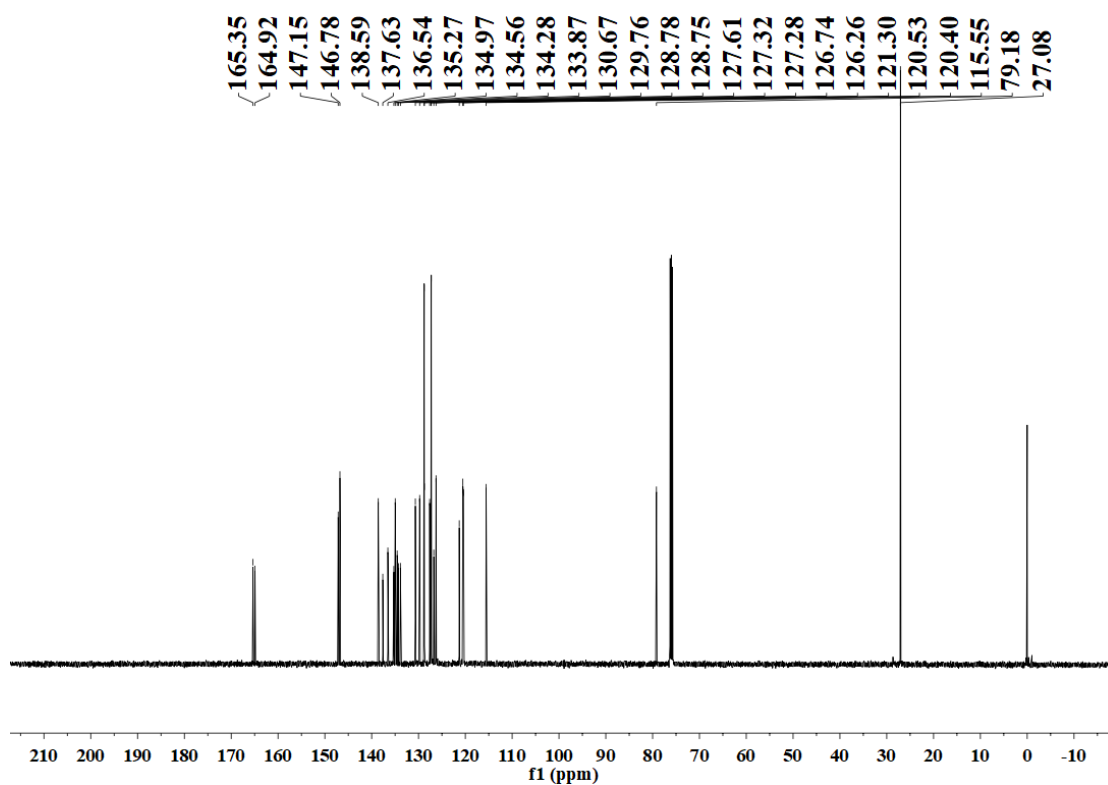

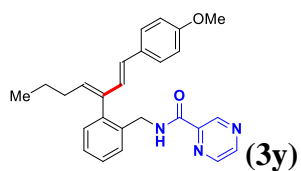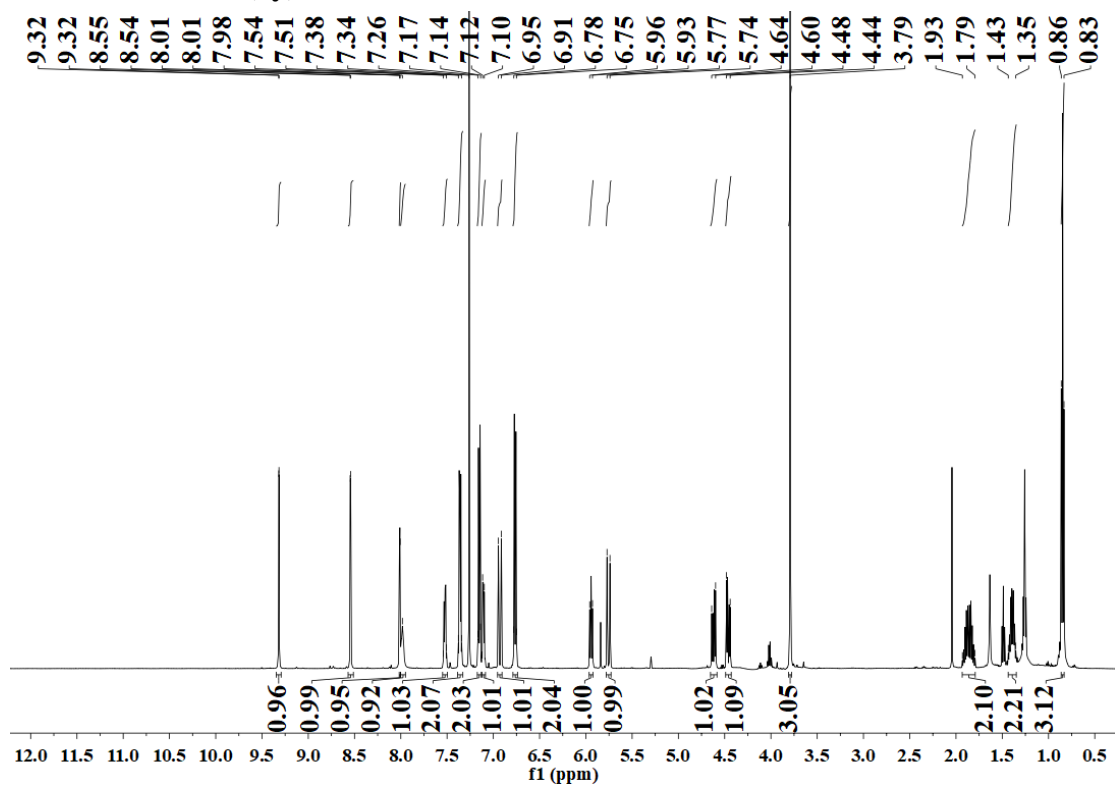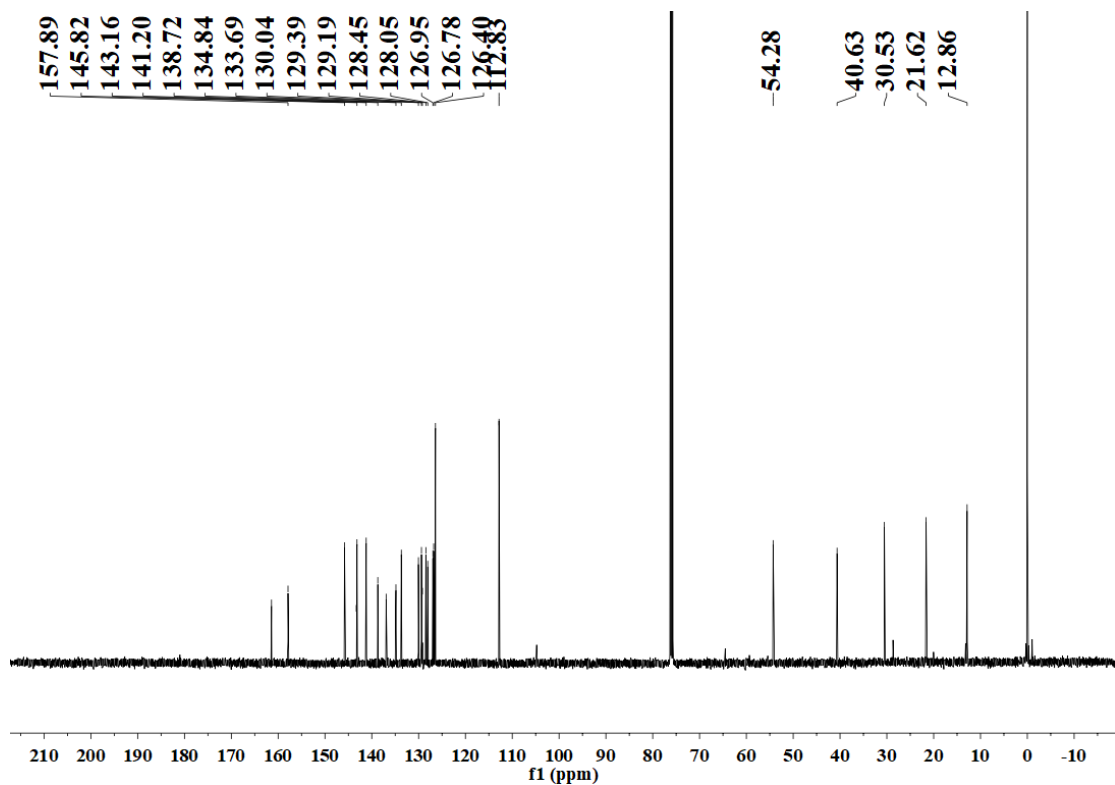

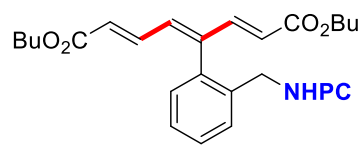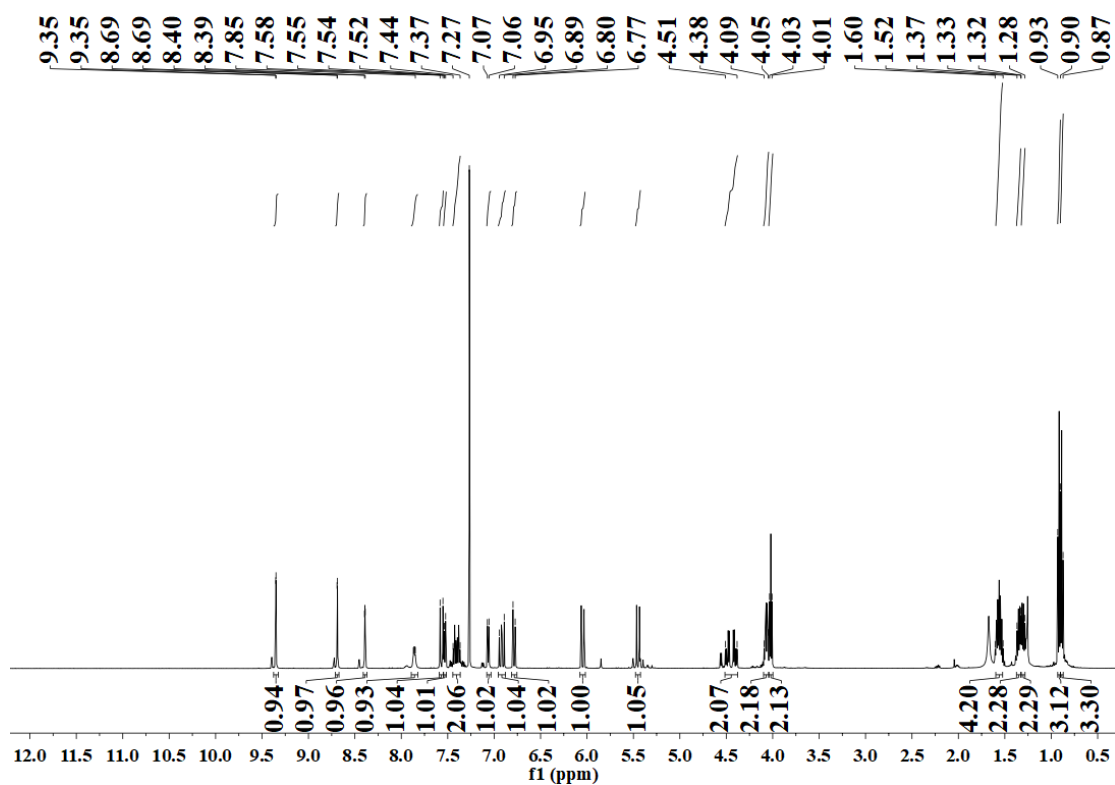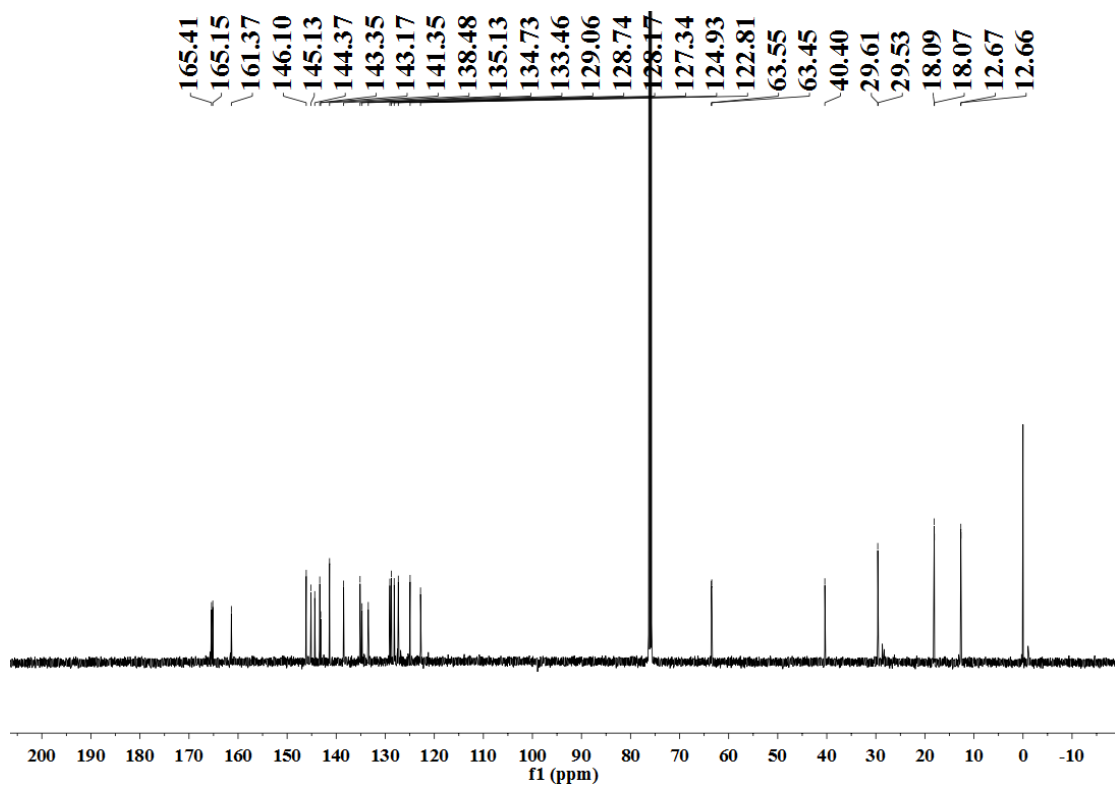



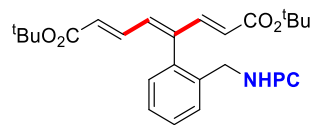

(5b)

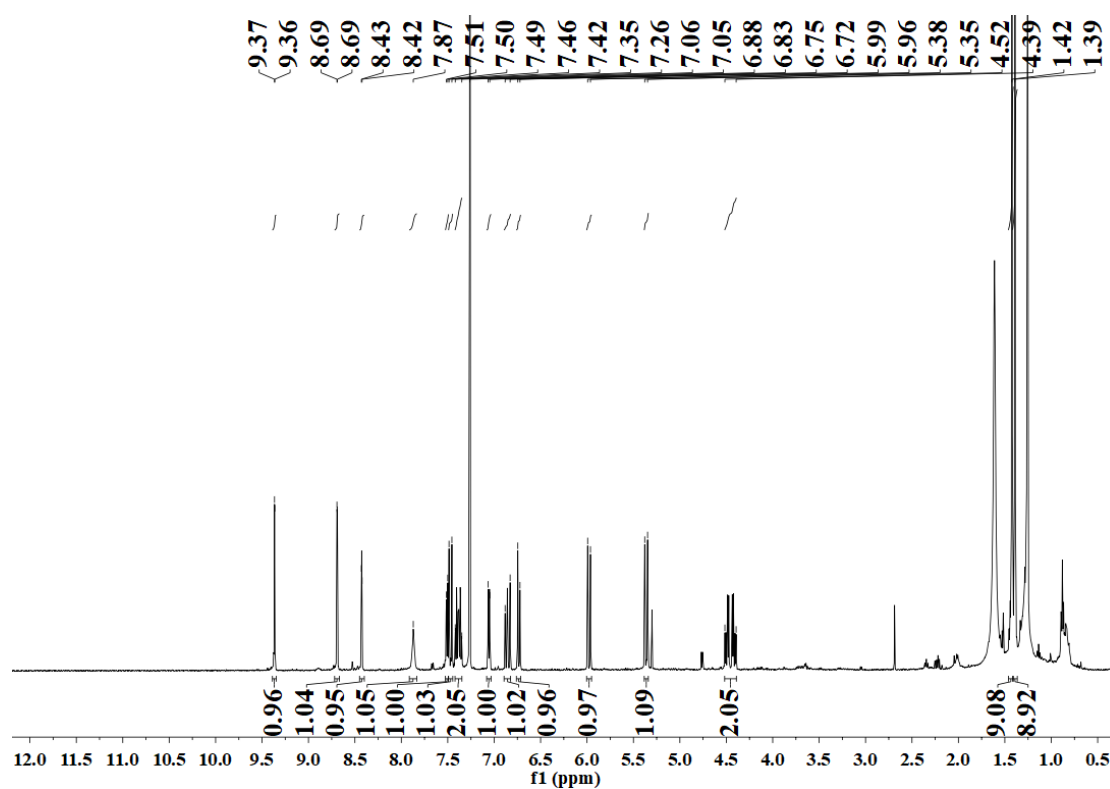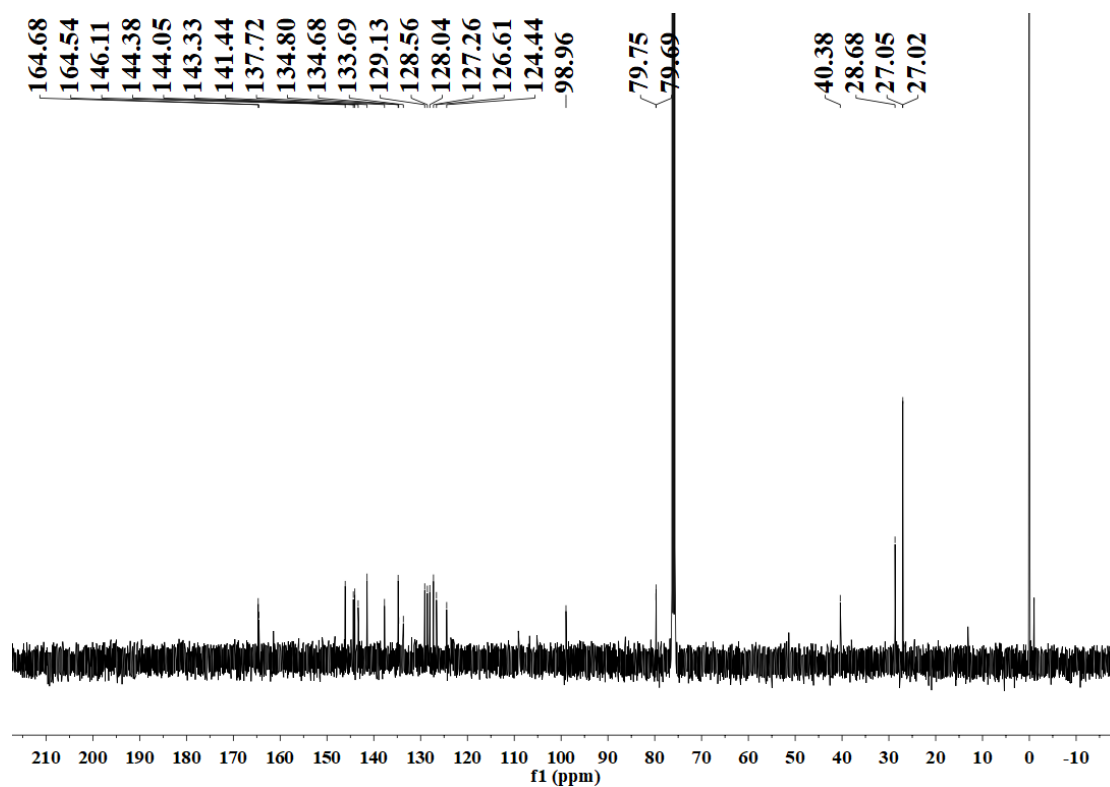

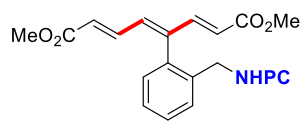

(5c)

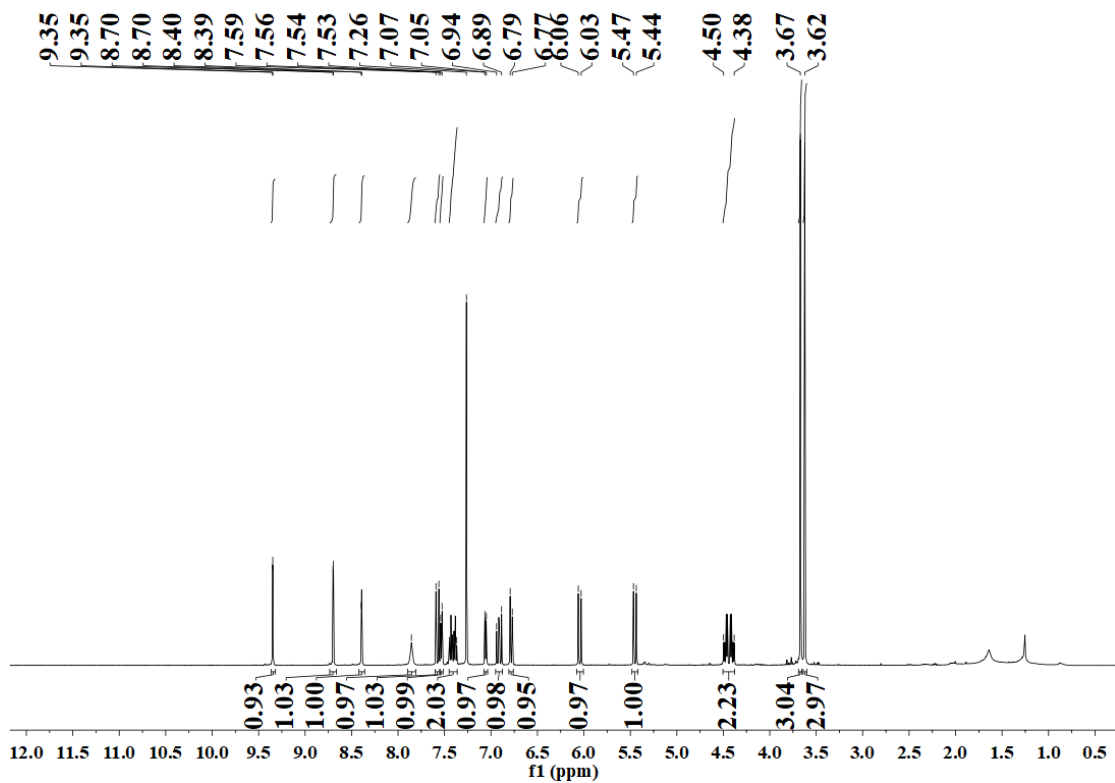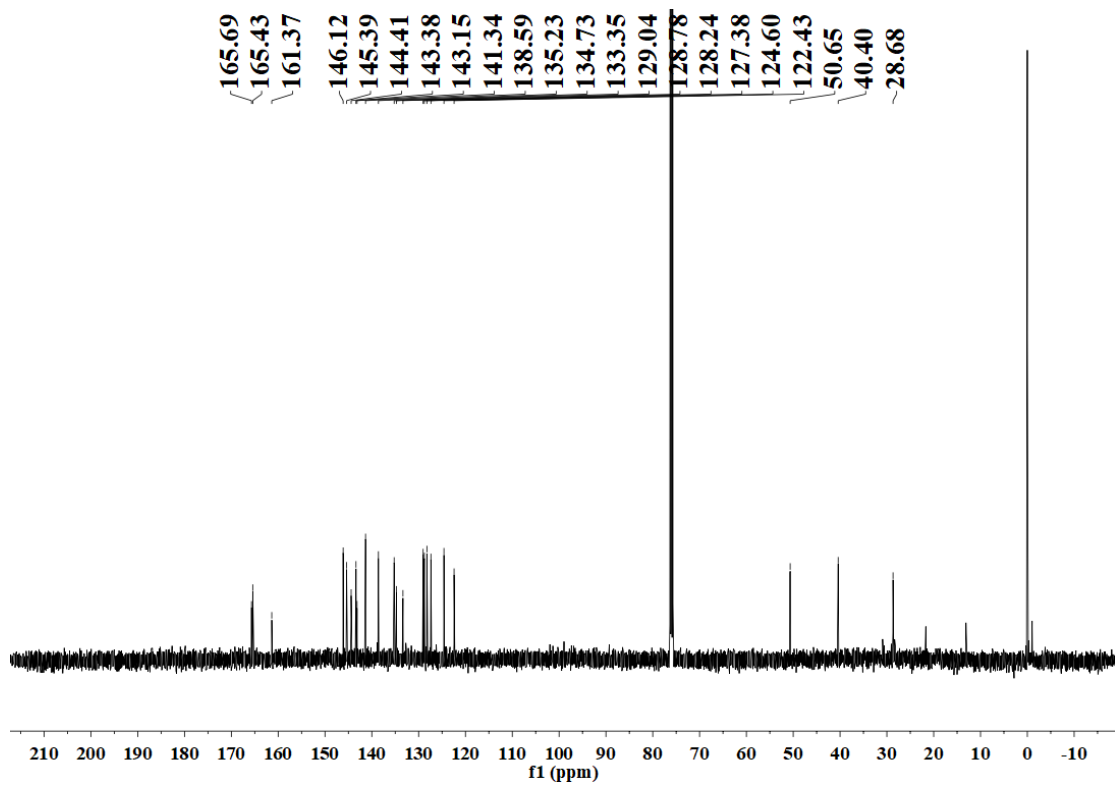

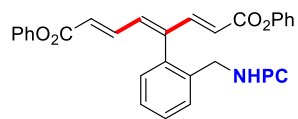

(5d)

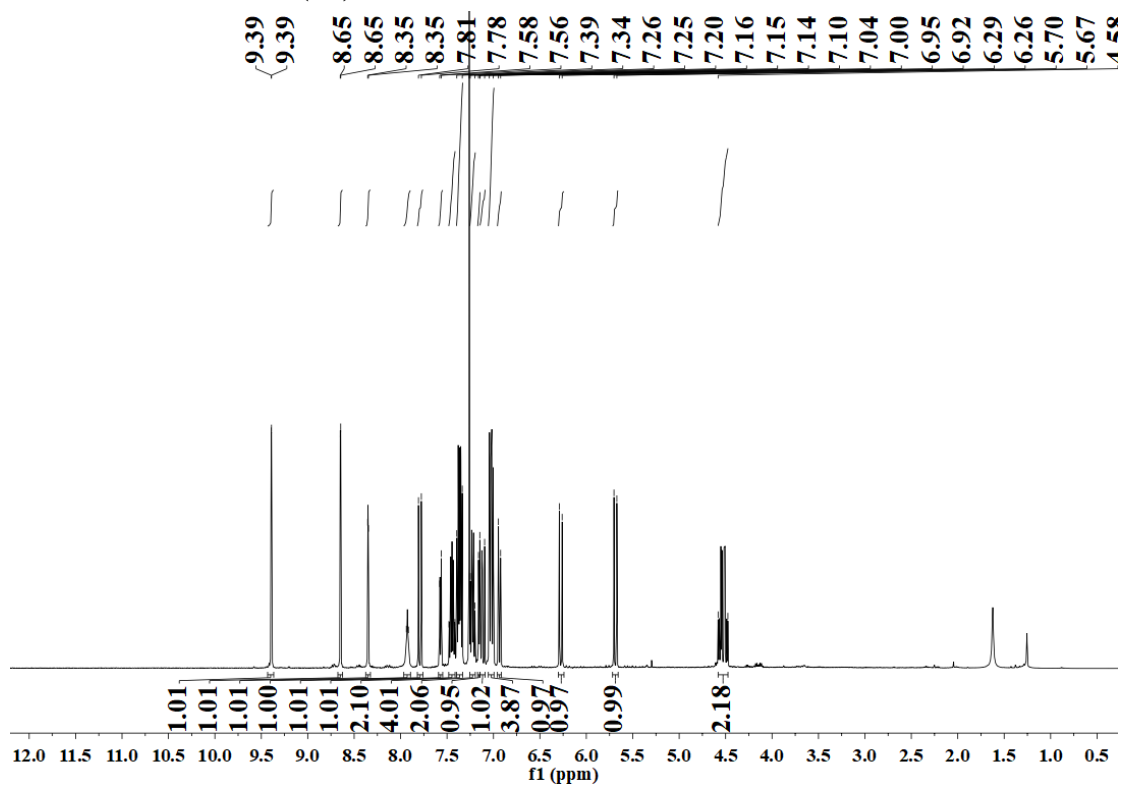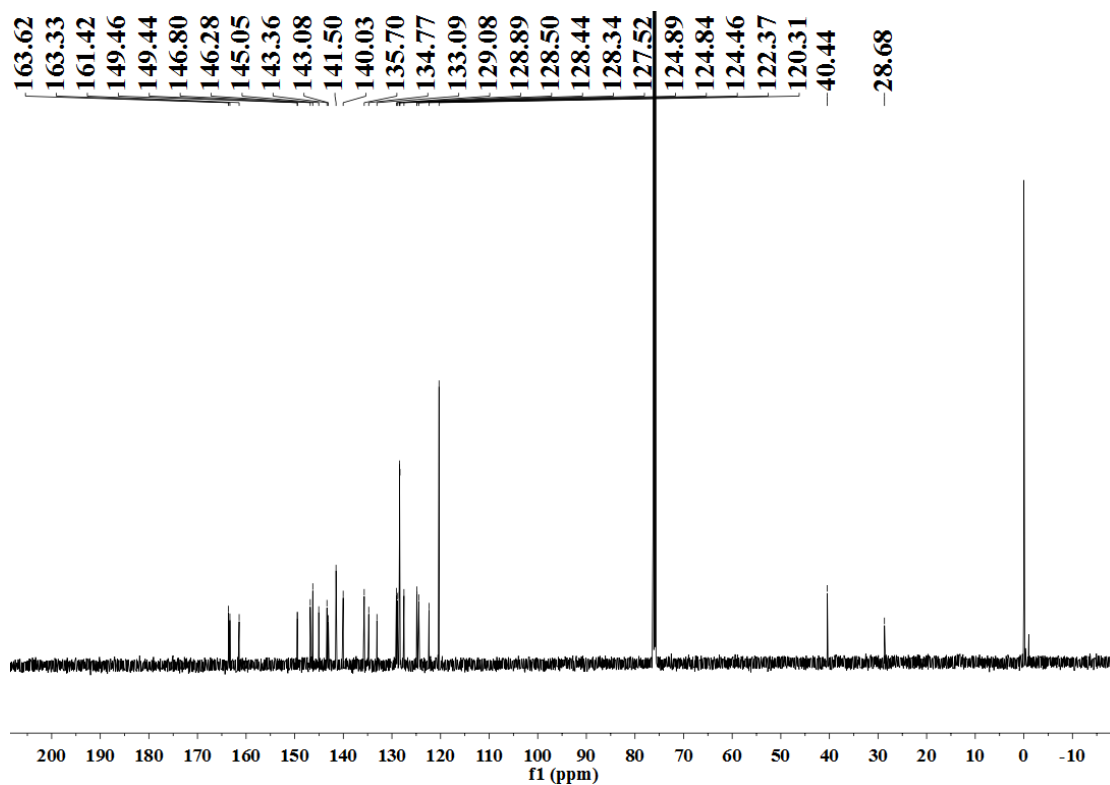

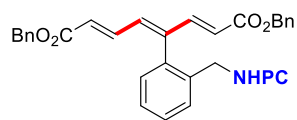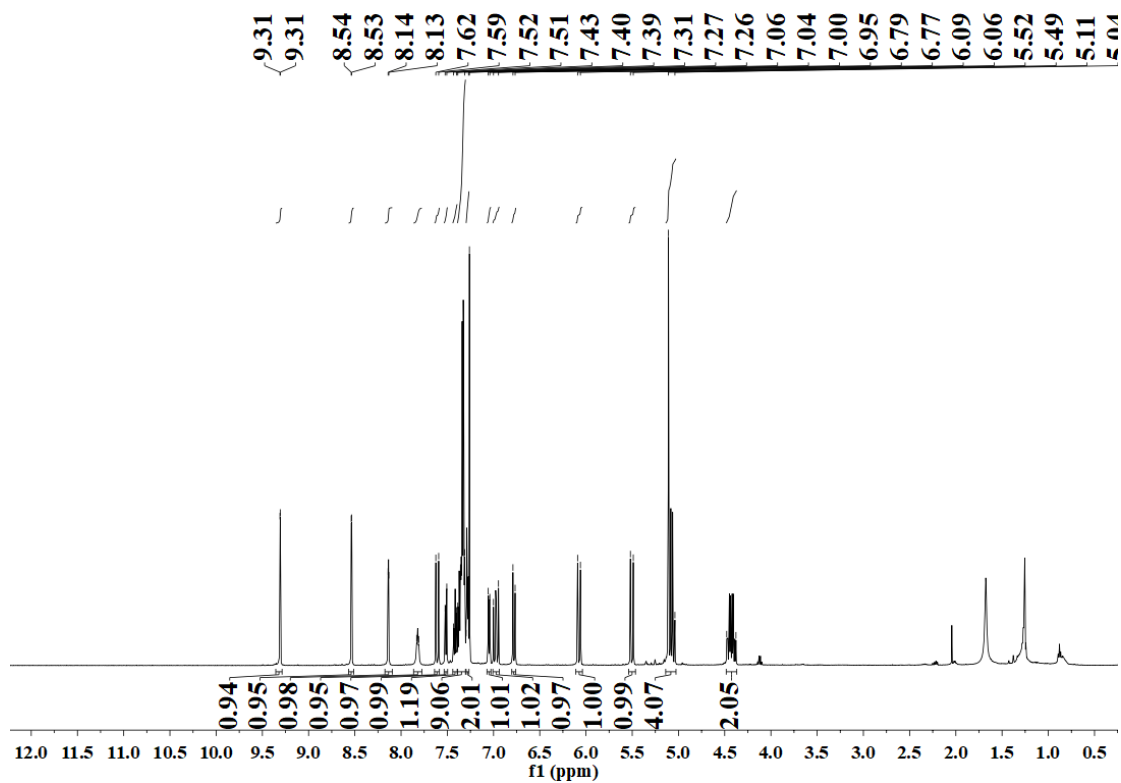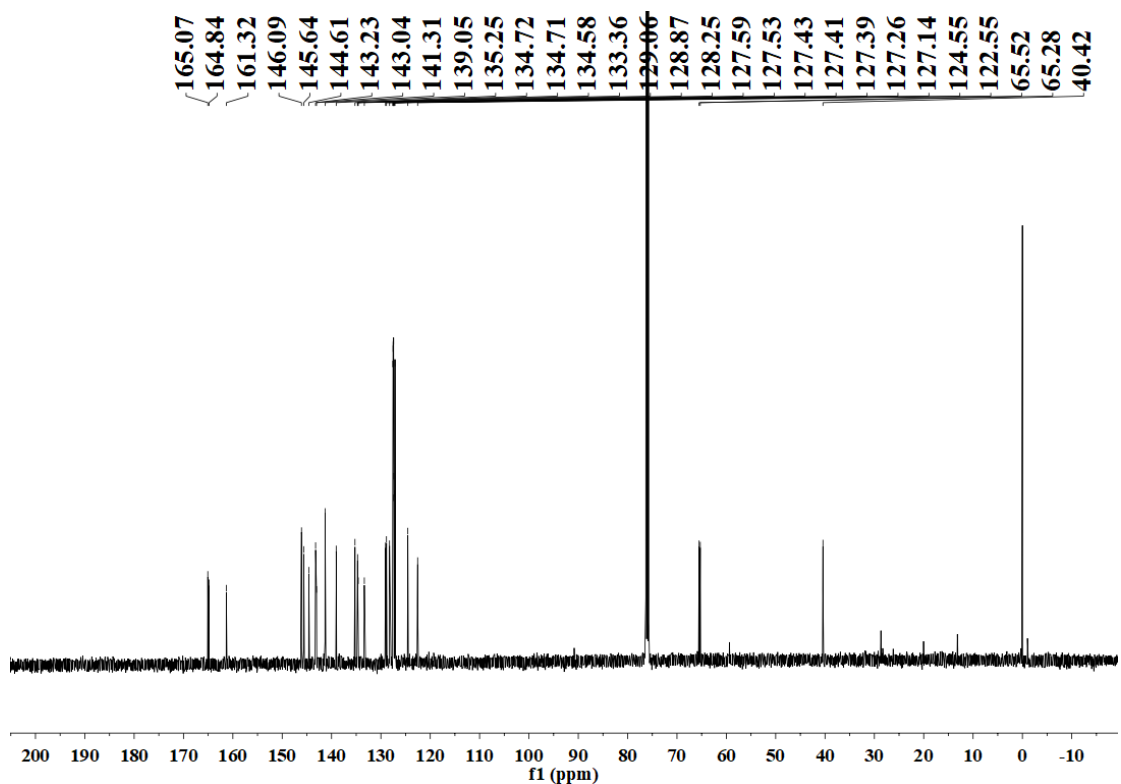

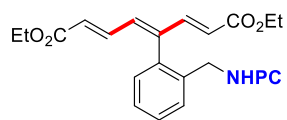

(5f)

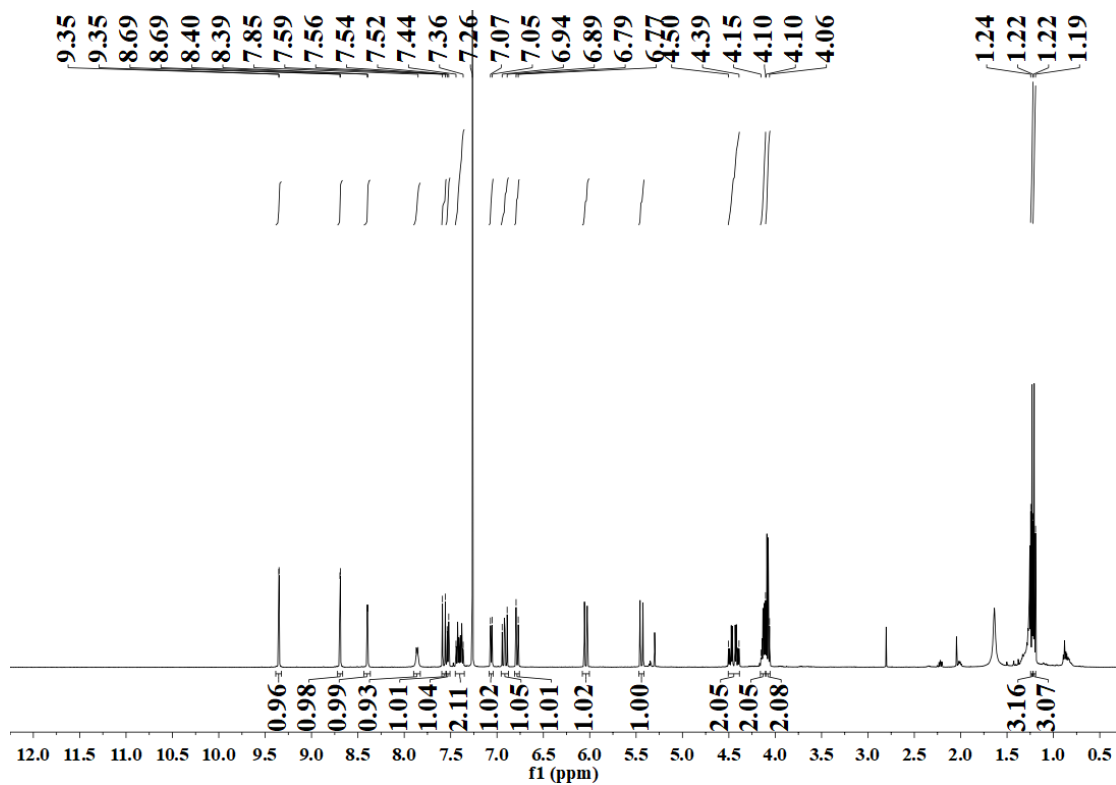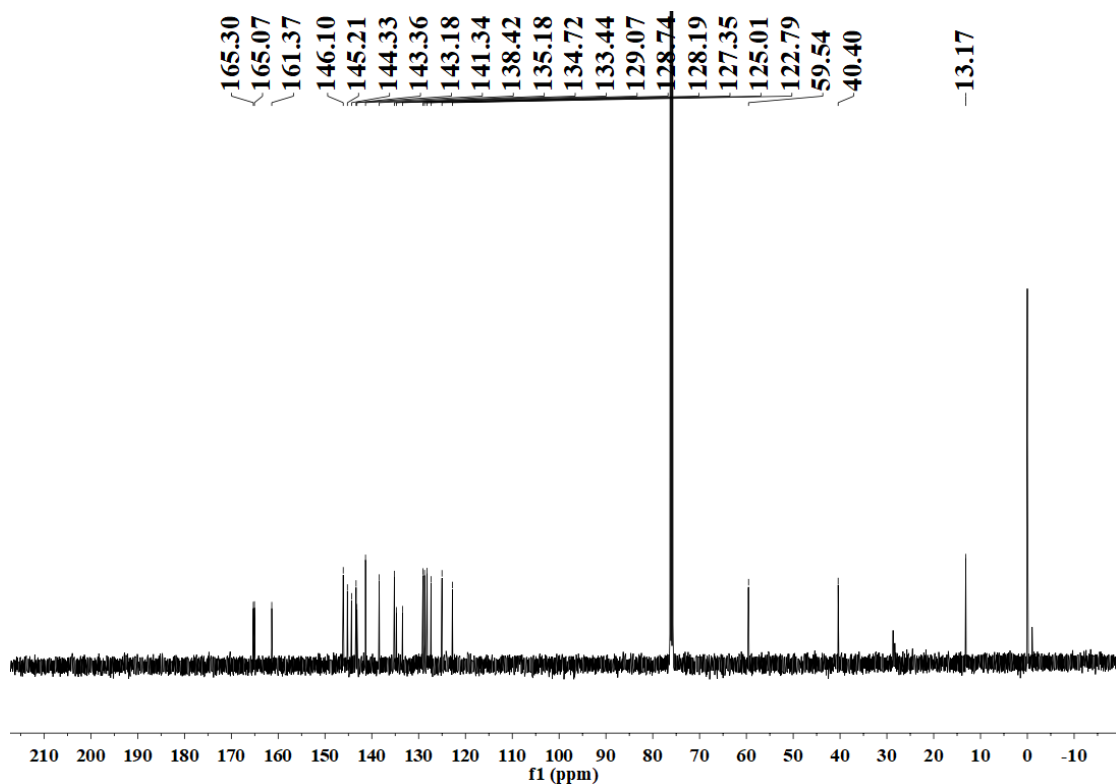

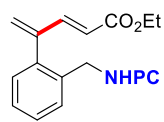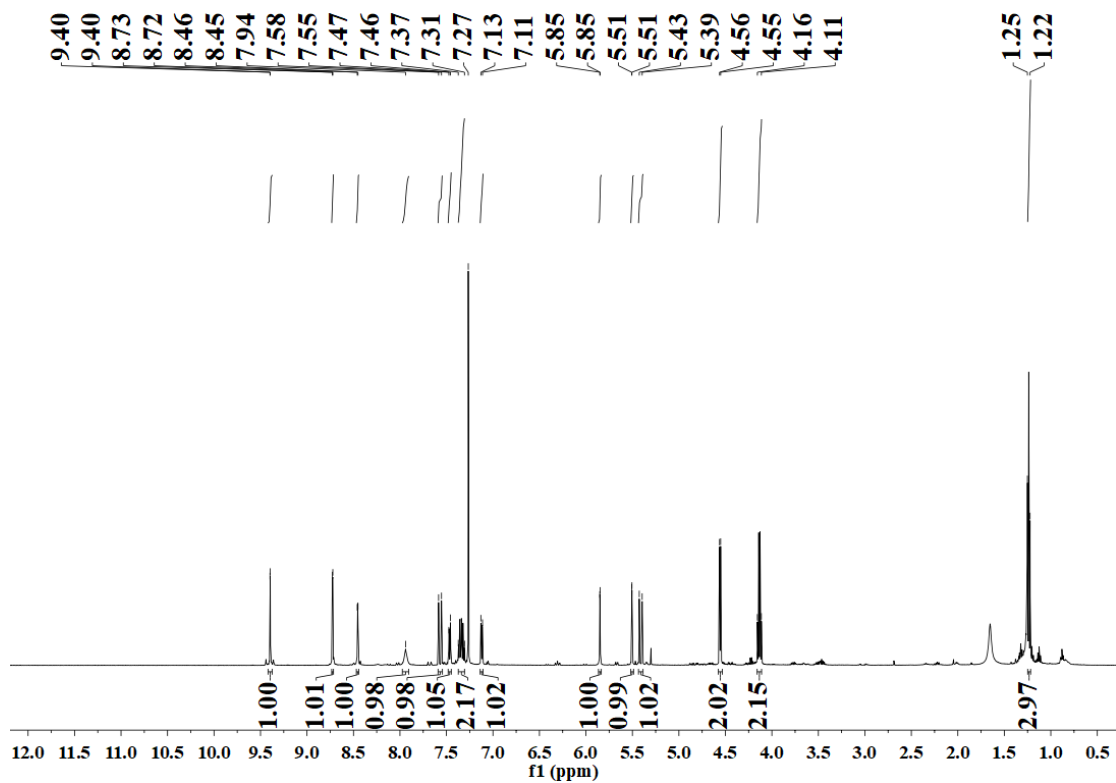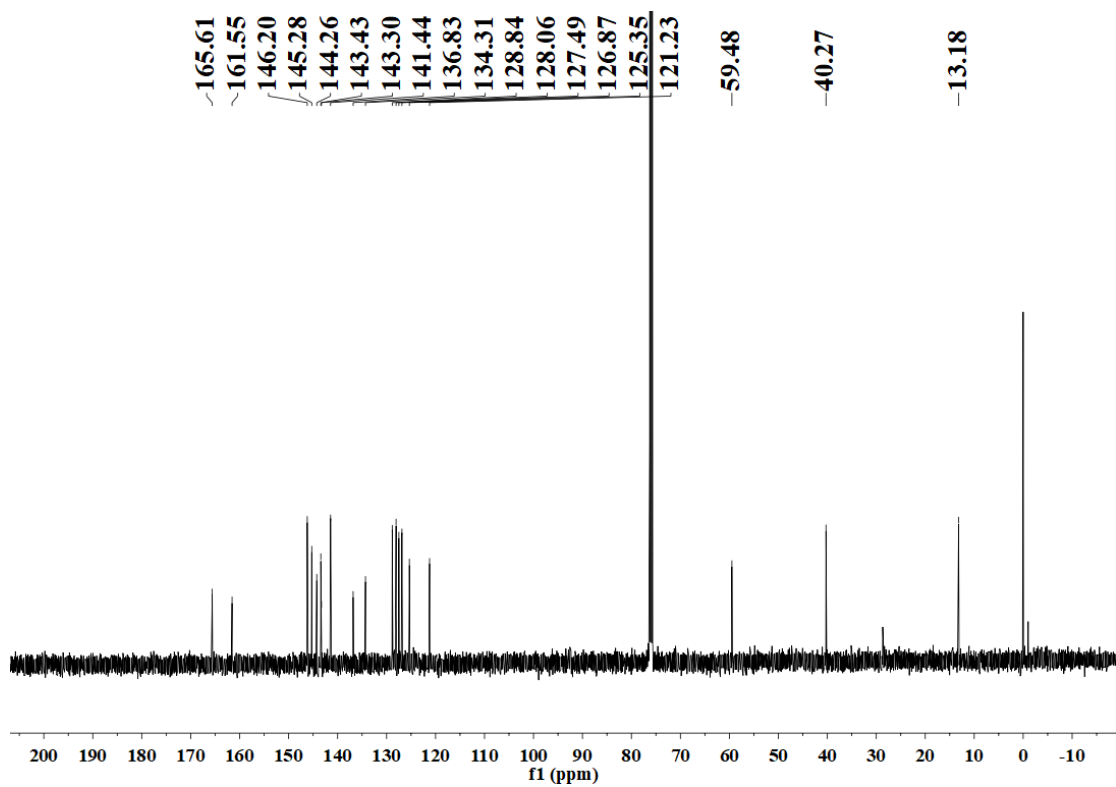

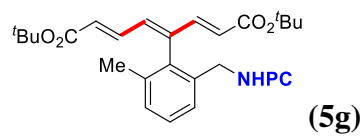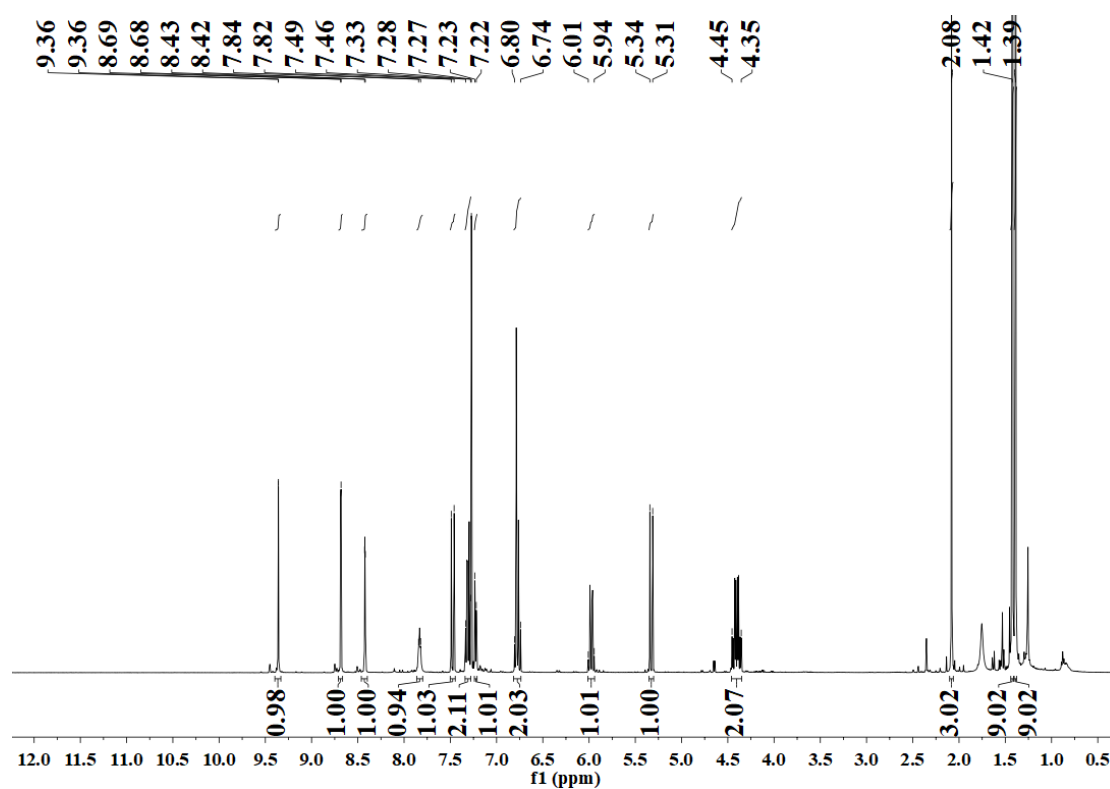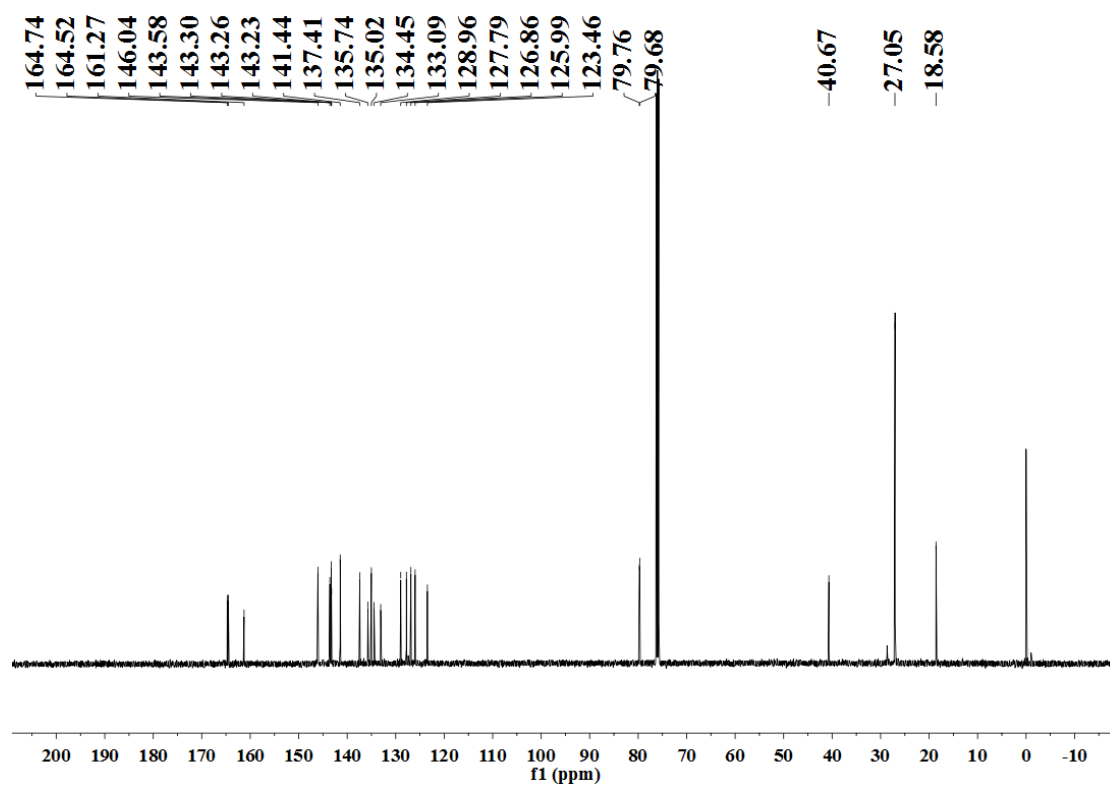

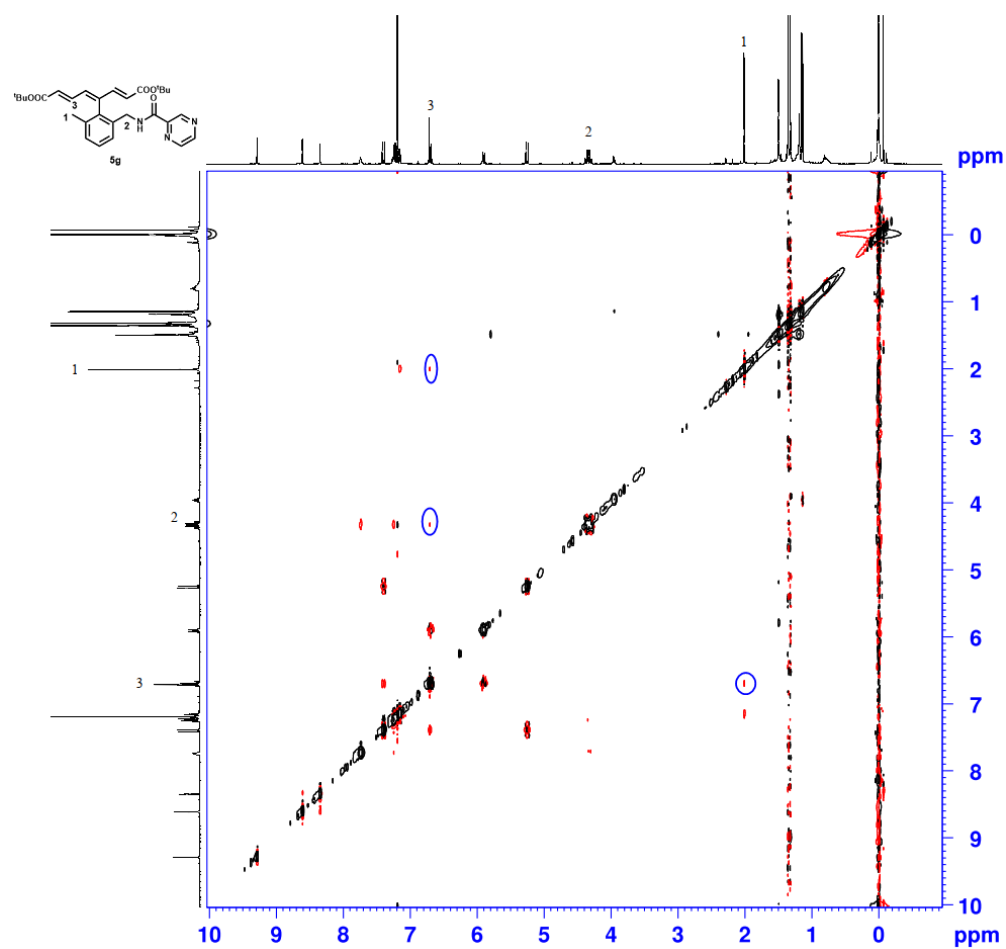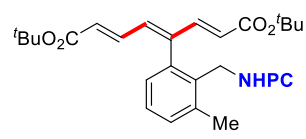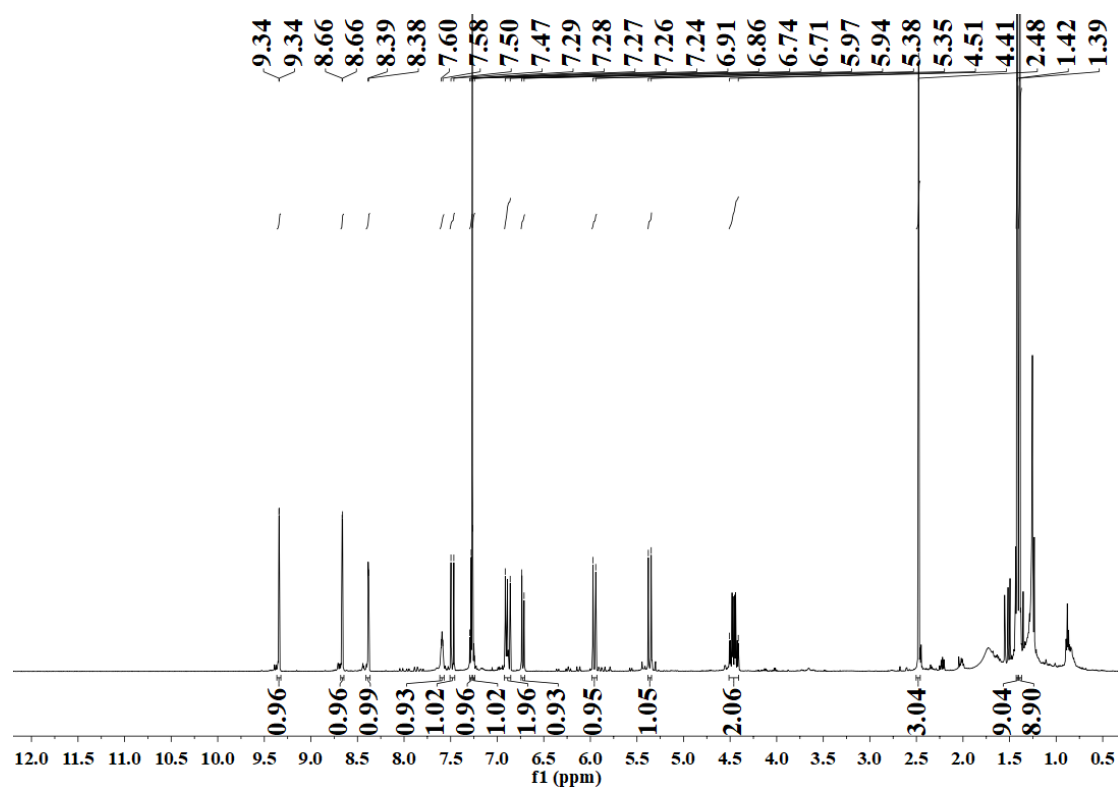



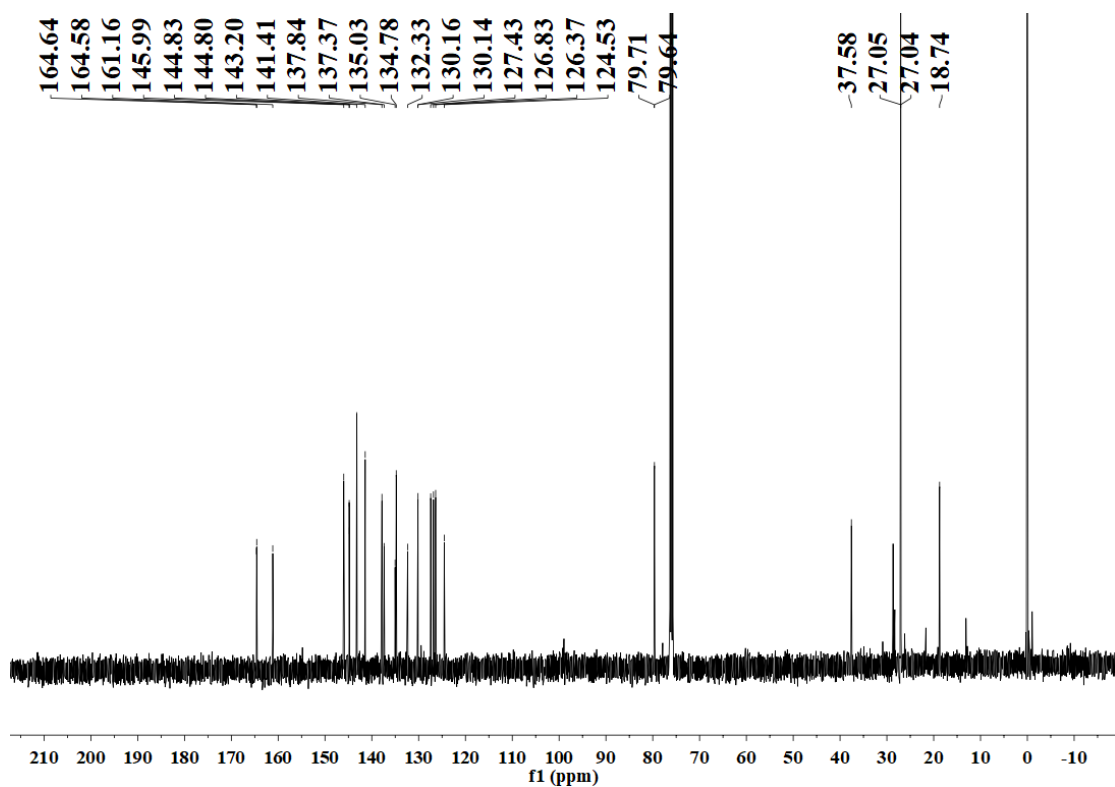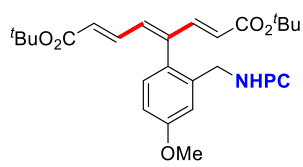

(5i)

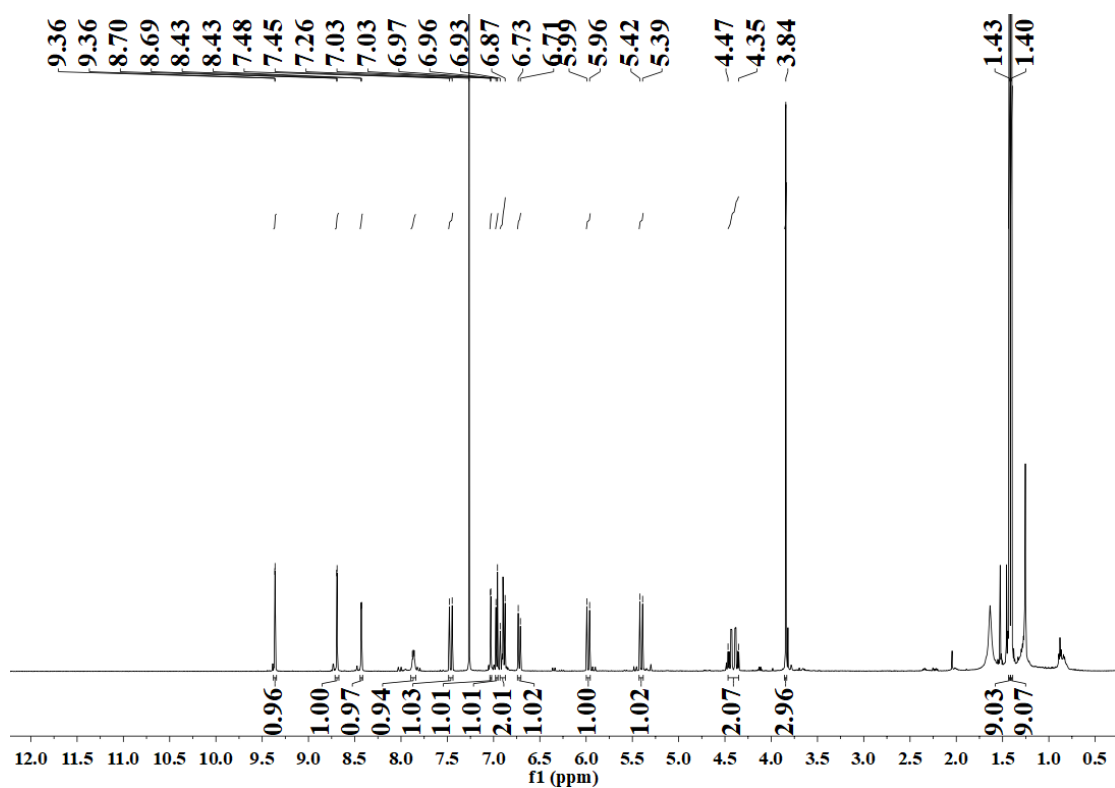

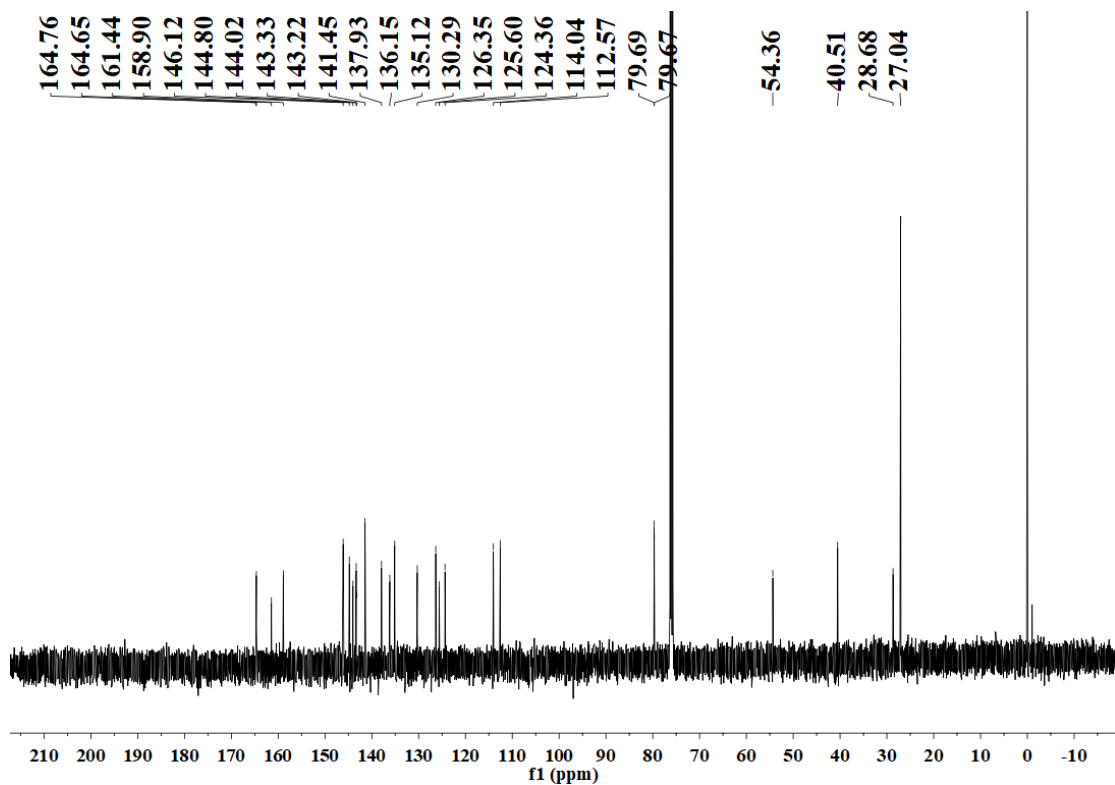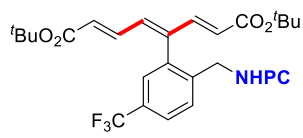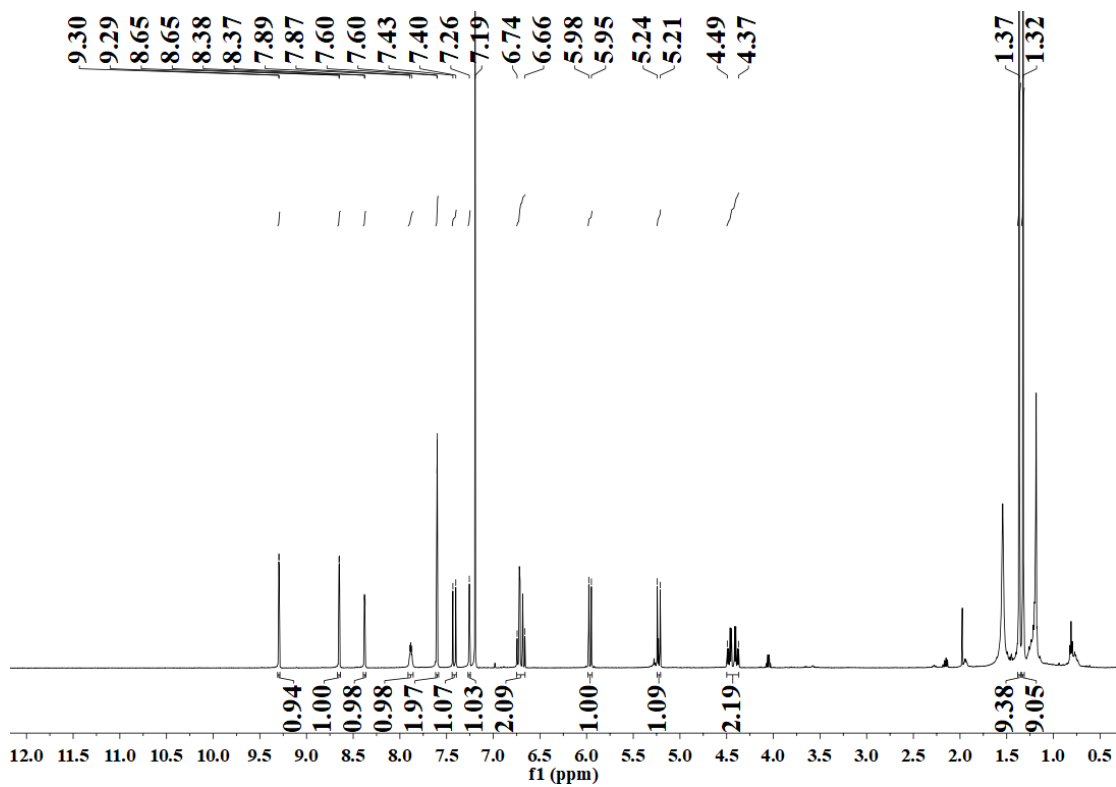

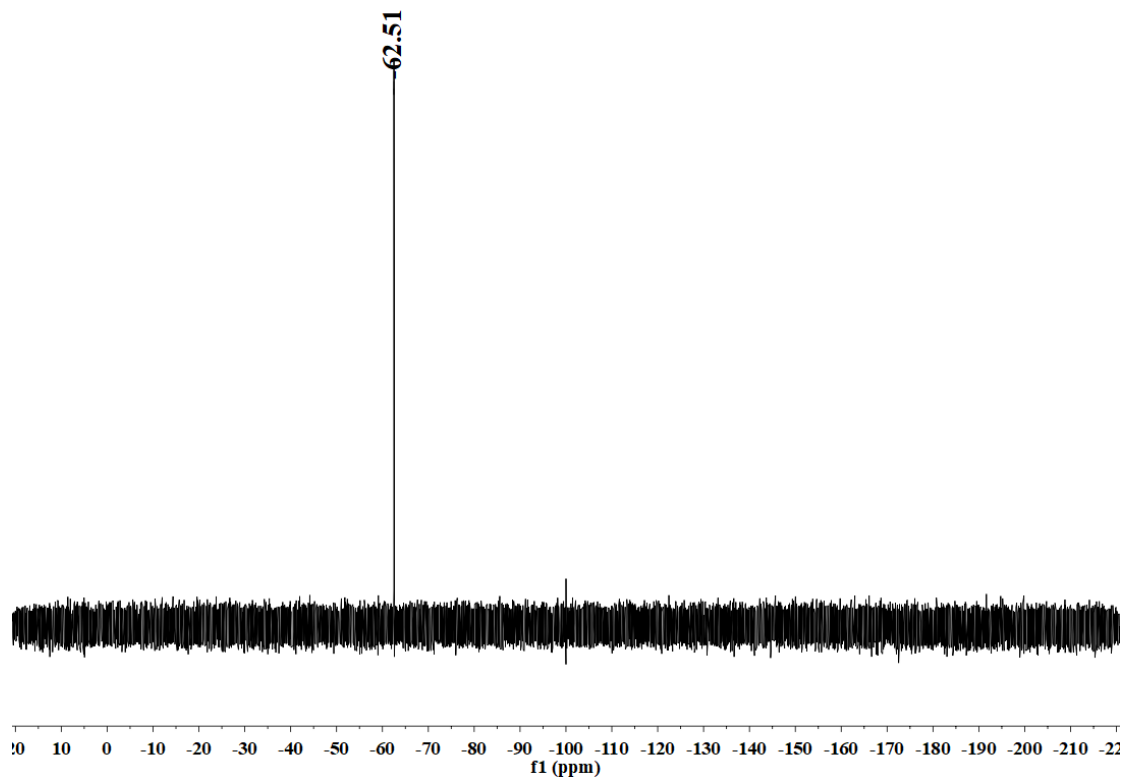

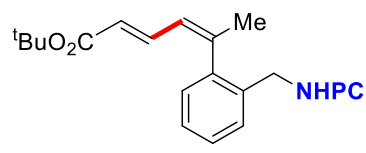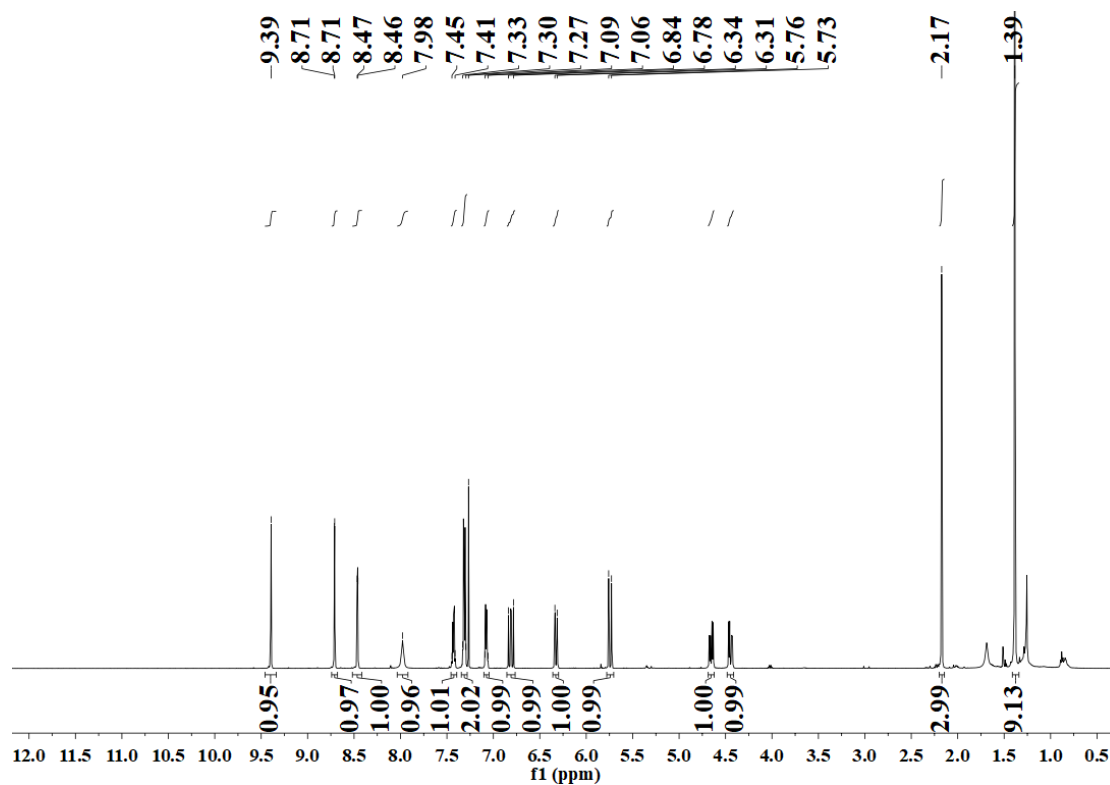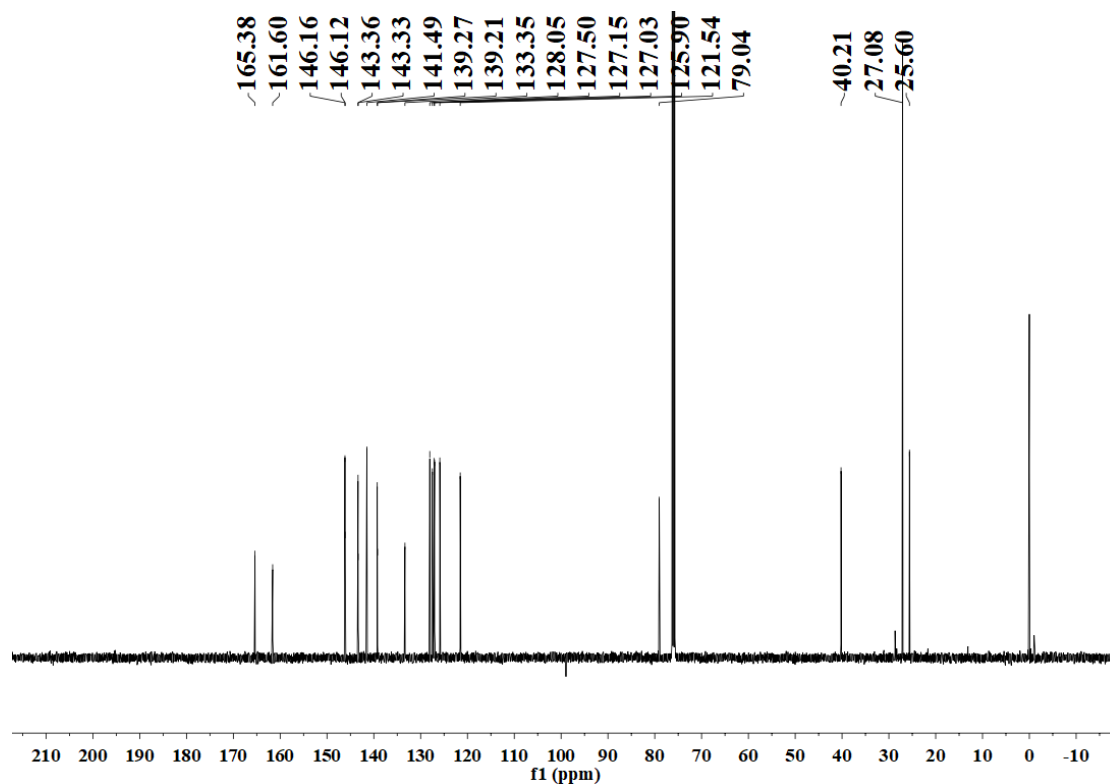

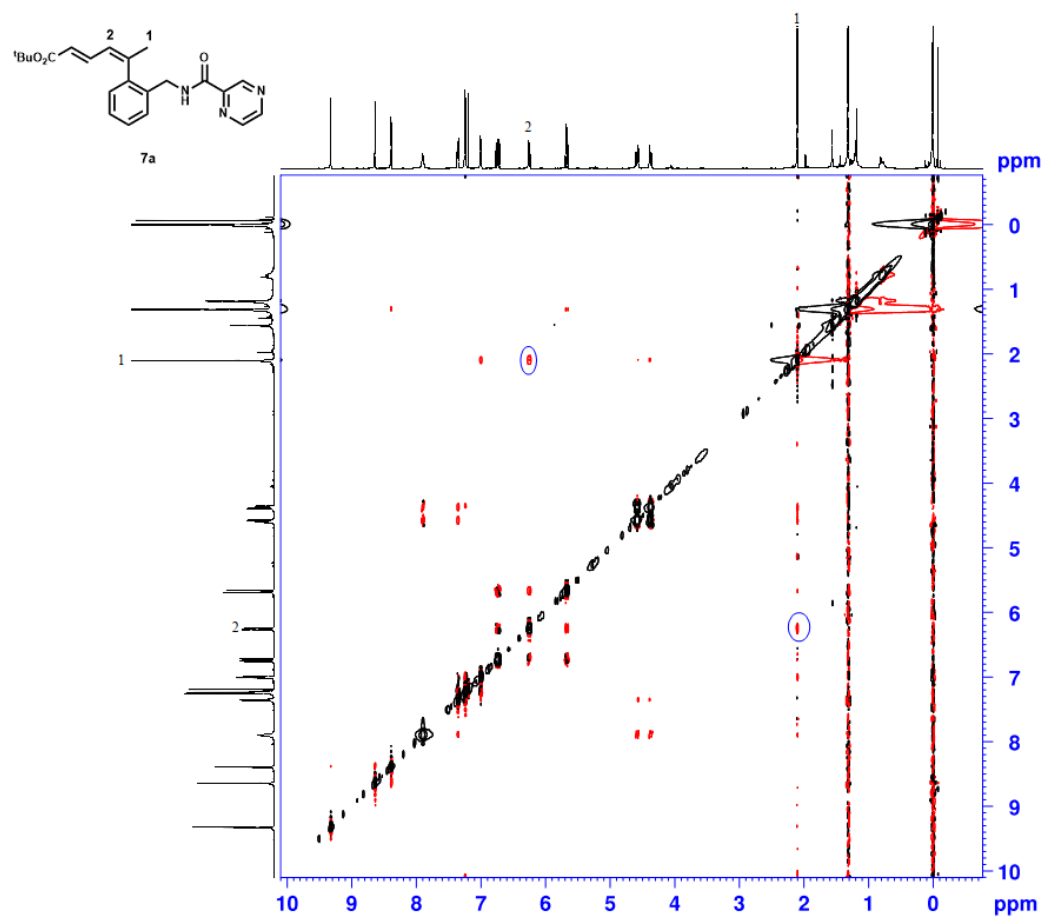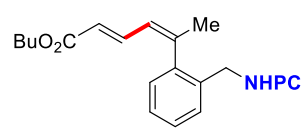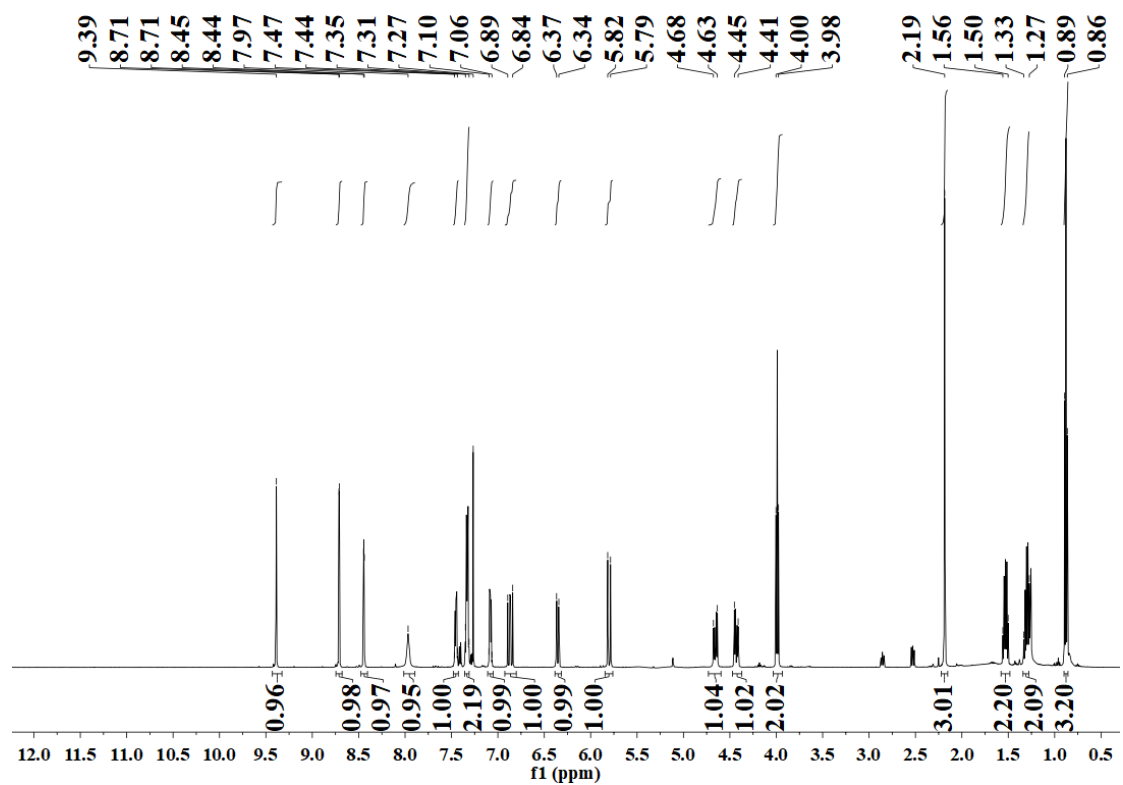

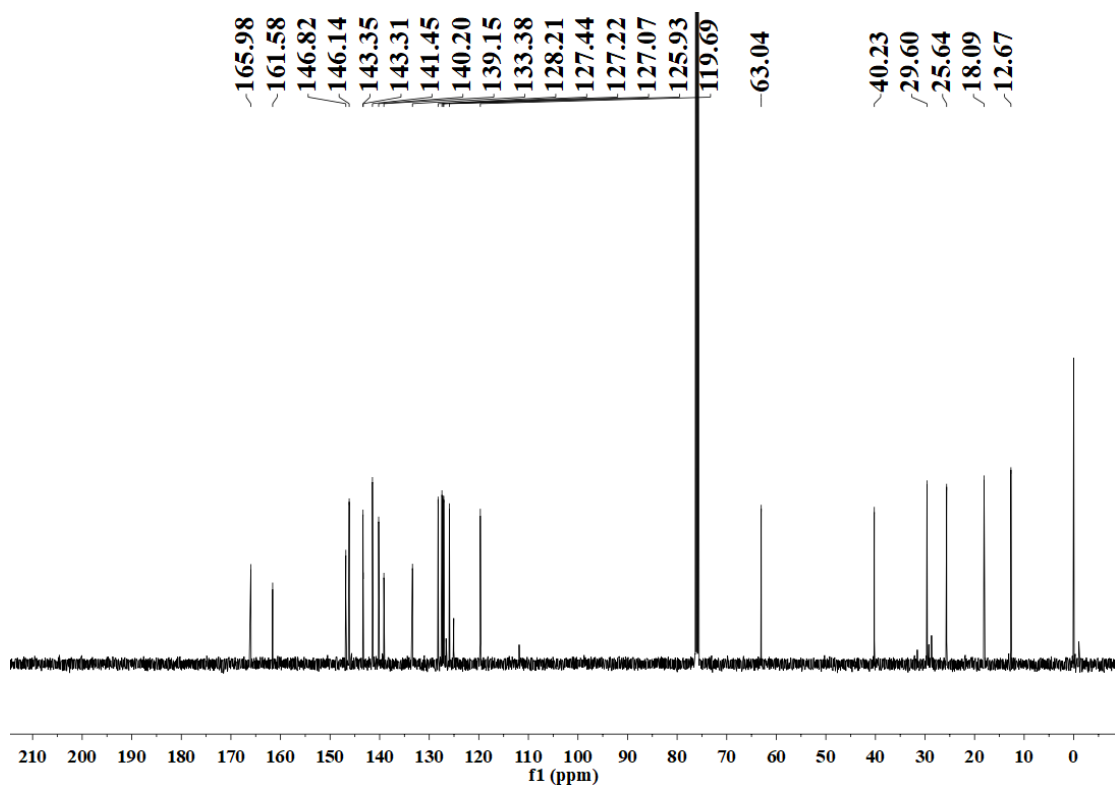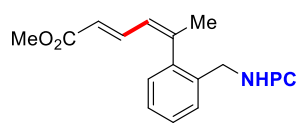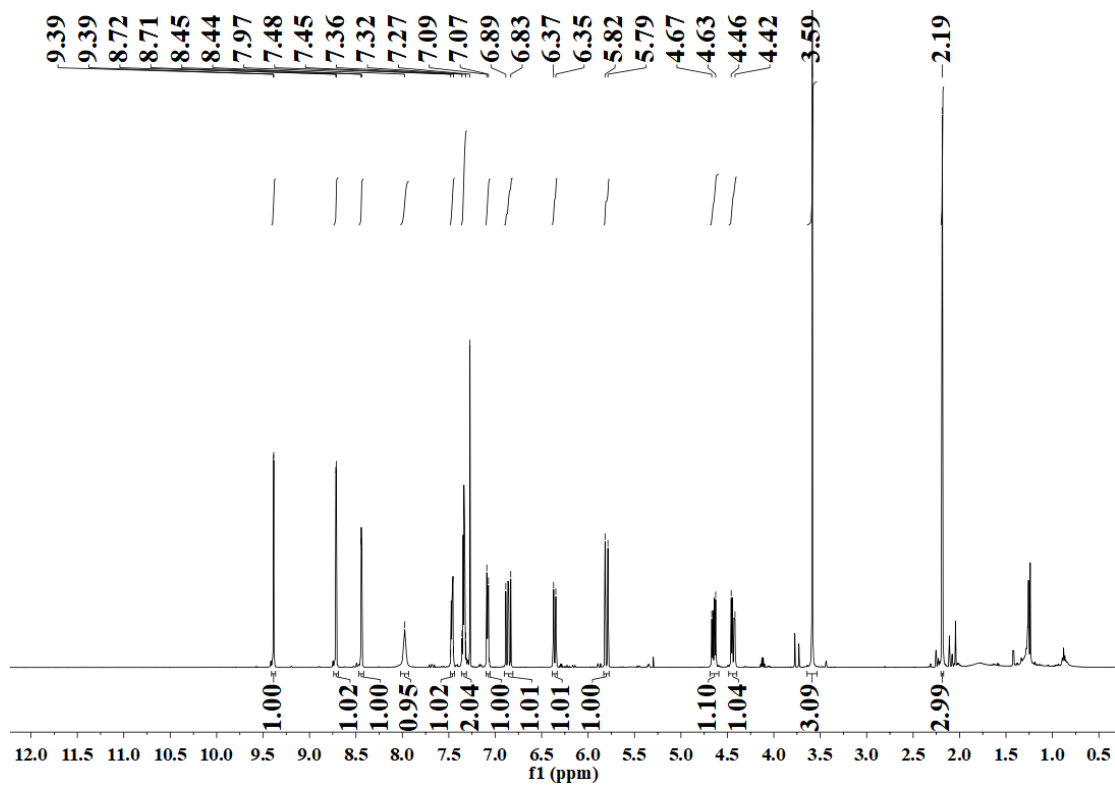

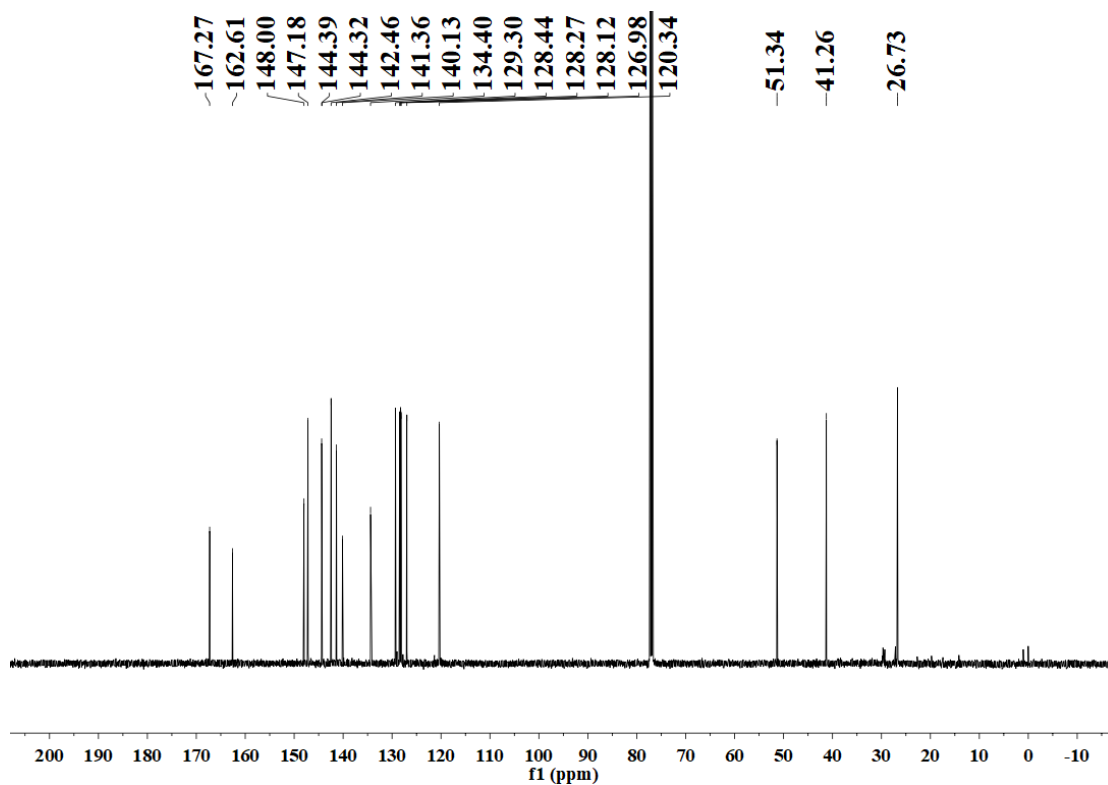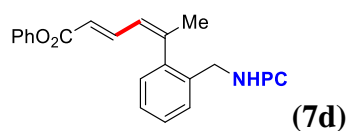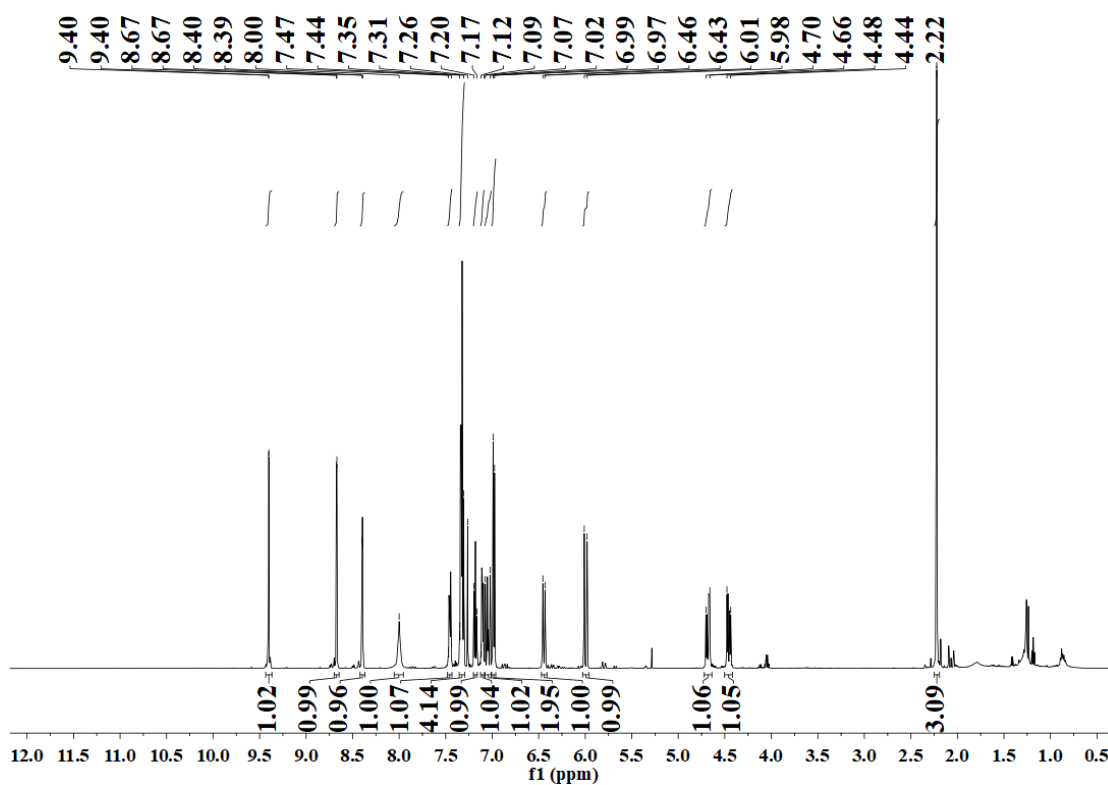

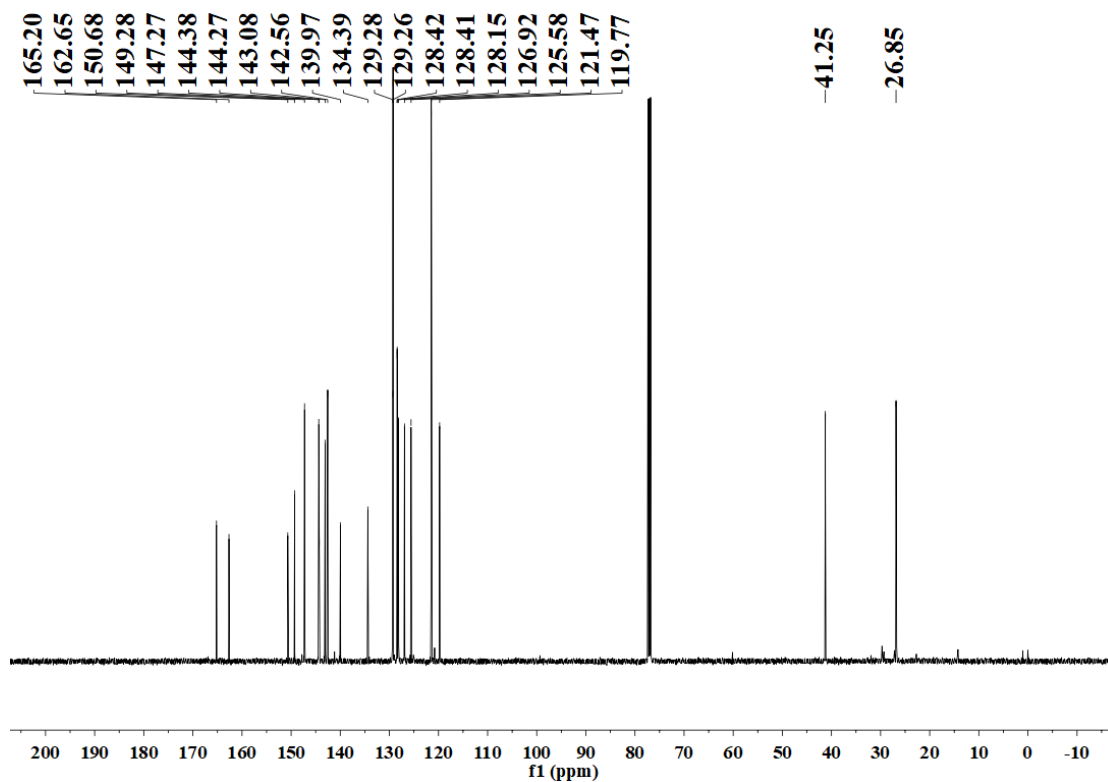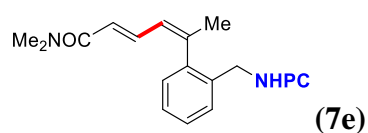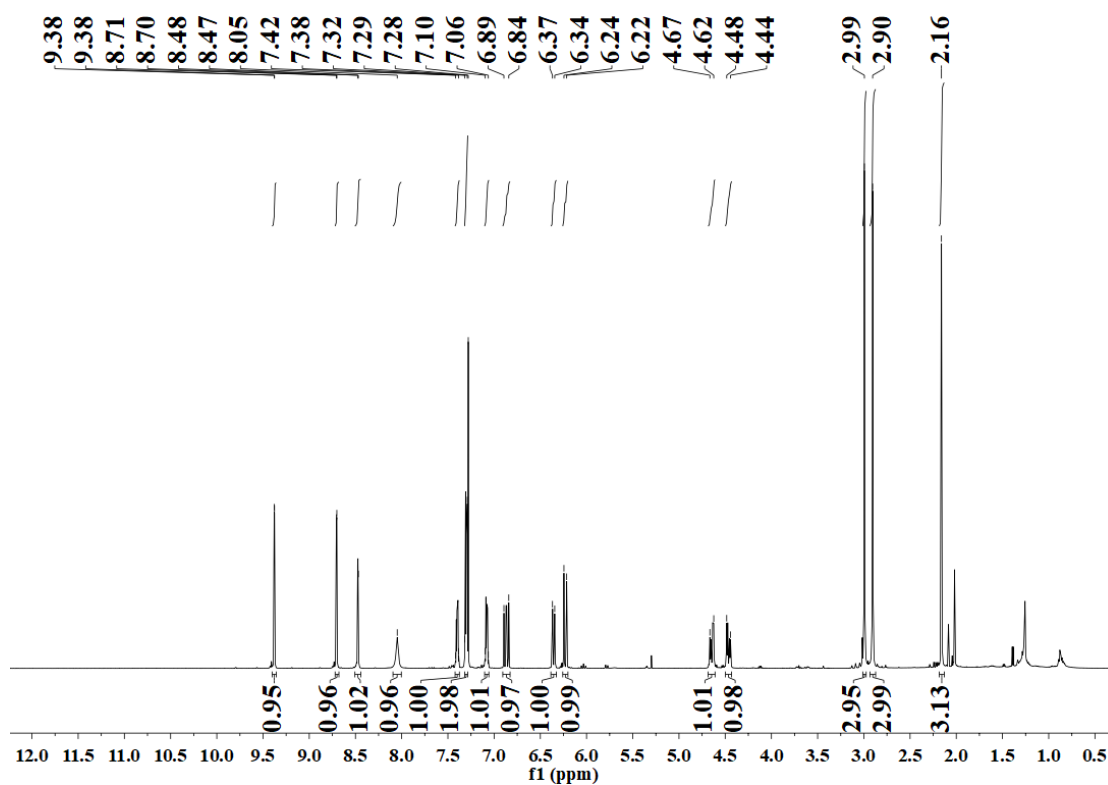



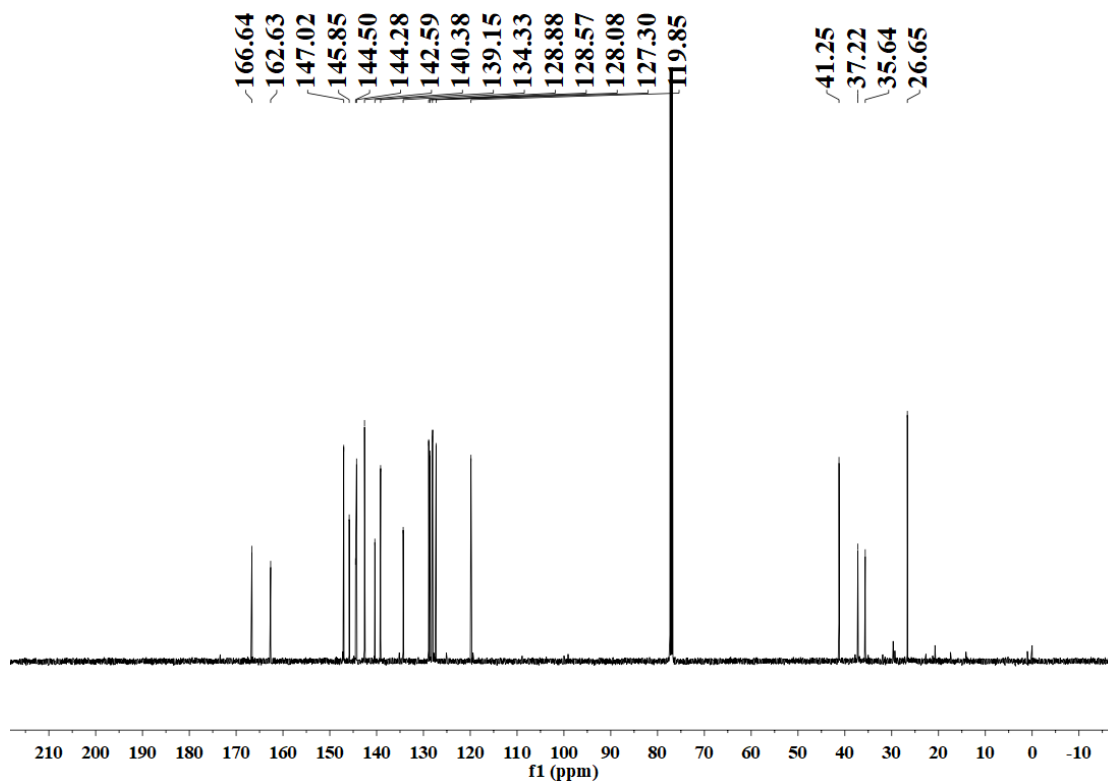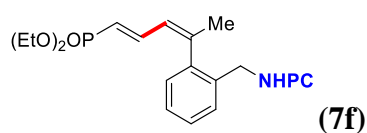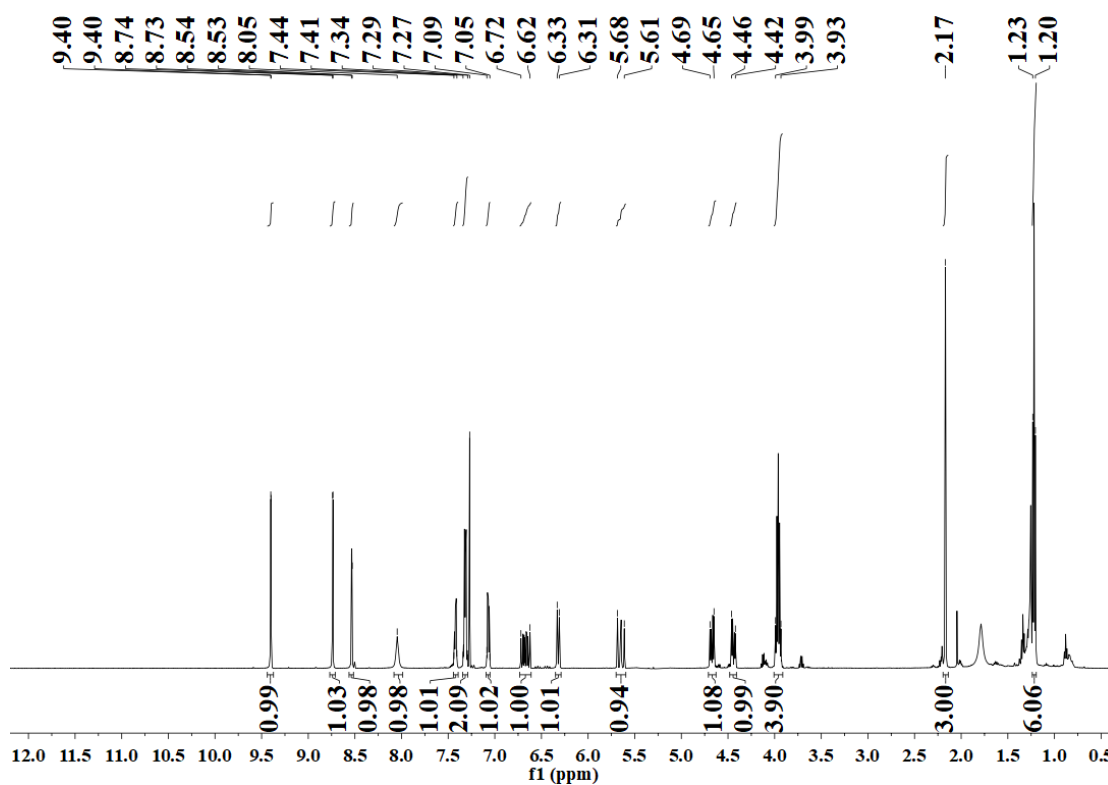

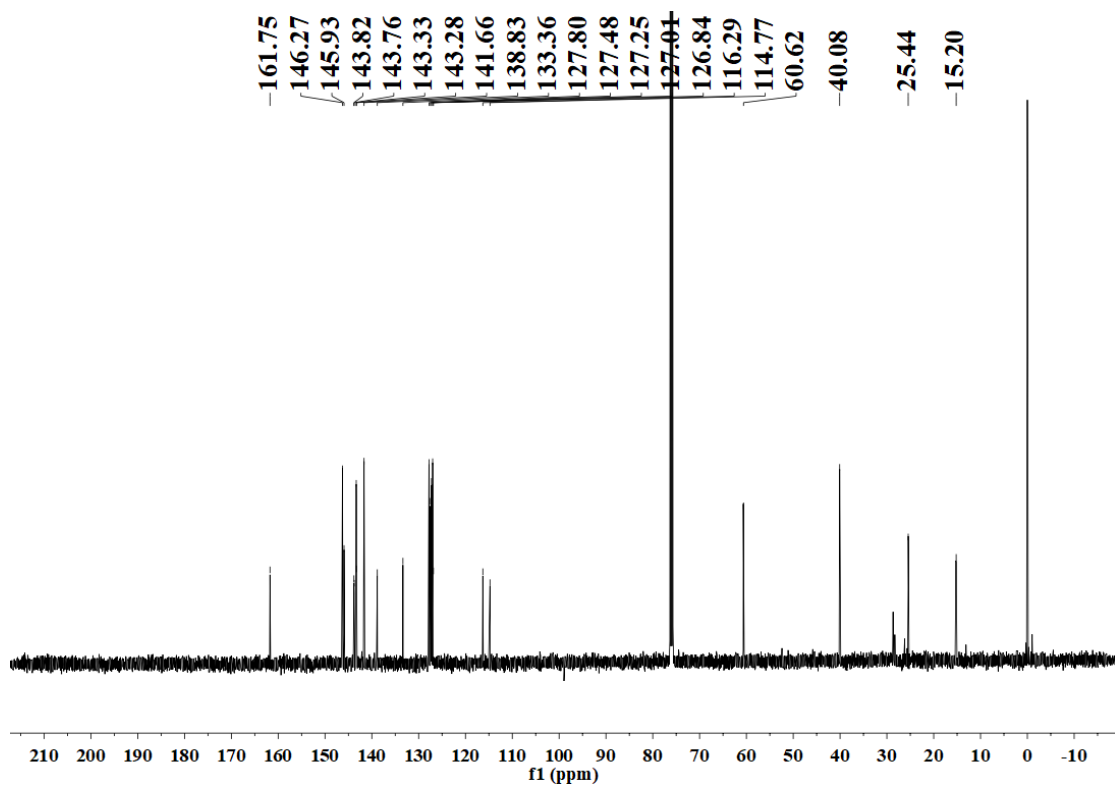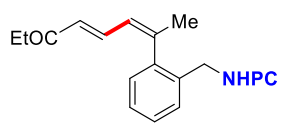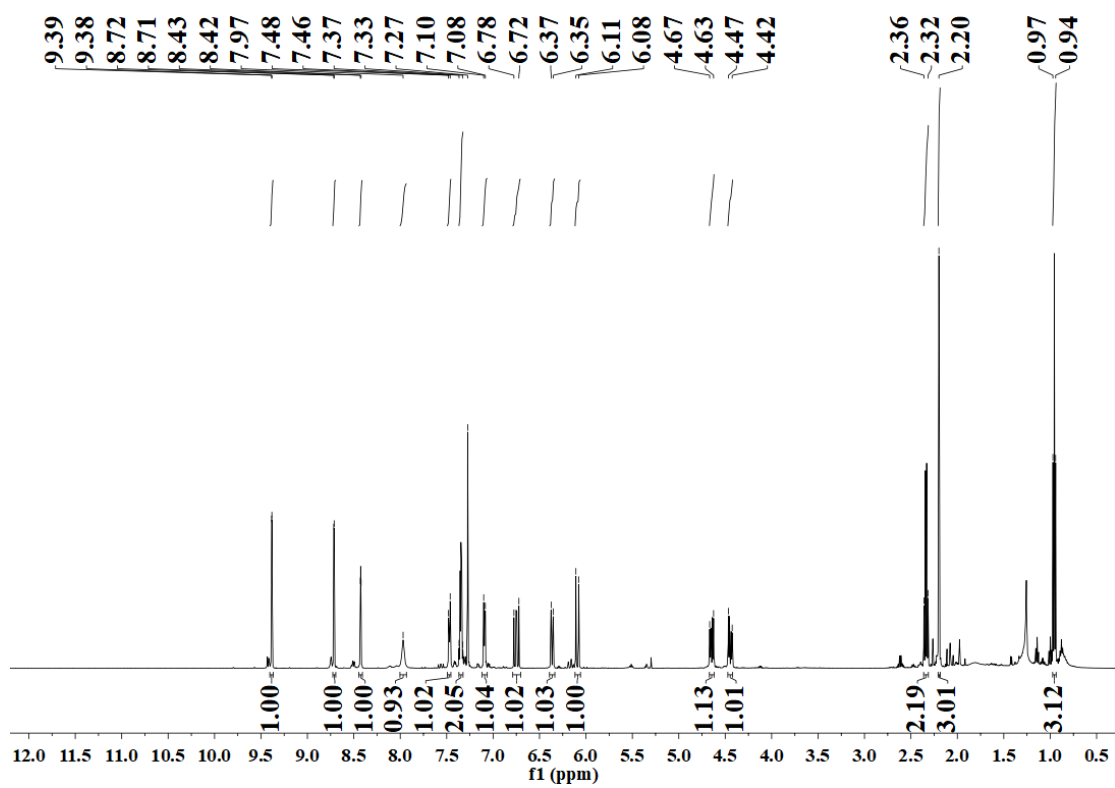

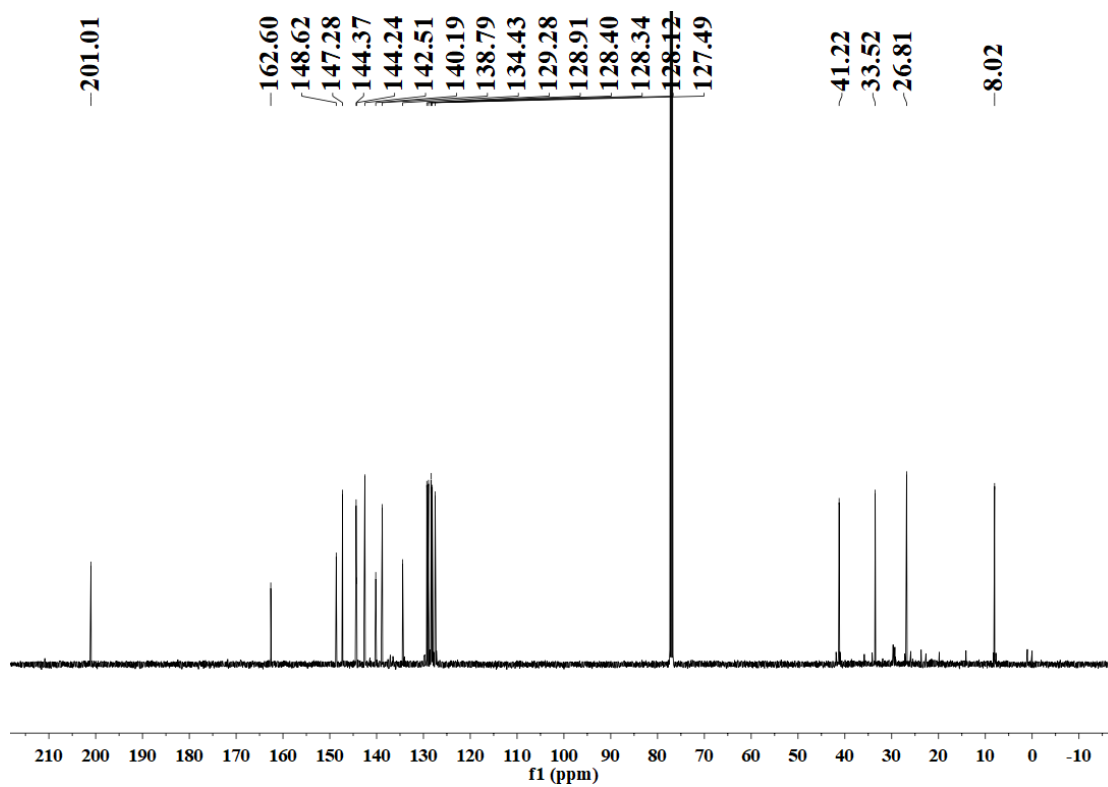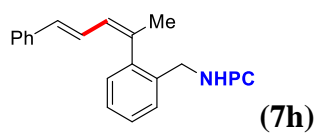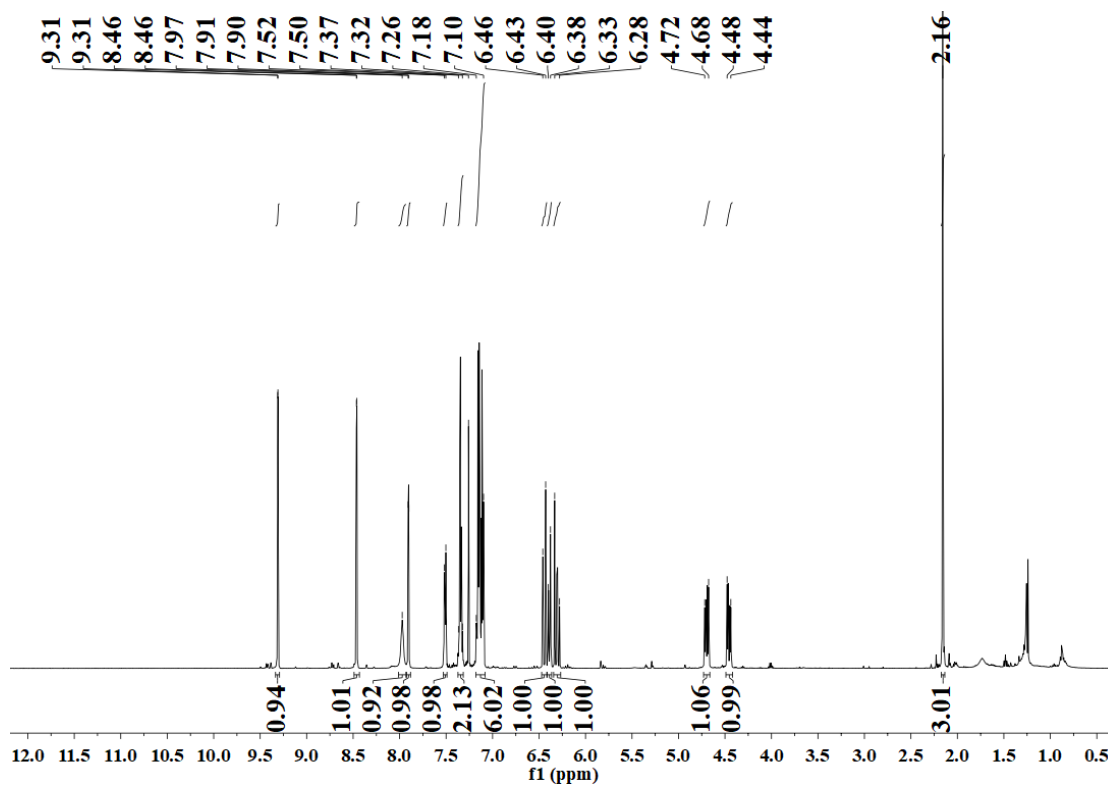

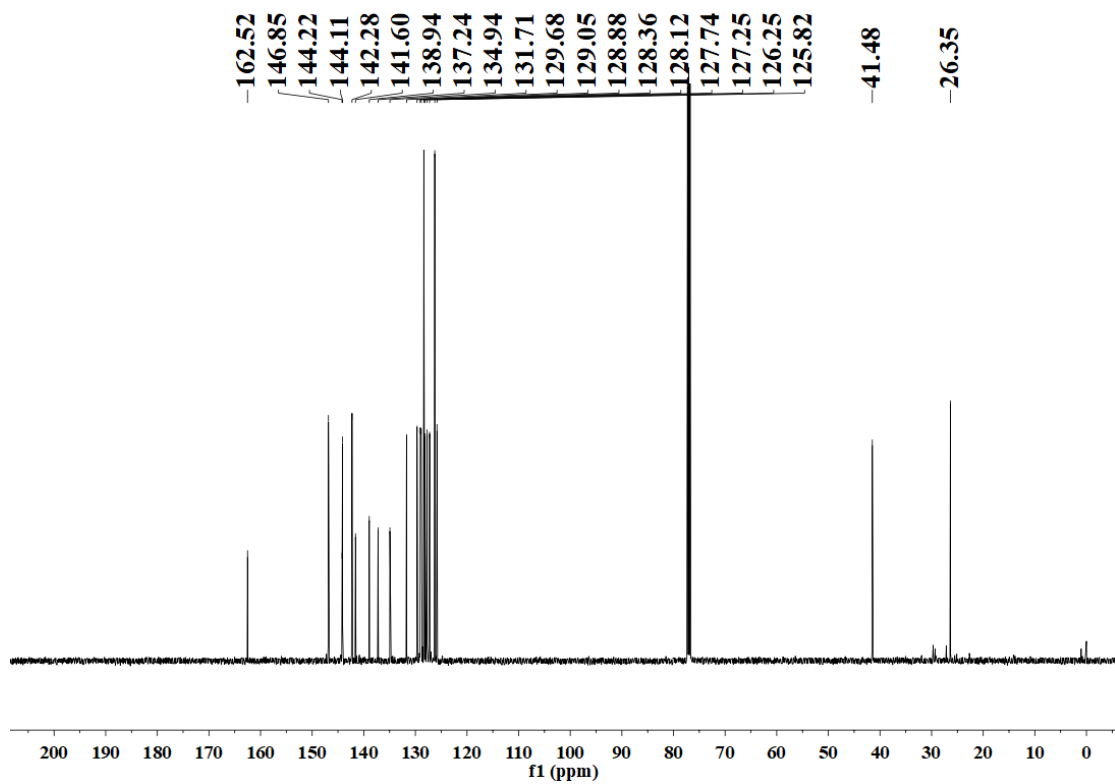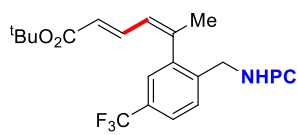

(7i)

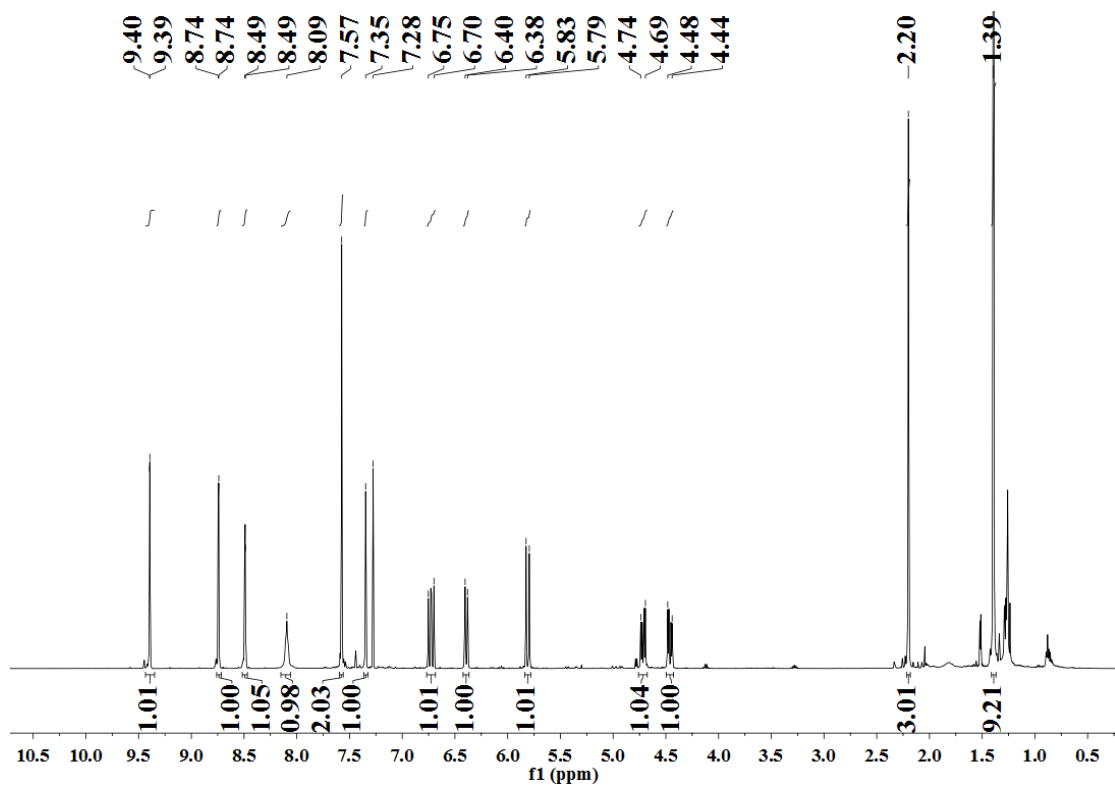

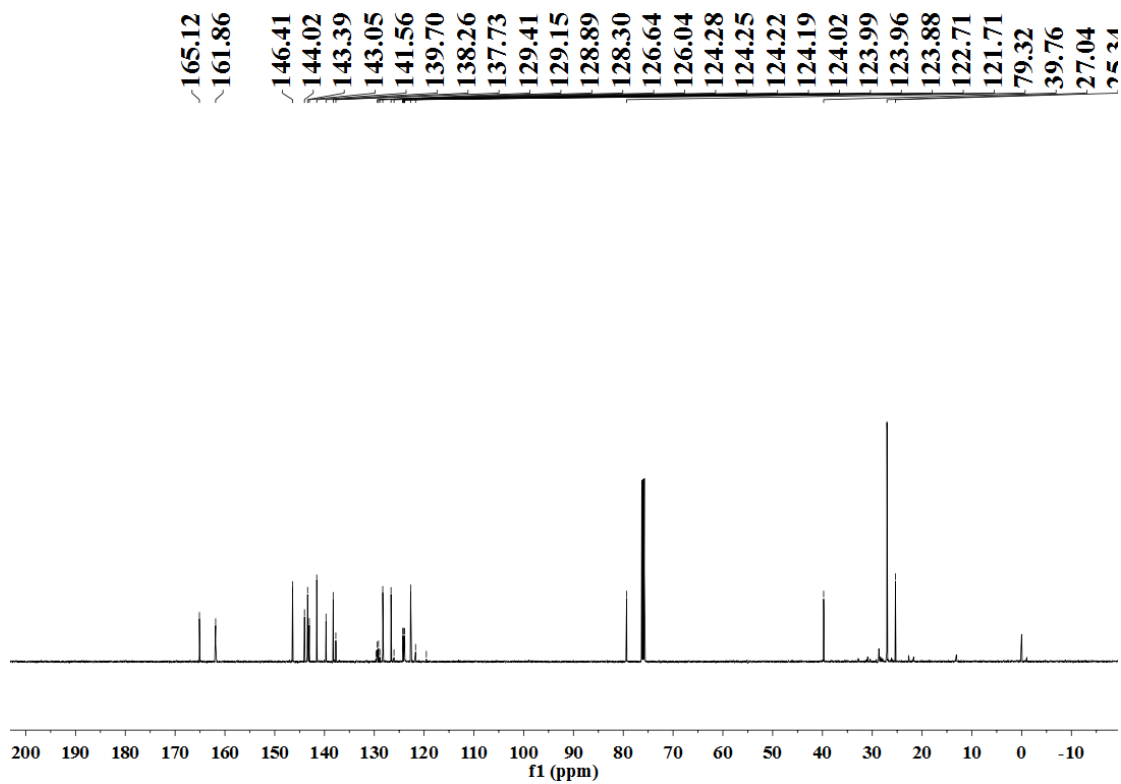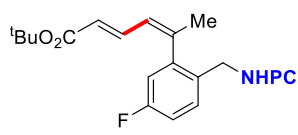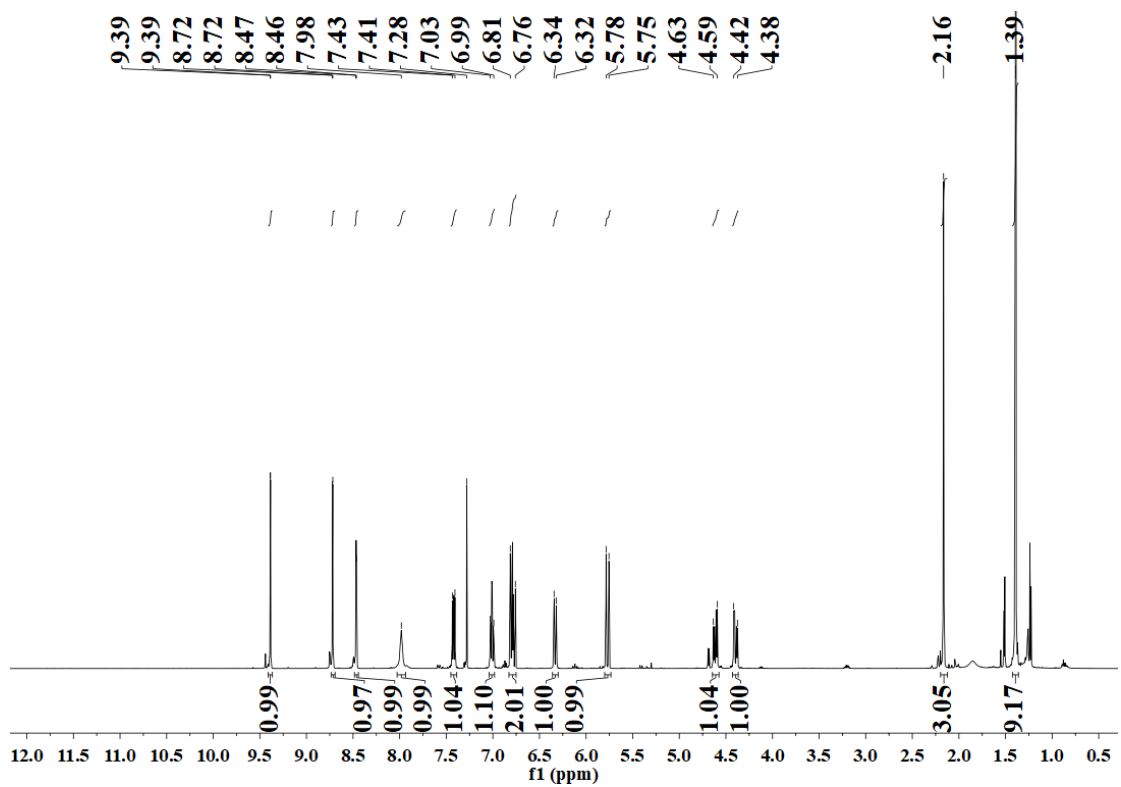

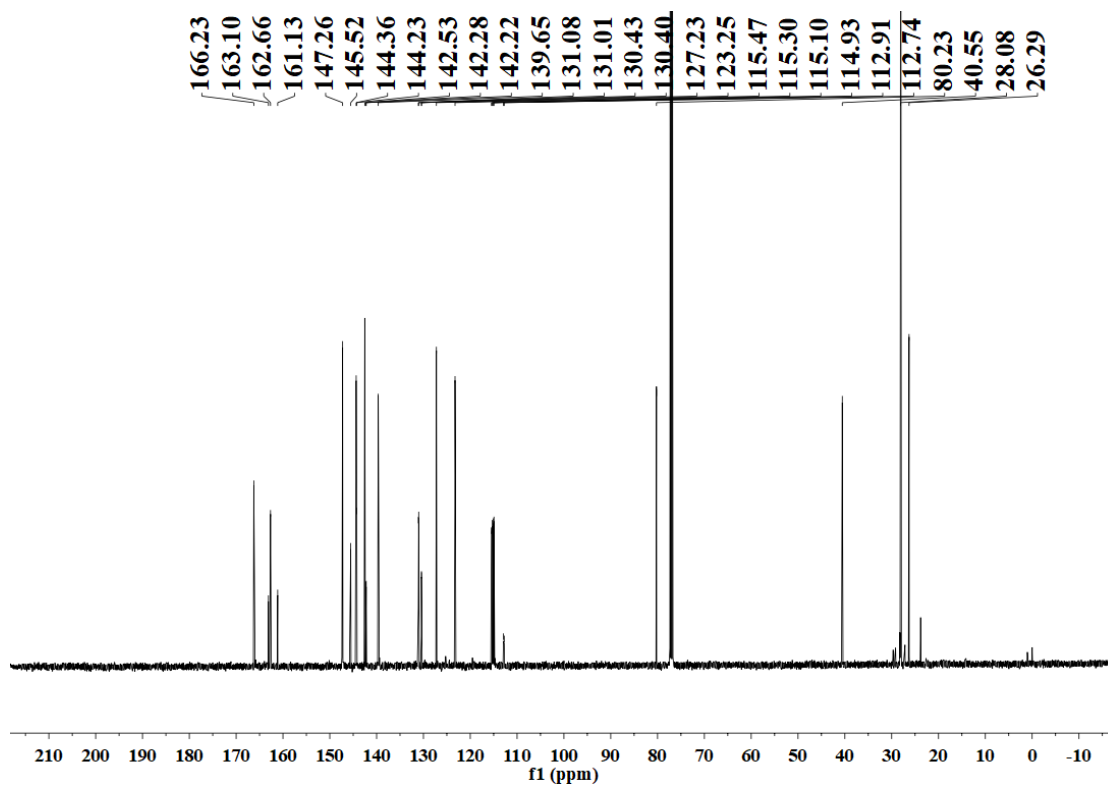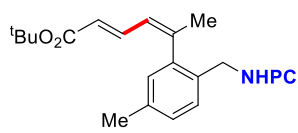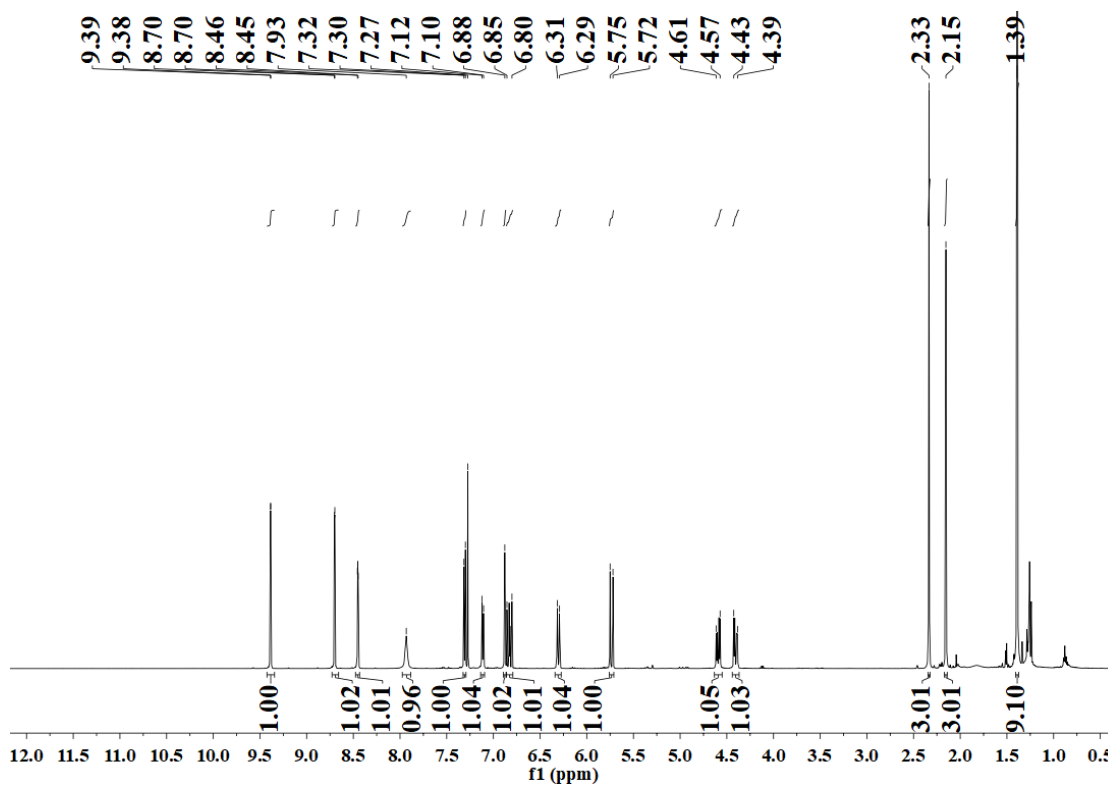

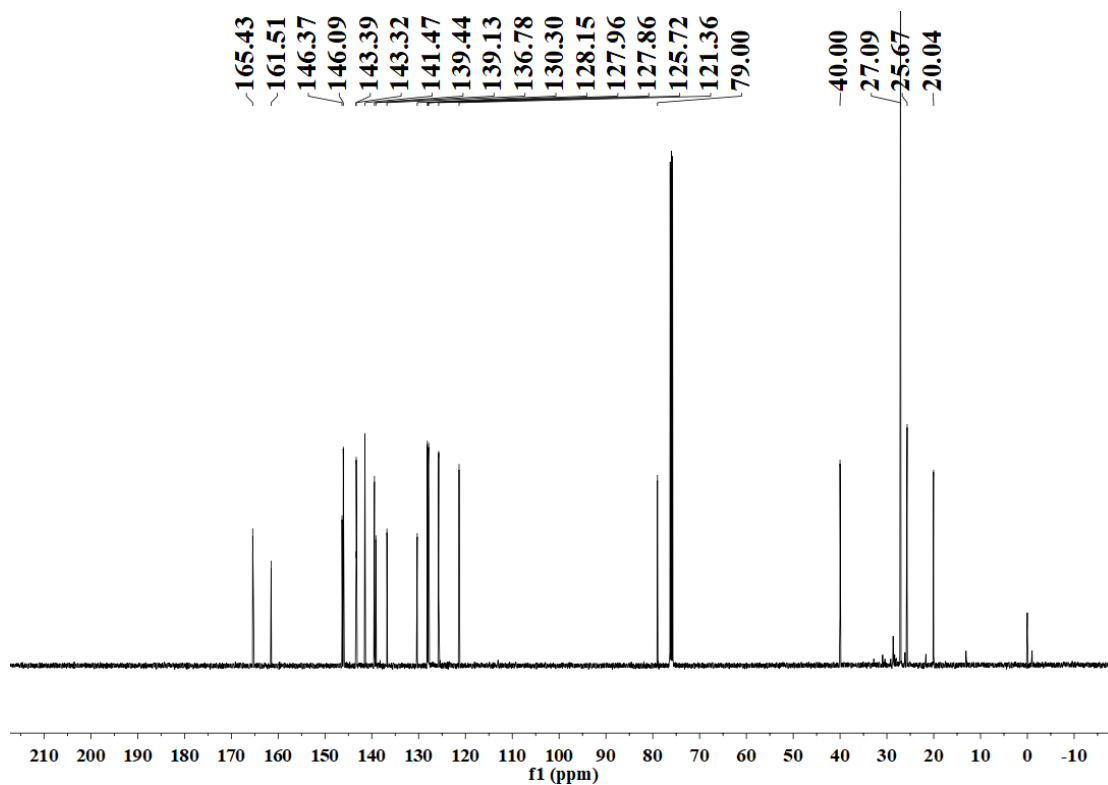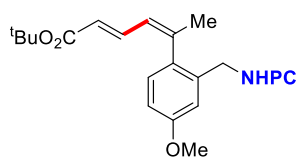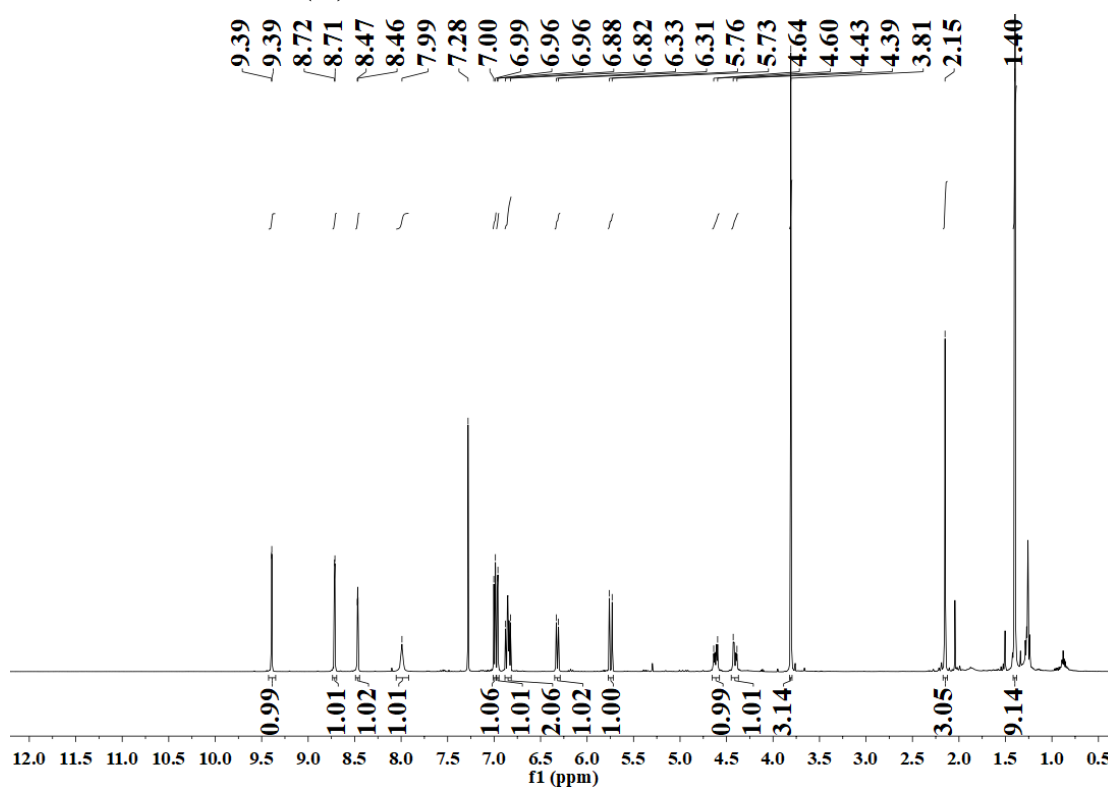

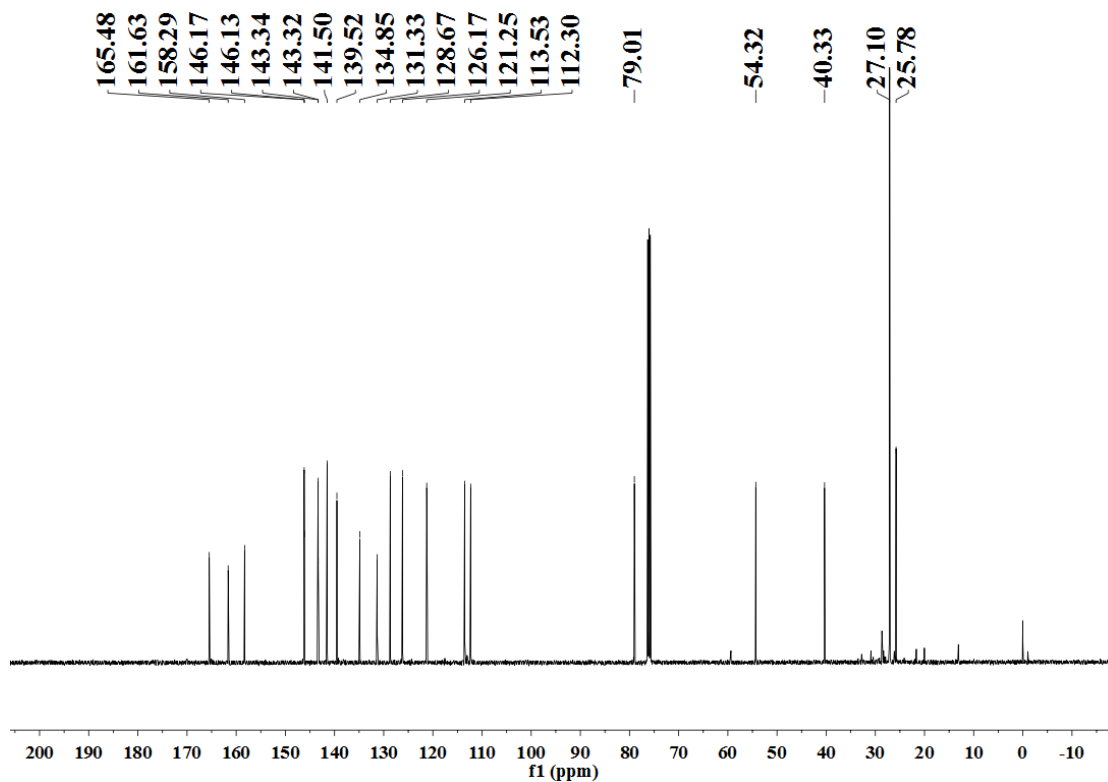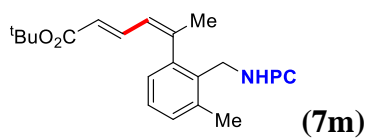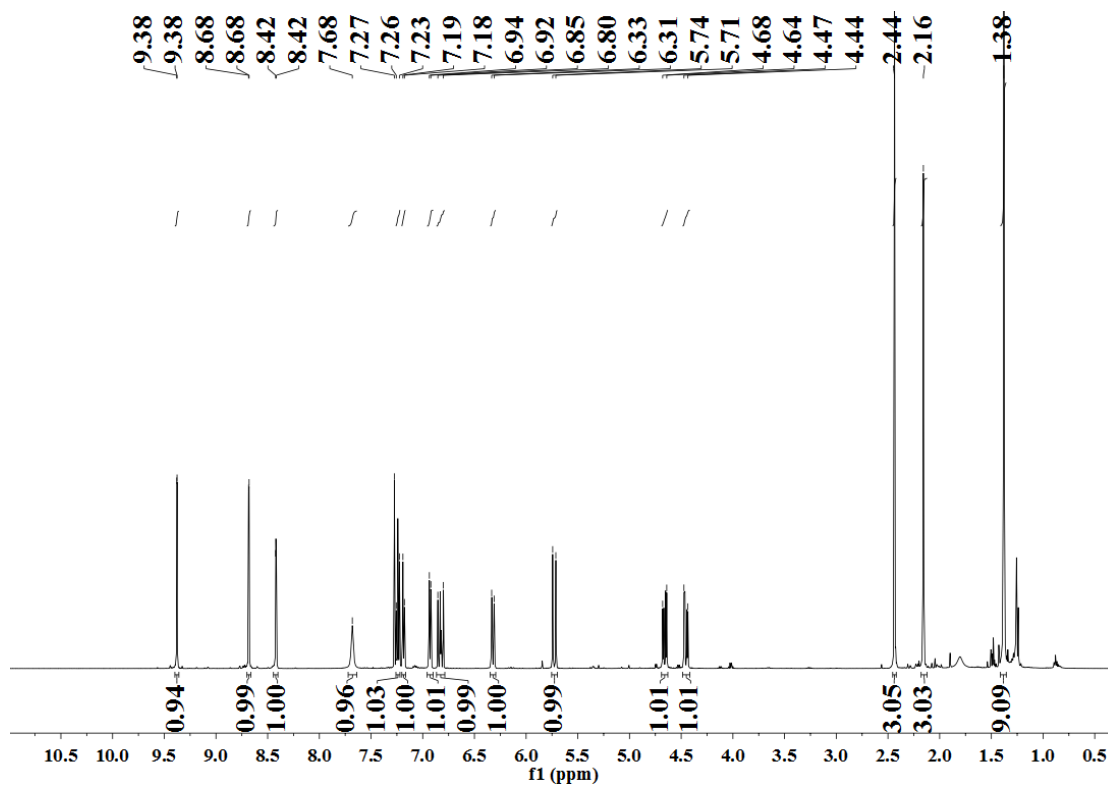



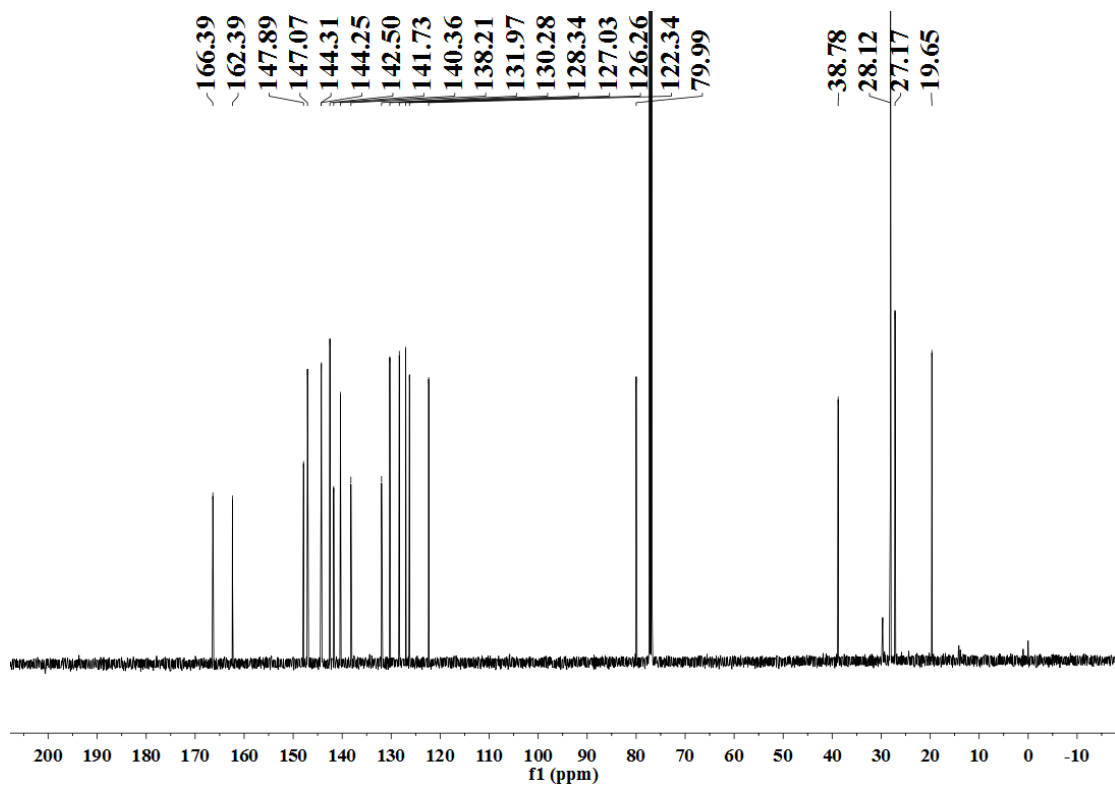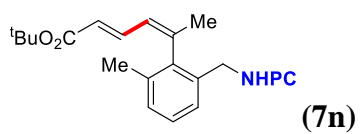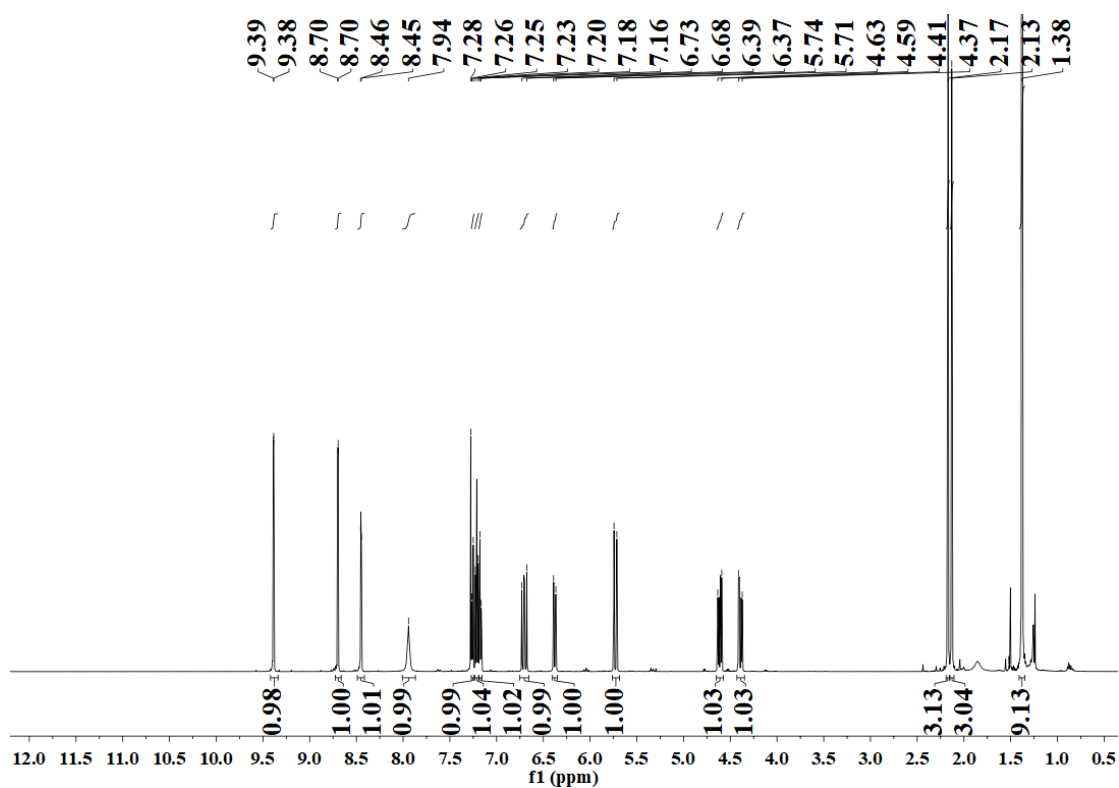

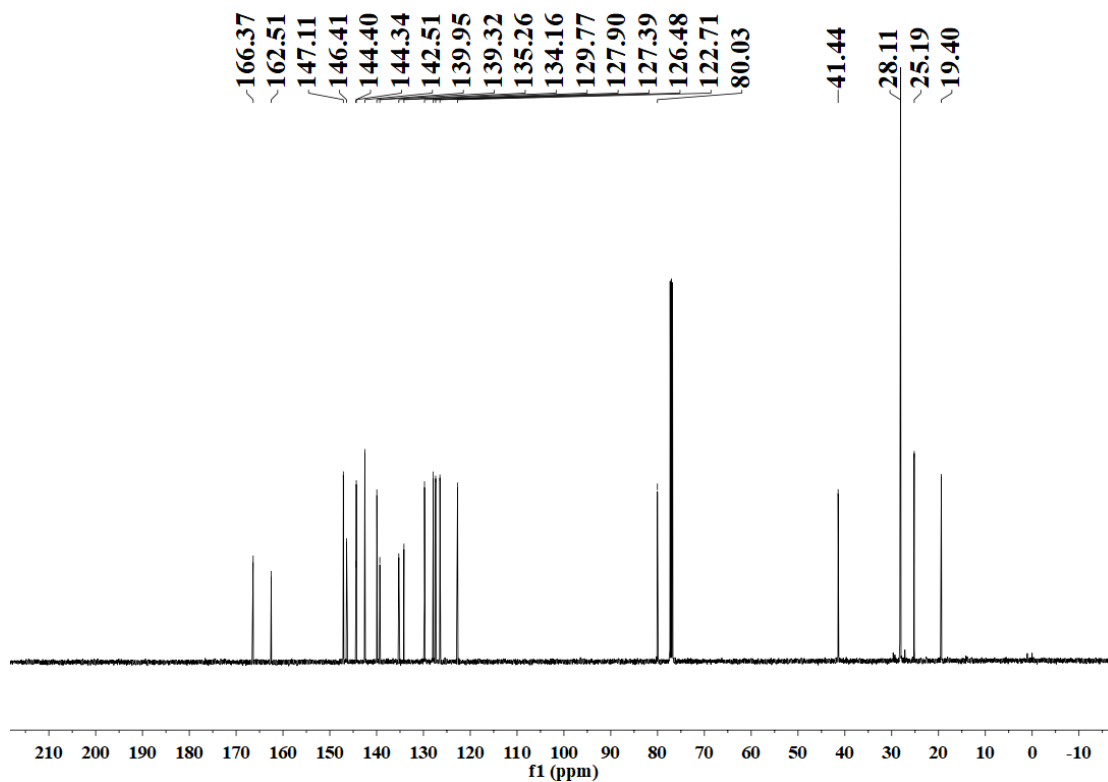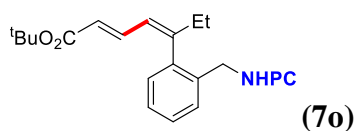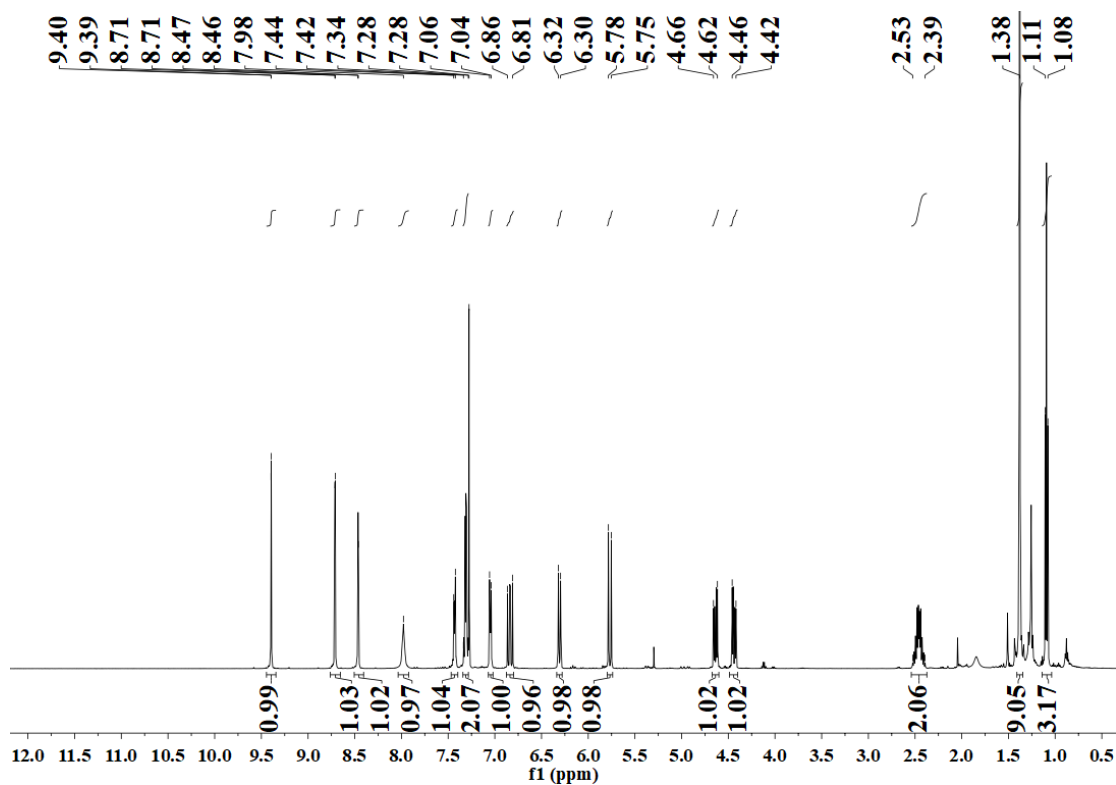

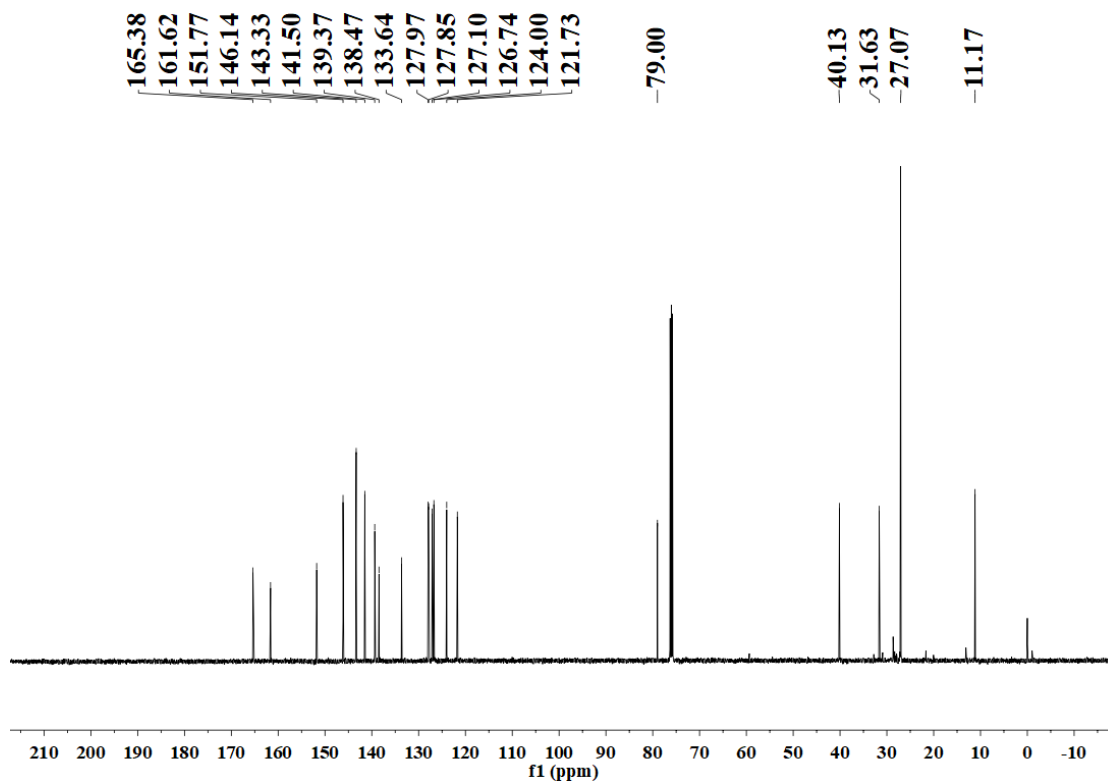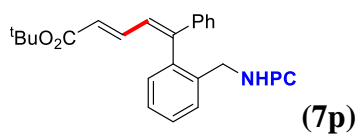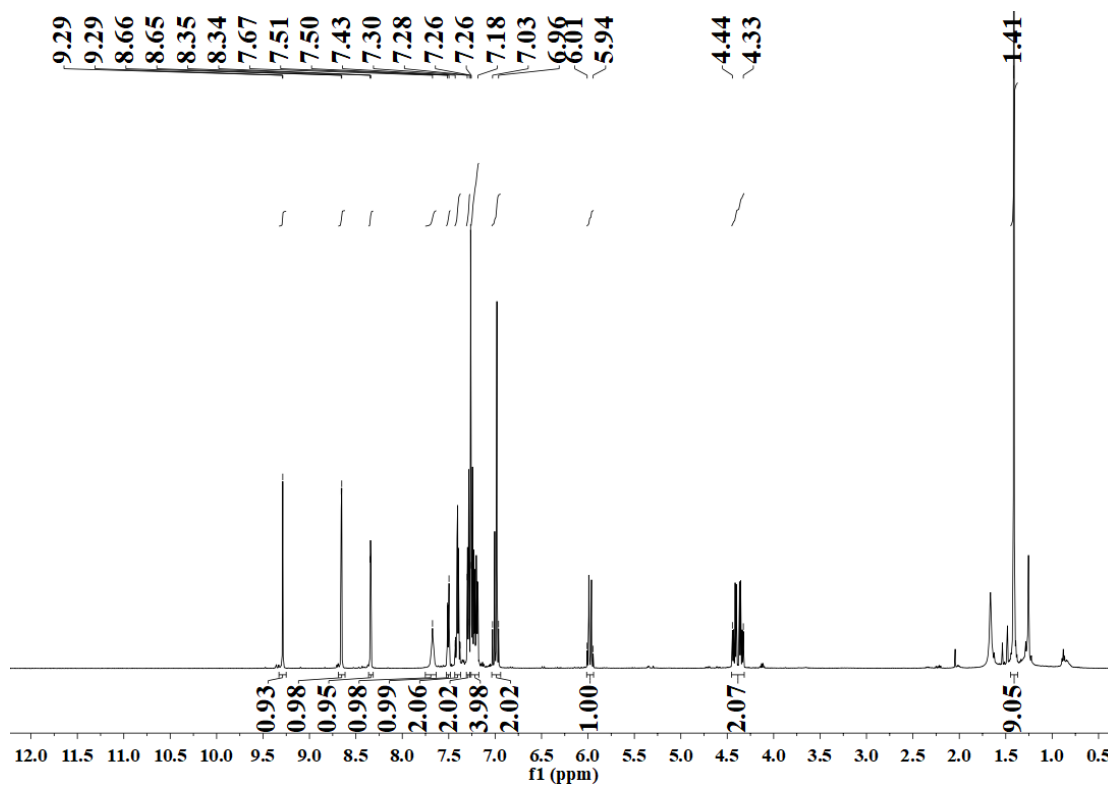

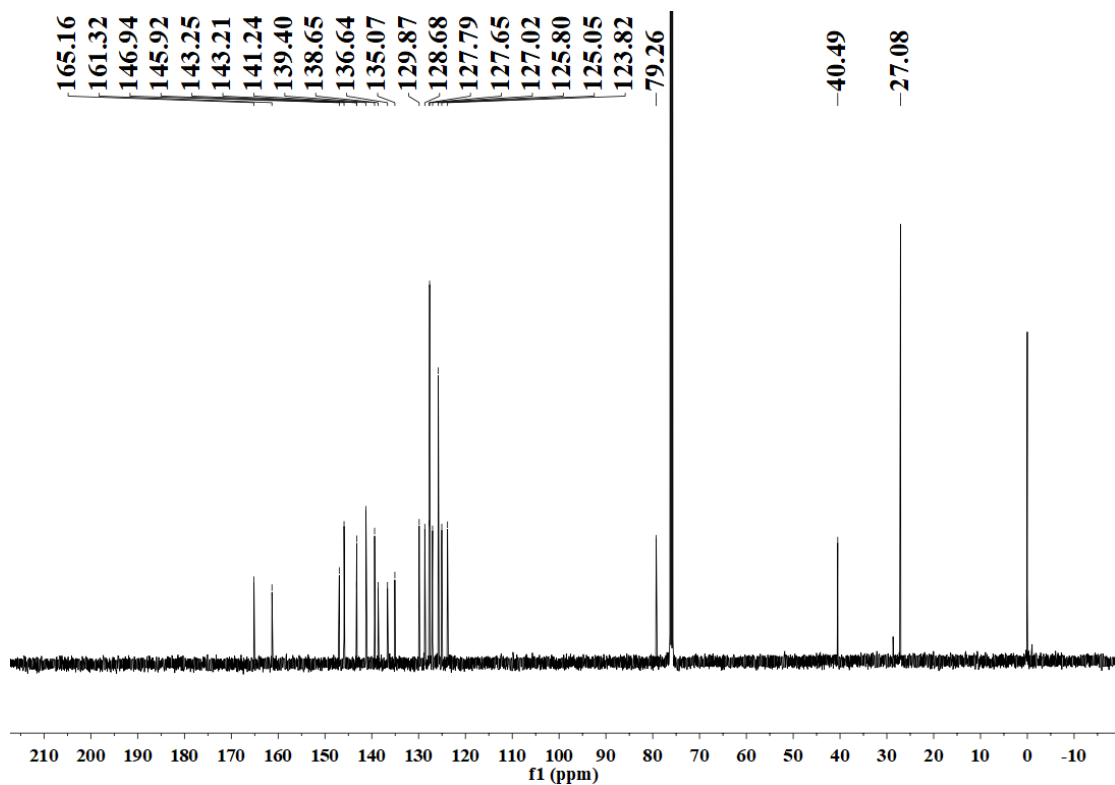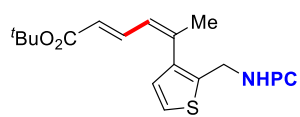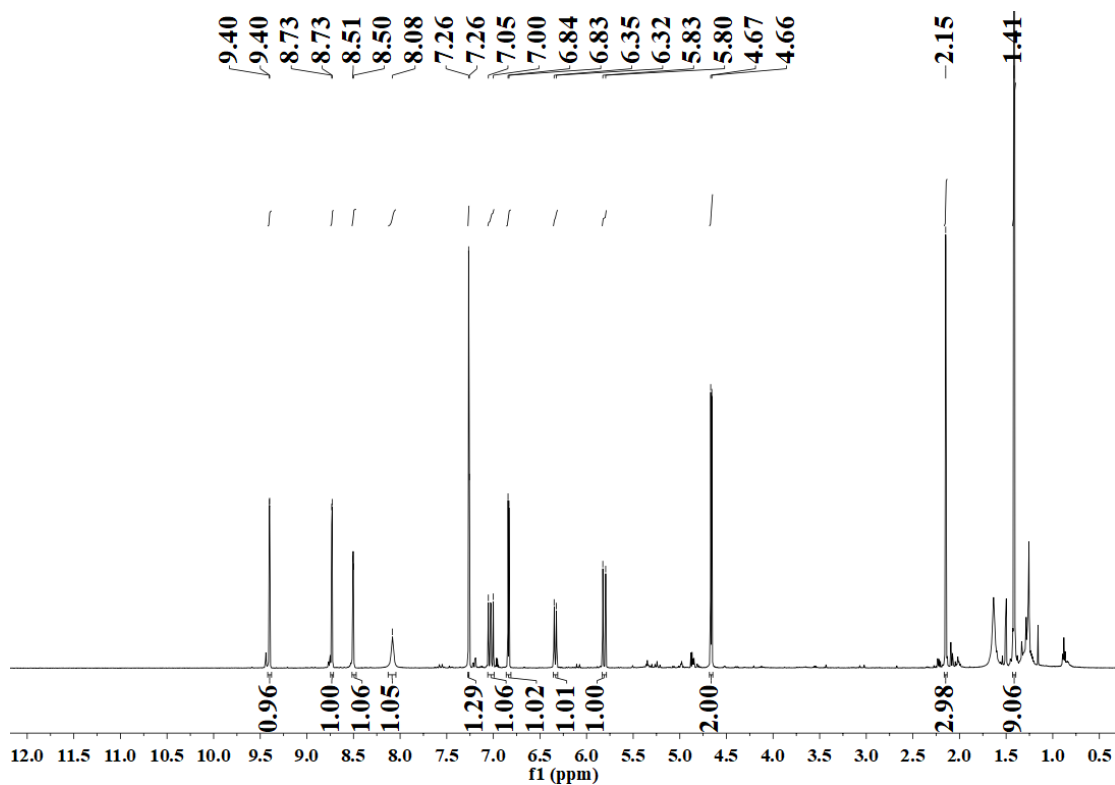

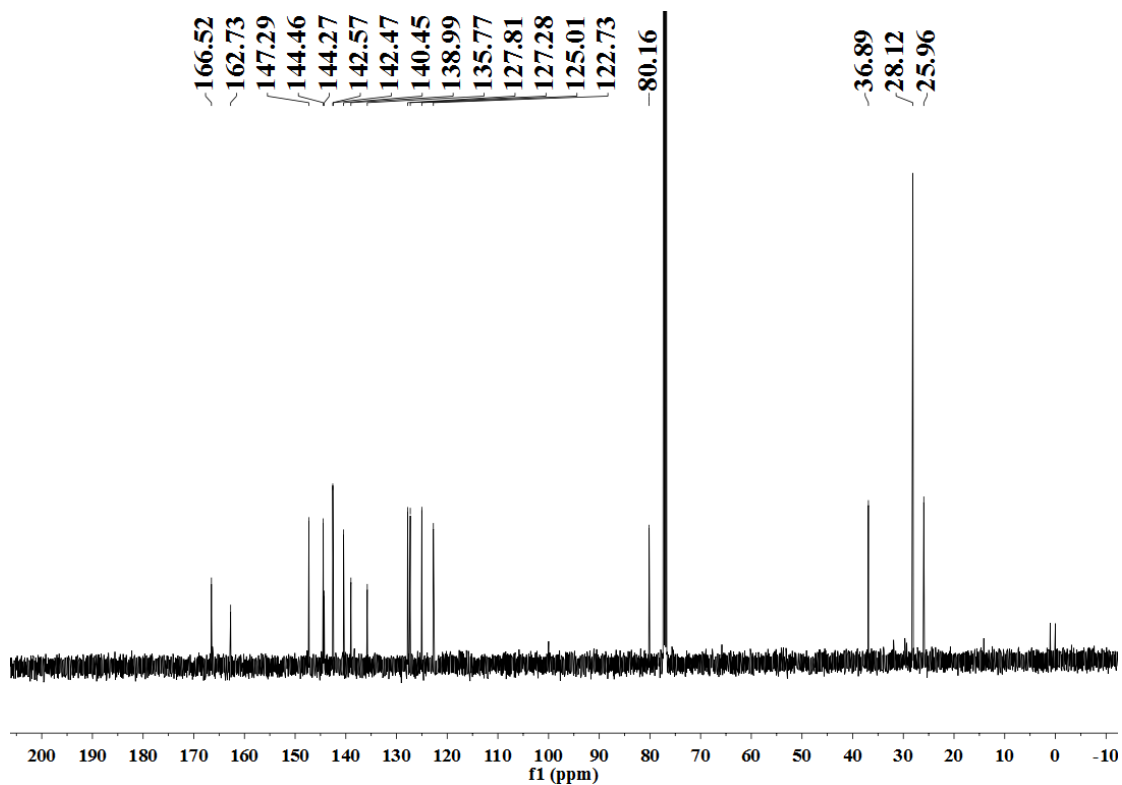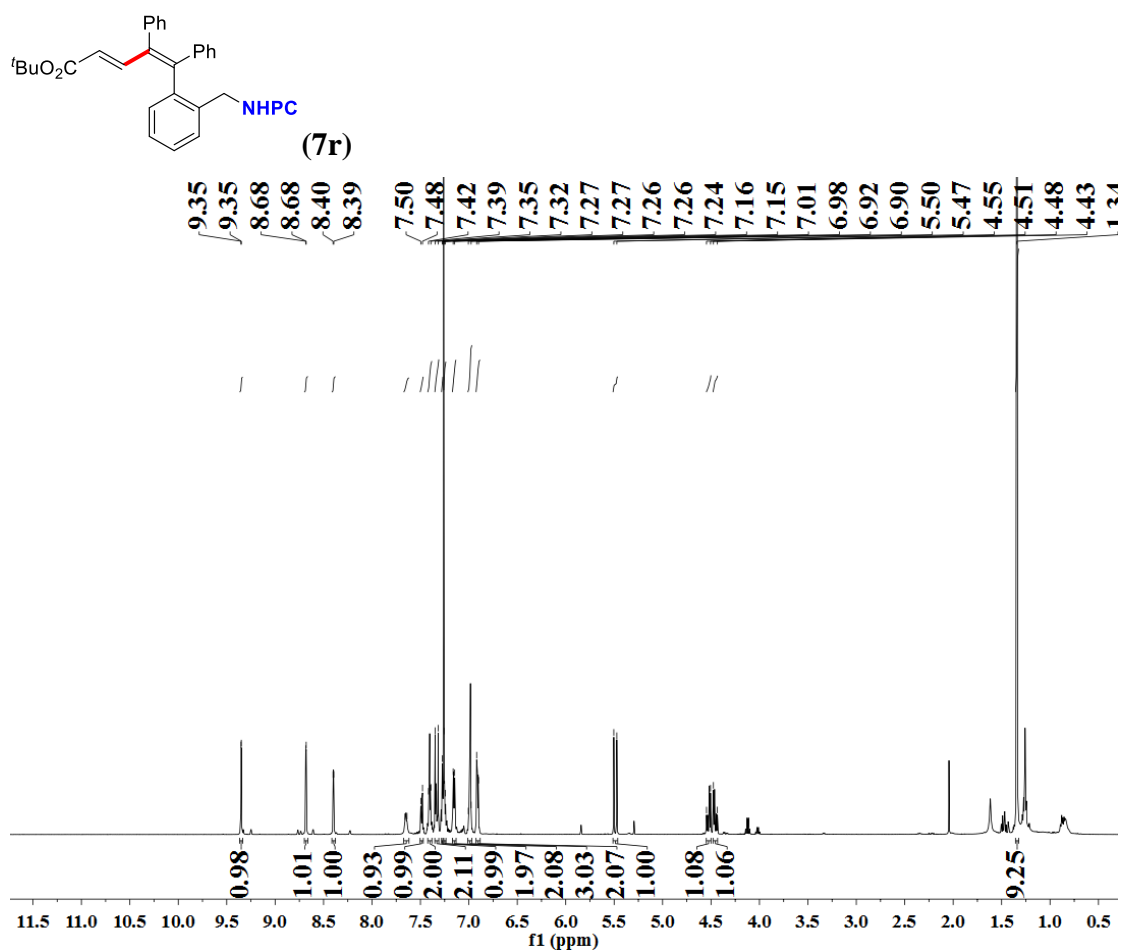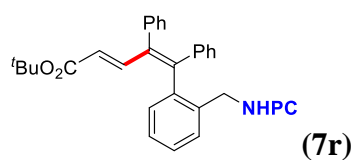

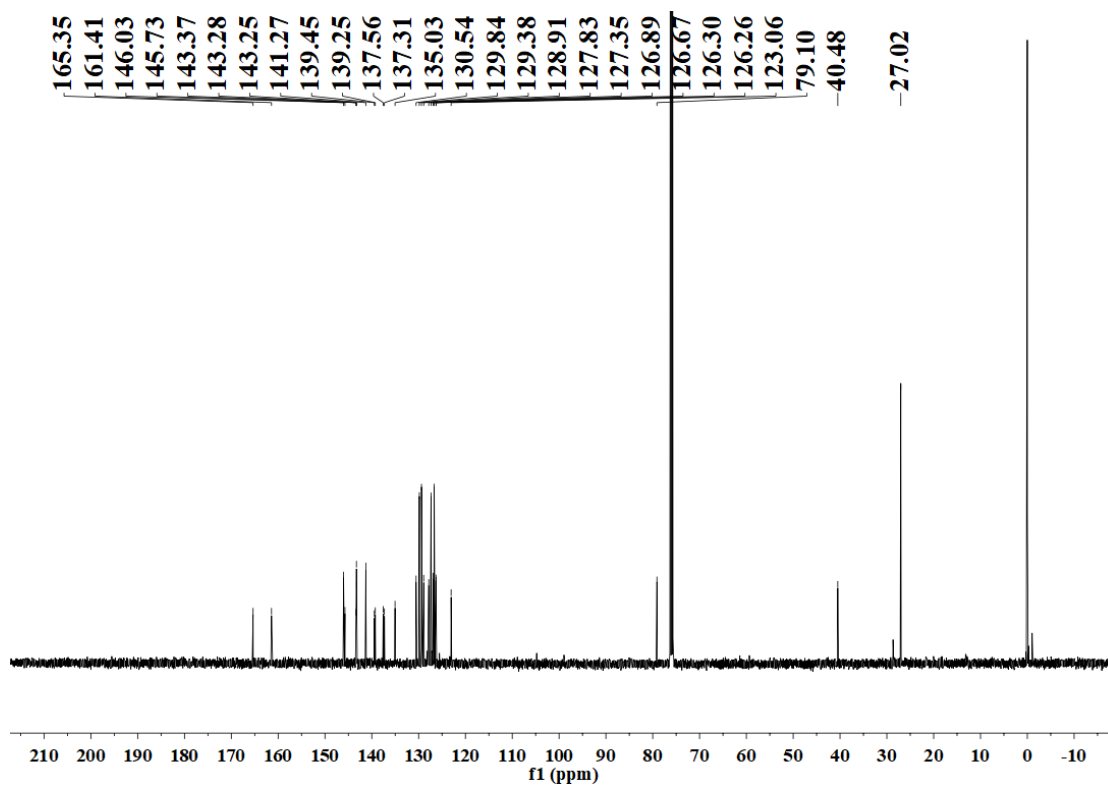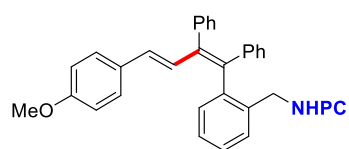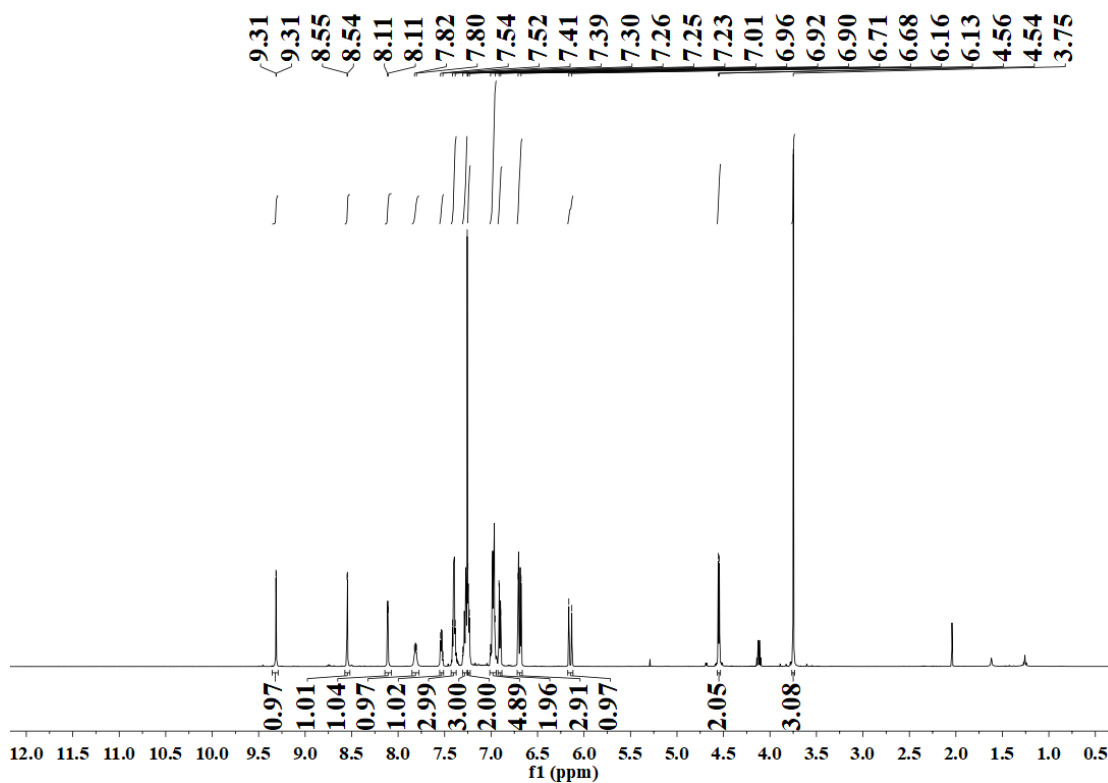

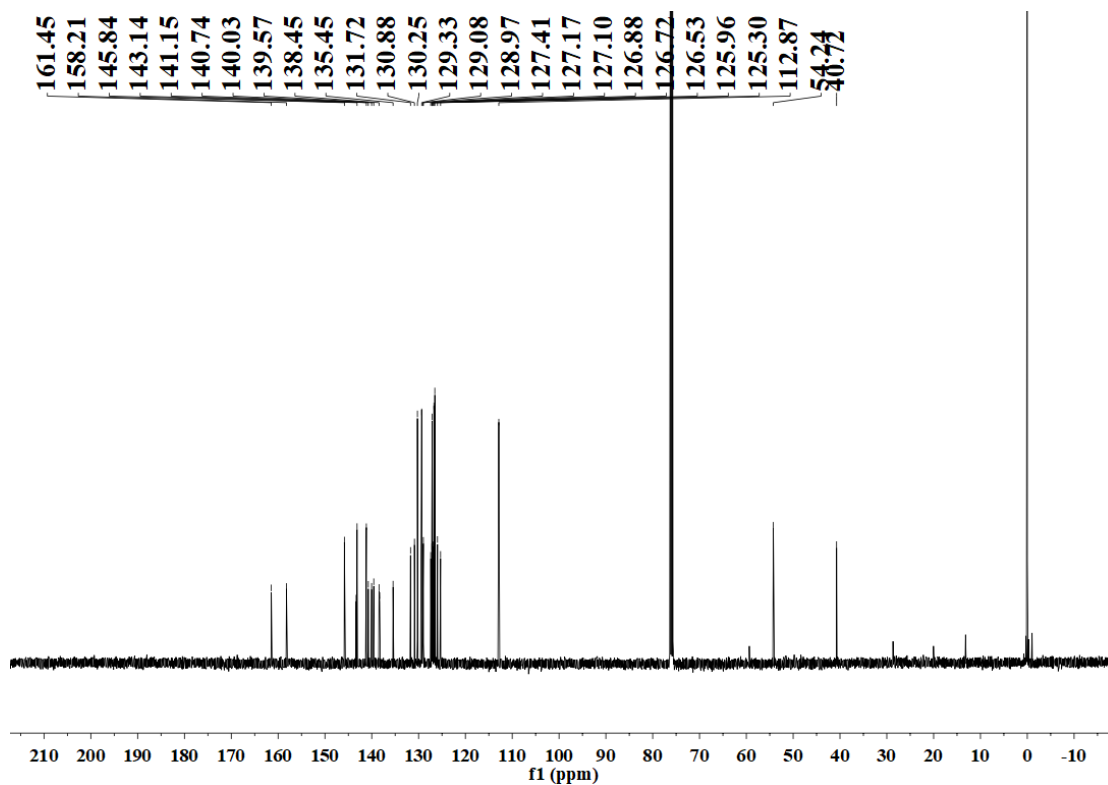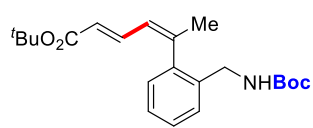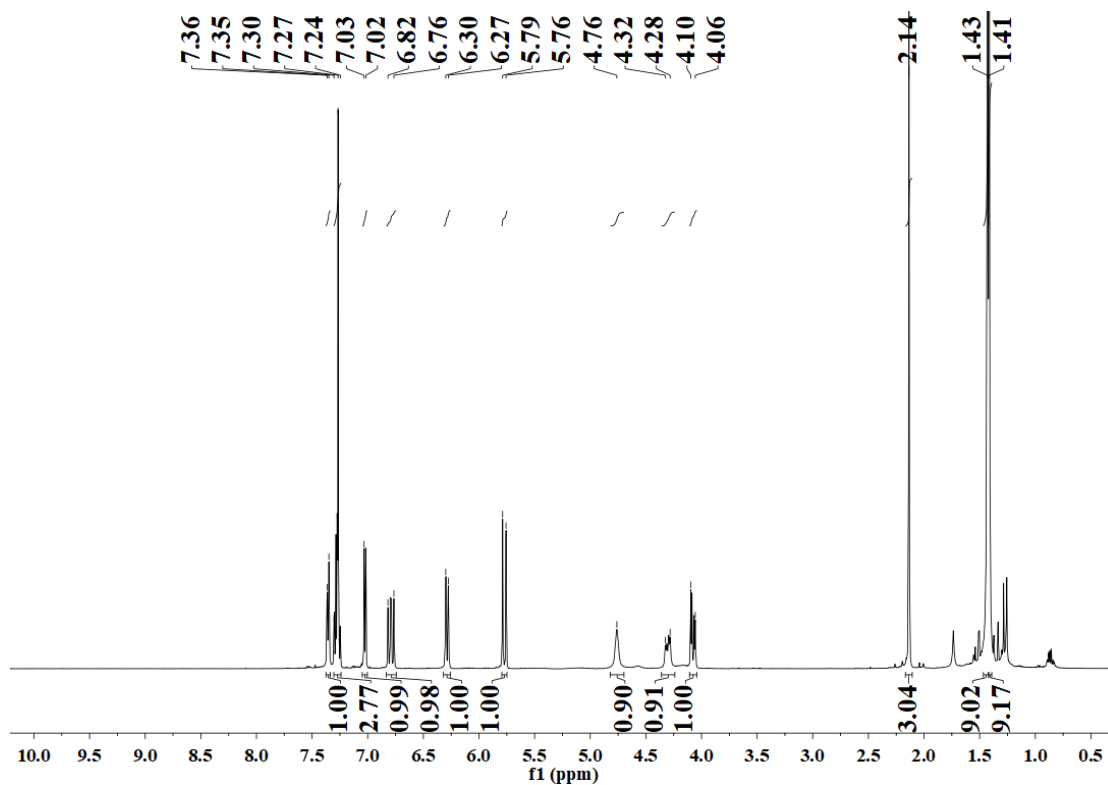

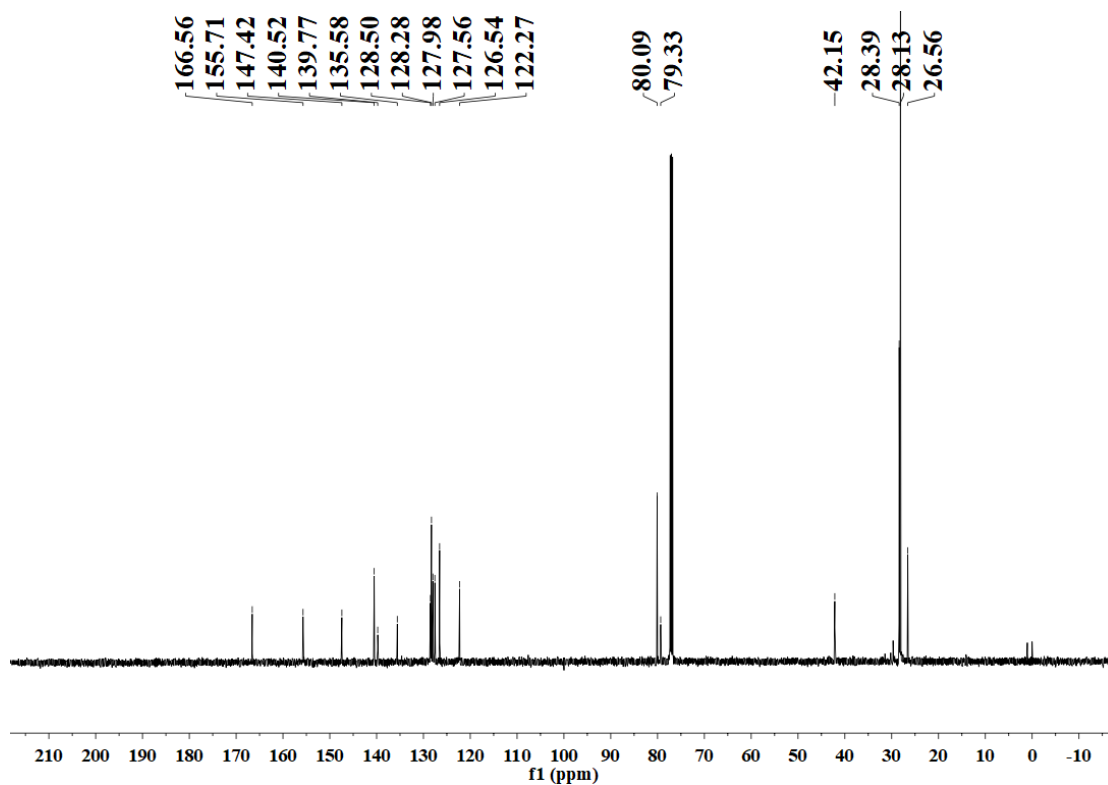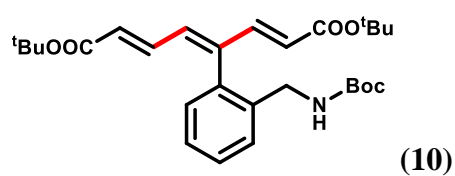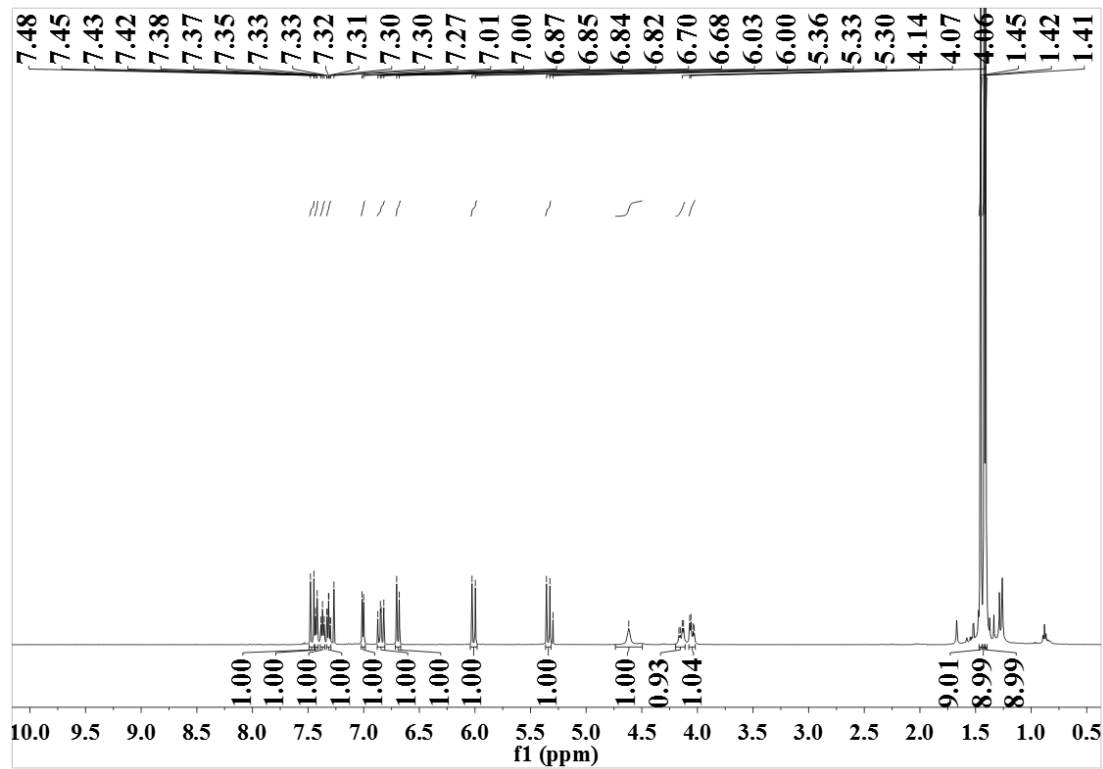



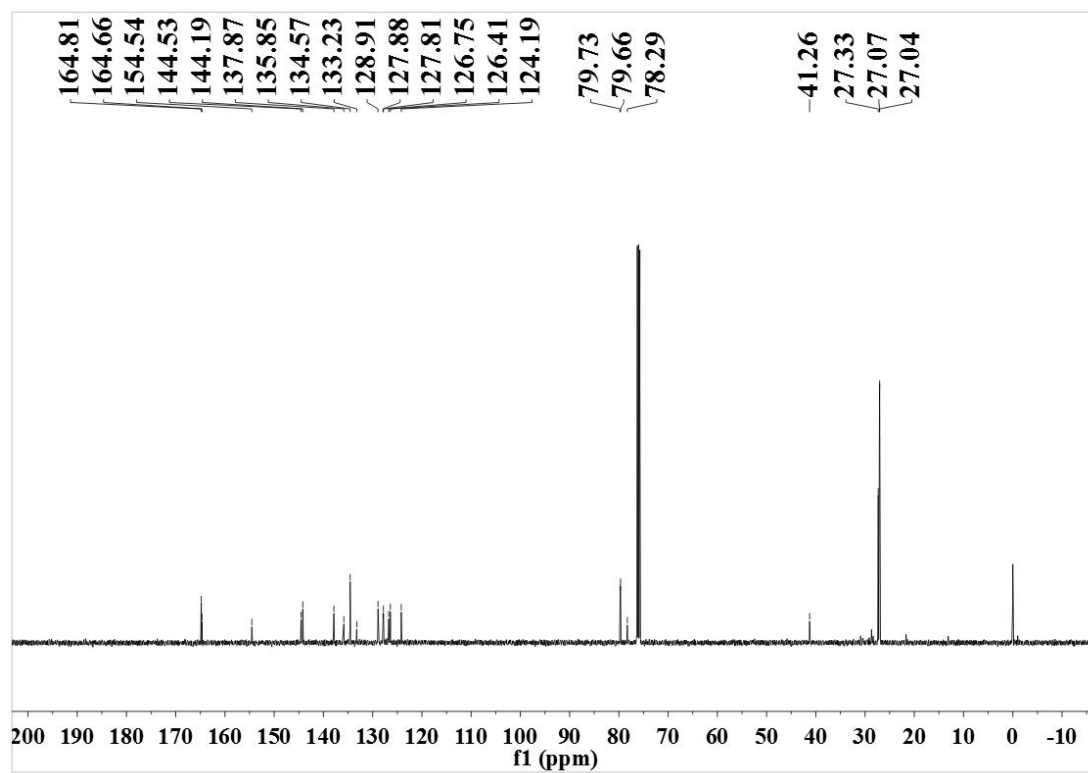

Supplement: d1qo01676h1.pdf [file d1qo01676h1.pdf]
